# Supplementary material
Source: PubMed Central journal article supplement (PMC5941131)
Supplement: NIHMS964039-supplement-Supporting_Information.pdf [file NIHMS964039-supplement-Supporting_Information.pdf]

## Supporting Information

### Rhodium(III)-Catalyzed Imidoyl C–H Activation for Annulations to Azolopyrimidines

Kim Søholm Halskov, Michael R. Witten, Gia L. Hoang, Brandon Q. Mercado, and Jonathan A. Ellman\*

*Department of Chemistry, Yale University, New Haven, Connecticut 06520, United States*

Email: jonathan.ellman@yale.edu

#### Contents

|                                                                                                                      |      |
|----------------------------------------------------------------------------------------------------------------------|------|
| 1. General Information.....                                                                                          | S1   |
| 2. Optimization Data .....                                                                                           | S3   |
| 3. Synthesis and Characterization of Azolo Imines <b>1</b> .....                                                     | S5   |
| 4. Synthesis and Characterization of Sulfoxonium Ylides <b>2</b> .....                                               | S10  |
| 5. Synthesis and Characterization of Heterocycles <b>3</b> .....                                                     | S11  |
| 6. Synthesis and Characterization of Heterocycles <b>5</b> .....                                                     | S22  |
| 7. Synthesis and Characterization of Heterocycles <b>7</b> .....                                                     | S27  |
| 8. Experiments with Rhodacycle <b>8</b> .....                                                                        | S34  |
| 9. Studies with Deuterated <b>1a-D</b> .....                                                                         | S36  |
| 10. Catalytic Cycles.....                                                                                            | S44  |
| 11. <sup>1</sup> H and <sup>13</sup> C NMR Spectra of New Imines, Ylides, Heterocycles, and Rhodacycle <b>8</b> .... | S45  |
| 12. X-Ray Crystallography Information.....                                                                           | S107 |

#### 1. General Information

Flasks were fitted with rubber septa. Reactions were conducted under air unless noted. Stainless steel syringes were used to transfer air- and moisture-sensitive liquids. Flash chromatography was performed using silica gel 60 (230–400 mesh). Commercial reagents were used as received with the following exceptions: dichloromethane, 1,4-dioxane, and tetrahydrofuran were dried by passing through columns of activated alumina. Triethylamine was distilled from CaH<sub>2</sub> at 760 Torr. Chemical shifts for protons are reported in parts per million downfield from tetramethylsilane and are referenced to residual protium in the NMR solvent. Chemical shifts for carbon are reported in parts per million downfield from tetramethylsilane and are referenced to the carbon resonances of the solvent. Data are represented as follows: chemical shift (multiplicity (br = broad, s = singlet, d = doublet, t = triplet, q = quartet, quin = quintet, hept = heptet, m = multiplet), coupling constants in Hertz (Hz), integration). The mass spectral data were obtained on an Agilent 6550A quadrupole time-of-flight LC/MS spectrometer (ESI-TOF).

## 2. Optimization Data

### Optimization of reaction between (*E*)-*N*-(1*H*-imidazol-2-yl)-1-phenylmethanimine (**1a**) and 2-(dimethyl(oxo)- $\lambda^6$ -sulfanylidene)-1-(*m*-tolyl)ethan-1-one (**2a**):

Optimization of the reaction was performed with iminyl azole **1a** and sulfoxonium ylide **2a** (Table S1). Beginning at 80 °C in THF, low but measurable yield of heterocycle **3a** was obtained (entry 1). The inclusion of 2.0 equiv PivOH was next found to be beneficial (entry 2). In three separate experiments, we observed yield improvements with the additional inclusion of NaOAc (entry 3), the additional inclusion of 3Å molecular sieves (entry 4), and an increase in temperature to 100 °C (entry 5). Taken together, these three changes in conditions improved the yield to 75% (entry 6). Although the exclusion of PivOH (entry 7) was not detrimental for the parent reaction, we found its inclusion to significantly help for many other ylides and imines. AcOH was inferior to PivOH as an acid additive (entry 8). Based on precedent by the Li group in C–H functionalization with sulfoxonium ylides followed by cyclodehydration, we attempted to use Zn(OTf)<sub>2</sub> as a Lewis acid additive with no success (entry 11).<sup>1</sup> We confirmed that the process was indeed Rh(III)-catalyzed by excluding catalyst altogether (entry 10), and the catalyst system [Cp\**Rh*Cl<sub>2</sub>]<sub>2</sub>/AgSbF<sub>6</sub> also facilitated the reaction in a good yield (entry 11, next page). Wishing to run the reaction in a solvent at or below its boiling temperature, we switched to 1,4-dioxane (entries 12 and 13), with no appreciable change in yield. The conditions in entry 13 were taken as standard for the substrate scope experiments.

**Table S1.** Reaction of Azolo Imine **1a** with Sulfoxonium Ylide **2a**.<sup>a</sup>

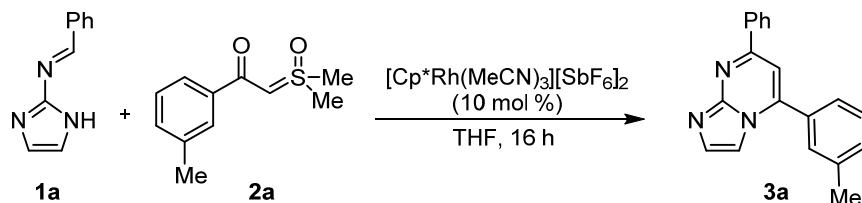

| Entry | Temperature | Variation from Initial Conditions                           | Yield <b>3a</b> (%) <sup>b</sup> |
|-------|-------------|-------------------------------------------------------------|----------------------------------|
| 1     | 80 °C       | None                                                        | 10                               |
| 2     | 80 °C       | PivOH (2.0 equiv)                                           | 28                               |
| 3     | 80 °C       | PivOH (2.0 equiv) + NaOAc (1.0 equiv)                       | 50                               |
| 4     | 80 °C       | PivOH (2.0 equiv) + 3Å molecular sieves                     | 35                               |
| 5     | 100 °C      | PivOH (2.0 equiv)                                           | 44                               |
| 6     | 100 °C      | PivOH (2.0 equiv) + NaOAc (1.0 equiv) + 3Å molecular sieves | 75                               |
| 7     | 100 °C      | NaOAc (1.0 equiv) + 3Å molecular sieves                     | 69                               |
| 8     | 100 °C      | AcOH (2.0 equiv) + NaOAc (1.0 equiv) + 3Å molecular sieves  | 62                               |
| 9     | 100 °C      | Zn(OTf) <sub>2</sub> (50 mol%) + 3Å molecular sieves        | <5                               |

|    |        |                                                                                                                       |                      |
|----|--------|-----------------------------------------------------------------------------------------------------------------------|----------------------|
| 10 | 100 °C | As entry 6, excluded $[\text{Cp}^*\text{Rh}(\text{MeCN})_3][\text{SbF}_6]_2$                                          | <5                   |
| 11 | 100 °C | As entry 6 with $[\text{Cp}^*\text{RhCl}_2]_2$ (5 mol%), $\text{AgSbF}_6$ (20 mol%) as catalyst system                | 71                   |
| 12 | 100 °C | As entry 6 with $[\text{Cp}^*\text{RhCl}_2]_2$ (5 mol%), $\text{AgSbF}_6$ (20 mol%) as catalyst system in 1,4-dioxane | 66                   |
| 13 | 100 °C | As entry 6 in 1,4-dioxane                                                                                             | 76 (80) <sup>c</sup> |

<sup>a</sup>Conditions: **1a** (0.10 mmol), **2a** (1.5 equiv), 0.1 M, 16 h. <sup>b</sup>Yield determined by <sup>1</sup>H-NMR relative to 1,3,5-trimethoxybenzene as external standard. <sup>c</sup>0.30 mmol **1a**, isolated yield after chromatography on silica.

### Optimization of reaction between (*E*)-*N*-(1*H*-imidazol-2-yl)-1-phenylmethanimine (**1a**) and ethyl 2-diazo-3-oxobutanoate (**4**):

Optimization of the reaction was performed with iminyl azole **1a** and diazoketone **4** (Table S2). The reaction conditions employed for the coupling between imines **1** and sulfoxonium ylides **2** were employed as a starting point (entry 1). The exclusion of PivOH (entry 2) or NaOAc (entry 3) both resulted in diminished yields. A slight decrease in yield was also observed when the reaction was performed at 80 °C (entry 4). The catalyst system  $[\text{Cp}^*\text{RhCl}_2]_2/\text{AgSbF}_6$ , in which  $\text{AgSbF}_6$  acts as a halide abstractor, also facilitated the reaction in a good yield (entry 5). In the absence of a rhodium catalyst, no product formation was observed (entry 6).

**Table S2.** Reaction of Azolo Imine **1a** with diazoketone **4**.<sup>a</sup>

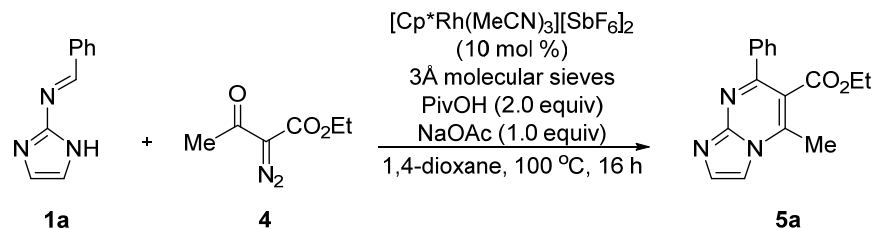

| Entry | Variation from Optimized Conditions                                                    | Yield <b>5a</b> (%) <sup>b</sup> |
|-------|----------------------------------------------------------------------------------------|----------------------------------|
| 1     | None                                                                                   | 66 (79) <sup>c</sup>             |
| 2     | Excluded PivOH                                                                         | 52                               |
| 3     | Excluded NaOAc                                                                         | 43                               |
| 4     | Reaction performed at 80 °C                                                            | 61                               |
| 5     | $[\text{Cp}^*\text{RhCl}_2]_2$ (5 mol%), $\text{AgSbF}_6$ (20 mol%) as catalyst system | 62                               |
| 6     | Excluded $[\text{Cp}^*\text{Rh}(\text{MeCN})_3][\text{SbF}_6]_2$                       | <5                               |

<sup>a</sup>Conditions: **1a** (0.10 mmol), **4** (1.5 equiv), 0.1 M, 16 h. <sup>b</sup>Yield determined by <sup>1</sup>H-NMR relative to 1,3,5-trimethoxybenzene as external standard. <sup>c</sup>0.30 mmol **1a**, isolated yield after chromatography on silica.

### Optimization of reaction between (*E*)-*N*-(1*H*-imidazol-2-yl)-1-phenylmethanimine (**1a**) and 3-hexyne (**6a**):

Optimization of the reaction was performed with iminyl azole **1a** and 3-hexyne **6a** (Table S3). A solvent screen revealed that THF (entry 2) and 1,4-dioxane (entry 3) gave low yields in the coupling with alkynes, despite being efficient solvents in the couplings with sulfoxonium ylides and diazoketones. Other solvents that are commonly employed in rhodium(III)-catalyzed C–H functionalization were then tested. 1,2-DCE (entry 5) and MeOH (entry 6) gave improved yields, with TFE giving the highest yield (entry 1). Using [Cp\*RhCl<sub>2</sub>]<sub>2</sub>/AgSbF<sub>6</sub> as the catalyst system resulted in similar yields (7). No product formation was observed, when the rhodium catalyst (entry 8) or the copper(II) oxidant (entry 9) were excluded.

**Table S3.** Reaction of Azolo Imine **1a** with 3-hexyne **6a**.<sup>a</sup>

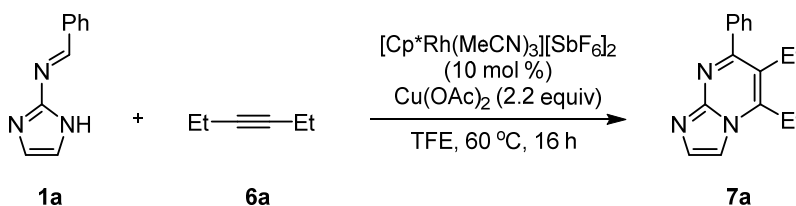

| Entry | Variation from Optimized Conditions                                                            | Yield <b>7a</b> (%) <sup>b</sup> |
|-------|------------------------------------------------------------------------------------------------|----------------------------------|
| 1     | None                                                                                           | 65 (66) <sup>c</sup>             |
| 2     | THF as solvent                                                                                 | 31                               |
| 3     | 1,4-dioxane as solvent                                                                         | 21                               |
| 4     | PhMe as solvent                                                                                | 36                               |
| 5     | 1,2-DCE as solvent                                                                             | 58                               |
| 6     | MeOH as solvent                                                                                | 62                               |
| 7     | [Cp*RhCl <sub>2</sub> ] <sub>2</sub> (5 mol%), AgSbF <sub>6</sub> (20 mol%) as catalyst system | 67                               |
| 8     | Excluded [Cp*Rh(MeCN) <sub>3</sub> ][SbF <sub>6</sub> ] <sub>2</sub>                           | <5                               |
| 9     | Excluded Cu(OAc) <sub>2</sub>                                                                  | <5                               |

<sup>a</sup>Conditions: **1a** (0.10 mmol), **6a** (1.5 equiv), 0.1 M, 16 h. <sup>b</sup>Yield determined by <sup>1</sup>H-NMR relative to 1,3,5-trimethoxybenzene as external standard. <sup>c</sup>0.30 mmol **1a**, isolated yield after chromatography on silica.

### 3. Synthesis and Characterization of Azolo Imines 1

Iminyl azoles **1a–c** were formed according to literature procedures.<sup>2</sup> Imines **1d–f,h–j,l** were synthesized in analogous fashion by coupling of the appropriate amine and aldehyde. Imine **1g** was synthesized according to a literature procedure.<sup>3</sup> Synthesis of imine **1k** is described below. Spectral data for imines **1a–c,g** matched those reported in the literature.

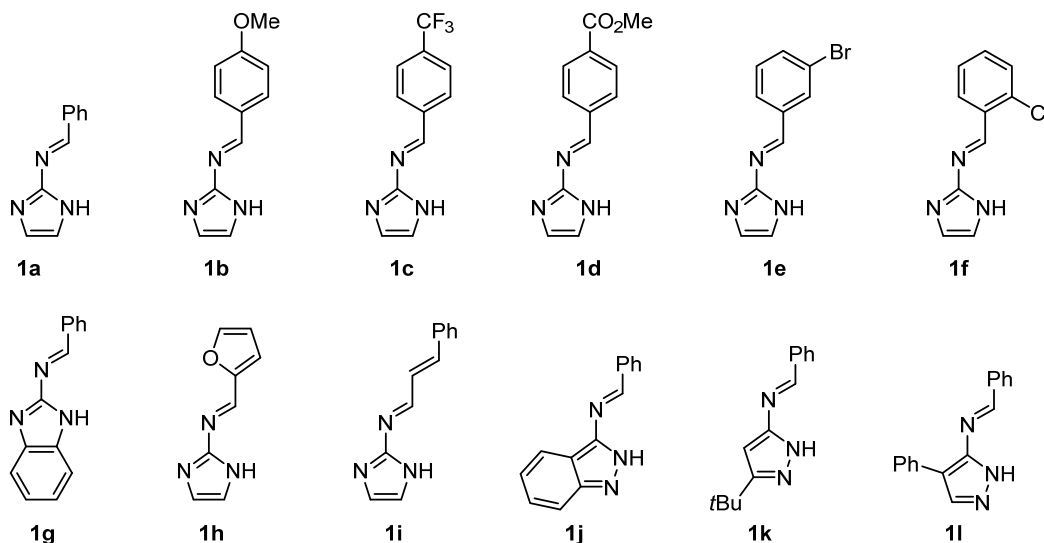

#### General Procedure A: Synthesis of azolo imines 1

To a solution of aldehyde (1.0 equiv) in dichloromethane (1 M) were added sequentially aminoazole sulfate (1.0 equiv), titanium(IV) ethoxide (1.6 equiv), and triethylamine (2 equiv). The reaction mixture was stirred at ambient temperature for 18 h. The reaction mixture was quenched with H<sub>2</sub>O (2 x volume of dichloromethane). The resulting solid was filtered and washed with dichloromethane. The filtrate was transferred to a separatory funnel, and the layers were separated. The organic layer was dried over MgSO<sub>4</sub>, filtered, and concentrated *in vacuo*. Then the crude material was filtered through a plug of silica with 50% EtOAc/hexanes. Subsequently, the imine was recrystallized in EtOAc/hexanes (yields for imines were not optimized).

#### General Procedure B: Synthesis of azolo imines 1

To a solution of aldehyde (1.5 equiv) in tetrahydrofuran (1 M) were added sequentially amine (1.0 equiv) and titanium(IV) ethoxide (1.6 equiv). The reaction mixture was stirred at ambient temperature for 18 h. *N,N,N',N'*-Tetrakis(2-hydroxyethyl)ethylenediamine was then added to the solution (equal volume to tetrahydrofuran) and the mixture was stirred at 55 °C for 15 min. The mixture was cooled to room temperature and transferred to a separatory funnel where it was quenched with NH<sub>4</sub>OH and brine and extracted with EtOAc. The organic phases were combined, dried with MgSO<sub>4</sub> and concentrated *in vacuo*. The product was purified by silica gel column chromatography (yields for imines were not optimized).

**Methyl (*E*)-4-(((1*H*-imidazol-2-yl)imino)methyl)benzoate (**1d**)**

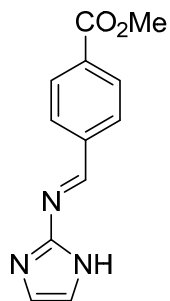

Synthesized according to General Procedure A: Methyl 4-formylbenzoate (2.6 mL, 20 mmol, 1.0 equiv), 2-aminoimidazole sulfate (2.64 g, 20.0 mmol, 1.0 equiv), triethylamine (5.6 mL, 40 mmol, 2.0 equiv), titanium(IV) ethoxide (6.7 mL, 32 mmol, 1.6 equiv), and dichloromethane (20 mL). Recrystallization (EtOAc/hexanes) afforded **1d** (353 mg, 8%) as a yellow solid. FTIR (neat) 1723, 1281, 1110, 737, 729, 718, 436  $\text{cm}^{-1}$ .  $^1\text{H-NMR}$  (600 MHz,  $(\text{CD}_3)_2\text{SO}$ )  $\delta$  12.45 (s, 1H), 9.21 (s, 1H), 8.09–8.07 (m, 4H), 7.21 (s, 1H), 6.97 (s, 1H), 3.89 (s, 3H).  $^{13}\text{C-NMR}$  (150 MHz,  $(\text{CD}_3)_2\text{SO}$ )  $\delta$  165.8, 157.8, 150.2, 139.8, 131.7, 129.7, 128.8, 128.1, 117.6, 52.4. HRMS (ESI/[M+H] $^+$ ): calcd for  $\text{C}_{12}\text{H}_{12}\text{N}_3\text{O}_2^+$ : 230.0924; Found 230.0924.

**(*E*)-1-(3-Bromophenyl)-*N*-(1*H*-imidazol-2-yl)methanimine (**1e**)**

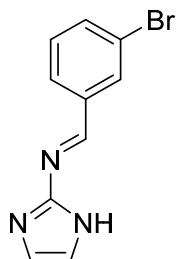

Synthesized according to General Procedure A: *m*-Bromobenzaldehyde (3.3 mL, 29 mmol, 1.0 equiv), 2-aminoimidazole sulfate (3.88 g, 28.6 mmol, 1.0 equiv), triethylamine (8.0 mL, 57 mmol, 2.0 equiv), titanium(IV) isopropoxide (13.6 mL, 57.4 mmol, 1.6 equiv), and dichloromethane (30 mL). Recrystallization (EtOAc/hexanes) afforded **1e** (2.88 g, 39%) as a grey solid. FTIR (neat) 1614, 1560, 1451, 1427, 1344, 1265, 1204, 1106, 1068, 996, 889, 784, 739, 678  $\text{cm}^{-1}$ .  $^1\text{H-NMR}$  (600 MHz,  $(\text{CD}_3)_2\text{CO}$ )  $\delta$  11.59 (bs, 1H), 9.19 (s, 1H), 8.13 (d,  $J = 1.9$  Hz, 1H), 7.91 (dt,  $J = 7.8$ ; 1.2 Hz, 1H), 7.68 (ddd,  $J = 7.9$ ; 1.9; 1.2 Hz, 1H), 7.45 (t,  $J = 7.8$  Hz, 1H), 7.11 (bs, 2H).  $^{13}\text{C-NMR}$  (150 MHz,  $(\text{CD}_3)_2\text{CO}$ )  $\delta$  158.1, 151.1, 139.0, 134.6, 131.3, 131.2, 128.5, 123.0. Note: two carbons were not observed due the slow exchange of the N-H proton, which causes these signals of the imidazole carbons to be broadened.<sup>4</sup> HRMS (ESI/[M+H] $^+$ ): calcd for  $\text{C}_{10}\text{H}_9\text{BrN}_3^+$ : 249.9974 and 251.9954; Found 249.9975 and 251.9956.

**(E)-1-(2-Chlorophenyl)-N-(1H-imidazol-2-yl)methanimine (1f)**

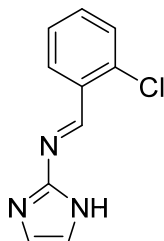

Synthesized according to General Procedure A: 2-Chlorobenzaldehyde (1.1 mL, 10 mmol, 1.0 equiv), 2-aminoimidazole sulfate (1.32 g, 10.0 mmol, 1.0 equiv), triethylamine (2.8 mL, 20 mmol, 2.0 equiv), titanium(IV) ethoxide (3.4 mL, 16 mmol, 1.6 equiv), and dichloromethane (10 mL). Recrystallization (EtOAc/hexanes) afforded **1f** (527 mg, 26%) as a yellow solid. FTIR (neat) 1607, 1452, 1107, 754, 742, 730, 687  $\text{cm}^{-1}$ .  $^1\text{H-NMR}$  (600 MHz,  $(\text{CD}_3)_2\text{SO}$ )  $\delta$  12.48 (s, 1H), 9.49 (s, 1H), 8.15 (dd,  $J = 7.8$ ; 1.8 Hz, 1H), 7.60 (dd,  $J = 7.8$ ; 1.2 Hz, 1H), 7.56 (dt,  $J = 7.2$ ; 1.8 Hz, 1H), 7.49 (tt,  $J = 7.2$ ; 1.2 Hz, 1H), 7.21 (s, 1H), 6.96 (s, 1H).  $^{13}\text{C-NMR}$  (150 MHz,  $(\text{CD}_3)_2\text{SO}$ )  $\delta$  154.5, 150.3, 135.3, 133.1, 132.4, 130.3, 128.0, 127.8, 127.7, 117.6. HRMS (ESI/[ $\text{M}+\text{H}$ ] $^+$ ): calcd for  $\text{C}_{10}\text{H}_9\text{ClN}_3^+$ : 206.0480; Found 206.0484.

**(E)-1-(Furan-2-yl)-N-(1H-imidazol-2-yl)methanimine (1h)**

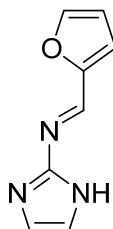

Synthesized according to General Procedure A: Furfural (2.4 mL, 29 mmol, 1.0 equiv), 2-aminoimidazole sulfate (3.88 g, 28.6 mmol, 1.0 equiv), triethylamine (8.0 mL, 57 mmol, 2.0 equiv), titanium(IV) isopropoxide (13.6 mL, 57.4 mmol, 1.6 equiv), and dichloromethane (30 mL). Recrystallization (EtOAc/hexanes) afforded **1h** (940 mg, 20%) as a brown solid. FTIR (neat) 1608, 1561, 1481, 1451, 1367, 1266, 1104, 1020, 934, 883, 749, 722  $\text{cm}^{-1}$ .  $^1\text{H-NMR}$  (600 MHz,  $(\text{CD}_3)_2\text{SO}$ )  $\delta$  12.32 (bs, 1H), 8.91 (s, 1H), 7.96–7.94 (m, 1H), 7.23 (d,  $J = 3.5$  Hz, 1H), 7.12 (bs, 1H), 6.91 (bs, 1H), 6.72 (dd,  $J = 3.5$ , 1.7 Hz, 1H).  $^{13}\text{C-NMR}$  (150 MHz,  $(\text{CD}_3)_2\text{SO}$ )  $\delta$  151.7, 150.7, 146.9, 146.4, 127.6 (br), 118.4, 116.9 (br), 112.8. HRMS (ESI/[ $\text{M}+\text{H}$ ] $^+$ ): calcd for  $\text{C}_8\text{H}_8\text{N}_3\text{O}^+$ : 162.0662; Found 162.0665.

**(1E,2E)-N-(1H-Imidazol-2-yl)-3-phenylprop-2-en-1-imine (1i)**

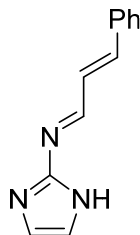

Synthesized according to General Procedure A: Cinnamaldehyde (2.5 mL, 20 mmol, 1.0 equiv), 2-aminoimidazole sulfate (2.64 g, 20.0 mmol, 1.0 equiv), triethylamine (5.6 mL, 40 mmol, 2.0 equiv), titanium(IV) ethoxide (6.7 mL, 32 mmol, 1.6 equiv), and dichloromethane (20 mL). Recrystallization (EtOAc/hexanes) afforded **1i** (581 mg, 17%) as a yellow solid. FTIR (neat) 1587, 1112, 986, 750, 721  $\text{cm}^{-1}$ .  $^1\text{H-NMR}$  (600 MHz,  $(\text{CD}_3)_2\text{SO}$ )  $\delta$  12.20 (bs, 1H), 8.91 (d,  $J = 9.3$  Hz, 1H), 7.68 (d,  $J = 7.3$  Hz, 2H), 7.48–7.34 (m, 4H), 7.13 (bs, 1H), 7.12 (dd,  $J = 15.9; 9.3$  Hz, 1H), 6.91 (bs, 1H).  $^{13}\text{C-NMR}$  (150 MHz,  $(\text{CD}_3)_2\text{SO}$ )  $\delta$  160.5, 151.0 (br), 144.9, 135.5, 129.7, 128.9, 128.0, 127.7, 116.9 (br). HRMS (ESI/[M+H] $^+$ ): calcd for  $\text{C}_{12}\text{H}_{12}\text{N}_3^+$ : 198.1026; Found 198.1026.

**(E)-N-(2H-Indazol-3-yl)-1-phenylmethanimine (1j)**

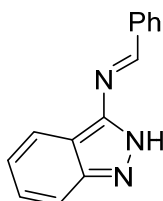

Synthesized according to General Procedure B: Benzaldehyde (2.3 mL, 23 mmol, 1.5 equiv), 2H-indazol-3-amine (2.00 g, 15.0 mmol, 1.0 equiv), titanium(IV) ethoxide (7.1 mL, 24 mmol, 1.6 equiv), and tetrahydrofuran (15 mL). Purification by silica gel column chromatography (10%, then 20%, then 30% EtOAc/hexanes) afforded **1j** (1.71 g, 51%) as a yellow solid. In a solution of  $(\text{CD}_3)_2\text{SO}$ , this compound existed as a 3:1 ratio of its two tautomers. For characterization, \*denotes minor isomer, + denotes overlap of signals of both isomers, whereas no sign denotes signal of major isomer. FTIR (neat) 1050, 1023, 1001, 823, 759, 499  $\text{cm}^{-1}$ .  $^1\text{H-NMR}$  (600 MHz,  $(\text{CD}_3)_2\text{SO}$ )  $\delta$  13.01 (s, 1H), 11.63 (s, 1H)\*, 9.24 (s, 1H), 9.16 (s, 1H)\*, 8.09–8.04 (m, 2H), 8.04–8.00 (m, 2H)\*, 7.98–7.93 (m, 2H) $^+$ , 7.85 (d,  $J = 9.4$  Hz, 1H)\*, 7.72 (d,  $J = 9.4$  Hz, 1H)\*, 7.59–7.16 (m, 9) $^+$ , 6.95 (ddd,  $J = 7.9; 6.2; 1.4$  Hz, 1H)\*.  $^{13}\text{C-NMR}$  (150 MHz,  $(\text{CD}_3)_2\text{SO}$ )  $\delta$  160.3, 160.0, 150.6, 149.6, 147.4, 141.5, 141.0, 139.4, 136.2, 136.1, 131.60, 131.55, 128.9, 128.68, 128.66, 128.4, 126.8, 126.6, 121.2, 120.9, 120.7, 120.3, 120.0, 117.8, 117.7, 117.1, 113.4, 111.2, 110.6, 109.3. HRMS (ESI/[M+H] $^+$ ): calcd for  $\text{C}_{14}\text{H}_{12}\text{N}_3^+$ : 222.1026; Found 222.1026.

**(E)-N-(3-(tert-Butyl)-1H-pyrazol-5-yl)-1-phenylmethanimine (1k)**

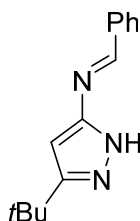

3-*tert*-Butyl-1H-pyrazol-5-amine (1.67 g, 12.0 mmol, 1.2 equiv) and benzaldehyde (1.0 mL, 10 mmol, 1.0 equiv) were dissolved in dichloromethane (20 mL) containing 3Å molecular sieves (approximately 10 g) in a flame-dried 100-mL flask. The mixture was stirred at ambient temperature for 18 h. The suspension was filtered through filter paper and then through basic alumina eluting with dichloromethane. Then it was concentrated *in vacuo*. Following concentration under high vacuum, the compound was obtained in a 94:6 ratio by weight with dichloromethane that could not be further removed, in 74% yield. The material was applied in this form in subsequent reactions. FTIR (neat) 1622, 1578, 1463, 1366, 1312, 1286, 1236, 1168, 1011,



1001, 757, 707, 691  $\text{cm}^{-1}$ .  $^1\text{H-NMR}$  (600 MHz,  $(\text{CD}_3)_2\text{SO}$ )  $\delta$  12.47 (s, 1H), 8.84 (s, 1H), 7.90 (dd,  $J = 6.7; 3.0$  Hz, 2H), 7.56–7.40 (m, 3H), 6.22 (s, 1H), 1.29 (s, 9H).  $^{13}\text{C-NMR}$  (150 MHz,  $(\text{CD}_3)_2\text{SO}$ )  $\delta$  158.9, 158.1, 153.6, 136.4, 131.1, 128.8, 128.3, 91.8, 30.7, 30.0. HRMS (ESI/[M+H] $^+$ ): calcd for  $\text{C}_{14}\text{H}_{18}\text{N}_3^+$ : 228.1495; Found 228.1495.

**(E)-1-Phenyl-N-(4-phenyl-1H-pyrazol-5-yl)methanimine (11)**

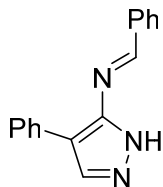

Synthesized according to General Procedure B: Benzaldehyde (1.5 mL, 15 mmol, 1.5 equiv), 4-phenyl-1H-pyrazol-5-amine (1.59 g, 10.0 mmol, 1.0 equiv), titanium(IV) ethoxide (4.8 mL, 16 mmol, 1.6 equiv), and tetrahydrofuran (15 mL). Purification by silica gel column chromatography (10%, then 20%, then 30% EtOAc/hexanes) afforded **11** (1.38 g, 56%) as a white solid. FTIR (neat) 1989, 1265, 764, 731, 697  $\text{cm}^{-1}$ .  $^1\text{H-NMR}$  (400 MHz,  $(\text{CD}_3)_2\text{SO}$ )  $\delta$  12.87 (s, 1H), 9.06 (s, 1H), 8.19 (d,  $J = 1.6$  Hz, 1H), 7.99 (dd,  $J = 6.7; 2.9$  Hz, 2H), 7.92–7.81 (m, 2H), 7.64–7.48 (m, 3H), 7.38 (t,  $J = 7.7$  Hz, 2H), 7.20 (t,  $J = 7.4$  Hz, 1H).  $^{13}\text{C-NMR}$  (100 MHz,  $(\text{CD}_3)_2\text{SO}$ )  $\delta$  159.1, 154.3, 136.2, 132.9, 131.4, 128.9, 128.6, 128.4, 128.1, 126.8, 125.7, 114.7. HRMS (ESI/[M+H] $^+$ ): calcd for  $\text{C}_{16}\text{H}_{14}\text{N}_3^+$ : 248.1182; Found 248.1183.

#### 4. Synthesis and Characterization of Sulfoxonium Ylides **2**

The syntheses of all sulfoxonium ylides other than **2a** have been previously reported. Ylides **2b** and **2c** were formed according to Wu *et al.*<sup>5</sup> Ylides **2d–f** were formed according to Phelps *et al.*<sup>6</sup> Ylide **2a** was synthesized in analogous fashion, as detailed below. Ylides **2g** and **2h** were formed according to Barday *et al.*<sup>7</sup> Spectral data for ylides **2b–h** matched those reported in the literature.

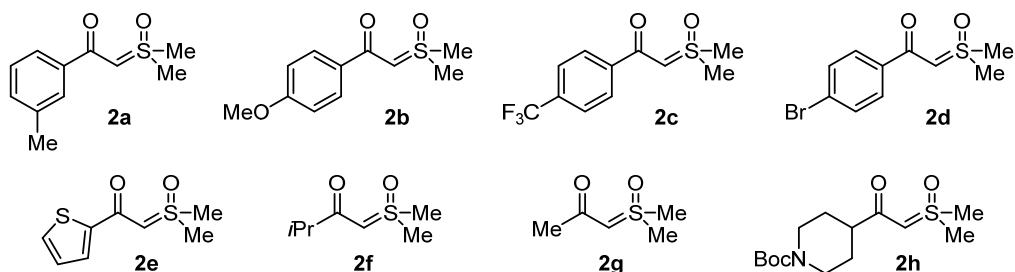

#### 2-(Dimethyl(oxo)- $\lambda^6$ -sulfanylidene)-1-(m-tolyl)ethan-1-one (**2a**)

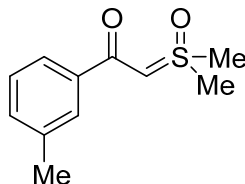

Trimethylsulfoxonium iodide (9.90 g, 45.0 mmol, 3.0 equiv) was dissolved in anhydrous THF (150 mL) in a flame-dried 250-mL round-bottom flask equipped with a magnetic stir bar and reflux condenser. To this reaction mixture was added solid sodium *tert*-butoxide (4.54 g, 47.3 mmol, 3.15 equiv), and the suspension was heated to reflux for 2 h. The flask was cooled to room temperature, and *m*-toluoyl chloride (1.98 mL, 2.32 g, 15.0 mmol, 1.0 equiv) was added dropwise by syringe. The reaction mixture was stirred at room temperature for 18 h, then the reaction was quenched with H<sub>2</sub>O (250 mL). The aqueous layer was extracted with EtOAc (3 x 150 mL), then the pooled organic extracts were washed with brine (150 mL). The organic layer was dried over NaSO<sub>4</sub>, filtered, and concentrated *in vacuo*. The resulting solid was added to a 50-mL round-bottom flask, suspended in 16 mL EtOAc, and heated to 50 °C for 1 h, resulting in full dissolution of solids. The mixture was then cooled to room temperature with constant stirring, resulting in precipitation of pure ylide **2a**, which was filtered through a Buchner funnel under vacuum and washed with cold EtOAc. Drying *in vacuo* afforded **2a** (1.49 g, 47%) as a white solid. FTIR (neat) 1531, 1420, 1390, 1174, 1076, 1037, 867, 736, 438 cm<sup>-1</sup>. <sup>1</sup>H-NMR (500 MHz, CDCl<sub>3</sub>)  $\delta$  7.62 (s, 1H), 7.57 (d, *J* = 7.3 Hz, 1H), 7.28–7.22 (m, 2H), 4.96 (s, 1H), 3.49 (s, 6H), 2.37 (s, 3H). <sup>13</sup>C-NMR (125 MHz, CDCl<sub>3</sub>)  $\delta$  182.6, 138.9, 137.9, 131.6, 128.2, 127.3, 123.8, 68.3, 42.6, 21.5. HRMS (ESI/[M+H]<sup>+</sup>): calcd for C<sub>11</sub>H<sub>15</sub>O<sub>2</sub>S<sup>+</sup>: 211.0787; Found 211.0788.

## 5. Synthesis and Characterization of Heterocycles 3

### General Procedure C: Rh(III)-catalyzed coupling of imines with sulfoxonium ylides

To a flame-dried microwave tube in a glove box was added the imine (**1**, 1.0 equiv), the sulfoxonium ylide (**2**, 1.5 equiv), [Cp\*Rh(MeCN)<sub>3</sub>][SbF<sub>6</sub>]<sub>2</sub> (0.1 equiv), pivalic acid (2.0–4.0 equiv), sodium acetate (1.0 equiv), 3Å molecular sieves and 1,4-dioxane or tetrahydrofuran (0.1 M). The tube was capped, and the reaction mixture was stirred at the indicated temperature for 16 h. The reaction mixture was cooled to ambient temperature and filtered through a plug of Celite with dichloromethane. The solvent was removed *in vacuo* and the crude reaction mixture was subjected to silica gel column chromatography to yield the product.

### 7-Phenyl-5-(*m*-tolyl)imidazo[1,2-*a*]pyrimidine (**3a**)

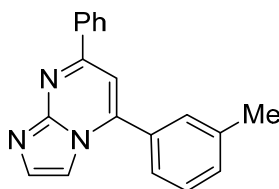

Synthesized according to General Procedure C: (*E*)-*N*-(1*H*-Imidazol-2-yl)-1-phenylmethanimine **1a** (51 mg, 0.30 mmol, 1.0 equiv), 2-(dimethyl(oxo)-λ<sup>6</sup>-sulfanylidene)-1-(*m*-tolyl)ethan-1-one **2a** (95 mg, 0.45 mmol, 1.5 equiv), [Cp\*Rh(MeCN)<sub>3</sub>][SbF<sub>6</sub>]<sub>2</sub> (25 mg, 0.03 mmol, 0.10 equiv), pivalic acid (61 mg, 0.60 mmol, 2.0 equiv), sodium acetate (25 mg, 0.30 mmol, 1.0 equiv), 3Å molecular sieves (approximately 70 mg), and 1,4-dioxane (3 mL). The reaction mixture was stirred at 100 °C. Purification by silica gel column chromatography (40% acetone/hexanes) afforded **3a** (69 mg, 80%) as a yellow foam. FTIR (neat) 1614, 1599, 1581, 1528, 1505, 1483, 1388, 1352, 1294, 1272, 1248, 1151, 1138, 907, 792, 779, 764, 727, 701, 650 cm<sup>-1</sup>. <sup>1</sup>H-NMR (500 MHz, CDCl<sub>3</sub>) δ 8.22 (d, *J* = 7.1 Hz, 2H), 7.81 (s, 1H), 7.65 (s, 1H), 7.55–7.47 (m, 6H), 7.42 (d, *J* = 7.5 Hz, 1H), 7.33 (s, 1H), 2.49 (s, 3H). <sup>13</sup>C-NMR (126 MHz, CDCl<sub>3</sub>) δ 157.0, 150.1, 146.5, 139.6, 137.3, 135.8, 132.7, 131.9, 130.5, 129.5, 129.0, 128.6, 127.5, 125.1, 109.2, 105.8, 21.6. HRMS (ESI/[M+H]<sup>+</sup>): calcd for C<sub>19</sub>H<sub>16</sub>N<sub>3</sub><sup>+</sup>: 286.1339; Found 286.1340.

### 7-Phenyl-5-(*m*-tolyl)imidazo[1,2-*a*]pyrimidine (**3a**) – 1 mmol Benchtop Preparation

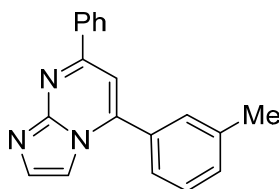

To a flame-dried 10-20 mL microwave tube was added (*E*)-*N*-(1*H*-Imidazol-2-yl)-1-phenylmethanimine **1a** (171 mg, 1.00 mmol, 1.00 equiv), 2-(dimethyl(oxo)-λ<sup>6</sup>-sulfanylidene)-1-(*m*-tolyl)ethan-1-one **2a** (315 mg, 1.50 mmol, 1.50 equiv), [Cp\*Rh(MeCN)<sub>3</sub>][SbF<sub>6</sub>]<sub>2</sub> (83.3 mg, 0.100 mmol, 0.100 equiv), pivalic acid (204 mg, 2.00 mmol, 2.00 equiv), sodium acetate (82.0 mg, 1.00 mmol, 1.00 equiv), 3Å molecular sieves (approximately 250 mg), and 1,4-dioxane (10.0 mL). The tube was capped with a teflon-lined septum, and the reaction mixture was flushed under nitrogen for ten minutes. The nitrogen line was removed, and the reaction mixture was stirred at 100 °C for 16 h. The reaction mixture was cooled to ambient temperature and filtered through a plug of Celite with dichloromethane. The solvent was removed *in vacuo* and the crude reaction

mixture was subjected to silica gel column chromatography (40% acetone/hexanes) to afford **3a** (235 mg, 82%) as a yellow foam. Spectroscopic data agreed with that reported above.

### 7-(4-Methoxyphenyl)-5-(*m*-tolyl)imidazo[1,2-*a*]pyrimidine (**3b**)

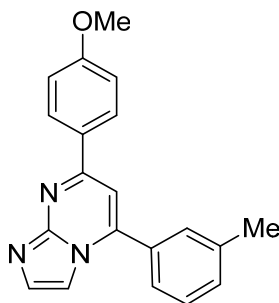

Synthesized according to General Procedure C: (*E*)-*N*-(1*H*-Imidazol-2-yl)-1-(4-methoxyphenyl)methanimine **1b** (60 mg, 0.30 mmol, 1.0 equiv), 2-(dimethyl(oxo)- $\lambda^6$ -sulfanylidene)-1-(*m*-tolyl)ethan-1-one **2a** (95 mg, 0.45 mmol, 1.5 equiv), [Cp\*Rh(MeCN)<sub>3</sub>][SbF<sub>6</sub>]<sub>2</sub> (25 mg, 0.03 mmol, 0.10 equiv), pivalic acid (61 mg, 0.60 mmol, 2.0 equiv), sodium acetate (25 mg, 0.30 mmol, 1.0 equiv), 3 Å molecular sieves (approximately 70 mg), and 1,4-dioxane (3 mL). The reaction mixture was stirred at 100 °C. Purification by silica gel column chromatography (40% acetone/hexanes) afforded **3b** (70 mg, 74%) as a yellow foam. FTIR (neat) 1599, 1579, 1531, 1509, 1484, 1274, 1239, 1173, 1151, 1137, 1028, 906, 832, 789, 724, 700, 644, 571, 523 cm<sup>-1</sup>. <sup>1</sup>H-NMR (400 MHz, CDCl<sub>3</sub>)  $\delta$  8.21 (d, *J* = 8.8 Hz, 2H), 7.76 (s, 1H), 7.60 (s, 1H), 7.55–7.47 (m, 3H), 7.42 (d, *J* = 7.1 Hz, 1H), 7.27 (s, 1H), 7.02 (d, *J* = 8.9 Hz, 2H), 3.89 (s, 3H), 2.49 (s, 3H). <sup>13</sup>C-NMR (126 MHz, CDCl<sub>3</sub>)  $\delta$  161.8, 156.6, 150.3, 146.3, 139.6, 135.4, 132.8, 131.8, 129.9, 129.4, 129.0, 128.6, 125.1, 114.3, 109.0, 105.3, 55.6, 21.6. HRMS (ESI/[M+H]<sup>+</sup>): calcd for C<sub>20</sub>H<sub>18</sub>N<sub>3</sub>O<sup>+</sup>: 316.1444; Found 316.1444.

### 5-(*m*-Tolyl)-7-(4-(trifluoromethyl)phenyl)imidazo[1,2-*a*]pyrimidine (**3c**)

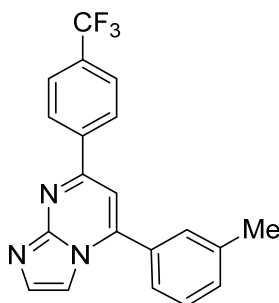

Synthesized according to General Procedure C: (*E*)-*N*-(1*H*-Imidazol-2-yl)-1-(4-(trifluoromethyl)phenyl)methanimine **1c** (72 mg, 0.30 mmol, 1.0 equiv), 2-(dimethyl(oxo)- $\lambda^6$ -sulfanylidene)-1-(*m*-tolyl)ethan-1-one **2a** (95 mg, 0.45 mmol, 1.5 equiv), [Cp\*Rh(MeCN)<sub>3</sub>][SbF<sub>6</sub>]<sub>2</sub> (25 mg, 0.03 mmol, 0.10 equiv), pivalic acid (61 mg, 0.60 mmol, 2.0 equiv), sodium acetate (25 mg, 0.30 mmol, 1.0 equiv), 3 Å molecular sieves (approximately 70 mg), and 1,4-dioxane (3 mL). The reaction mixture was stirred at 100 °C. Purification by silica gel column chromatography (40% acetone/hexanes) afforded **3c** (86 mg, 81%) as a yellow solid. FTIR (neat) 1618, 1532, 1324, 1274, 1165, 1124, 1075, 1065, 704 cm<sup>-1</sup>. <sup>1</sup>H-NMR (400 MHz, CDCl<sub>3</sub>)  $\delta$  8.35 (d, *J* = 8.1 Hz, 2H), 7.86 (s, 1H), 7.76 (d, *J* = 8.2 Hz, 2H), 7.69 (s, 1H), 7.57–7.49 (m, 3H),

7.44 (d,  $J = 7.2$  Hz, 1H), 7.34 (s, 1H), 2.50 (s, 3H).  $^{13}\text{C}$ -NMR (150 MHz,  $\text{CDCl}_3$ )  $\delta$  155.1, 149.8, 146.9, 140.6, 139.8, 136.4, 132.4, 132.1, 132.0 (q,  $J = 33.4$  Hz), 129.5, 128.6, 127.7, 125.9 (q,  $J = 3.6$  Hz), 125.1, 124.1 (q,  $J = 272.2$  Hz), 109.5, 105.6, 21.6.  $^{19}\text{F}$ -NMR (376 MHz,  $\text{CDCl}_3$ )  $\delta$  -62.8. HRMS (ESI/[M+H] $^+$ ): calcd for  $\text{C}_{20}\text{H}_{15}\text{F}_3\text{N}_3^+$ : 354.1213; Found 354.1214.

### Methyl 4-(5-(*m*-tolyl)imidazo[1,2-*a*]pyrimidin-7-yl)benzoate (**3d**)

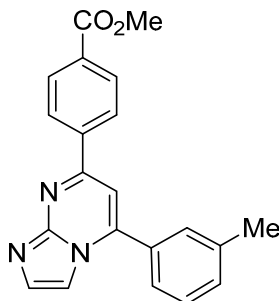

Synthesized according to General Procedure C: Methyl (*E*)-4-(((1*H*-imidazol-2-yl)imino)methyl)benzoate **1d** (69 mg, 0.30 mmol, 1.0 equiv), 2-(dimethyl(oxo)- $\lambda^6$ -sulfanylidene)-1-(*m*-tolyl)ethan-1-one **2a** (95 mg, 0.45 mmol, 1.5 equiv),  $[\text{Cp}^*\text{Rh}(\text{MeCN})_3][\text{SbF}_6]_2$  (25 mg, 0.03 mmol, 0.10 equiv), pivalic acid (61 mg, 0.60 mmol, 2.0 equiv), sodium acetate (25 mg, 0.30 mmol, 1.0 equiv), 3 Å molecular sieves (approximately 70 mg), and 1,4-dioxane (3 mL). The reaction mixture was stirred at 100 °C. Purification by silica gel column chromatography (40% acetone/hexanes) afforded **3d** (76 mg, 74%) as an orange solid. FTIR (neat) 1720, 1612, 1530, 1484, 1435, 1273, 1149, 1140, 1108, 779, 728, 704  $\text{cm}^{-1}$ .  $^1\text{H}$ -NMR (500 MHz,  $\text{CDCl}_3$ )  $\delta$  8.30 (d,  $J = 8.3$  Hz, 2H), 8.16 (d,  $J = 8.4$  Hz, 2H), 7.85 (s, 1H), 7.68 (s, 1H), 7.55–7.49 (m, 3H), 7.43 (d,  $J = 7.4$  Hz, 1H), 7.36 (s, 1H), 3.95 (s, 3H), 2.49 (s, 3H).  $^{13}\text{C}$ -NMR (126 MHz,  $\text{CDCl}_3$ )  $\delta$  166.8, 155.5, 150.0, 146.7, 141.4, 139.7, 136.5, 132.5, 132.1, 131.7, 130.2, 129.5, 128.6, 127.4, 125.1, 109.5, 105.8, 52.4, 21.6. HRMS (ESI/[M+H] $^+$ ): calcd for  $\text{C}_{21}\text{H}_{18}\text{N}_3\text{O}_2^+$ : 344.1394; Found 344.1394.

### 7-(3-Bromophenyl)-5-(*m*-tolyl)imidazo[1,2-*a*]pyrimidine (**3e**)

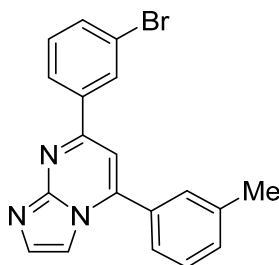

Synthesized according to General Procedure C: (*E*)-1-(3-Bromophenyl)-*N*-(1*H*-imidazol-2-yl)methanimine **1e** (75 mg, 0.30 mmol, 1.0 equiv), 2-(dimethyl(oxo)- $\lambda^6$ -sulfanylidene)-1-(*m*-tolyl)ethan-1-one **2a** (95 mg, 0.45 mmol, 1.5 equiv),  $[\text{Cp}^*\text{Rh}(\text{MeCN})_3][\text{SbF}_6]_2$  (25 mg, 0.03 mmol, 0.10 equiv), pivalic acid (61 mg, 0.60 mmol, 2.0 equiv), sodium acetate (25 mg, 0.30 mmol, 1.0 equiv), 3 Å molecular sieves (approximately 70 mg), and 1,4-dioxane (3 mL). The reaction mixture was stirred at 100 °C. Purification by silica gel column chromatography (40% acetone/hexanes) afforded **3e** (85 mg, 78%) as a yellow solid. FTIR (neat) 1597, 1525, 1504, 1474, 1281, 1267, 1150, 1139, 1072, 907, 847, 770, 725, 702, 690, 674, 644, 609  $\text{cm}^{-1}$ .  $^1\text{H}$ -NMR (500 MHz,  $\text{CDCl}_3$ )  $\delta$  8.39 (s, 1H), 8.14 (d,  $J = 8.0$  Hz, 1H), 7.82 (s, 1H), 7.66 (s, 1H), 7.59 (d,  $J = 8.0$  Hz, 1H), 7.55–

7.48 (m, 3H), 7.43 (d,  $J = 7.5$  Hz, 1H), 7.36 (t,  $J = 7.9$  Hz, 1H), 7.27 (s, 1H).  $^{13}\text{C}$ -NMR (126 MHz,  $\text{CDCl}_3$ )  $\delta$  155.2, 149.9, 146.7, 139.7, 139.3, 136.3, 133.3, 132.5, 132.0, 130.48, 130.46, 129.5, 128.6, 126.0, 125.1, 123.3, 109.4, 105.5, 21.6. HRMS (ESI/[ $\text{M}+\text{H}$ ] $^+$ ): calcd for  $\text{C}_{19}\text{H}_{15}\text{BrN}_3^+$ : 364.0444 and 366.0423; Found 364.0444 and 366.0425.

### 7-(2-Chlorophenyl)-5-(*m*-tolyl)imidazo[1,2-*a*]pyrimidine (3f)

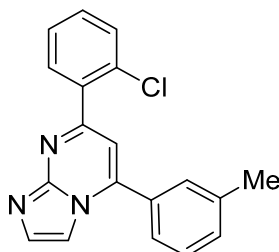

Synthesized according to General Procedure C: (*E*)-1-(2-Chlorophenyl)-*N*-(1*H*-imidazol-2-yl)methanimine **1f** (75 mg, 0.30 mmol, 1.0 equiv), 2-(dimethyl(oxo)- $\lambda^6$ -sulfanylidene)-1-(*m*-tolyl)ethan-1-one **2a** (62 mg, 0.45 mmol, 1.5 equiv), [ $\text{Cp}^*\text{Rh}(\text{MeCN})_3$ ][ $\text{SbF}_6$ ] $_2$  (25 mg, 0.03 mmol, 0.10 equiv), pivalic acid (61 mg, 0.60 mmol, 2.0 equiv), sodium acetate (25 mg, 0.30 mmol, 1.0 equiv), 3Å molecular sieves (approximately 70 mg), and tetrahydrofuran (3 mL). The reaction mixture was stirred at 100 °C. Purification by silica gel column chromatography (40% acetone/hexanes) afforded **3f** (49 mg, 51%) as an orange foam. FTIR (neat) 1613, 1524, 1503, 1475, 1274, 1150, 1139, 1093, 1048, 906, 793, 759, 728, 703, 644, 609  $\text{cm}^{-1}$ .  $^1\text{H}$ -NMR (400 MHz,  $\text{CDCl}_3$ )  $\delta$  7.88–7.85 (m, 2H), 7.72 (d,  $J = 1.6$  Hz, 1H), 7.56–7.53 (m, 2H), 7.51–7.47 (m, 2H), 7.44–7.37 (m, 3H), 7.31 (s, 1H), 2.48 (s, 3H).  $^{13}\text{C}$ -NMR (101 MHz,  $\text{CDCl}_3$ )  $\delta$  157.0, 149.9, 145.3, 139.6, 137.7, 136.0, 132.5, 132.3, 132.1, 132.0, 130.7, 130.4, 129.5, 128.6, 127.4, 125.2, 110.0, 109.3, 21.6. HRMS (ESI/[ $\text{M}+\text{H}$ ] $^+$ ): calcd for  $\text{C}_{19}\text{H}_{15}\text{ClN}_3^+$ : 320.0949; Found 320.0949.

### 7-(Furan-2-yl)-5-(*m*-tolyl)imidazo[1,2-*a*]pyrimidine (3g)

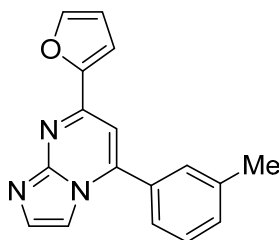

Synthesized according to General Procedure C: (*E*)-1-(Furan-2-yl)-*N*-(1*H*-imidazol-2-yl)methanimine **1h** (48 mg, 0.30 mmol, 1.0 equiv), 2-(dimethyl(oxo)- $\lambda^6$ -sulfanylidene)-1-(*m*-tolyl)ethan-1-one **2a** (62 mg, 0.45 mmol, 1.5 equiv), [ $\text{Cp}^*\text{Rh}(\text{MeCN})_3$ ][ $\text{SbF}_6$ ] $_2$  (25 mg, 0.03 mmol, 0.10 equiv), pivalic acid (61 mg, 0.60 mmol, 2.0 equiv), sodium acetate (25 mg, 0.30 mmol, 1.0 equiv), 3Å molecular sieves (approximately 70 mg), and 1,4-dioxane (3 mL). The reaction mixture was stirred at 100 °C. Purification by silica gel column chromatography (40% acetone/hexanes) afforded **3g** (41 mg, 50%) as a brown oil. FTIR (neat) 1615, 1593, 1522, 1477, 1279, 1223, 1151, 1139, 1093, 1015, 908, 884, 790, 727, 700, 635  $\text{cm}^{-1}$ .  $^1\text{H}$ -NMR (400 MHz,  $\text{CDCl}_3$ )  $\delta$  7.77 (d,  $J = 1.5$  Hz, 1H), 7.62 (d,  $J = 1.5$  Hz, 1H), 7.59 (d,  $J = 0.9$  Hz, 1H), 7.54–7.46 (m, 3H), 7.43–7.38 (m, 2H), 7.30 (s, 1H), 6.60 (dd,  $J = 3.5; 1.7$  Hz, 1H), 2.48 (s, 3H).  $^{13}\text{C}$ -NMR (101 MHz,  $\text{CDCl}_3$ )  $\delta$

152.5, 149.8, 148.8, 146.5, 144.7, 139.6, 135.9, 132.5, 131.9, 129.4, 128.6, 125.1, 113.0, 111.9, 109.4, 104.4, 21.6. HRMS (ESI/[M+H]<sup>+</sup>): calcd for C<sub>17</sub>H<sub>14</sub>N<sub>3</sub>O<sup>+</sup>: 276.1131; Found 276.1133.

### 2-Phenyl-4-(*m*-tolyl)pyrimido[1,2-*b*]indazole (3h)

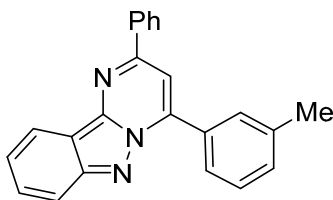

Synthesized according to General Procedure C: (*E*)-*N*-(2*H*-Indazol-3-yl)-1-phenylmethanimine **1j** (66 mg, 0.30 mmol, 1.0 equiv), 2-(dimethyl(oxo)-λ<sup>6</sup>-sulfanylidene)-1-(*m*-tolyl)ethan-1-one **2a** (62 mg, 0.45 mmol, 1.5 equiv), [Cp\**Rh*(MeCN)<sub>3</sub>][SbF<sub>6</sub>]<sub>2</sub> (25 mg, 0.03 mmol, 0.10 equiv), pivalic acid (61 mg, 0.60 mmol, 2.0 equiv), sodium acetate (25 mg, 0.30 mmol, 1.0 equiv), 3 Å molecular sieves (approximately 70 mg), and 1,4-dioxane (3 mL). The reaction mixture was stirred at 100 °C. Purification by silica gel column chromatography (20% acetone/hexanes) afforded **3h** (81 mg, 81%) as a yellow solid. FTIR (neat) 1634, 1581, 1540, 1484, 1461, 1358, 1187, 1161, 1136, 1119, 907, 857, 767, 752, 728, 689, 642, 633, 616, 579, 478, 440 cm<sup>-1</sup>. <sup>1</sup>H-NMR (600 MHz, CDCl<sub>3</sub>) δ 8.43 (d, *J* = 8.2 Hz, 1H), 8.29 (d, *J* = 7.1 Hz, 2H), 8.01–7.99 (m, 2H), 7.87 (d, *J* = 8.6 Hz, 1H), 7.73 (s, 1H), 7.62 (ddd, *J* = 8.3; 6.6; 1.1 Hz, 1H), 7.57 (t, *J* = 7.5 Hz, 2H), 7.50–7.55 (m, 2H), 7.43 (d, *J* = 7.6 Hz, 1H), 7.33–7.30 (m, 1H), 2.53 (s, 3H). <sup>13</sup>C-NMR (150 MHz, CDCl<sub>3</sub>) δ 152.7, 151.7, 145.7, 145.1, 138.8, 137.5, 132.0, 131.9, 130.3, 130.0, 129.9, 129.2, 128.9, 127.3, 126.8, 121.4, 120.8, 116.8, 114.0, 108.8, 21.8. HRMS (ESI/[M+H]<sup>+</sup>): calcd for C<sub>23</sub>H<sub>18</sub>N<sub>3</sub><sup>+</sup>: 336.1495; Found 336.1495.

### 3,5-Diphenyl-7-(*m*-tolyl)pyrazolo[1,5-*a*]pyrimidine (3i)

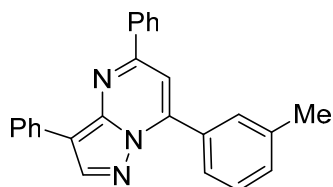

Synthesized according to General Procedure C: (*E*)-1-Phenyl-*N*-(4-phenyl-1*H*-pyrazol-5-yl)methanimine **1l** (74 mg, 0.30 mmol, 1.0 equiv), 2-(dimethyl(oxo)-λ<sup>6</sup>-sulfanylidene)-1-(*m*-tolyl)ethan-1-one **2a** (62 mg, 0.45 mmol, 1.5 equiv), [Cp\**Rh*(MeCN)<sub>3</sub>][SbF<sub>6</sub>]<sub>2</sub> (25 mg, 0.03 mmol, 0.10 equiv), pivalic acid (61 mg, 0.60 mmol, 2.0 equiv), sodium acetate (25 mg, 0.30 mmol, 1.0 equiv), 3 Å molecular sieves (approximately 70 mg), and 1,4-dioxane (3 mL). The reaction mixture was stirred at 100 °C. Purification by silica gel column chromatography (20% acetone/hexanes) afforded **3i** (96 mg, 88%) as a yellow solid. FTIR (neat) 1606, 1583, 1561, 1521, 1489, 1369, 1247, 1189, 907, 880, 847, 788, 764, 728, 691, 663, 648, 602 cm<sup>-1</sup>. <sup>1</sup>H-NMR (600 MHz, CDCl<sub>3</sub>) δ 8.50 (s, 1H), 8.26–8.23 (m, 4H), 7.88–7.85 (m, 2H), 7.56 (t, *J* = 7.2 Hz, 2H), 7.54–7.49 (m, 4H), 7.42 (d, *J* = 7.6 Hz, 1H), 7.38 (s, 1H), 7.33–7.92 (m, 1H), 2.51 (s, 3H). <sup>13</sup>C-NMR (150 MHz, CDCl<sub>3</sub>) δ 156.0, 147.3, 146.0, 143.0, 138.7, 137.5, 132.6, 131.9, 131.5, 130.5, 129.8, 129.0, 128.84, 128.77, 127.5, 126.5, 126.4, 126.2, 110.7, 105.3, 21.7. HRMS (ESI/[M+H]<sup>+</sup>): calcd for C<sub>25</sub>H<sub>20</sub>N<sub>3</sub><sup>+</sup>: 362.1652; Found 362.1653.

### 2-(*tert*-Butyl)-5-phenyl-7-(*m*-tolyl)pyrazolo[1,5-*a*]pyrimidine (**3j**)

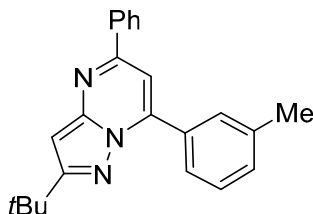

Synthesized according to General Procedure C: (*E*)-*N*-(3-(*tert*-Butyl)-1*H*-pyrazol-5-yl)-1-phenylmethanimine **1k** (73 mg, 94% mass purity, 0.30 mmol, 1.0 equiv), 2-(dimethyl(oxo)- $\lambda^6$ -sulfanylidene)-1-(*m*-tolyl)ethan-1-one **2a** (62 mg, 0.45 mmol, 1.5 equiv), [Cp\**Rh*(MeCN)<sub>3</sub>][SbF<sub>6</sub>]<sub>2</sub> (25 mg, 0.03 mmol, 0.10 equiv), pivalic acid (123 mg, 1.20 mmol, 4.0 equiv), sodium acetate (25 mg, 0.30 mmol, 1.0 equiv), 3Å molecular sieves (approximately 70 mg), and 1,4-dioxane (3 mL). The reaction mixture was stirred at 120 °C. Purification by silica gel column chromatography (20% acetone/hexanes) afforded **3j** (59 mg, 57%) as a yellow oil. FTIR (neat) 1599, 1583, 1551, 1510, 1485, 1459, 1363, 1240, 1151, 770, 734, 692, 627 cm<sup>-1</sup>. <sup>1</sup>H-NMR (600 MHz, CDCl<sub>3</sub>)  $\delta$  8.12 (dd, *J* = 8.3; 1.5 Hz, 2H), 8.05 (d, *J* = 7.8 Hz, 1H), 8.01 (s, 1H), 7.52 (t, *J* = 7.4 Hz, 2H), 7.50–7.44 (m, 2H), 7.39–7.37 (m, 1H), 7.30 (s, 1H), 6.64 (s, 1H), 2.49 (s, 3H), 1.44 (s, 9H). <sup>13</sup>C-NMR (150 MHz, CDCl<sub>3</sub>)  $\delta$  168.1, 155.6, 150.6, 146.3, 138.2, 138.1, 131.8, 131.7, 130.2, 130.1, 129.0, 128.4, 127.3, 126.8, 104.2, 93.2, 33.2, 30.6, 21.7. HRMS (ESI/[M+H]<sup>+</sup>): calcd for C<sub>23</sub>H<sub>24</sub>N<sub>3</sub><sup>+</sup>: 342.1965; Found 342.1963.

### 5-(4-Methoxyphenyl)-7-phenylimidazo[1,2-*a*]pyrimidine (**3k**)

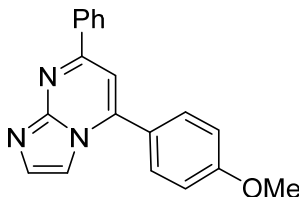

Synthesized according to General Procedure C: (*E*)-*N*-(1*H*-imidazol-2-yl)-1-phenylmethanimine **1a** (51 mg, 0.30 mmol, 1.0 equiv), 2-(dimethyl(oxo)- $\lambda^6$ -sulfanylidene)-1-(4-methoxyphenyl)ethan-1-one **2b** (102 mg, 0.45 mmol, 1.5 equiv), [Cp\**Rh*(MeCN)<sub>3</sub>][SbF<sub>6</sub>]<sub>2</sub> (25 mg, 0.03 mmol, 0.10 equiv), pivalic acid (61 mg, 0.60 mmol, 2.0 equiv), sodium acetate (25 mg, 0.30 mmol, 1.0 equiv), 3Å molecular sieves (approximately 70 mg), and 1,4-dioxane (3 mL). The reaction mixture was stirred at 100 °C. Purification by silica gel column chromatography (40% acetone/hexanes) afforded **3k** (70 mg, 78%) as a yellow solid. FTIR (neat) 1607, 1533, 1510, 1501, 1491, 1464, 1440, 1296, 1254, 1180, 1161, 1141, 1027, 908, 834, 779, 766, 730, 689, 646, 637, 576 cm<sup>-1</sup>. <sup>1</sup>H-NMR (400 MHz, CDCl<sub>3</sub>)  $\delta$  8.20 (dd, *J* = 7.8; 1.9 Hz, 2H), 7.78 (s, 1H), 7.70–7.64 (m, 3H), 7.51–7.45 (m, 3H), 7.27 (s, 1H), 7.10 (d, *J* = 8.7 Hz, 2H), 3.91 (s, 3H). <sup>13</sup>C-NMR (101 MHz, CDCl<sub>3</sub>)  $\delta$  161.7, 156.9, 150.2, 146.2, 137.4, 135.8, 130.4, 129.6, 128.9, 127.4, 124.9, 114.9, 109.0, 105.4, 55.7. HRMS (ESI/[M+H]<sup>+</sup>): calcd for C<sub>19</sub>H<sub>16</sub>N<sub>3</sub>O<sup>+</sup>: 302.1288; Found 302.1288.



### 7-Phenyl-5-(4-(trifluoromethyl)phenyl)imidazo[1,2-*a*]pyrimidine (**3l**)

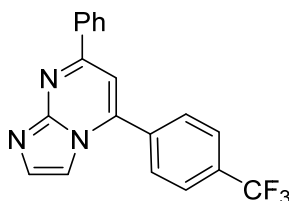

Synthesized according to General Procedure C: (*E*)-*N*-(1*H*-Imidazol-2-yl)-1-phenylmethanimine **1a** (51 mg, 0.30 mmol, 1.0 equiv), 2-(dimethyl(oxo)- $\lambda^6$ -sulfanylidene)-1-(4-(trifluoromethyl)phenyl)ethan-1-one **2c** (119 mg, 0.45 mmol, 1.5 equiv), [Cp\**Rh*(MeCN)<sub>3</sub>][SbF<sub>6</sub>]<sub>2</sub> (25 mg, 0.03 mmol, 0.10 equiv), pivalic acid (61 mg, 0.60 mmol, 2.0 equiv), sodium acetate (25 mg, 0.30 mmol, 1.0 equiv), 3Å molecular sieves (approximately 70 mg), and 1,4-dioxane (3 mL). The reaction mixture was stirred at 100 °C. Purification by silica gel column chromatography (40% acetone/hexanes) afforded **3l** (42 mg, 41%) as a yellow solid. FTIR (neat) 1610, 1533, 1324, 1271, 1169, 1128, 1065, 1019, 845, 766, 689 cm<sup>-1</sup>. <sup>1</sup>H-NMR (400 MHz, CDCl<sub>3</sub>)  $\delta$  8.23–8.19 (m, 2H), 7.93–7.87 (m, 4H), 7.83 (d, *J* = 1.5 Hz, 1H), 7.57 (d, *J* = 1.5 Hz, 1H), 7.53–7.49 (m, 3H), 7.35 (s, 1H). <sup>13</sup>C-NMR (101 MHz, CDCl<sub>3</sub>)  $\delta$  156.9, 150.0, 144.6, 137.0, 136.4, 136.2, 133.2 (d, *J* = 33.0 Hz), 130.8, 129.1, 128.7, 127.5, 126.7 (q, *J* = 3.7 Hz), 123.6 (d, *J* = 272.5 Hz), 108.9, 106.2. <sup>19</sup>F-NMR (376 MHz, CDCl<sub>3</sub>)  $\delta$  -63.0. HRMS (ESI/[M+H]<sup>+</sup>): calcd for C<sub>19</sub>H<sub>13</sub>F<sub>3</sub>N<sub>3</sub><sup>+</sup>: 340.1056; Found 340.1056.

### 5-(4-Bromophenyl)-7-phenylimidazo[1,2-*a*]pyrimidine (**3m**)

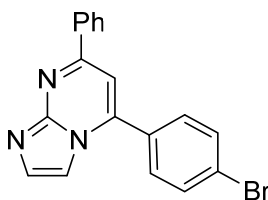

Synthesized according to General Procedure C: (*E*)-*N*-(1*H*-Imidazol-2-yl)-1-phenylmethanimine **1a** (51 mg, 0.30 mmol, 1.0 equiv), 1-(4-bromophenyl)-2-(dimethyl(oxo)- $\lambda^6$ -sulfanylidene)ethan-1-one **2d** (124 mg, 0.45 mmol, 1.5 equiv), [Cp\**Rh*(MeCN)<sub>3</sub>][SbF<sub>6</sub>]<sub>2</sub> (25 mg, 0.03 mmol, 0.10 equiv), pivalic acid (61 mg, 0.60 mmol, 2.0 equiv), sodium acetate (25 mg, 0.30 mmol, 1.0 equiv), 3Å molecular sieves (approximately 70 mg), and tetrahydrofuran (3 mL). The reaction mixture was stirred at 100 °C. Purification by silica gel column chromatography (40% acetone/hexanes) afforded **3m** (76 mg, 73%) as a yellow solid. FTIR (neat) 1612, 1588, 1527, 1482, 1382, 1352, 1272, 1156, 1141, 1069, 1011, 906, 827, 778, 765, 726, 696, 643 cm<sup>-1</sup>. <sup>1</sup>H-NMR (600 MHz, CDCl<sub>3</sub>)  $\delta$  8.18 (dd, *J* = 7.8; 1.8 Hz, 2H), 7.80 (s, 1H), 7.70–7.74 (m, 2H), 7.63–7.60 (m, 2H), 7.56 (d, *J* = 1.5 Hz, 1H), 7.51–7.46 (m, 3H), 7.29 (s, 1H). <sup>13</sup>C-NMR (150 MHz, CDCl<sub>3</sub>)  $\delta$  156.9, 150.0, 145.0, 137.0, 136.1, 132.9, 131.5, 130.6, 129.6, 129.0, 127.4, 125.6, 108.9, 105.8. HRMS (ESI/[M+H]<sup>+</sup>): calcd for C<sub>18</sub>H<sub>13</sub>BrN<sub>3</sub><sup>+</sup>: 350.0287 and 352.0267; Found 350.0287 and 352.0267.

### 7-Phenyl-5-(thiophen-2-yl)imidazo[1,2-a]pyrimidine (**3n**)

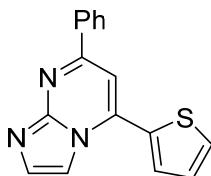

Synthesized according to General Procedure C: (*E*)-*N*-(1*H*-Imidazol-2-yl)-1-phenylmethanimine **1a** (51 mg, 0.30 mmol, 1.0 equiv), 2-(dimethyl(oxo)- $\lambda^6$ -sulfanylidene)-1-(thiophen-2-yl)ethan-1-one **2e** (91 mg, 0.45 mmol, 1.5 equiv), [Cp\**Rh*(MeCN)<sub>3</sub>][SbF<sub>6</sub>]<sub>2</sub> (25 mg, 0.03 mmol, 0.10 equiv), pivalic acid (61 mg, 0.60 mmol, 2.0 equiv), sodium acetate (25 mg, 0.30 mmol, 1.0 equiv), 3Å molecular sieves (approximately 70 mg), and 1,4-dioxane (3 mL). The reaction mixture was stirred at 100 °C. Purification by silica gel column chromatography (40% acetone/hexanes) afforded **3n** (64 mg, 76%) as a yellow solid. FTIR (neat) 1603, 1581, 1531, 1491, 1469, 1428, 1396, 1377, 1359, 1291, 1271, 1243, 1147, 909, 856, 776, 763, 696, 656 cm<sup>-1</sup>. <sup>1</sup>H-NMR (400 MHz, CDCl<sub>3</sub>)  $\delta$  8.21 (dd, *J* = 7.8; 1.9 Hz, 2H), 7.98 (d, *J* = 1.6 Hz, 1H), 7.87 (d, *J* = 1.6 Hz, 1H), 7.76 (dd, *J* = 3.7; 1.2 Hz, 1H), 7.65 (dd, *J* = 5.1, 1.2 Hz, 1H), 7.53–7.46 (m, 4H), 7.30 (dd, *J* = 5.1; 3.7 Hz, 1H). <sup>13</sup>C-NMR (101 MHz, CDCl<sub>3</sub>)  $\delta$  156.6, 150.3, 139.7, 137.1, 136.3, 133.6, 130.6, 129.35, 129.34, 129.0, 128.5, 127.5, 109.5, 105.6. HRMS (ESI/[M+H]<sup>+</sup>): calcd for C<sub>16</sub>H<sub>12</sub>N<sub>3</sub>S<sup>+</sup>: 278.0746; Found 278.0748.

### 5-Isopropyl-7-phenylimidazo[1,2-a]pyrimidine (**3o**)

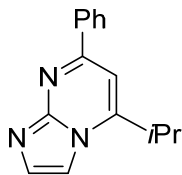

Synthesized according to General Procedure C: (*E*)-*N*-(1*H*-Imidazol-2-yl)-1-phenylmethanimine **1a** (51 mg, 0.30 mmol, 1.0 equiv), 1-(dimethyl(oxo)- $\lambda^6$ -sulfanylidene)-3-methylbutan-2-one **2f** (73 mg, 0.45 mmol, 1.5 equiv), [Cp\**Rh*(MeCN)<sub>3</sub>][SbF<sub>6</sub>]<sub>2</sub> (25 mg, 0.03 mmol, 0.10 equiv), pivalic acid (61 mg, 0.60 mmol, 2.0 equiv), sodium acetate (25 mg, 0.30 mmol, 1.0 equiv), 3Å molecular sieves (approximately 70 mg), and 1,4-dioxane (3 mL). The reaction mixture was stirred at 100 °C. Purification by silica gel column chromatography (40% acetone/hexanes) afforded **3o** (49 mg, 69%) as a colorless oil. FTIR (neat) 1614, 1528, 1508, 1495, 1465, 1406, 1347, 1271, 1248, 1145, 911, 782, 766, 729, 689 cm<sup>-1</sup>. <sup>1</sup>H-NMR (400 MHz, CDCl<sub>3</sub>)  $\delta$  8.18 (dd, *J* = 8.0; 1.7 Hz, 2H), 7.84 (d, *J* = 1.5 Hz, 1H), 7.53 (d, *J* = 1.5 Hz, 1H), 7.52–7.44 (m, 3H), 7.20 (s, 1H), 3.30 (hept, *J* = 6.9 Hz, 1H), 1.48 (d, *J* = 6.9 Hz, 6H). <sup>13</sup>C-NMR (126 MHz, CDCl<sub>3</sub>)  $\delta$  157.1, 153.1, 149.9, 137.6, 135.8, 130.4, 128.9, 127.5, 107.7, 101.4, 30.5, 19.9. HRMS (ESI/[M+H]<sup>+</sup>): calcd for C<sub>15</sub>H<sub>16</sub>N<sub>3</sub><sup>+</sup>: 238.1339; Found 238.1342.

### 5-Methyl-7-phenylimidazo[1,2-a]pyrimidine (**3p**)

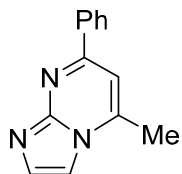

Synthesized according to General Procedure C: (*E*)-*N*-(1*H*-Imidazol-2-yl)-1-phenylmethanimine **1a** (51 mg, 0.30 mmol, 1.0 equiv), 1-(dimethyl(oxo)- $\lambda^6$ -sulfanylidene)propan-2-one **2g** (60 mg, 0.45 mmol, 1.5 equiv), [Cp\*Rh(MeCN)<sub>3</sub>][SbF<sub>6</sub>]<sub>2</sub> (25 mg, 0.03 mmol, 0.10 equiv), pivalic acid (61 mg, 0.60 mmol, 2.0 equiv), sodium acetate (25 mg, 0.30 mmol, 1.0 equiv), 3Å molecular sieves (approximately 70 mg), and 1,4-dioxane (3 mL). The reaction mixture was stirred at 100 °C. Purification by silica gel column chromatography (40% acetone/hexanes) afforded **3p** (32 mg, 51%) as a yellow solid. FTIR (neat) 1620, 1530, 1506, 1496, 1467, 1450, 1370, 1349, 1289, 1273, 1146, 908, 781, 762, 725, 693, 650 cm<sup>-1</sup>. <sup>1</sup>H-NMR (600 MHz, CDCl<sub>3</sub>)  $\delta$  8.18–8.15 (m, 2H), 7.83 (d, *J* = 1.4 Hz, 1H), 7.50–7.45 (m, 3H), 7.43 (d, *J* = 1.4 Hz, 1H), 7.18 (s, 1H), 2.68 (s, 3H). <sup>13</sup>C-NMR (150 MHz, CDCl<sub>3</sub>)  $\delta$  156.6, 149.7, 143.5, 137.3, 136.0, 130.4, 128.9, 127.4, 107.7, 105.5, 18.8. HRMS (ESI/[M+H]<sup>+</sup>): calcd for C<sub>13</sub>H<sub>12</sub>N<sub>3</sub><sup>+</sup>: 210.1026; Found 210.1029.

### *tert*-Butyl 4-(7-phenylimidazo[1,2-*a*]pyrimidin-5-yl)piperidine-1-carboxylate (**3q**)

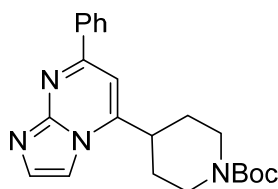

Synthesized according to General Procedure C: (*E*)-*N*-(1*H*-Imidazol-2-yl)-1-phenylmethanimine **1a** (51 mg, 0.30 mmol, 1.0 equiv), *tert*-butyl 4-(2-(dimethyl(oxo)- $\lambda^6$ -sulfanylidene)acetyl)piperidine-1-carboxylate **2h** (137 mg, 0.45 mmol, 1.5 equiv), [Cp\*Rh(MeCN)<sub>3</sub>][SbF<sub>6</sub>]<sub>2</sub> (25 mg, 0.03 mmol, 0.10 equiv), pivalic acid (61 mg, 0.60 mmol, 2.0 equiv), sodium acetate (25 mg, 0.30 mmol, 1.0 equiv), 3Å molecular sieves (approximately 70 mg), and tetrahydrofuran (3 mL). The reaction mixture was stirred at 100 °C. Purification by silica gel column chromatography (40% acetone/hexanes) afforded **3q** (84 mg, 74%) as a yellow solid. FTIR (neat) 1683, 1616, 1528, 1451, 1424, 1366, 1273, 1235, 1166, 1131, 1118, 912, 766, 731, 696 cm<sup>-1</sup>. <sup>1</sup>H-NMR (600 MHz, CDCl<sub>3</sub>)  $\delta$  8.16 (dt, *J* = 7.8; 1.5 Hz, 2H), 7.84 (s, 1H), 7.54 (s, 1H), 7.51–7.46 (m, 3H), 7.16 (d, *J* = 2.3 Hz, 1H), 4.38 (br s, 2H), 3.08 (tt, *J* = 12.0; 3.4 Hz, 1H), 2.94 (s, 2H), 2.16 (apparent d, *J* = 12.6 Hz, 2H), 1.82–1.72 (m, 2H), 1.49 (s, 9H). <sup>13</sup>C-NMR (150 MHz, CDCl<sub>3</sub>)  $\delta$  157.0, 154.7, 150.0, 149.9, 137.4, 136.2, 130.5, 129.0, 127.5, 107.4, 102.0, 80.2, 43.9 (br), 38.9, 29.4, 28.6. HRMS (ESI/[M+H]<sup>+</sup>): calcd for C<sub>22</sub>H<sub>27</sub>N<sub>4</sub>O<sub>2</sub><sup>+</sup>: 379.2129; Found 379.2129.

### 7-(4-Methoxyphenyl)-3,5-diphenylpyrazolo[1,5-*a*]pyrimidine (**3r**)

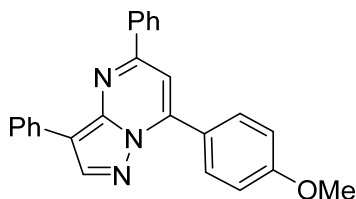

Synthesized according to General Procedure C: (*E*)-1-Phenyl-*N*-(4-phenyl-1*H*-pyrazol-5-yl)methanimine **1l** (74 mg, 0.30 mmol, 1.0 equiv), 2-(dimethyl(oxo)- $\lambda^6$ -sulfanylidene)-1-(4-methoxyphenyl)ethan-1-one **2b** (102 mg, 0.45 mmol, 1.5 equiv), [Cp\*Rh(MeCN)<sub>3</sub>][SbF<sub>6</sub>]<sub>2</sub> (25 mg, 0.03 mmol, 0.10 equiv), pivalic acid (61 mg, 0.60 mmol, 2.0 equiv), sodium acetate (25 mg, 0.30 mmol, 1.0 equiv), 3Å molecular sieves (approximately 70 mg), and 1,4-dioxane (3 mL). The reaction mixture was stirred at 100 °C. Purification by silica gel column chromatography (20%

acetone/hexanes) afforded **3r** (97 mg, 85%) as a yellow solid. FTIR (neat) 1606, 1561, 1507, 1494, 1377, 1296, 1258, 1231, 1179, 1028, 907, 828, 765, 729, 709, 692, 668  $\text{cm}^{-1}$ .  $^1\text{H-NMR}$  (600 MHz,  $\text{CDCl}_3$ )  $\delta$  8.49 (s, 1H), 8.26–8.22 (m, 4H), 8.10 (d,  $J = 8.8$  Hz, 2H), 7.58–7.54 (m, 2H), 7.53–7.48 (m, 3H), 7.38 (s, 1H), 7.29 (t,  $J = 7.4$  Hz, 1H), 7.12 (d,  $J = 8.8$  Hz, 2H), 3.92 (s, 3H).  $^{13}\text{C-NMR}$  (150 MHz,  $\text{CDCl}_3$ )  $\delta$  161.9, 156.0, 146.9, 146.2, 143.0, 137.7, 132.7, 131.1, 130.5, 129.1, 128.9, 127.5, 126.5, 126.2, 123.8, 114.3, 110.6, 104.6, 55.7. HRMS (ESI/[ $\text{M}+\text{H}$ ] $^+$ ): calcd for  $\text{C}_{25}\text{H}_{20}\text{N}_3\text{O}^+$ : 378.1601; Found 378.1605.

### 3,5-Diphenyl-7-(4-(trifluoromethyl)phenyl)pyrazolo[1,5-*a*]pyrimidine (**3s**)

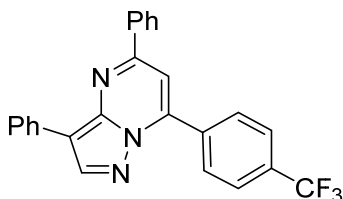

Synthesized according to General Procedure C: (*E*)-1-Phenyl-*N*-(4-phenyl-1*H*-pyrazol-5-yl)methanimine **1l** (74 mg, 0.30 mmol, 1.0 equiv), 2-(dimethyl(oxo)- $\lambda^6$ -sulfanylidene)-1-(4-(trifluoromethyl)phenyl)ethan-1-one **2c** (119 mg, 0.45 mmol, 1.5 equiv), [ $\text{Cp}^*\text{Rh}(\text{MeCN})_3$ ][ $\text{SbF}_6$ ] $_2$  (25 mg, 0.03 mmol, 0.10 equiv), pivalic acid (61 mg, 0.60 mmol, 2.0 equiv), sodium acetate (25 mg, 0.30 mmol, 1.0 equiv), 3Å molecular sieves (approximately 70 mg), and 1,4-dioxane (3 mL). The reaction mixture was stirred at 100 °C. Purification by silica gel column chromatography (20% acetone/hexanes) afforded **3s** (109 mg, 87%) as an orange solid. FTIR (neat) 1608, 1565, 1497, 1376, 1323, 1169, 1126, 1067, 1018, 925, 909, 852, 834, 766, 732, 692, 677  $\text{cm}^{-1}$ .  $^1\text{H-NMR}$  (500 MHz,  $\text{CDCl}_3$ )  $\delta$  8.48 (s, 1H), 8.25–8.18 (m, 6H), 7.87 (d,  $J = 8.1$  Hz, 2H), 7.59–7.53 (m, 3H), 7.51 (t,  $J = 7.6$  Hz, 2H), 7.41 (s, 1H), 7.40–7.29 (m, 1H).  $^{13}\text{C-NMR}$  (126 MHz,  $\text{CDCl}_3$ )  $\delta$  156.0, 146.0, 145.5, 143.3, 137.2, 135.0, 133.0, 132.7, 132.2, 130.8, 129.9, 129.2, 128.9, 127.5, 126.6, 126.5, 125.9 (q,  $J = 3.7$  Hz), 111.3, 105.6.  $^{19}\text{F-NMR}$  (376 MHz,  $\text{CDCl}_3$ )  $\delta$  -63.0. HRMS (ESI/[ $\text{M}+\text{H}$ ] $^+$ ): calcd for  $\text{C}_{25}\text{H}_{17}\text{F}_3\text{N}_3^+$ : 416.1369; Found 416.1368.

### *tert*-Butyl 4-(3,5-diphenylpyrazolo[1,5-*a*]pyrimidin-7-yl)piperidine-1-carboxylate (**3t**)

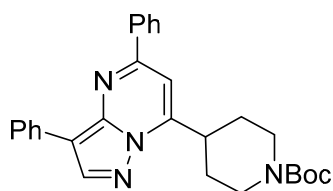

Synthesized according to General Procedure C: (*E*)-1-Phenyl-*N*-(4-phenyl-1*H*-pyrazol-5-yl)methanimine **1l** (74 mg, 0.30 mmol, 1.0 equiv), *tert*-butyl 4-(2-(dimethyl(oxo)- $\lambda^6$ -sulfanylidene)acetyl)piperidine-1-carboxylate **3h** (137 mg, 0.45 mmol, 1.5 equiv), [ $\text{Cp}^*\text{Rh}(\text{MeCN})_3$ ][ $\text{SbF}_6$ ] $_2$  (25 mg, 0.03 mmol, 0.10 equiv), pivalic acid (61 mg, 0.60 mmol, 2.0 equiv), sodium acetate (25 mg, 0.30 mmol, 1.0 equiv), 3Å molecular sieves (approximately 70 mg), and 1,4-dioxane (3 mL). The reaction mixture was stirred at 100 °C. Purification by silica gel column chromatography (20% acetone/hexanes) afforded **3t** (102 mg, 75%) as a yellow solid. FTIR (neat) 1687, 1613, 1566, 1523, 1449, 1425, 1388, 1366, 1295, 1276, 1235, 1167, 1125, 946, 767, 732, 693  $\text{cm}^{-1}$ .  $^1\text{H-NMR}$  (600 MHz,  $\text{CDCl}_3$ )  $\delta$  8.45 (s, 1H), 8.20–8.17 (m, 4H), 7.56–7.47 (m, 5H), 7.28 (tt,  $J = 7.3$ ; 1.3 Hz, 1H), 7.14 (s, 1H), 4.37 (br s, 2H), 3.80 (tt,  $J = 12.2$ ; 3.4 Hz, 1H),

3.00 (br s, 2H), 2.28–2.23 (m, 2H), 1.78 (br s, 2H), 1.51 (s, 9H).  $^{13}\text{C}$ -NMR (150 MHz,  $\text{CDCl}_3$ )  $\delta$  156.1, 154.8, 152.3, 145.2, 142.5, 137.6, 132.5, 130.5, 129.1, 128.9, 127.5, 126.4, 126.2, 110.9, 101.6, 79.9, 44.0 (br), 36.8, 29.5, 28.6. HRMS (ESI/[M+H] $^+$ ): calcd for  $\text{C}_{28}\text{H}_{31}\text{N}_4\text{O}_2^+$ : 455.2442; Found 455.2442.

## 6. Synthesis and Characterization of Heterocycles 5

### General Procedure D: Rh(III)-catalyzed coupling of imines with diazoketones

To a flame-dried microwave tube in a glove box was added the imine (**1**, 1.0 equiv), the diazoketone (**4**, 1.5 equiv), [Cp\*Rh(MeCN)<sub>3</sub>][SbF<sub>6</sub>]<sub>2</sub> (0.1 equiv), pivalic acid (2.0-4.0 equiv), sodium acetate (1.0 equiv), 3Å molecular sieves and 1,4-dioxane (0.1 M). The tube was capped, and the reaction mixture was stirred at the indicated temperature for 16 h. The reaction mixture was cooled to ambient temperature and the solvent was removed *in vacuo*. The crude reaction mixture was subjected to silica gel column chromatography to yield the product.

### Ethyl 5-methyl-7-phenylimidazo[1,2-*a*]pyrimidine-6-carboxylate (**5a**)

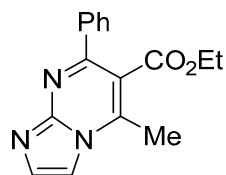

Synthesized according to General Procedure D: (*E*)-*N*-(1*H*-Imidazol-2-yl)-1-phenylmethanimine **1a** (51 mg, 0.30 mmol, 1.0 equiv), ethyl diazoacetoacetate **4** (62  $\mu$ L, 0.45 mmol, 1.5 equiv), [Cp\*Rh(MeCN)<sub>3</sub>][SbF<sub>6</sub>]<sub>2</sub> (25 mg, 0.03 mmol, 0.10 equiv), pivalic acid (61 mg, 0.60 mmol, 2.0 equiv), sodium acetate (25 mg, 0.30 mmol, 1.0 equiv), 3Å molecular sieves (approximately 70 mg), and 1,4-dioxane (3 mL). The reaction mixture was stirred at 100 °C. Purification by silica gel column chromatography (40% acetone/hexanes) afforded **5a** (67 mg, 79%) as a brown oil. FTIR (neat) 1716, 1607, 1503, 1292, 1202, 1144, 1056 cm<sup>-1</sup>. <sup>1</sup>H-NMR (600 MHz, (CD<sub>3</sub>)<sub>2</sub>CO)  $\delta$  7.93 (d, *J* = 1.5 Hz, 1H), 7.85 (d, *J* = 1.5 Hz, 1H), 7.69–7.64 (m, 2H), 7.53–7.47 (m, 3H), 4.16 (q, *J* = 7.1 Hz, 2H), 2.85 (s, 3H), 1.00 (t, *J* = 7.1 Hz, 3H). <sup>13</sup>C-NMR (150 MHz, (CD<sub>3</sub>)<sub>2</sub>CO)  $\delta$  167.6, 156.9, 148.4, 145.6, 140.3, 137.3, 130.1, 129.2, 128.9, 115.7, 110.6, 62.5, 16.6, 13.8. HRMS (ESI/[M+H]<sup>+</sup>): calcd for C<sub>16</sub>H<sub>16</sub>N<sub>3</sub>O<sub>2</sub><sup>+</sup>: 282.1237; Found 282.1237.

### Ethyl 7-(4-methoxyphenyl)-5-methylimidazo[1,2-*a*]pyrimidine-6-carboxylate (**5b**)

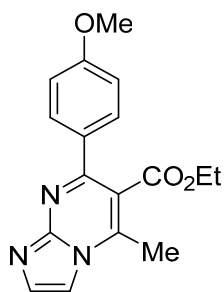

Synthesized according to General Procedure D: (*E*)-*N*-(1*H*-Imidazol-2-yl)-1-(4-methoxyphenyl)methanimine **1b** (60 mg, 0.30 mmol, 1.0 equiv), ethyl diazoacetoacetate **4** (62  $\mu$ L, 0.45 mmol, 1.5 equiv), [Cp\*Rh(MeCN)<sub>3</sub>][SbF<sub>6</sub>]<sub>2</sub> (25 mg, 0.03 mmol, 0.10 equiv), pivalic acid (61 mg, 0.60 mmol, 2.0 equiv), sodium acetate (25 mg, 0.30 mmol, 1.0 equiv), 3Å molecular sieves (approximately 70 mg), and 1,4-dioxane (3 mL). The reaction mixture was stirred at 100 °C. Purification by silica gel column chromatography (40% acetone/hexanes) afforded **5b** (68 mg, 73%) as a yellow oil. FTIR (neat) 1717, 1600, 1502, 1289, 1248, 1175 cm<sup>-1</sup>. <sup>1</sup>H-NMR (600 MHz, (CD<sub>3</sub>)<sub>2</sub>CO)  $\delta$  7.88 (s, 1H), 7.81 (s, 1H), 7.65 (d, *J* = 8.2 Hz, 2H), 7.06 (d, *J* = 8.2 Hz, 2H), 4.22 (q, *J* = 7.2 Hz, 2H), 3.87 (s, 3H), 2.82 (s, 3H), 1.09 (t, *J* = 7.2 Hz, 3H). <sup>13</sup>C-NMR (150 MHz,

(CD<sub>3</sub>)<sub>2</sub>CO)  $\delta$  167.8, 161.8, 156.3, 148.6, 145.2, 137.1, 132.4, 130.5, 115.6, 114.6, 110.3, 62.6, 55.8, 16.5, 14.0. HRMS (ESI/[M+H]<sup>+</sup>): calcd for C<sub>17</sub>H<sub>18</sub>N<sub>3</sub>O<sub>3</sub><sup>+</sup>: 312.1343; Found 312.1345.

### Ethyl 5-methyl-7-(4-(trifluoromethyl)phenyl)imidazo[1,2-*a*]pyrimidine-6-carboxylate (**5c**)

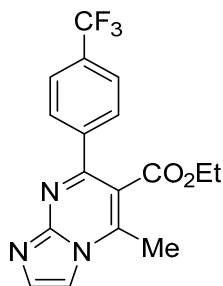

Synthesized according to General Procedure D: (*E*)-*N*-(1*H*-imidazol-2-yl)-1-(4-(trifluoromethyl)phenyl)methanimine **1c** (72 mg, 0.30 mmol, 1.0 equiv), ethyl diazoacetoacetate **4** (62  $\mu$ L, 0.45 mmol, 1.5 equiv), [Cp\**Rh*(MeCN)<sub>3</sub>][SbF<sub>6</sub>]<sub>2</sub> (25 mg, 0.03 mmol, 0.10 equiv), pivalic acid (61 mg, 0.60 mmol, 2.0 equiv), sodium acetate (25 mg, 0.30 mmol, 1.0 equiv), 3 $\text{\AA}$  molecular sieves (approximately 70 mg), and 1,4-dioxane (3 mL). The reaction mixture was stirred at 100  $^{\circ}$ C. Purification by silica gel column chromatography (40% acetone/hexanes) afforded **5c** (92 mg, 88%) as a white solid. FTIR (neat) 1713, 1604, 1503, 1324, 1105 cm<sup>-1</sup>. <sup>1</sup>H-NMR (600 MHz, (CD<sub>3</sub>)<sub>2</sub>CO)  $\delta$  7.99 (s, 1H), 7.89 (m, 5H), 4.18 (q, *J* = 7.1 Hz, 2H), 2.89 (s, 3H), 1.01 (t, *J* = 7.1 Hz, 3H). <sup>13</sup>C-NMR (150 MHz, (CD<sub>3</sub>)<sub>2</sub>CO)  $\delta$  167.2, 155.4, 148.2, 146.4, 144.20 (q, *J* = 1.8 Hz), 137.7, 131.3 (q, *J* = 32.2 Hz), 129.7, 126.2 (q, *J* = 3.8 Hz), 125.2 (q, *J* = 272.1 Hz), 115.4, 111.0, 62.7, 16.7, 13.8. <sup>19</sup>F NMR (376 MHz, (CD<sub>3</sub>)<sub>2</sub>CO):  $\delta$  -63.1. HRMS (ESI/[M+H]<sup>+</sup>): calcd for C<sub>17</sub>H<sub>15</sub>F<sub>3</sub>N<sub>3</sub>O<sub>2</sub><sup>+</sup>: 350.1111; Found 350.1112.

### Ethyl 7-(4-(methoxycarbonyl)phenyl)-5-methylimidazo[1,2-*a*]pyrimidine-6-carboxylate (**5d**)

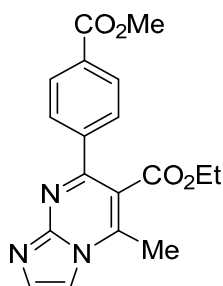

Synthesized according to General Procedure D: Methyl (*E*)-4-(((1*H*-imidazol-2-yl)imino)methyl)benzoate **1d** (69 mg, 0.30 mmol, 1.0 equiv), ethyl diazoacetoacetate **4** (62  $\mu$ L, 0.45 mmol, 1.5 equiv), [Cp\**Rh*(MeCN)<sub>3</sub>][SbF<sub>6</sub>]<sub>2</sub> (25 mg, 0.03 mmol, 0.10 equiv), pivalic acid (61 mg, 0.60 mmol, 2.0 equiv), sodium acetate (25 mg, 0.30 mmol, 1.0 equiv), 3 $\text{\AA}$  molecular sieves (approximately 70 mg), and 1,4-dioxane (3 mL). The reaction mixture was stirred at 100  $^{\circ}$ C. Purification by silica gel column chromatography (25%, then 40% acetone/hexanes) afforded **5d** (77 mg, 75%) as a yellow solid. FTIR (neat) 1717, 1279, 1196, 751 cm<sup>-1</sup>. <sup>1</sup>H-NMR (600 MHz, (CD<sub>3</sub>)<sub>2</sub>CO)  $\delta$  8.15–8.12 (m, 2H), 7.97 (d, *J* = 1.5 Hz, 1H), 7.89 (d, *J* = 1.5 Hz, 1H), 7.80–7.77 (m, 2H), 4.18 (q, *J* = 7.2 Hz, 2H), 3.93 (s, 3H), 2.88 (s, 3H), 1.01 (t, *J* = 7.2 Hz, 3H). <sup>13</sup>C-NMR (150 MHz, (CD<sub>3</sub>)<sub>2</sub>CO)  $\delta$  167.3, 166.8, 155.7, 148.2, 146.2, 144.6, 137.7, 131.6, 120.2, 129.2, 115.4,

110.9, 62.7, 52.5, 16.7, 13.9. HRMS (ESI/[M+H]<sup>+</sup>): calcd for C<sub>18</sub>H<sub>18</sub>N<sub>3</sub>O<sub>4</sub><sup>+</sup>: 340.1292; Found 340.1292.

### Ethyl 7-(3-bromophenyl)-5-methylimidazo[1,2-a]pyrimidine-6-carboxylate (**5e**)

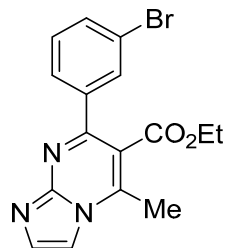

Synthesized according to General Procedure D: (*E*)-1-(3-Bromophenyl)-*N*-(1*H*-imidazol-2-yl)methanimine **1e** (75 mg, 0.30 mmol, 1.0 equiv), ethyl diazoacetoacetate **4** (62 μL, 0.45 mmol, 1.5 equiv), [Cp\**Rh*(MeCN)<sub>3</sub>][SbF<sub>6</sub>]<sub>2</sub> (25 mg, 0.03 mmol, 0.10 equiv), pivalic acid (61 mg, 0.60 mmol, 2.0 equiv), sodium acetate (25 mg, 0.30 mmol, 1.0 equiv), 3 Å molecular sieves (approximately 70 mg), and 1,4-dioxane (3 mL). The reaction mixture was stirred at 100 °C. Purification by silica gel column chromatography (25%, then 40% acetone/hexanes) afforded **5e** (78 mg, 72%) as brown solid. FTIR (neat) 1721, 1504, 1292, 1148, 685 cm<sup>-1</sup>. <sup>1</sup>H-NMR (600 MHz, CDCl<sub>3</sub>) δ 7.89 (bs, 1H), 7.82 (t, *J* = 1.9 Hz, 1H), 7.60–7.50 (m, 3H), 7.28 (t, *J* = 7.9 Hz, 1H), 4.15 (q, *J* = 7.2 Hz, 2H), 2.76 (s, 3H), 1.02 (t, *J* = 7.2 Hz, 3H). <sup>13</sup>C-NMR (150 MHz, CDCl<sub>3</sub>) δ 166.7, 155.2, 147.5, 144.2, 140.7, 137.2, 132.5, 131.3, 130.0, 126.9, 122.5, 115.2, 109.0, 62.4, 16.6, 13.7. HRMS (ESI/[M+H]<sup>+</sup>): calcd for C<sub>16</sub>H<sub>15</sub>BrN<sub>3</sub>O<sub>2</sub><sup>+</sup>: 360.0342 and 362.0322; Found 360.0343 and 362.0323.

### Ethyl 7-(furan-2-yl)-5-methylimidazo[1,2-a]pyrimidine-6-carboxylate (**5f**)

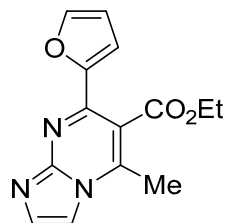

Synthesized according to General Procedure D: (*E*)-1-(Furan-2-yl)-*N*-(1*H*-imidazol-2-yl)methanimine **1h** (48 mg, 0.30 mmol, 1.0 equiv), ethyl diazoacetoacetate **4** (62 μL, 0.45 mmol, 1.5 equiv), [Cp\**Rh*(MeCN)<sub>3</sub>][SbF<sub>6</sub>]<sub>2</sub> (25 mg, 0.03 mmol, 0.10 equiv), pivalic acid (61 mg, 0.60 mmol, 2.0 equiv), sodium acetate (25 mg, 0.30 mmol, 1.0 equiv), 3 Å molecular sieves (approximately 70 mg), and 1,4-dioxane (3 mL). The reaction mixture was stirred at 100 °C. Purification by silica gel column chromatography (30%, then 50% acetone/hexanes) afforded **5f** (63 mg, 77%) as a white solid. FTIR (neat) 1729, 1293, 1180, 739, 720 cm<sup>-1</sup>. <sup>1</sup>H-NMR (600 MHz, (CD<sub>3</sub>)<sub>2</sub>CO) δ 7.89 (d, *J* = 1.5 Hz, 1H), 7.83 (d, *J* = 1.5 Hz, 1H), 7.80 (dd, *J* = 1.8; 0.9 Hz, 1H), 7.26 (dd, *J* = 3.5; 0.8 Hz, 1H), 6.69 (dd, *J* = 3.5; 1.8 Hz, 1H), 4.44 (q, *J* = 7.1 Hz, 2H), 2.77 (s, 3H), 1.31 (t, *J* = 7.1 Hz, 3H). <sup>13</sup>C-NMR (150 MHz, (CD<sub>3</sub>)<sub>2</sub>CO) δ 167.0, 152.8, 148.2, 145.9, 145.0, 144.7, 137.6, 113.6, 113.3, 113.0, 110.8, 62.8, 16.4, 14.4. HRMS (ESI/[M+H]<sup>+</sup>): calcd for C<sub>14</sub>H<sub>14</sub>N<sub>3</sub>O<sub>3</sub><sup>+</sup>: 272.1030; Found 272.1030.



### Ethyl (*E*)-5-methyl-7-styrylimidazo[1,2-*a*]pyrimidine-6-carboxylate (**5g**)

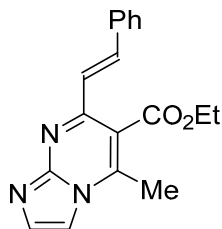

Synthesized according to General Procedure D: (1*E*,2*E*)-*N*-(1*H*-Imidazol-2-yl)-3-phenylprop-2-en-1-imine **1i** (59 mg, 0.30 mmol, 1.0 equiv), ethyl diazoacetoacetate **4** (62  $\mu$ L, 0.45 mmol, 1.5 equiv), [Cp\**Rh*(MeCN)<sub>3</sub>][SbF<sub>6</sub>]<sub>2</sub> (25 mg, 0.03 mmol, 0.10 equiv), pivalic acid (61 mg, 0.60 mmol, 2.0 equiv), sodium acetate (25 mg, 0.30 mmol, 1.0 equiv), 3Å molecular sieves (approximately 70 mg), and 1,4-dioxane (3 mL). The reaction mixture was stirred at 100 °C. Purification by silica gel column chromatography (30%, then 40% acetone/hexanes) afforded **5g** (46 mg, 50%) as a yellow solid. FTIR (neat) 1719, 1600, 1195, 1147, 1060, 687 cm<sup>-1</sup>. <sup>1</sup>H-NMR (600 MHz, (CD<sub>3</sub>)<sub>2</sub>CO)  $\delta$  8.03 (d, *J* = 15.4 Hz, 1H), 7.94–7.88 (m, 2H), 7.71–7.67 (m, 2H), 7.45–7.40 (m, 2H), 7.39–7.32 (m, 2H), 4.56 (q, *J* = 7.1 Hz, 2H), 2.81 (s, 3H), 1.45 (t, *J* = 7.1 Hz, 3H). <sup>13</sup>C-NMR (150 MHz, (CD<sub>3</sub>)<sub>2</sub>CO)  $\delta$  166.9, 152.8, 148.0, 145.5, 138.1, 136.9, 136.1, 130.2, 129.8, 128.6, 123.8, 116.4, 110.9, 63.1, 16.9, 14.5. HRMS (ESI/[M+H]<sup>+</sup>): calcd for C<sub>18</sub>H<sub>18</sub>N<sub>3</sub>O<sub>2</sub><sup>+</sup>: 308.1394; Found 308.1394.

### Ethyl 4-methyl-2-phenylpyrimido[1,2-*b*]indazole-3-carboxylate (**5h**)

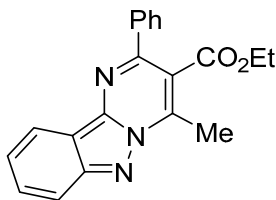

Synthesized according to General Procedure D: (*E*)-*N*-(2*H*-Indazol-3-yl)-1-phenylmethanimine **1j** (66 mg, 0.30 mmol, 1.0 equiv), ethyl diazoacetoacetate **4** (62  $\mu$ L, 0.45 mmol, 1.5 equiv), [Cp\**Rh*(MeCN)<sub>3</sub>][SbF<sub>6</sub>]<sub>2</sub> (25 mg, 0.03 mmol, 0.10 equiv), pivalic acid (61 mg, 0.60 mmol, 2.0 equiv), sodium acetate (25 mg, 0.30 mmol, 1.0 equiv), 3Å molecular sieves (approximately 70 mg), and 1,4-dioxane (3 mL). The reaction mixture was stirred at 100 °C. Purification by silica gel column chromatography (5%, then 10%, then 30% ethyl acetate/hexanes) afforded **5h** (61 mg, 61%) as a yellow crystalline solid. FTIR (neat) 1718, 1634, 1267, 1181, 755 cm<sup>-1</sup>. <sup>1</sup>H-NMR (600 MHz, (CD<sub>3</sub>)<sub>2</sub>CO)  $\delta$  8.28–8.21 (m, 1H), 7.87–7.80 (m, 1H), 7.78 (d, *J* = 7.7 Hz, 2H), 7.69–7.61 (m, 1H), 7.60–7.49 (m, 3H), 7.35–7.26 (m, 1H), 4.26 (q, *J* = 7.5 Hz, 2H), 3.03 (s, 3H), 1.08 (t, *J* = 7.1 Hz, 3H). <sup>13</sup>C-NMR (150 MHz, (CD<sub>3</sub>)<sub>2</sub>CO)  $\delta$  167.1, 152.7, 152.6, 145.4, 143.1, 139.8, 130.9, 130.2, 129.3, 129.2, 121.8, 121.7, 118.7, 117.4, 114.7, 62.9, 15.8, 13.9. HRMS (ESI/[M+H]<sup>+</sup>): calcd for C<sub>20</sub>H<sub>18</sub>N<sub>3</sub>O<sub>2</sub><sup>+</sup>: 332.1394; Found 332.1393.

### Ethyl 2-(*tert*-butyl)-7-methyl-5-phenylpyrazolo[1,5-*a*]pyrimidine-6-carboxylate (**5i**)

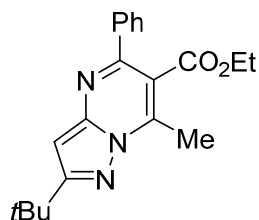

Synthesized according to General Procedure D: (*E*)-*N*-(3-(*tert*-Butyl)-1*H*-pyrazol-5-yl)-1-phenylmethanimine **1k** (73 mg, 94% mass purity, 0.30 mmol, 1.0 equiv), ethyl diazoacetoacetate **4** (62  $\mu$ L, 0.45 mmol, 1.5 equiv), [Cp\**Rh*(MeCN)<sub>3</sub>][SbF<sub>6</sub>]<sub>2</sub> (25 mg, 0.03 mmol, 0.10 equiv), pivalic acid (123 mg, 1.20 mmol, 4.0 equiv), sodium acetate (25 mg, 0.30 mmol, 1.0 equiv), 3Å molecular sieves (approximately 70 mg), and 1,4-dioxane (3 mL). The reaction mixture was stirred at 120 °C. Purification by silica gel column chromatography (2.5%, then 5% ethyl acetate/hexanes) afforded **5i** (43 mg, 43%) as a yellow oil. FTIR (neat) 2962, 1720, 1606, 1290, 1192, 1157, 1053, 781, 696 cm<sup>-1</sup>. <sup>1</sup>H-NMR (600 MHz, CDCl<sub>3</sub>)  $\delta$  7.61–7.55 (m, 2H), 7.46–7.39 (m, 3H), 6.59 (s, 1H), 4.09 (q, *J* = 7.1 Hz, 2H), 2.92 (s, 3H), 1.43 (s, 9H), 0.94 (t, *J* = 7.1 Hz, 3H). <sup>13</sup>C-NMR (150 MHz, CDCl<sub>3</sub>)  $\delta$  169.5, 167.2, 155.8, 148.0, 146.5, 139.7, 129.2, 128.5, 128.0, 113.4, 94.2, 61.9, 33.3, 30.5, 15.1, 13.6. HRMS (ESI/[M+H]<sup>+</sup>): calcd for C<sub>20</sub>H<sub>24</sub>N<sub>3</sub>O<sub>2</sub><sup>+</sup>: 338.1863; Found 338.1863.

### Ethyl 7-methyl-3,5-diphenylpyrazolo[1,5-*a*]pyrimidine-6-carboxylate (**5j**)

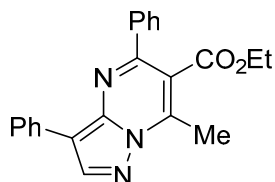

Synthesized according to General Procedure D: (*E*)-1-Phenyl-*N*-(4-phenyl-1*H*-pyrazol-5-yl)methanimine **1l** (74 mg, 0.30 mmol, 1.0 equiv), ethyl diazoacetoacetate **4** (62  $\mu$ L, 0.45 mmol, 1.5 equiv), [Cp\**Rh*(MeCN)<sub>3</sub>][SbF<sub>6</sub>]<sub>2</sub> (25 mg, 0.03 mmol, 0.10 equiv), pivalic acid (123 mg, 1.20 mmol, 4.0 equiv), sodium acetate (25 mg, 0.30 mmol, 1.0 equiv), 3Å molecular sieves (approximately 70 mg), and 1,4-dioxane (3 mL). The reaction mixture was stirred at 120 °C. Purification by silica gel column chromatography (10%, then 20% ethyl acetate/hexanes) afforded **5j** (101 mg, 94%) as a yellow solid. FTIR (neat) 1712, 1601, 1180, 1049, 766, 694 cm<sup>-1</sup>. <sup>1</sup>H-NMR (600 MHz, CDCl<sub>3</sub>)  $\delta$  8.55 (s, 1H), 8.16–8.07 (m, 2H), 7.76–7.68 (m, 2H), 7.51–7.47 (m, 3H), 7.47–7.42 (m, 2H), 7.27 (tt, *J* = 7.3; 1.3 Hz, 1H), 4.16 (q, *J* = 7.2 Hz, 2H), 2.97 (s, 3H), 1.00 (t, *J* = 7.2 Hz, 3H). <sup>13</sup>C-NMR (150 MHz, CDCl<sub>3</sub>)  $\delta$  167.0, 156.1, 146.6, 144.1, 143.7, 139.4, 131.9, 129.6, 128.9, 128.6, 128.3, 126.6, 126.5, 114.6, 111.7, 62.2, 15.1, 13.7. HRMS (ESI/[M+H]<sup>+</sup>): calcd for C<sub>22</sub>H<sub>20</sub>N<sub>3</sub>O<sub>2</sub><sup>+</sup>: 358.1550; Found 358.1550.

## 7. Synthesis and Characterization of Heterocycles 7

### General Procedure E: Rh(III)-catalyzed coupling of imines with alkynes

To a flame-dried microwave tube in a glove box was added the imine (**1**, 1.0 equiv), the alkyne (**6**, 1.5 equiv), [Cp\*Rh(MeCN)<sub>3</sub>][SbF<sub>6</sub>]<sub>2</sub> (0.1 equiv), Cu(OAc)<sub>2</sub>·H<sub>2</sub>O (2.2 equiv), and trifluoroethanol (0.1 M). The tube was capped and the reaction mixture was stirred at the indicated temperature for the indicated amount of time. The reaction mixture was cooled to rt and concentrated. The crude residue was diluted with 28% aq. NH<sub>3</sub> (10 mL) and brine (10 mL) and extracted with CH<sub>2</sub>Cl<sub>2</sub> (4 x 10 mL). The combined organic layers were dried over Na<sub>2</sub>SO<sub>4</sub>, filtered, and concentrated. The product was purified by silica gel column chromatography.

### 5,6-Diethyl-7-phenylimidazo[1,2-*a*]pyrimidine (**7a**)

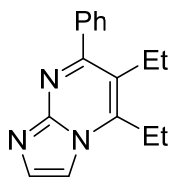

Synthesized according to General Procedure E: (*E*)-*N*-(1*H*-Imidazol-2-yl)-1-phenylmethanimine **1a** (51 mg, 0.30 mmol, 1.0 equiv), 3-hexyne **6a** (51  $\mu$ L, 0.45 mmol, 1.5 equiv), [Cp\*Rh(MeCN)<sub>3</sub>][SbF<sub>6</sub>]<sub>2</sub> (25 mg, 0.03 mmol, 0.10 equiv), Cu(OAc)<sub>2</sub> (120 mg, 0.66 mmol, 2.2 equiv), and trifluoroethanol (3 mL). The reaction mixture was stirred at 60 °C for 16 h. Purification by silica gel column chromatography (50% acetone/hexanes) afforded **7a** (48 mg, 65%) as a white crystalline solid. FTIR (neat) 3105, 2973, 1606, 1505, 1282, 702 cm<sup>-1</sup>. <sup>1</sup>H-NMR (600 MHz, CDCl<sub>3</sub>)  $\delta$  7.89 (bs, 1H), 7.64–7.38 (m, 6H), 3.09 (q, *J* = 7.6 Hz, 2H), 2.70 (q, *J* = 7.6 Hz, 2H), 1.40 (t, *J* = 7.6 Hz, 3H), 1.04 (t, *J* = 7.6 Hz, 3H). <sup>13</sup>C-NMR (150 MHz, CDCl<sub>3</sub>)  $\delta$  161.2, 148.2, 146.0, 139.8, 135.9, 128.6, 128.5, 128.3, 119.8, 107.7, 22.7, 21.3, 15.7, 10.7. HRMS (ESI/[M+H]<sup>+</sup>): calcd for C<sub>16</sub>H<sub>18</sub>N<sub>3</sub><sup>+</sup>: 252.1495; Found 252.1498.

### 5,6-Diethyl-7-(4-methoxyphenyl)imidazo[1,2-*a*]pyrimidine (**7b**)

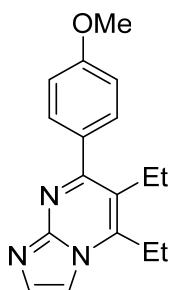

Synthesized according to General Procedure E: (*E*)-*N*-(1*H*-Imidazol-2-yl)-1-(4-methoxyphenyl)methanimine **1b** (60 mg, 0.30 mmol, 1.0 equiv), 3-hexyne **6a** (51  $\mu$ L, 0.45 mmol, 1.5 equiv), [Cp\*Rh(MeCN)<sub>3</sub>][SbF<sub>6</sub>]<sub>2</sub> (25 mg, 0.03 mmol, 0.10 equiv), Cu(OAc)<sub>2</sub> (120 mg, 0.66 mmol, 2.2 equiv), and trifluoroethanol (3 mL). The reaction mixture was stirred at 60 °C for 16 h. Purification by silica gel column chromatography (50%, then 60% acetone/hexanes) afforded **7b** (58 mg, 69%) as a white solid. FTIR (neat) 3125, 2973, 1599, 1244, 1023, 640 cm<sup>-1</sup>. <sup>1</sup>H-NMR (600 MHz, (CD<sub>3</sub>)<sub>2</sub>CO)  $\delta$  7.84 (d, *J* = 1.5 Hz, 1H), 7.71 (d, *J* = 1.5 Hz, 1H), 7.53–7.49 (m, 2H), 7.09–7.02 (m, 2H), 3.88 (s, 3H), 3.21 (q, *J* = 7.6 Hz, 2H), 2.79 (q, *J* = 7.6 Hz, 2H), 1.39 (t, *J* = 7.6

Hz, 3H), 1.06 (t,  $J = 7.6$  Hz, 3H).  $^{13}\text{C}$ -NMR (150 MHz,  $(\text{CD}_3)_2\text{CO}$ )  $\delta$  161.1, 160.8, 148.7, 147.1, 135.9, 133.6, 130.8, 120.2, 114.2, 108.9, 55.6, 22.9, 21.7, 15.8, 11.0. HRMS (ESI/[ $\text{M}+\text{H}$ ] $^+$ ): calcd for  $\text{C}_{17}\text{H}_{20}\text{N}_3\text{O}^+$ : 282.1601; Found 282.1602.

### 5,6-Diethyl-7-(4-(trifluoromethyl)phenyl)imidazo[1,2-*a*]pyrimidine (7c)

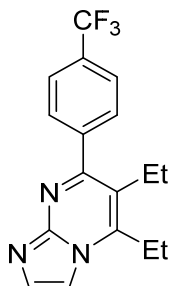

Synthesized according to General Procedure E: (*E*)-*N*-(1*H*-Imidazol-2-yl)-1-(4-(trifluoromethyl)phenyl)methanimine **1c** (72 mg, 0.30 mmol, 1.0 equiv), 3-hexyne **6a** (51  $\mu\text{L}$ , 0.45 mmol, 1.5 equiv),  $[\text{Cp}^*\text{Rh}(\text{MeCN})_3][\text{SbF}_6]_2$  (25 mg, 0.03 mmol, 0.10 equiv),  $\text{Cu}(\text{OAc})_2$  (120 mg, 0.66 mmol, 2.2 equiv), and trifluoroethanol (3 mL). The reaction mixture was stirred at 60  $^\circ\text{C}$  for 16 h. Purification by silica gel column chromatography (40%, then 50% acetone/hexanes) afforded **7c** (67 mg, 70%) as a white solid. FTIR (neat) 2938, 1495, 1323, 1120, 1106, 1068, 856  $\text{cm}^{-1}$ .  $^1\text{H}$ -NMR (600 MHz,  $(\text{CD}_3)_2\text{CO}$ )  $\delta$  7.94 (bs, 1H), 7.88 (d,  $J = 8.0$  Hz, 2H), 7.81 (bs, 1H), 7.80 (d,  $J = 8.0$  Hz, 2H), 3.26 (q,  $J = 7.6$  Hz, 2H), 2.76 (q,  $J = 7.6$  Hz, 2H), 1.41 (t,  $J = 7.6$  Hz, 3H), 1.06 (t,  $J = 7.6$  Hz, 3H).  $^{13}\text{C}$ -NMR (150 MHz,  $(\text{CD}_3)_2\text{CO}$ )  $\delta$  159.8, 147.8, 145.2, 136.4, 130.6 (q,  $J = 32.9$  Hz), 130.2, 125.9 (q,  $J = 3.6$  Hz), 125.3, (q,  $J = 271.3$  Hz), 119.9, 109.5, 23.0, 21.6, 15.7, 10.9.  $^{19}\text{F}$  NMR (376 MHz,  $(\text{CD}_3)_2\text{CO}$ ):  $\delta$  -63.0. HRMS (ESI/[ $\text{M}+\text{H}$ ] $^+$ ): calcd for  $\text{C}_{17}\text{H}_{17}\text{F}_3\text{N}_3^+$ : 320.1369; Found 320.1369.

### Methyl 4-(5,6-diethylimidazo[1,2-*a*]pyrimidin-7-yl)benzoate (7d)

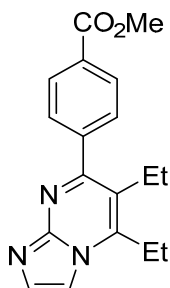

Synthesized according to General Procedure E: Methyl (*E*)-4-(((1*H*-Imidazol-2-yl)imino)methyl)benzoate **1d** (69 mg, 0.30 mmol, 1.0 equiv), 3-hexyne **6a** (51  $\mu\text{L}$ , 0.45 mmol, 1.5 equiv),  $[\text{Cp}^*\text{Rh}(\text{MeCN})_3][\text{SbF}_6]_2$  (25 mg, 0.03 mmol, 0.10 equiv),  $\text{Cu}(\text{OAc})_2$  (120 mg, 0.66 mmol, 2.2 equiv), and trifluoroethanol (3 mL). The reaction mixture was stirred at 60  $^\circ\text{C}$  for 16 h. Purification by silica gel column chromatography (40% acetone/hexanes) afforded **7d** (77 mg, 83%) as a white solid. FTIR (neat) 1722, 1279, 1103, 763  $\text{cm}^{-1}$ .  $^1\text{H}$ -NMR (600 MHz,  $\text{CDCl}_3$ )  $\delta$  8.13 (d,  $J = 8.0$  Hz, 2H), 7.86 (s, 1H), 7.59 (d,  $J = 7.8$  Hz, 2H), 7.53 (s, 1H), 3.95 (s, 3H), 3.09 (q,  $J = 7.6$  Hz, 2H), 2.68 (q,  $J = 7.6$  Hz, 2H), 1.41 (t,  $J = 7.6$  Hz, 3H), 1.03 (t,  $J = 7.6$  Hz, 3H).  $^{13}\text{C}$ -NMR (150 MHz,  $\text{CDCl}_3$ )  $\delta$  166.9, 160.0, 147.8, 146.2, 144.1, 136.2, 130.3, 129.6, 128.8, 119.6,

107.8, 52.4, 22.7, 21.2, 15.7, 10.7. HRMS (ESI/[M+H]<sup>+</sup>): calcd for C<sub>18</sub>H<sub>20</sub>N<sub>3</sub>O<sub>2</sub><sup>+</sup>: 310.1550; Found 310.15490.

### 7-(3-Bromophenyl)-5,6-diethylimidazo[1,2-*a*]pyrimidine (7e)

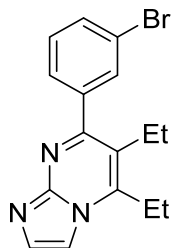

Synthesized according to General Procedure E: (*E*)-1-(3-Bromophenyl)-*N*-(1*H*-imidazol-2-yl)methanimine **1e** (75 mg, 0.30 mmol, 1.0 equiv), 3-hexyne **6a** (51  $\mu$ L, 0.45 mmol, 1.5 equiv), [Cp\*Rh(MeCN)<sub>3</sub>][SbF<sub>6</sub>]<sub>2</sub> (25 mg, 0.03 mmol, 0.10 equiv), Cu(OAc)<sub>2</sub> (120 mg, 0.66 mmol, 2.2 equiv), and trifluoroethanol (3 mL). The reaction mixture was stirred at 60 °C for 16 h. Purification by silica gel column chromatography (30%, then 50% acetone/hexanes) afforded **7e** (68 mg, 68%) as a white solid. FTIR (neat) 3123, 1596, 1499, 1283, 1252, 1145, 1053, 763 cm<sup>-1</sup>. <sup>1</sup>H-NMR (600 MHz, CDCl<sub>3</sub>)  $\delta$  7.86 (s, 1H), 7.68 (t, *J* = 2.0 Hz, 1H), 7.58 (ddd, *J* = 7.9; 2.0; 1.1 Hz, 1H), 7.52 (s, 1H), 7.45 (dt, *J* = 7.9; 1.1 Hz, 1H), 7.33 (t, *J* = 7.9 Hz, 1H), 3.09 (q, *J* = 7.6 Hz, 2H), 2.70 (q, *J* = 7.5 Hz, 2H), 1.41 (t, *J* = 7.6 Hz, 3H), 1.07 (t, *J* = 7.5 Hz, 3H). <sup>13</sup>C-NMR (150 MHz, CDCl<sub>3</sub>)  $\delta$  159.4, 147.8, 146.3, 141.7, 136.2, 131.8, 129.9, 127.3, 122.4, 119.6, 107.8, 22.7, 21.3, 15.8, 10.7. HRMS (ESI/[M+H]<sup>+</sup>): calcd for C<sub>16</sub>H<sub>17</sub>BrN<sub>3</sub><sup>+</sup>: 330.0600 and 332.0580; Found 330.0599 and 332.0581.

### 7-(2-Chlorophenyl)-5,6-diethylimidazo[1,2-*a*]pyrimidine (7f)

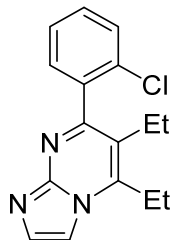

Synthesized according to General Procedure E: (*E*)-1-(2-Chlorophenyl)-*N*-(1*H*-imidazol-2-yl)methanimine **1f** (75 mg, 0.30 mmol, 1.0 equiv), 3-hexyne **6a** (51  $\mu$ L, 0.45 mmol, 1.5 equiv), [Cp\*Rh(MeCN)<sub>3</sub>][SbF<sub>6</sub>]<sub>2</sub> (25 mg, 0.03 mmol, 0.10 equiv), Cu(OAc)<sub>2</sub> (120 mg, 0.66 mmol, 2.2 equiv), and trifluoroethanol (3 mL). The reaction mixture was stirred at 60 °C for 16 h. Purification by silica gel column chromatography (25%, then 50% acetone/hexanes) afforded **7f** (41 mg, 47%) as a white solid. FTIR (neat) 2970, 2934, 1604, 1501, 1282, 1148, 727, 700 cm<sup>-1</sup>. <sup>1</sup>H-NMR (600 MHz, CDCl<sub>3</sub>)  $\delta$  7.88 (s, 1H), 7.55 (d, *J* = 1.4 Hz, 1H), 7.49–7.45 (m, 1H), 7.42–7.35 (m, 3H), 3.09 (q, *J* = 7.6 Hz, 2H), 2.64 (dq, *J* = 14.9; 7.6 Hz, 1H), 2.49 (dq, *J* = 14.9; 7.6 Hz, 1H), 1.43 (t, *J* = 7.6 Hz, 3H), 0.97 (t, *J* = 7.6 Hz, 3H). <sup>13</sup>C-NMR (150 MHz, CDCl<sub>3</sub>)  $\delta$  159.1, 147.9, 145.8, 138.4, 135.9, 132.6, 130.5, 130.0, 129.6, 126.9, 120.6, 107.9, 22.7, 21.3, 15.8, 10.7. HRMS (ESI/[M+H]<sup>+</sup>): calcd for C<sub>16</sub>H<sub>17</sub>ClN<sub>3</sub><sup>+</sup>: 286.1106; Found 286.1108.

### 3,4-Diethyl-2-phenylbenzo[4,5]imidazo[1,2-*a*]pyrimidine (**7g**)

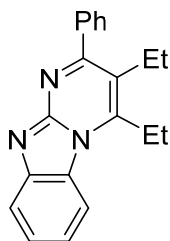

Synthesized according to General Procedure E: (*E*)-*N*-(1*H*-Benzo[*d*]imidazol-2-yl)-1-phenylmethanimine **1g** (66 mg, 0.30 mmol, 1.0 equiv), 3-hexyne **6a** (51  $\mu$ L, 0.45 mmol, 1.5 equiv), [Cp\**Rh*(MeCN)<sub>3</sub>][SbF<sub>6</sub>]<sub>2</sub> (25 mg, 0.03 mmol, 0.10 equiv), Cu(OAc)<sub>2</sub> (120 mg, 0.66 mmol, 2.2 equiv), and trifluoroethanol (3 mL). The reaction mixture was stirred at 60 °C for 16 h. Purification by silica gel column chromatography (10, then 20, then 30% Et<sub>2</sub>O/CH<sub>2</sub>Cl<sub>2</sub>) afforded **7g** (84 mg, 93%) as a yellow crystalline solid. FTIR (neat) 2964, 2932, 1590, 1490, 1307, 723, 702 cm<sup>-1</sup>. <sup>1</sup>H-NMR (600 MHz, CDCl<sub>3</sub>)  $\delta$  7.98 (d, *J* = 8.4 Hz, 1H), 7.94 (d, *J* = 8.4 Hz, 1H), 7.58–7.54 (m, 2H), 7.51 (ddd, *J* = 8.4; 7.1; 1.1 Hz, 1H), 7.48–7.39 (m, 3H), 7.32 (ddd, *J* = 8.4; 7.1; 1.1 Hz, 1H), 3.42 (q, *J* = 7.6 Hz, 2H), 2.76 (q, *J* = 7.6 Hz, 2H), 1.51 (t, *J* = 7.6 Hz, 3H), 1.07 (t, *J* = 7.5 Hz, 3H). <sup>13</sup>C-NMR (150 MHz, CDCl<sub>3</sub>)  $\delta$  166.2, 150.7, 150.6, 145.6, 139.6, 128.9, 128.4, 128.2, 127.1, 125.6, 121.4, 120.5, 118.6, 115.0, 22.5, 21.0, 15.8, 11.7. HRMS (ESI/[M+H]<sup>+</sup>): calcd for C<sub>20</sub>H<sub>20</sub>N<sub>3</sub><sup>+</sup>: 302.1652; Found 302.1653.

### 5,6-Diethyl-7-(furan-2-yl)imidazo[1,2-*a*]pyrimidine (**7h**)

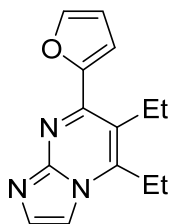

Synthesized according to General Procedure E: (*E*)-1-(Furan-2-yl)-*N*-(1*H*-imidazol-2-yl)methanimine **1h** (48 mg, 0.30 mmol, 1.0 equiv), 3-hexyne **6a** (51  $\mu$ L, 0.45 mmol, 1.5 equiv), [Cp\**Rh*(MeCN)<sub>3</sub>][SbF<sub>6</sub>]<sub>2</sub> (25 mg, 0.03 mmol, 0.10 equiv), Cu(OAc)<sub>2</sub> (120 mg, 0.66 mmol, 2.2 equiv), and trifluoroethanol (3 mL). The reaction mixture was stirred at 60 °C for 16 h. Purification by silica gel column chromatography (30%, then 50% acetone/hexanes) afforded **7h** (51 mg, 71%) as a yellow oil. FTIR (neat) 2975, 2931, 1599, 1512, 1454, 1153, 1011, 744 cm<sup>-1</sup>. <sup>1</sup>H-NMR (600 MHz, CDCl<sub>3</sub>)  $\delta$  7.82 (d, *J* = 1.4 Hz, 1H), 7.61 (dd, *J* = 1.8; 0.9 Hz, 1H), 7.47 (d, *J* = 1.4 Hz, 1H), 7.32 (dd, *J* = 3.5; 0.9 Hz, 1H), 6.58 (dd, *J* = 3.5; 1.8 Hz, 1H), 3.08 (q, *J* = 7.5 Hz, 2H), 3.04 (q, *J* = 7.5, 2H), 1.38 (t, *J* = 7.5 Hz, 3H), 1.28 (t, *J* = 7.5 Hz, 3H). <sup>13</sup>C-NMR (150 MHz, CDCl<sub>3</sub>)  $\delta$  153.6, 148.7, 148.3, 146.2, 144.1, 136.3, 118.7, 114.0, 112.2, 107.8, 22.4, 21.0, 15.8, 10.7. HRMS (ESI/[M+H]<sup>+</sup>): calcd for C<sub>14</sub>H<sub>16</sub>N<sub>3</sub>O<sup>+</sup>: 242.1288; Found 242.1290.

### (*E*)-5,6-Diethyl-7-styrylimidazo[1,2-*a*]pyrimidine (**7i**)

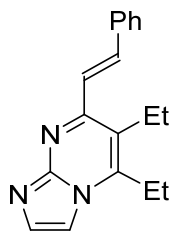

Synthesized according to General Procedure E: (*1E,2E*)-*N*-(1*H*-Imidazol-2-yl)-3-phenylprop-2-en-1-imine **1i** (59 mg, 0.30 mmol, 1.0 equiv), 3-hexyne **6a** (51  $\mu$ L, 0.45 mmol, 1.5 equiv), [Cp\**Rh*(MeCN)<sub>3</sub>][SbF<sub>6</sub>]<sub>2</sub> (25 mg, 0.03 mmol, 0.10 equiv), Cu(OAc)<sub>2</sub> (120 mg, 0.66 mmol, 2.2 equiv), and trifluoroethanol (3 mL). The reaction mixture was stirred at 60 °C for 16 h. Purification by silica gel column chromatography (25%, then 40% acetone/hexanes) afforded **7i** (62 mg, 75%) as a yellow oil. FTIR (neat) 2968, 1592, 1514, 1449, 718, 691 cm<sup>-1</sup>. <sup>1</sup>H-NMR (600 MHz, CDCl<sub>3</sub>)  $\delta$  8.17 (d, *J* = 15.4 Hz, 1H), 7.80 (s, 1H), 7.64–7.61 (m, 2H), 7.45 (s, 1H), 7.42–7.37 (m, 2H), 7.36–7.31 (m, 2H), 3.04 (q, *J* = 7.7 Hz, 2H), 2.86 (q, *J* = 7.6 Hz, 2H), 1.36 (t, *J* = 7.7 Hz, 3H), 1.29 (t, *J* = 7.6 Hz, 3H). <sup>13</sup>C-NMR (150 MHz, CDCl<sub>3</sub>)  $\delta$  154.6, 148.5, 144.9, 137.9, 136.7, 135.8, 129.0, 128.9, 127.8, 122.2, 119.4, 107.7, 22.5, 20.5, 15.7, 10.9. HRMS (ESI/[M+H]<sup>+</sup>): calcd for C<sub>18</sub>H<sub>20</sub>N<sub>3</sub><sup>+</sup>: 278.1652; Found 278.1652.

### 5,6,7-Triphenylimidazo[1,2-*a*]pyrimidine (**7j**)

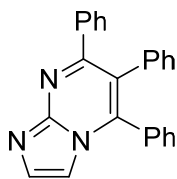

Synthesized according to General Procedure E: (*E*)-*N*-(1*H*-Imidazol-2-yl)-1-phenylmethanimine **1a** (51 mg, 0.30 mmol, 1.0 equiv), diphenylacetylene **6b** (80 mg, 0.45 mmol, 1.5 equiv), [Cp\**Rh*(MeCN)<sub>3</sub>][SbF<sub>6</sub>]<sub>2</sub> (25 mg, 0.03 mmol, 0.10 equiv), Cu(OAc)<sub>2</sub> (120 mg, 0.66 mmol, 2.2 equiv), and trifluoroethanol (3 mL). The reaction mixture was stirred at 60 °C for 16 h. Purification by silica gel column chromatography (40% acetone/hexanes) afforded **7j** (79 mg, 75%) as a white crystalline solid. FTIR (neat) 1476, 1262, 1145, 763, 694 cm<sup>-1</sup>. <sup>1</sup>H-NMR (600 MHz, CDCl<sub>3</sub>)  $\delta$  7.76 (bs, 1H), 7.41–7.31 (m, 5H), 7.27–7.19 (m, 4H), 7.18–7.14 (m, 2H), 7.09–7.01 (m, 3H), 6.91–6.87 (m, 2H). <sup>13</sup>C-NMR (150 MHz, CDCl<sub>3</sub>)  $\delta$  159.2, 148.6, 144.1, 138.9, 135.8, 135.3, 131.7, 131.6, 130.0, 129.9, 129.2, 129.0, 128.6, 128.0, 127.7, 127.3, 121.4, 109.7. HRMS (ESI/[M+H]<sup>+</sup>): calcd for C<sub>24</sub>H<sub>18</sub>N<sub>3</sub><sup>+</sup>: 348.1495; Found 348.1495.

### 6-Ethyl-5,7-diphenylimidazo[1,2-*a*]pyrimidine (**7k**)

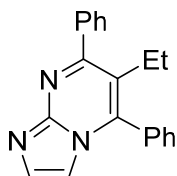

Synthesized according to General Procedure E: (*E*)-*N*-(1*H*-Imidazol-2-yl)-1-phenylmethanimine **1a** (51 mg, 0.30 mmol, 1.0 equiv), 1-phenyl-1-butyne **6c** (64  $\mu$ L, 0.45 mmol, 1.5 equiv),

[Cp\*Rh(MeCN)<sub>3</sub>][SbF<sub>6</sub>]<sub>2</sub> (25 mg, 0.03 mmol, 0.10 equiv), Cu(OAc)<sub>2</sub> (120 mg, 0.66 mmol, 2.2 equiv), and trifluoroethanol (3 mL). The reaction mixture was stirred at 60 °C for 16 h. Purification by silica gel column chromatography (25%, then 40% acetone/hexanes) afforded **7k** (70 mg, 78%) as mixture of regioisomers in a 2.8:1 ratio. The mixture appeared as a yellow oil. The two isomers would partially overlap; however, it was found that by preparative TLC (50% acetone/hexanes), it was possible to obtain each isomer for analysis. The structures were assigned by <sup>1</sup>H-NMR NOESY experiments.

### 6-Ethyl-5,7-diphenylimidazo[1,2-*a*]pyrimidine (**7ka**)

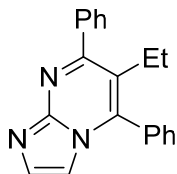

Major isomer, *R<sub>f</sub>* (50% acetone/hexanes) = 0.53. FTIR (neat) 2921, 1482, 1259, 696 cm<sup>-1</sup>. <sup>1</sup>H-NMR (600 MHz, CDCl<sub>3</sub>) δ 7.70 (s, 1H), 7.67–7.57 (m, 5H), 7.52–7.39 (m, 5H), 6.96 (s, 1H), 2.57 (q, *J* = 7.5 Hz, 2H), 0.76 (t, *J* = 7.4 Hz, 3H). <sup>13</sup>C-NMR (150 MHz, CDCl<sub>3</sub>) δ 161.5, 148.1, 143.7, 139.6, 135.3, 131.8, 130.4, 129.8, 128.8, 128.67, 128.65, 128.4, 121.1, 109.5, 21.8, 15.1. HRMS (ESI/[M+H]<sup>+</sup>): calcd for C<sub>20</sub>H<sub>18</sub>N<sub>3</sub><sup>+</sup>: 300.1495; Found 300.1495.

### 5-Ethyl-6,7-diphenylimidazo[1,2-*a*]pyrimidine (**7kb**)

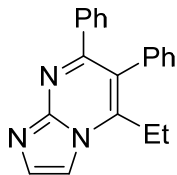

Minor isomer, *R<sub>f</sub>* (50% acetone/hexanes) = 0.40. FTIR (neat) 2919, 1486, 1267, 695 cm<sup>-1</sup>. <sup>1</sup>H-NMR (600 MHz, CDCl<sub>3</sub>) δ 7.92 (s, 1H), 7.56 (s, 1H), 7.39–7.30 (m, 5H), 7.24–7.09 (m, 5H), 2.88 (q, *J* = 7.6 Hz, 2H), 1.30 (t, *J* = 7.6 Hz, 3H). <sup>13</sup>C-NMR (150 MHz, CDCl<sub>3</sub>) δ 159.0, 148.6, 146.6, 139.0, 136.3, 135.9, 131.0, 130.0, 128.7, 128.5, 128.0, 127.7, 121.1, 108.1, 23.7, 10.8. HRMS (ESI/[M+H]<sup>+</sup>): calcd for C<sub>20</sub>H<sub>18</sub>N<sub>3</sub><sup>+</sup>: 300.1495; Found 300.1495.

### 2-(*tert*-Butyl)-6,7-diethyl-5-phenylpyrazolo[1,5-*a*]pyrimidine (**7l**)

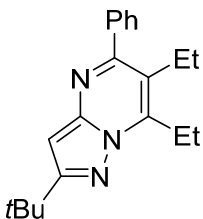

Synthesized according to General Procedure E: (*E*)-*N*-(3-(*tert*-Butyl)-1*H*-pyrazol-5-yl)-1-phenylmethanimine **1k** (73 mg, 94% purity by mass, 0.30 mmol, 1.0 equiv), 3-hexyne **6a** (51 μL, 0.45 mmol, 1.5 equiv), [Cp\*RhCl<sub>2</sub>]<sub>2</sub> (9 mg, 0.015 mmol, 0.05 equiv), AgOAc (110 mg, 0.66 mmol, 2.2 equiv), pivalic acid (123 mg, 1.20 mmol, 4.0 equiv), and tetrahydrofuran (3 mL). The reaction mixture was stirred at 100 °C for 16 h. Purification by silica gel column chromatography (2.5%,



then 5% ethyl acetate/hexanes) afforded **7l** (42 mg, 46%) as a yellow oil. FTIR (neat) 2960, 1602, 1501, 1358, 798, 701  $\text{cm}^{-1}$ .  $^1\text{H-NMR}$  (600 MHz,  $\text{CDCl}_3$ )  $\delta$  7.48–7.39 (m, 5H), 6.46 (s, 1H), 3.29 (q,  $J = 7.5$  Hz, 2H), 2.66 (q,  $J = 7.5$  Hz, 2H), 1.44 (t,  $J = 7.5$  Hz, 3H), 1.43 (s, 9H), 1.03 (t,  $J = 7.5$  Hz, 3H).  $^{13}\text{C-NMR}$  (150 MHz,  $\text{CDCl}_3$ )  $\delta$  167.2, 159.5, 148.4, 147.3, 140.4, 128.42, 128.39, 128.35, 118.2, 92.1, 33.0, 30.7, 21.3, 21.2, 15.9, 11.3. HRMS (ESI/[ $\text{M}+\text{H}$ ] $^+$ ): calcd for  $\text{C}_{20}\text{H}_{26}\text{N}_3^+$ : 308.2121; Found 308.2122.

### 6,7-Diethyl-3,5-diphenylpyrazolo[1,5-*a*]pyrimidine (**7m**)

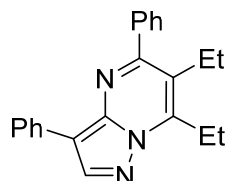

Synthesized according to General Procedure E: (*E*)-1-Phenyl-*N*-(4-phenyl-1*H*-pyrazol-5-yl)methanimine **1l** (74 mg, 0.30 mmol, 1.0 equiv), 3-hexyne **6a** (51  $\mu\text{L}$ , 0.45 mmol, 1.5 equiv),  $[\text{Cp}^*\text{RhCl}_2]_2$  (9 mg, 0.015 mmol, 0.05 equiv),  $\text{AgOAc}$  (110 mg, 0.66 mmol, 2.2 equiv), pivalic acid (123 mg, 1.20 mmol, 4.0 equiv), and tetrahydrofuran (3 mL). The reaction mixture was stirred at 100  $^\circ\text{C}$  for 16 h. Purification by silica gel column chromatography (5% ethyl acetate/hexanes) afforded **7m** (81 mg, 83%) as a yellow solid. FTIR (neat) 2978, 1602, 1496, 1300, 763, 693  $\text{cm}^{-1}$ .  $^1\text{H-NMR}$  (600 MHz,  $\text{CDCl}_3$ )  $\delta$  8.44 (s, 1H), 8.10 (dd,  $J = 8.2, 1.4$  Hz, 2H), 7.61–7.55 (m, 2H), 7.54–7.44 (m, 3H), 7.39 (t,  $J = 7.8$  Hz, 2H), 7.21 (tt,  $J = 7.3; 1.3$  Hz, 1H), 3.35 (q,  $J = 7.5$  Hz, 2H), 2.76 (q,  $J = 7.5$  Hz, 2H), 1.48 (t,  $J = 7.5$  Hz, 3H), 1.09 (t,  $J = 7.5$  Hz, 3H).  $^{13}\text{C-NMR}$  (150 MHz,  $\text{CDCl}_3$ )  $\delta$  160.2, 148.6, 143.4, 141.9, 140.3, 132.7, 128.8, 128.7, 128.3, 126.2, 125.9, 119.7, 110.2, 21.4, 21.3, 15.7, 11.6. HRMS (ESI/[ $\text{M}+\text{H}$ ] $^+$ ): calcd for  $\text{C}_{22}\text{H}_{22}\text{N}_3^+$ : 328.1808; Found 328.1807.

## 8. Experiments with Rhodacycle **8**

### Generation of Rh(III) imine complex

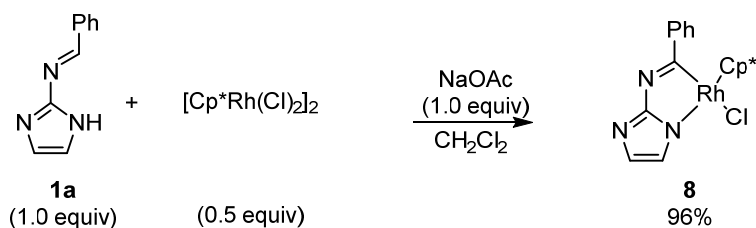

To a flame-dried microwave tube in a glove box was added (*E*)-*N*-(1*H*-imidazol-2-yl)-1-phenylmethanimine (34 mg, 0.20 mmol, 1.0 equiv),  $[\text{Cp}^*\text{RhCl}_2]_2$  (62 mg, 0.10 mmol, 0.5 equiv), NaOAc (16 mg, 0.20 mmol, 1.0 equiv) and dichloromethane (5 mL). The tube was capped, and the reaction mixture was stirred at 40 °C for 18 h. The reaction mixture was cooled to ambient temperature, and the mixture was filtered through a pad of dry celite into a 20 mL vial inside the glovebox. The solvent was slowly removed to yield the desired complex (85 mg, 96%) as a brown solid. FTIR (neat) 1707, 1563, 1450, 1022, 699  $\text{cm}^{-1}$ .  $^1\text{H-NMR}$  (500 MHz,  $\text{CDCl}_3$ )  $\delta$  7.81–7.78 (m, 2H), 7.46–7.39 (m, 3H), 6.93 (d,  $J = 1.7$  Hz, 1H), 6.63 (d,  $J = 1.7$  Hz, 1H), 1.47 (s, 15H).  $^{13}\text{C-NMR}$  (150 MHz,  $\text{CDCl}_3$ )  $\delta$  159.1 (d,  $J = 1.9$  Hz), 146.6, 129.53, 129.52 (d,  $J = 113.3$  Hz) 127.8, 127.2, 123.3, 115.5, 97.1 (d,  $J = 6.2$  Hz), 9.1. HRMS (ESI/[ $\text{M}+\text{H}$ ] $^+$ ): calcd for  $\text{C}_{20}\text{H}_{24}\text{ClN}_3\text{Rh}^+$ : 444.0708; Found 444.0707.

### Reaction of imine **1a** and sulfoxonium ylide **2a**

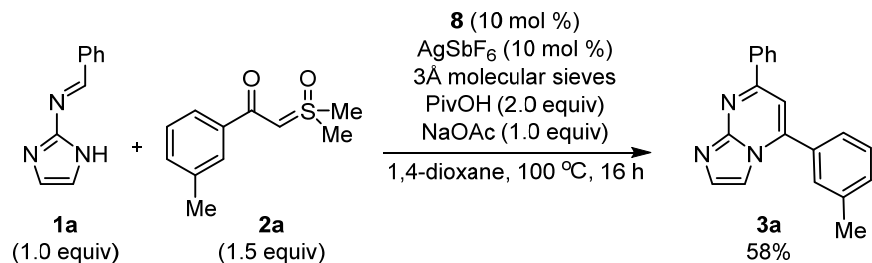

To a flame-dried microwave tube in a glove box was added (*E*)-*N*-(1*H*-imidazol-2-yl)-1-phenylmethanimine **1a** (51 mg, 0.30 mmol, 1.0 equiv), 2-(dimethyl(oxo)- $\lambda^6$ -sulfanylidene)-1-(*m*-tolyl)ethan-1-one **2a** (95 mg, 0.45 mmol, 1.5 equiv), rhodacycle **8a** (13 mg, 0.03 mmol, 0.1 equiv),  $\text{AgSbF}_6$  (10 mg, 0.03 mmol, 0.1 equiv), pivalic acid (61 mg, 0.60 mmol, 2.0 equiv), sodium acetate (25 mg, 0.30 mmol, 1.0 equiv), 3Å molecular sieves (approximately 70 mg), and 1,4-dioxane (3 mL). The tube was capped, and the reaction mixture was stirred at 100 °C for 16 h. The reaction mixture was cooled to ambient temperature and filtered through a plug of Celite with dichloromethane. The solvent was removed *in vacuo* and the crude reaction mixture was subjected to silica gel column chromatography (40% acetone/hexanes) to afford **3a** (50 mg, 58%) as a yellow foam. Spectroscopic data agreed with that reported above.

## Reaction of imine **1a** and alkyne **6a**

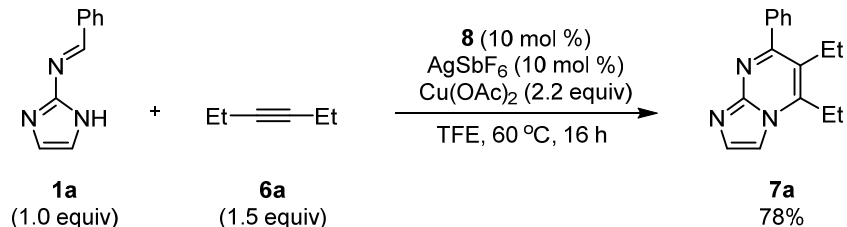

To a flame-dried microwave tube in a glove box was added (*E*)-*N*-(1*H*-imidazol-2-yl)-1-phenylmethanimine **1a** (51 mg, 0.30 mmol, 1.0 equiv), 3-hexyne **6a** (51  $\mu$ L, 0.45 mmol, 1.5 equiv), rhodacycle **8a** (13 mg, 0.03 mmol, 0.1 equiv), AgSbF<sub>6</sub> (10 mg, 0.03 mmol, 0.1 equiv), Cu(OAc)<sub>2</sub> (120 mg, 0.66 mmol, 2.2 equiv), and trifluoroethanol (3 mL). The tube was capped and the reaction mixture was stirred at 60 °C for 16 h. The reaction mixture was cooled to room temperature and concentrated *in vacuo*. The crude residue was diluted with 28% aq. NH<sub>3</sub> (10 mL) and brine (10 mL) and extracted with CH<sub>2</sub>Cl<sub>2</sub> (4 x 10 mL). The combined organic layers were dried over Na<sub>2</sub>SO<sub>4</sub>, filtered, and concentrated. The product was purified by silica gel column chromatography (50% acetone/hexanes) to afford **7a** (59 mg, 78%) as a white crystalline solid. Spectroscopic data agreed with that reported above.

## 9. Studies with Deuterated 1a-D

### Synthesis of Azolo imine 1a-D

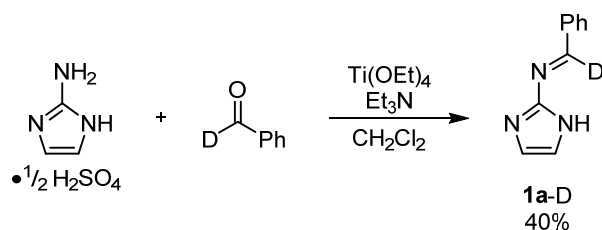

To a solution of deuterobenzaldehyde (278 mg, 2.60 mmol, 1.0 equiv) in dichloromethane (8 mL) were added sequentially 2-aminoimidazole sulfate (344 mg, 2.60 mmol, 1.0 equiv), titanium(IV) ethoxide (0.87 mL, 4.2 mmol, 1.6 equiv), and triethylamine (0.73 mL, 5.2 mmol, 2 equiv). The reaction mixture was stirred at ambient temperature for 18 h. The reaction was quenched with  $\text{H}_2\text{O}$  (2 x volume of dichloromethane). The resulting solid was filtered and washed with dichloromethane. The filtrate was transferred to a separatory funnel, and the layers were separated. The organic layer was dried over  $\text{MgSO}_4$ , filtered, and concentrated *in vacuo*. Then the crude material was filtered through a plug of silica with 50% EtOAc/hexanes. Subsequently, the imine was recrystallized in EtOAc/hexanes to afford (*E*)-*N*-(1*H*-imidazol-2-yl)-1-phenylmethanimine-d **1a-D** (179 mg, 40%) as an off-white solid. FTIR (neat) 1593, 1575, 1542, 1450, 1231, 1107, 995, 738, 688, 581  $\text{cm}^{-1}$ .  $^1\text{H-NMR}$  (600 MHz,  $(\text{CD}_3)_2\text{SO}$ )  $\delta$  12.31 (br s, 1H), 7.95 (d,  $J = 7.3$  Hz, 2H), 7.57–7.50 (m, 3H), 7.15 (s, 1H), 6.91 (s, 1H).  $^{13}\text{C-NMR}$  (150 MHz,  $(\text{CD}_3)_2\text{SO}$ )  $\delta$  158.9 (t,  $J = 25.0$  Hz), 150.6, 135.6, 131.7, 129.0, 128.6, 127.6, 116.9. HRMS (ESI/[ $\text{M}+\text{H}$ ] $^+$ ): calcd for  $\text{C}_{10}\text{H}_9\text{DN}_3^+$ : 173.0932; Found 173.0927.

### Determination of Deuterium/Protium Exchange

Exchange experiments were performed using an indirect mass spectrometric assay. Reactions were run to partial conversion, then treated with (2,4-dinitrophenyl)hydrazine until all remaining imine **1a/1a-D** had converted to protio- or deuterio-(*Z*)-1-benzylidene-2-(2,4-dinitrophenyl)hydrazine **S1a/S1a-D** (Scheme S1). The ratio of isomers **S1a/S1a-D** was determined on the crude reaction mixture by LC/MS.

### Scheme S1. Experimental Design for Exchange Studies

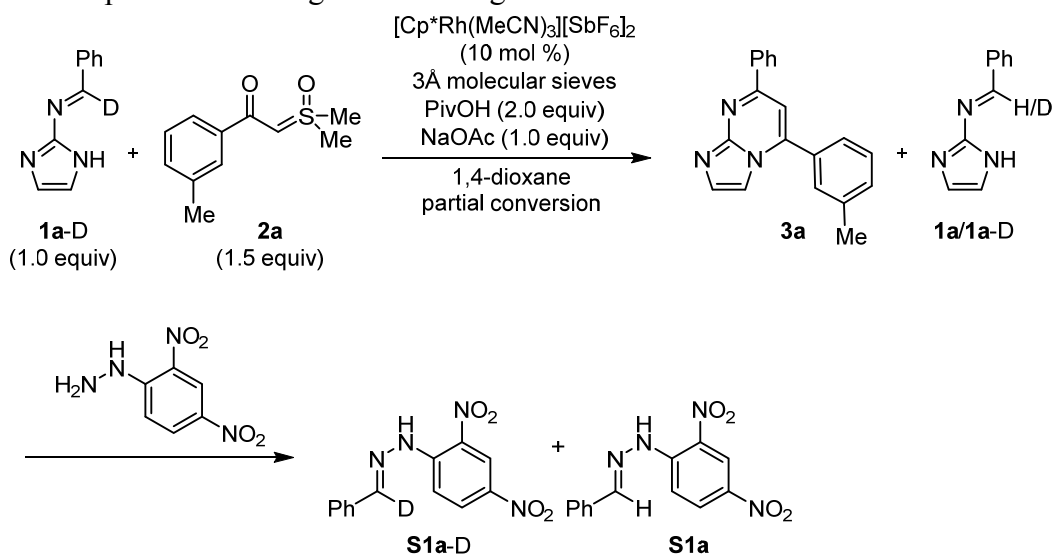

### Reaction Procedure

To a flame-dried microwave tube in a glove box was added (*E*)-1-deutero-*N*-(1*H*-imidazol-2-yl)-1-phenylmethanimine **1a-D** (34 mg, 0.20 mmol, 1.0 equiv), 2-(dimethyl(oxo)- $\lambda^6$ -sulfanylidene)-1-(*m*-tolyl)ethan-1-one **2a** (63 mg, 0.30 mmol, 1.5 equiv), [Cp\**Rh*(MeCN)<sub>3</sub>][SbF<sub>6</sub>]<sub>2</sub> (17 mg, 0.02 mmol, 0.10 equiv), pivalic acid (41 mg, 0.40 mmol, 2.0 equiv), sodium acetate (16 mg, 0.20 mmol, 1.0 equiv), 3Å molecular sieves (approximately 70 mg), and 1,4-dioxane (2 mL). The tube was capped, and the reaction mixture was stirred at 100 °C for 30 min (Figure S1) or 60 min (Figure S2). The reaction mixture was cooled to ambient temperature and filtered through a plug of Celite with exactly 2 mL 1,4-dioxane. The resultant solution was split in half. From the first half, the solvent was removed *in vacuo* and the crude reaction mixture was subjected to <sup>1</sup>H NMR analysis (with 1,3,5-trimethoxybenzene as an external standard) to determine conversion. The second half of the solution was treated with (2,4-dinitrophenyl)hydrazine (30% H<sub>2</sub>O, 71 mg, 0.25 mmol, 2.5 equiv relative to starting imine), and stirred at reflux (80 °C) until TLC indicated consumption of all **1a-D** (150 minutes). The crude material was then loaded onto LC/MS and assessed for protium/deuterium exchange.

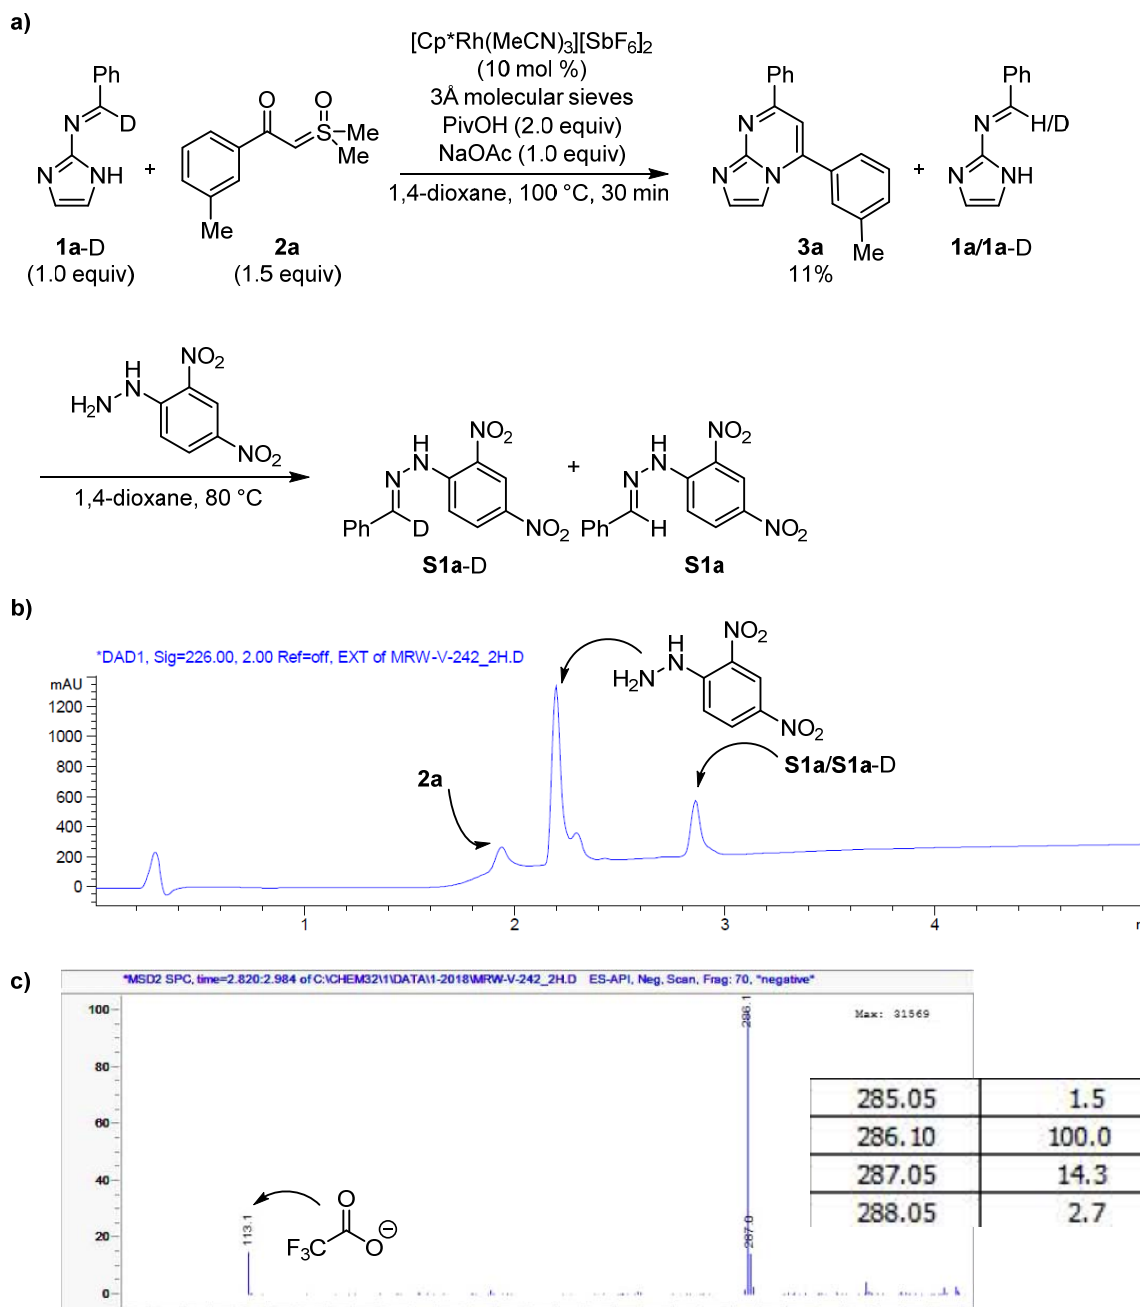

**Figure S1.** Reaction at 11% conversion. (a) Reaction set-up. (b) LC trace of crude reaction material at 226 nm. (c) Negative channel mass spectrum of **S1a/S1a-D** peak at 2.90 min with ion intensities.

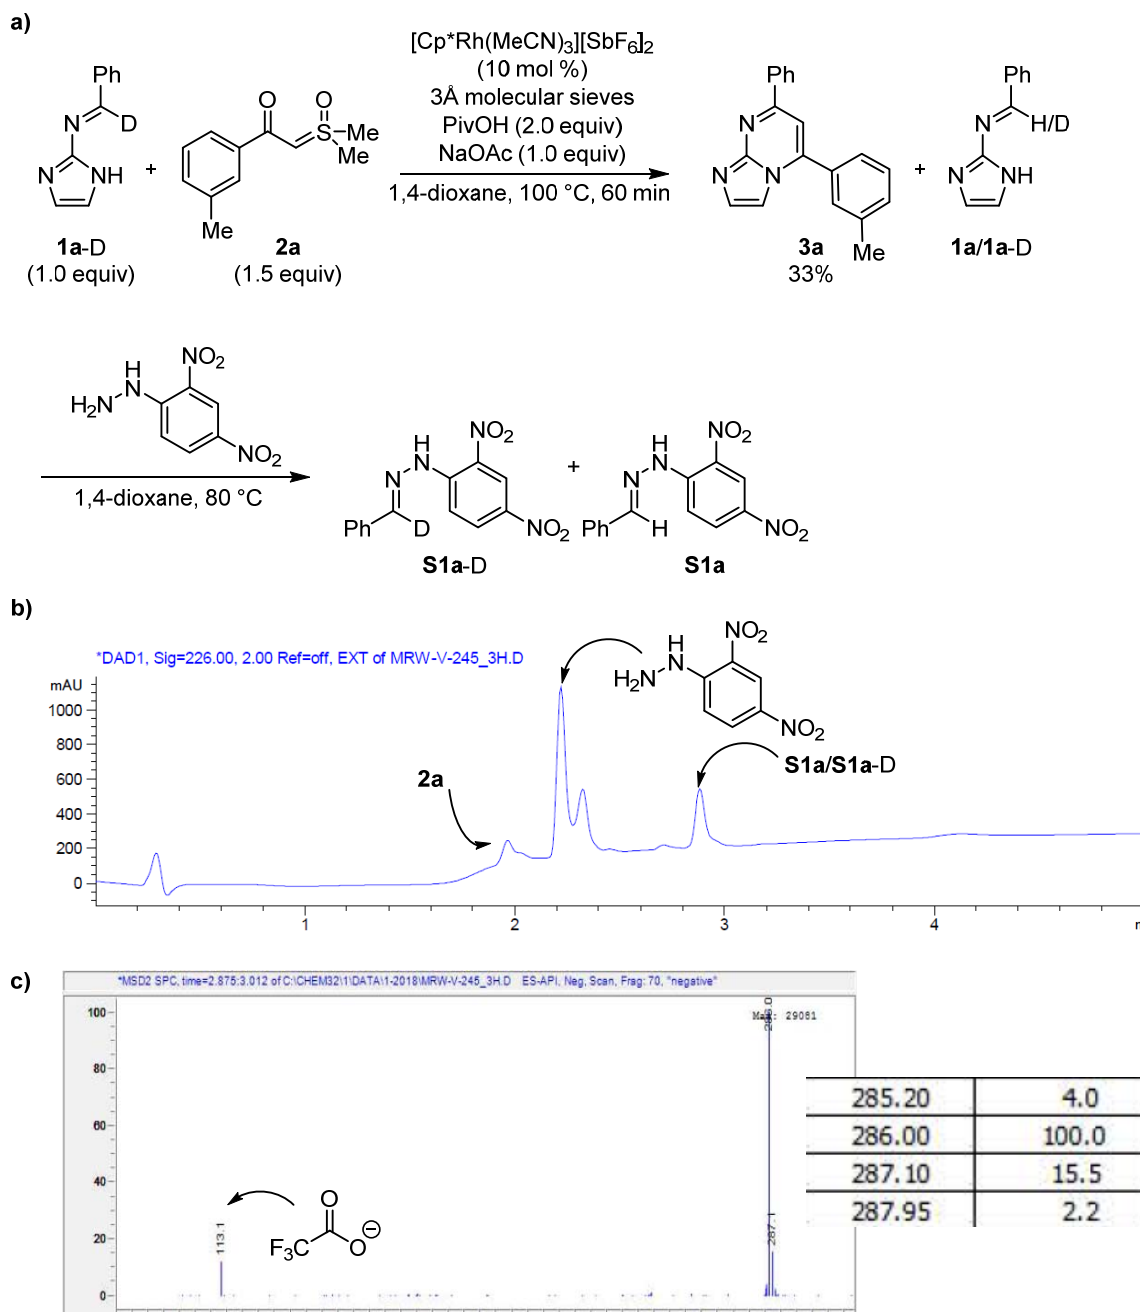

**Figure S2.** Reaction at 33% conversion. (a) Reaction set-up. (b) LC trace of crude reaction material at 226 nm. (c) Negative channel mass spectrum of **S1a/S1a-D** peak at 2.90 min with ion intensities.

## Control Experiment

As a control, deuterioimine **1a-D** (17 mg, 0.10 mmol, 1.0 equiv), (2,4-dinitrophenyl)hydrazine (30% H<sub>2</sub>O, 70 mg, 0.25 mmol, 2.5 equiv), PivOH (20 mg, 0.20 mmol, 2.0 equiv), and NaOAc (8.0 mg, 0.10 mmol, 1.0 equiv) were dissolved in 1,4-dioxane (2.0 mL) and the reaction was stirred at reflux (80 °C) until TLC indicated consumption of all **1a-D** (150 minutes). The crude material was then loaded onto LC/MS and assessed for the presence of trace protoimine **1a** (Figure S3). This revealed less than 0.3% protoimine **1a** in the deuterated sample.

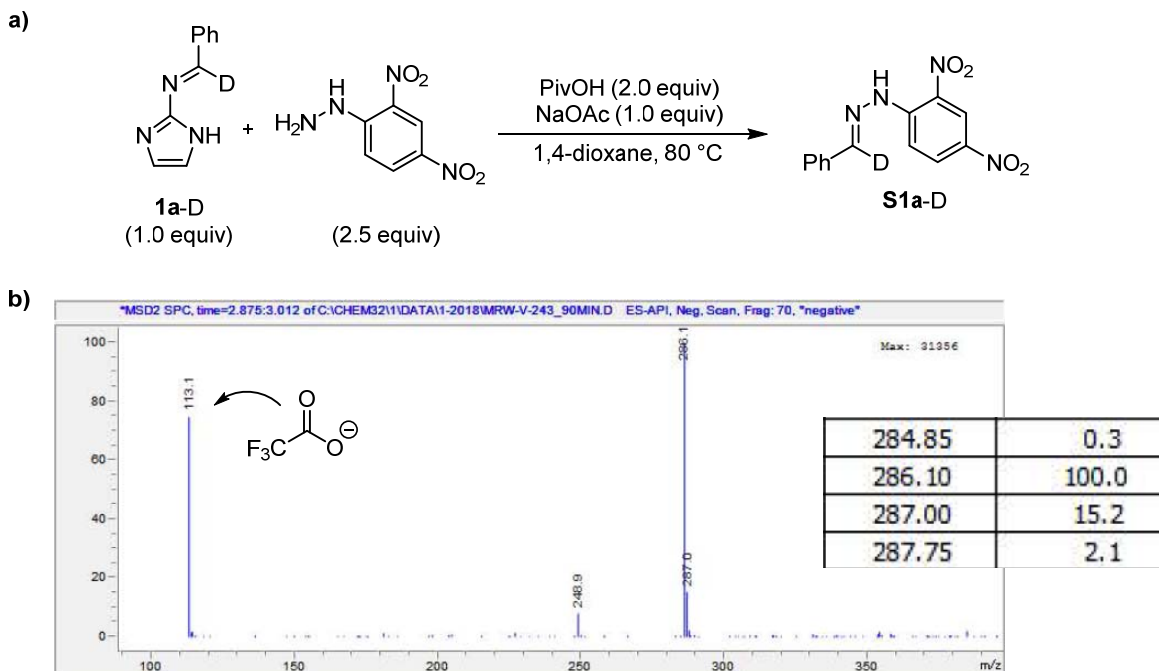

**Figure S3.** Reaction of **1a-D** with (2,4-dinitrophenyl)hydrazine. (a) Reaction scheme. (b) Negative channel mass spectrum of **S1a-D** peak at 2.90 min with ion intensities.



## Initial Rate Measurements for Kinetic Isotope Effect Studies

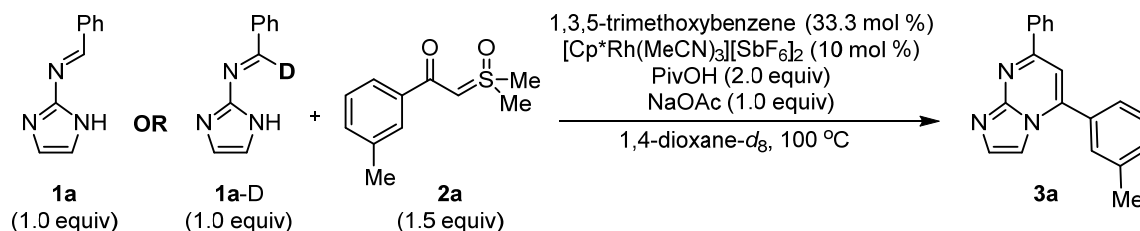

To an oven-dried J. Young NMR tube in a glove box was added imine (**1a**: 17.1 mg, 0.100 mmol, 1.0 equiv; or **1a-D**: 17.2 mg, 0.100 mmol, 1.0 equiv), 2-(dimethyl(oxo)- $\lambda^6$ -sulfanylidene)-1-(*m*-tolyl)ethan-1-one **2a** (31.5 mg, 0.150 mmol, 1.5 equiv), [Cp\*Rh(MeCN)<sub>3</sub>][SbF<sub>6</sub>]<sub>2</sub> (8.3 mg, 0.010 mmol, 0.10 equiv), pivalic acid (20.4 mg, 0.200 mmol, 2.0 equiv), sodium acetate (8.2 mg, 0.100 mmol, 1.0 equiv), 1,3,5-trimethoxybenzene (5.6 mg, 0.033 mmol, 0.33 equiv), and 1,4-dioxane-*d*<sub>8</sub> (1 mL). The tube was sealed, removed from the glove box, and inserted into a 500 MHz NMR instrument that had been previously equilibrated to 100 °C. Once the magnet had been shimmed, measurements for imine disappearance, ylide disappearance, and product formation were recorded every 5 min, based on internal standard 1,3,5-trimethoxybenzene (Table S4). Each experiment was run twice. Measurements for imine consumption were not possible for **1a-D** as the diagnostic <sup>1</sup>H NMR signal for **1a** had been deuterated.

**Table S4.** Kinetics for Reactions of Imines **1a** and **1a-D**.

| <b>1a</b> - Run 1   |           |                 |               | <b>1a</b> - Run 2   |           |                 |               |
|---------------------|-----------|-----------------|---------------|---------------------|-----------|-----------------|---------------|
| Time (min)          | yield (%) | <b>1a</b> (%)   | <b>2a</b> (%) | Time (min)          | yield (%) | <b>1a</b> (%)   | <b>2a</b> (%) |
| 0                   | 1         | 82              | 93            | 0                   | 5         | 95              | 80            |
| 5                   | 3         | 83              | 86            | 5                   | 8         | 92              | 76            |
| 10                  | 7         | 78              | 82            | 10                  | 12        | 87              | 73            |
| 15                  | 10        | 76              | 78            | 15                  | 15        | 79              | 70            |
| 20                  | 12        | 74              | 75            | 20                  | 18        | 80              | 72            |
| <b>1a-D</b> - Run 1 |           |                 |               | <b>1a-D</b> - Run 2 |           |                 |               |
| Time (min)          | yield (%) | <b>1a-D</b> (%) | <b>2a</b> (%) | Time (min)          | yield (%) | <b>1a-D</b> (%) | <b>2a</b> (%) |
| 0                   | 2         | ND              | 95            | 0                   | 1         | ND              | 88            |
| 5                   | 5         | ND              | 91            | 5                   | 3         | ND              | 82            |
| 10                  | 7         | ND              | 89            | 10                  | 5         | ND              | 79            |
| 15                  | 9         | ND              | 86            | 15                  | 7         | ND              | 80            |
| 20                  | 11        | ND              | 84            | 20                  | 8         | ND              | 77            |

Initial rate data for each experiment was graphed and the averaged slopes of the linear fits were used to calculate a kinetic isotope effect of  $k_H/k_D = 1.5 \pm 0.09$  (Figure S4).

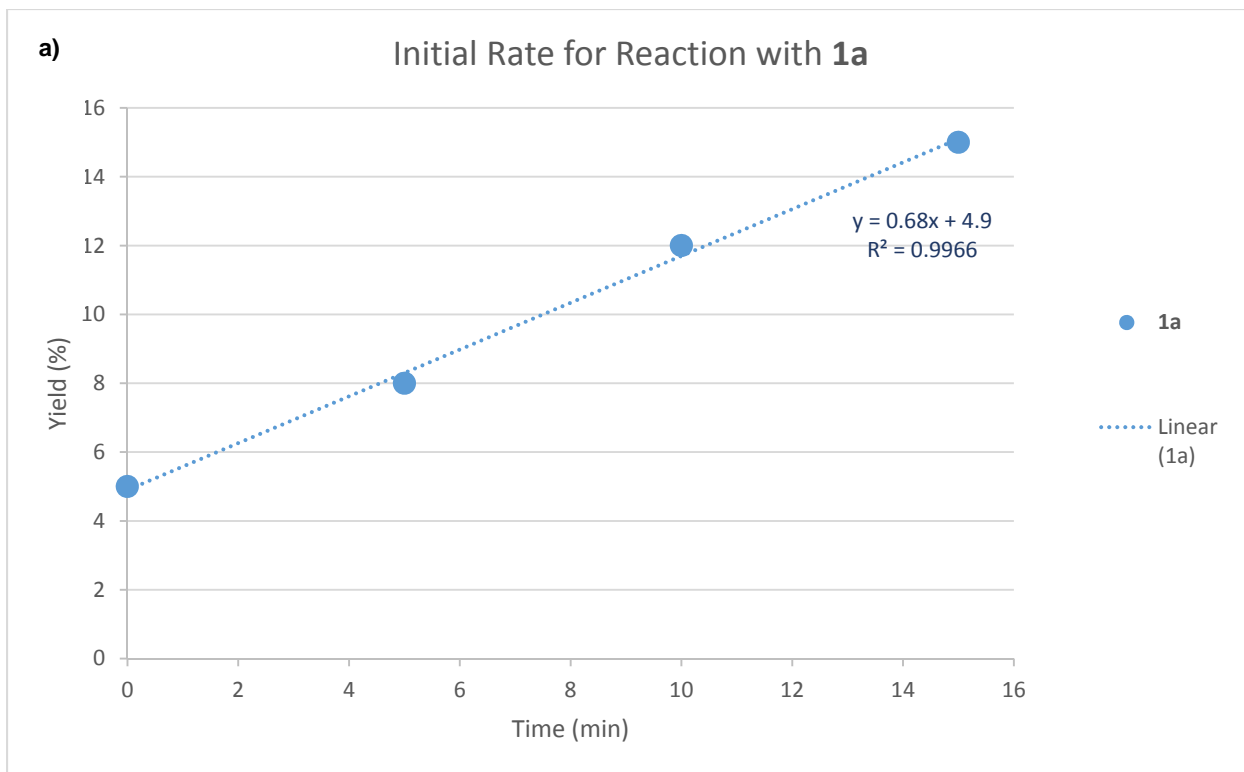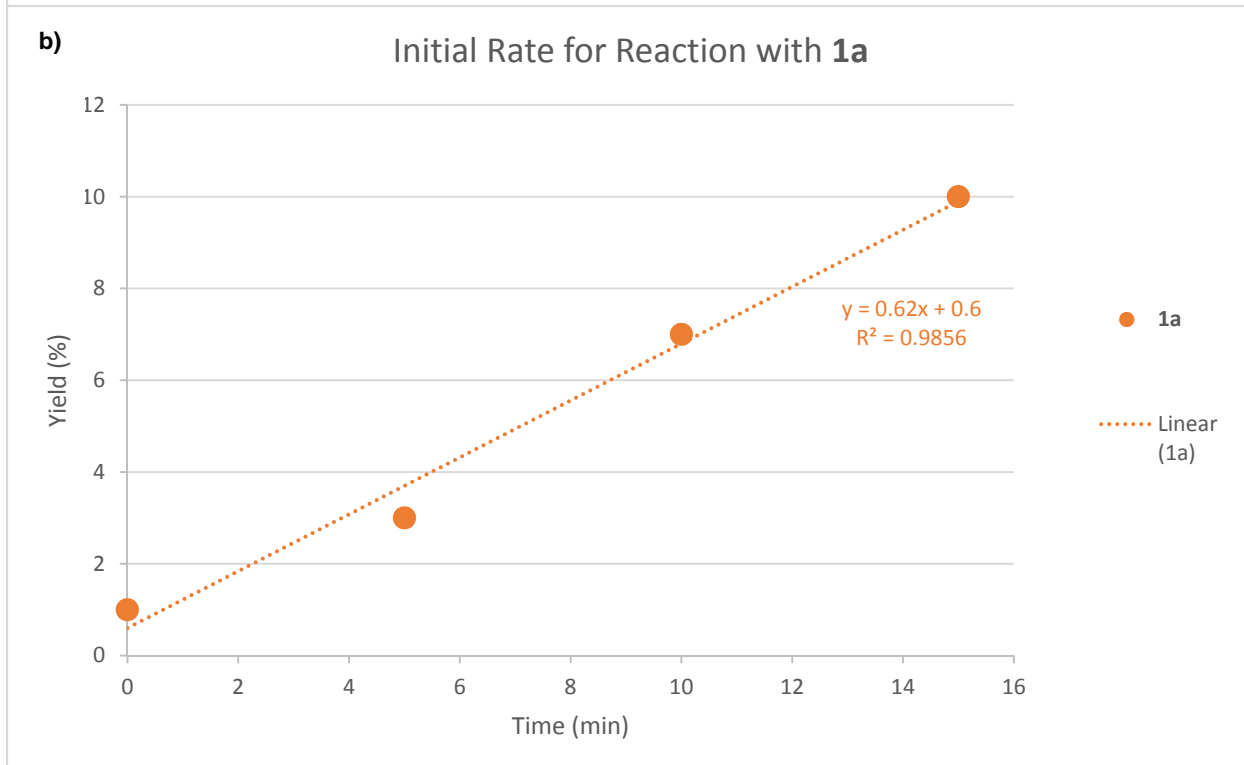

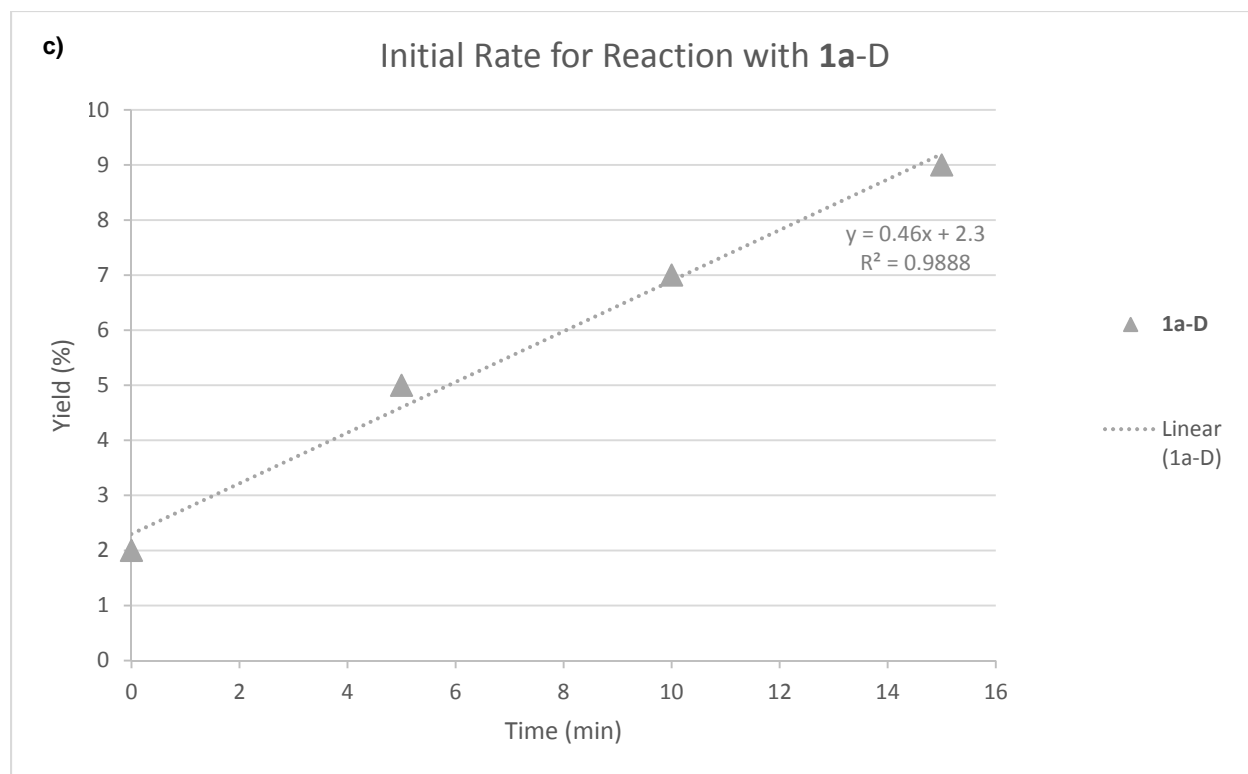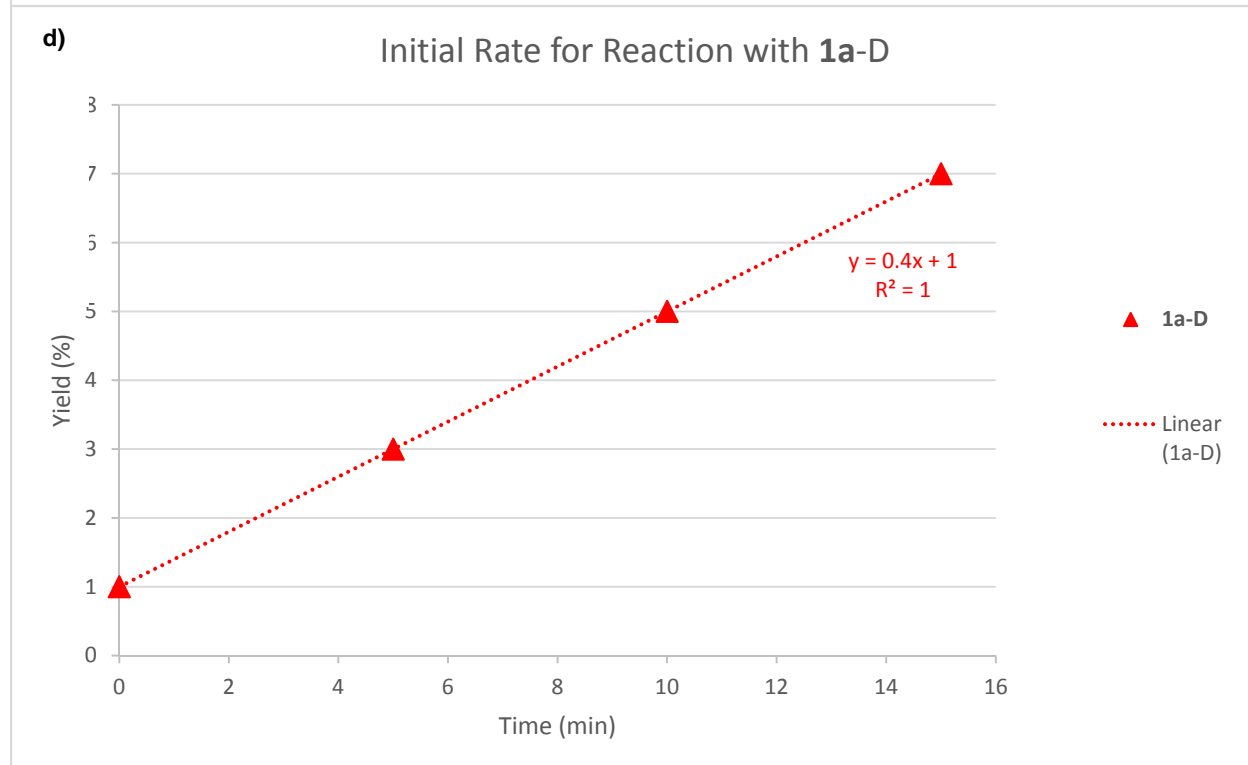

e)

$$\frac{k_H}{k_D} = \frac{0.65 \pm 0.021}{0.43 \pm 0.021} = 1.5 \pm 0.09$$

f) S4. Initial Rates for Reaction of a) and b) **1a** and c) and d) **1a-D**. e) Calculation of KIE.

## 10. Catalytic Cycles

**Scheme S2.** Proposed Mechanism of Rhodium(III)-Catalyzed C–H Functionalizations of Iminyl Azoles with Diazoketone **4**

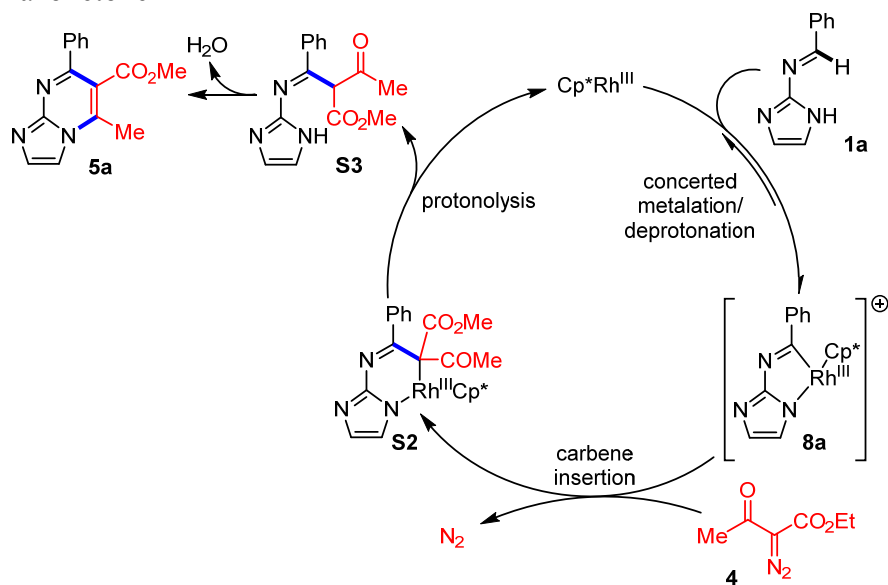

**Scheme S3.** Proposed Mechanism of Rhodium(III)-Catalyzed C–H Functionalizations of Iminyl Azoles with Alkynes **6**

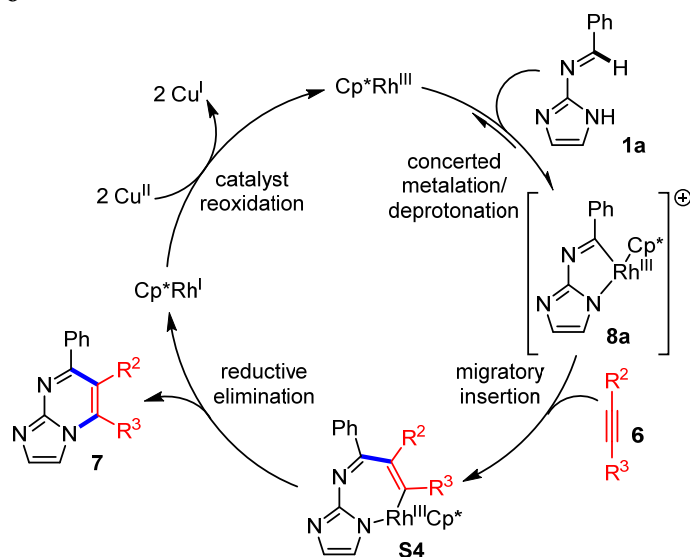

# 11. <sup>1</sup>H and <sup>13</sup>C NMR Spectra of New Imines, Ylides, Heterocycles, and Rhodacycle 8

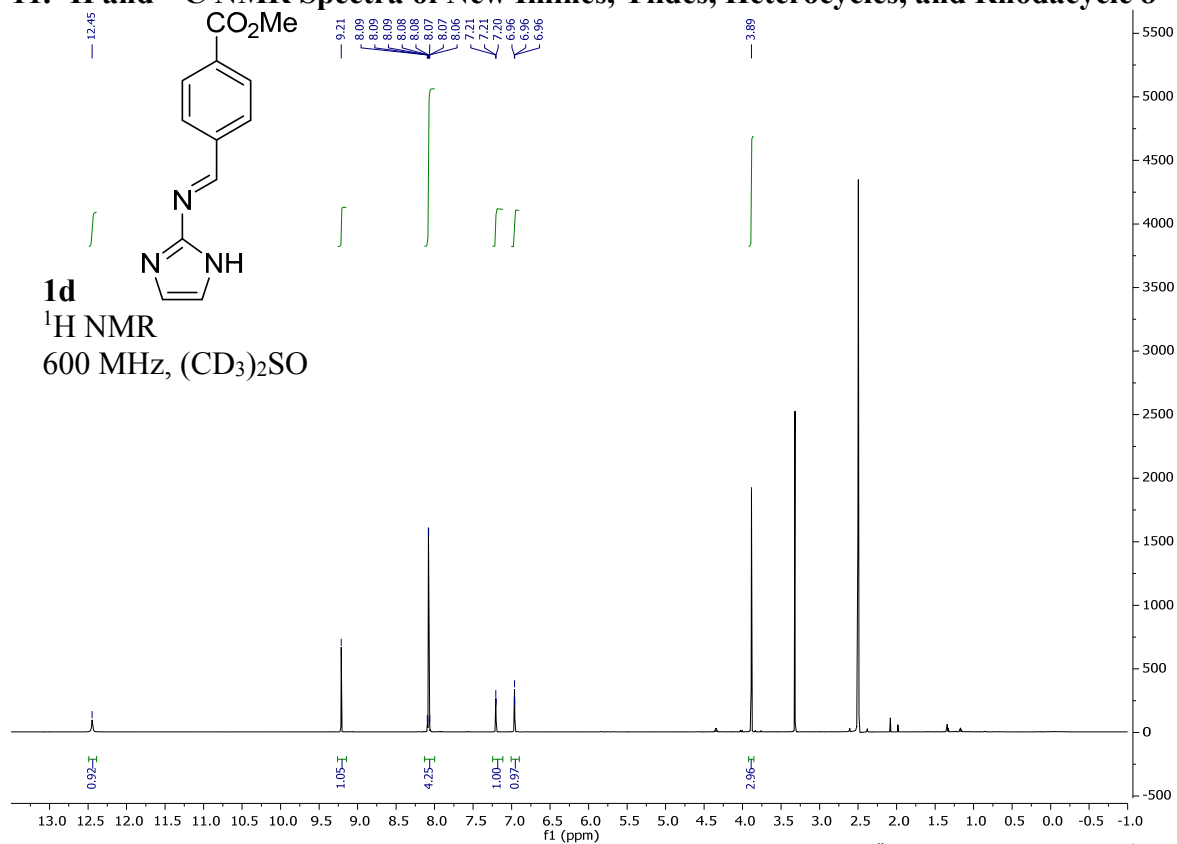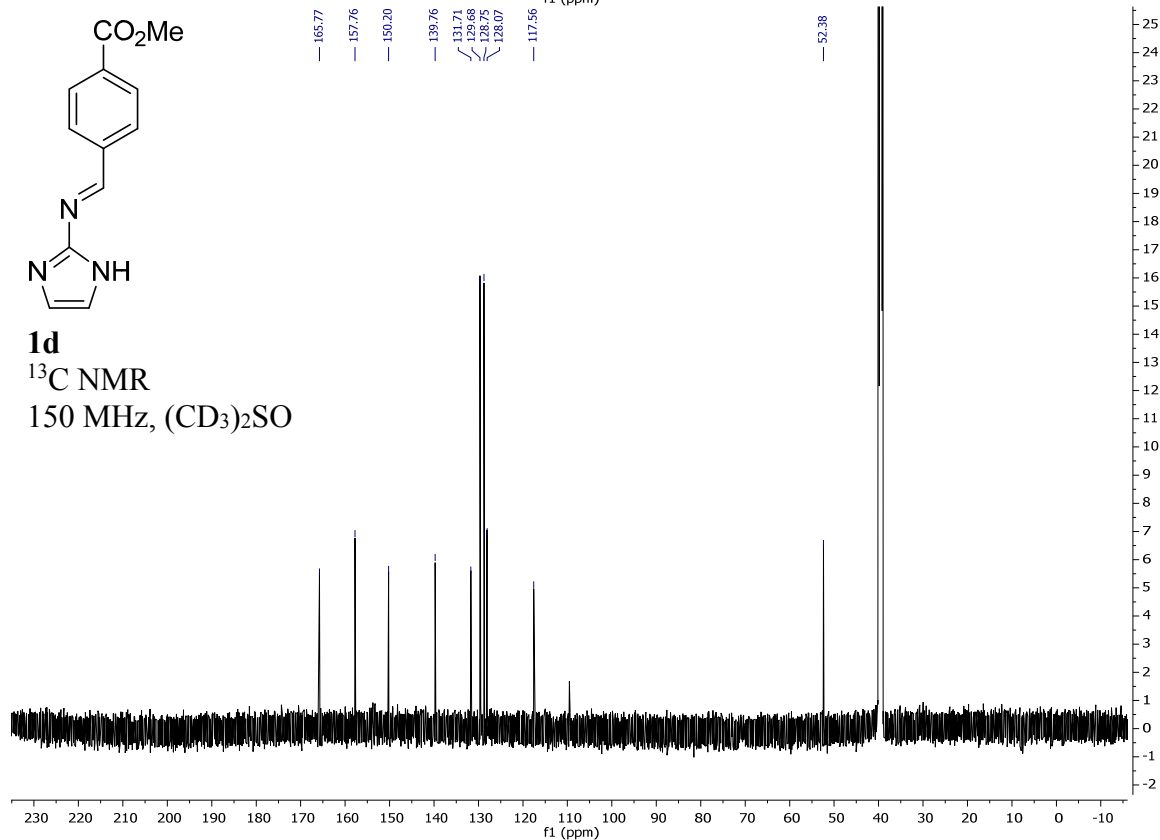

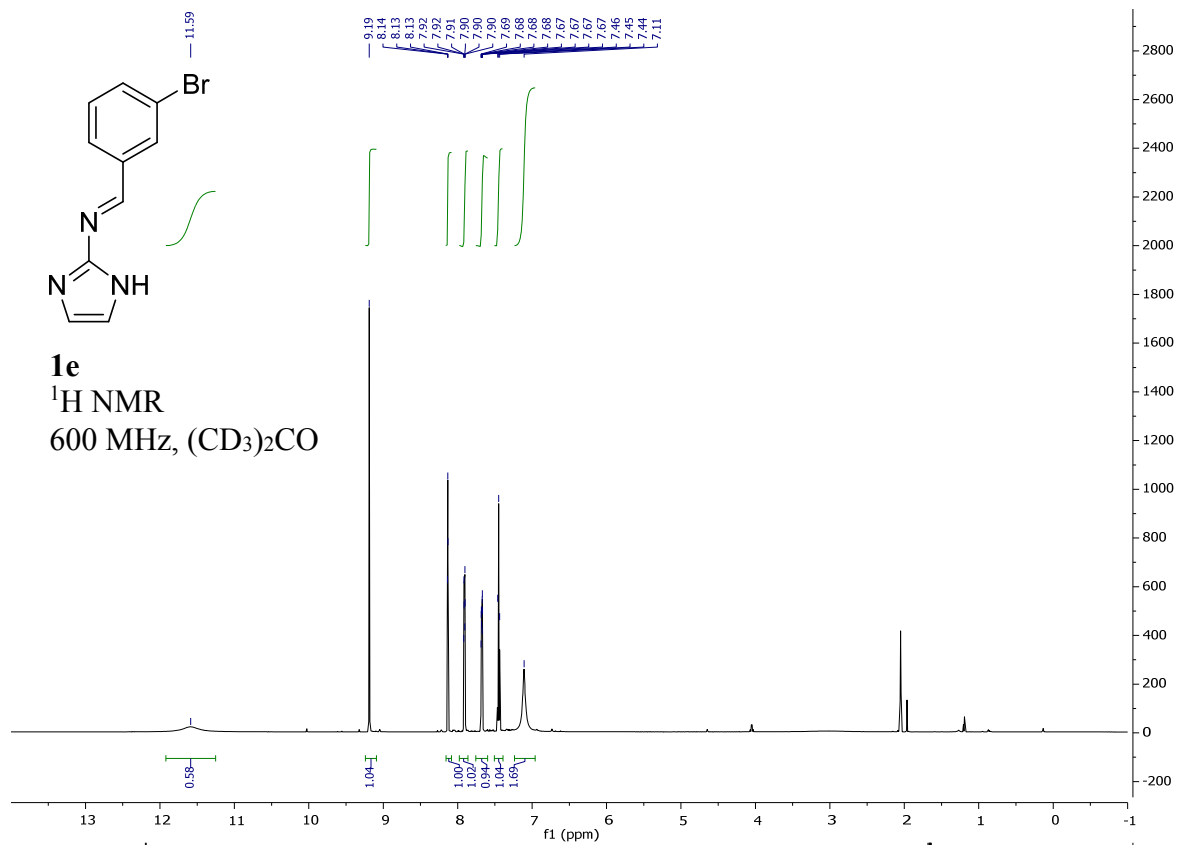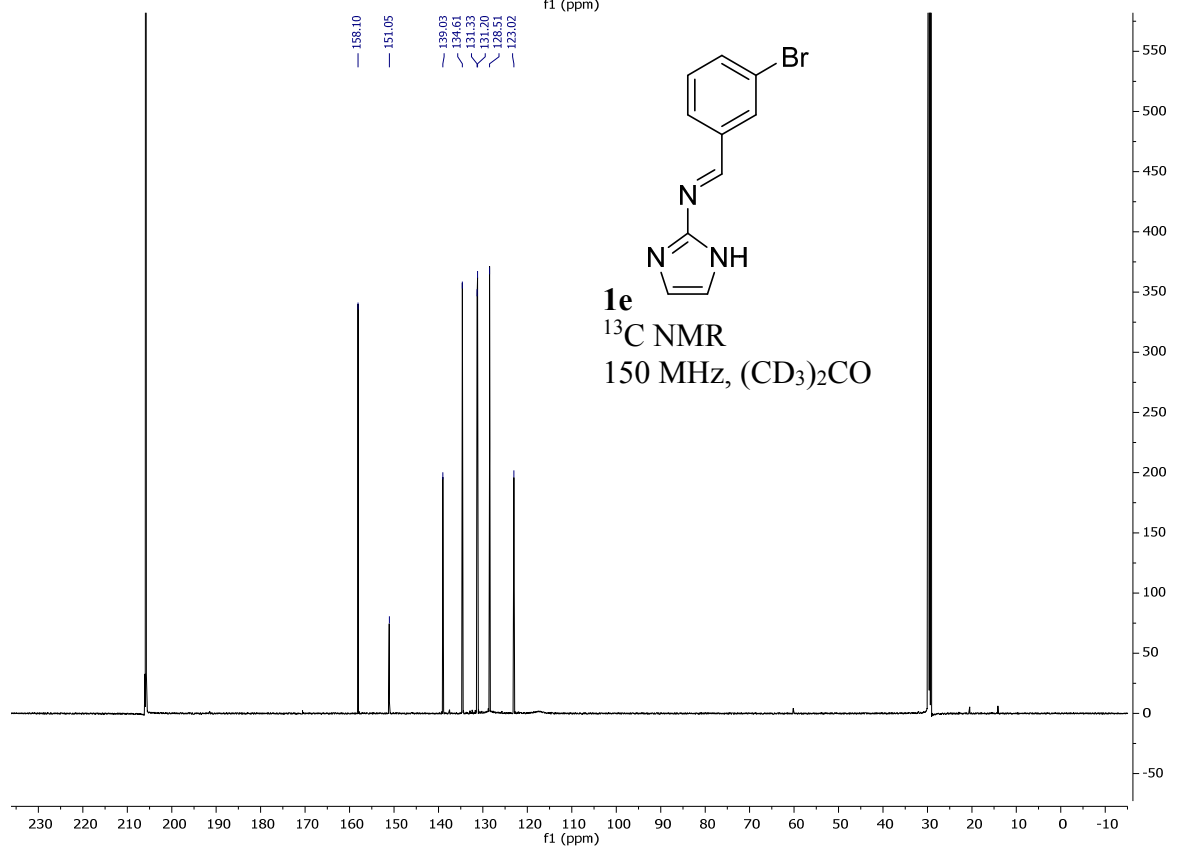

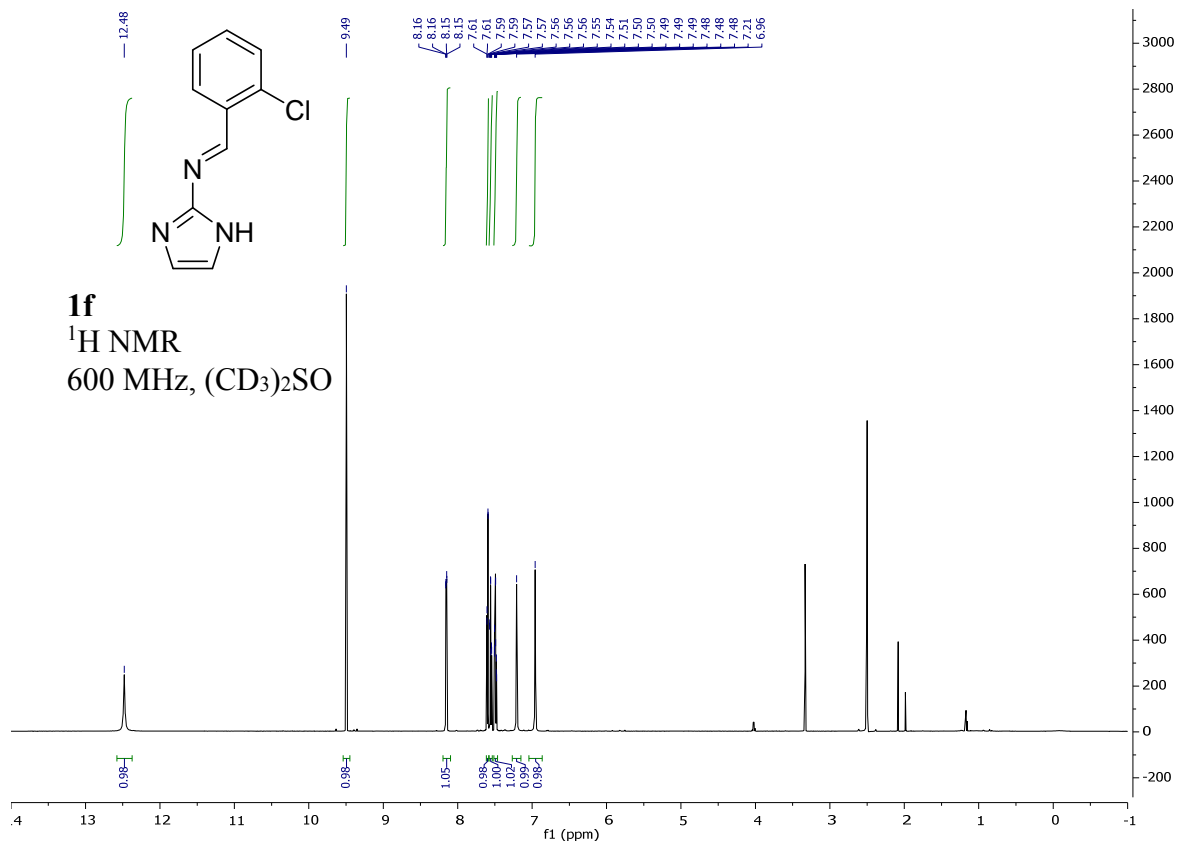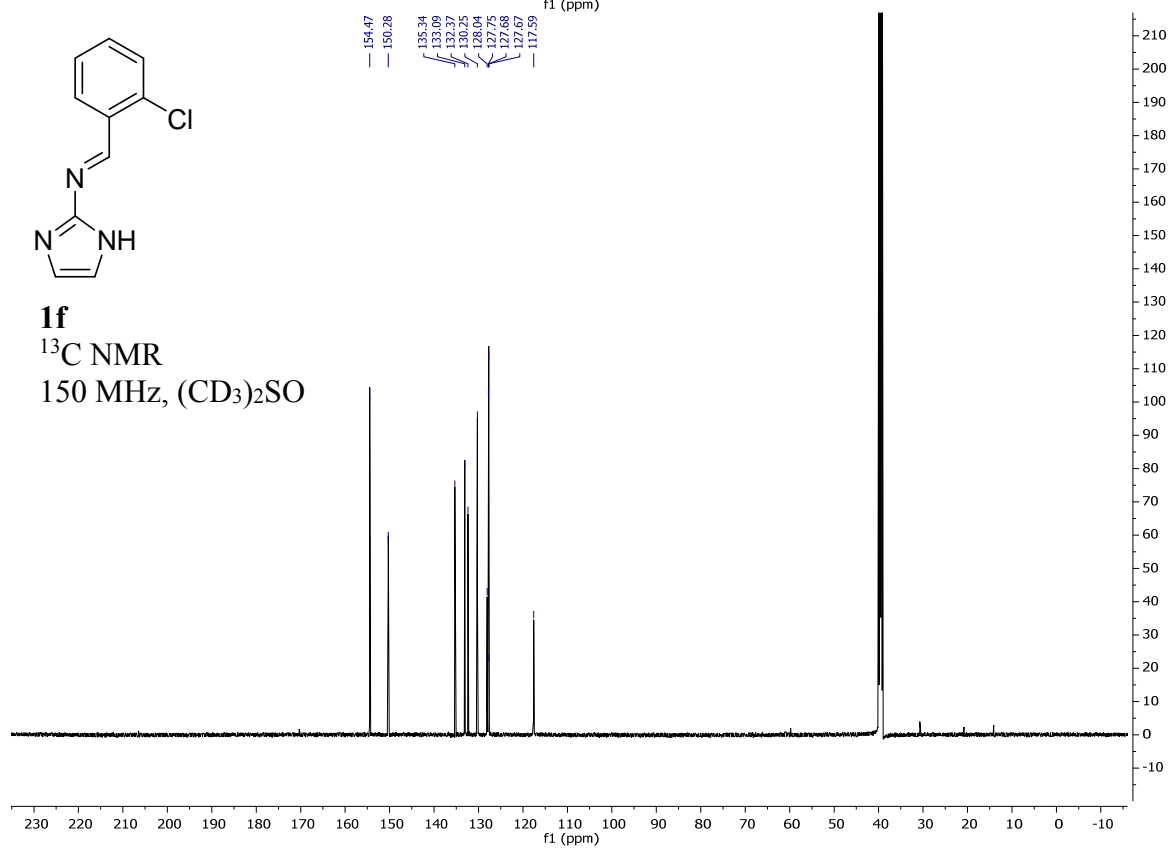





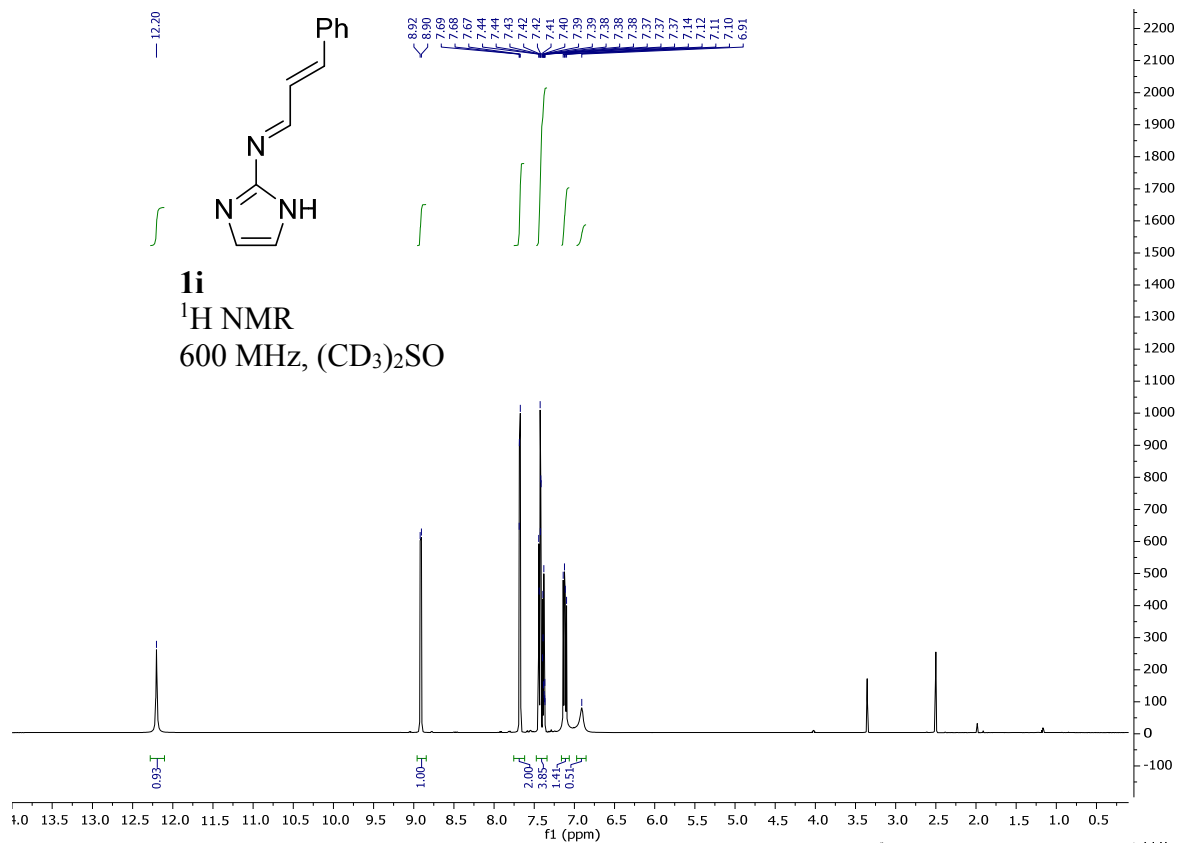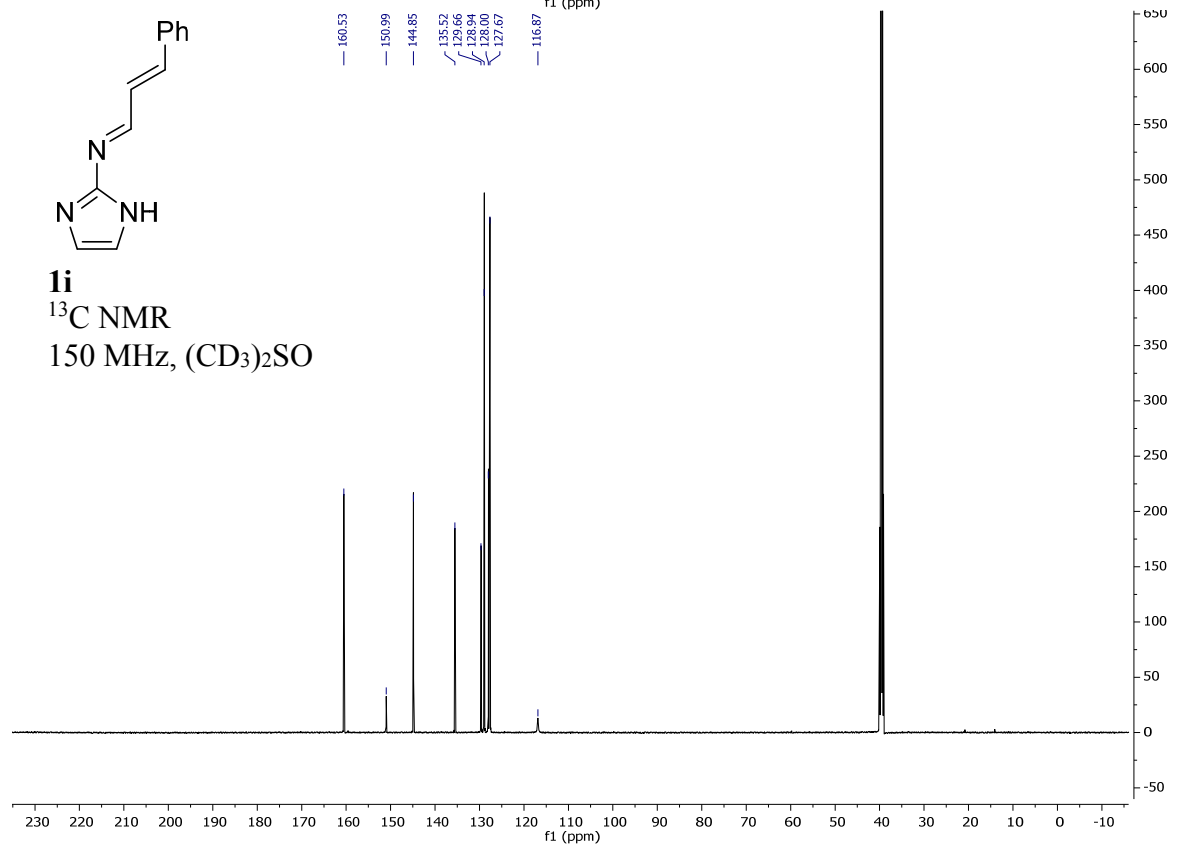

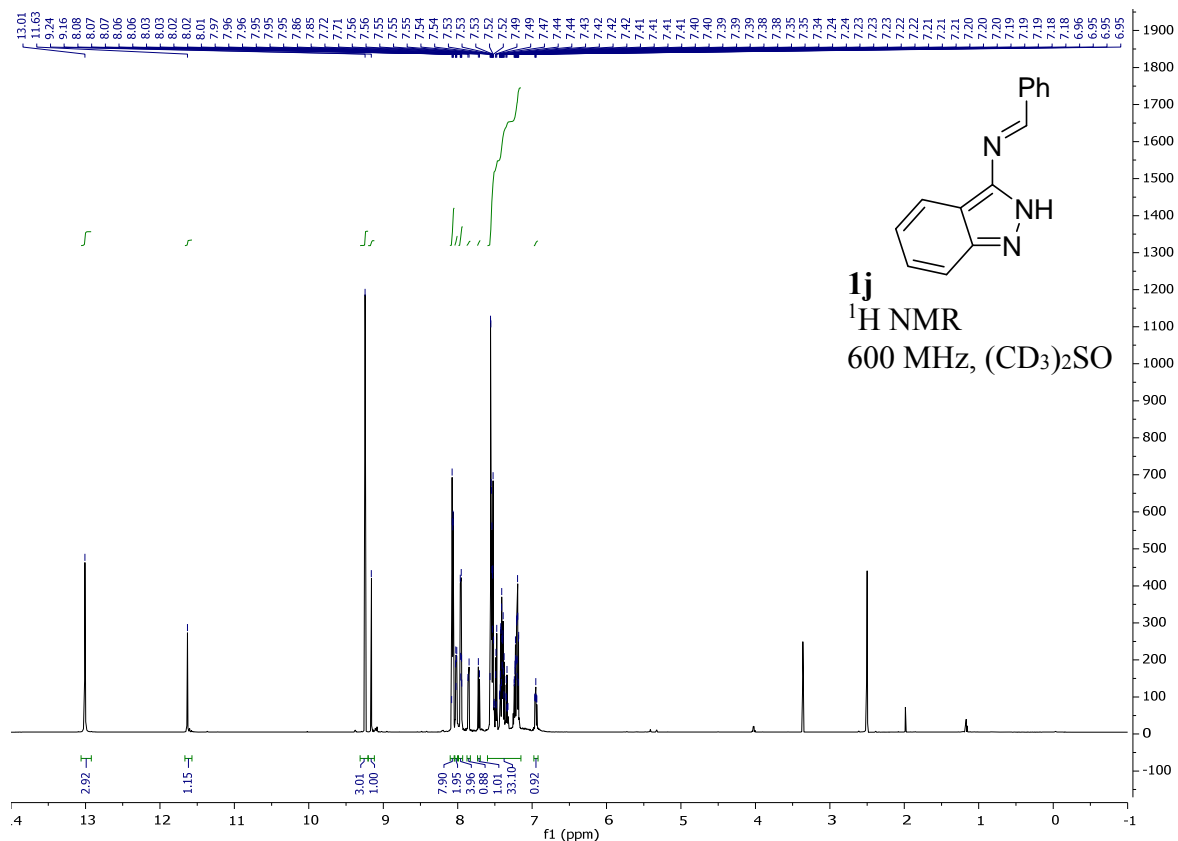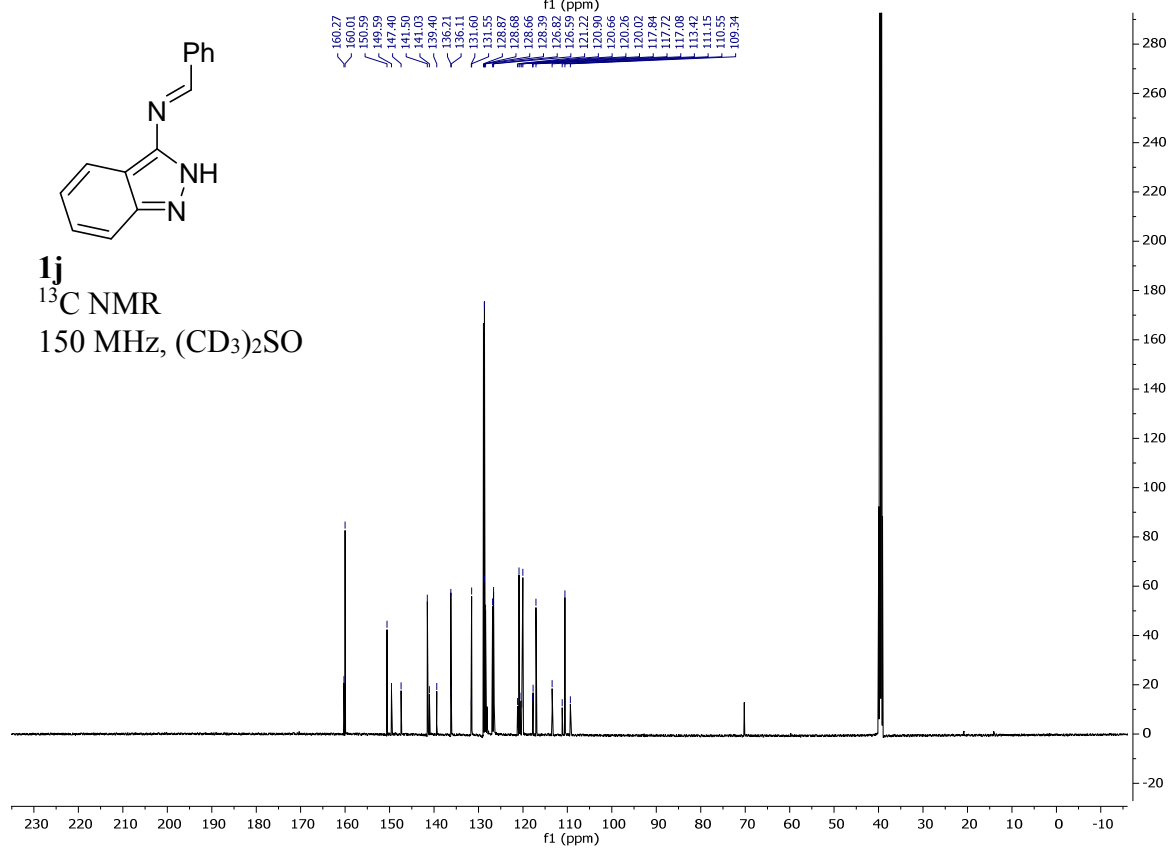

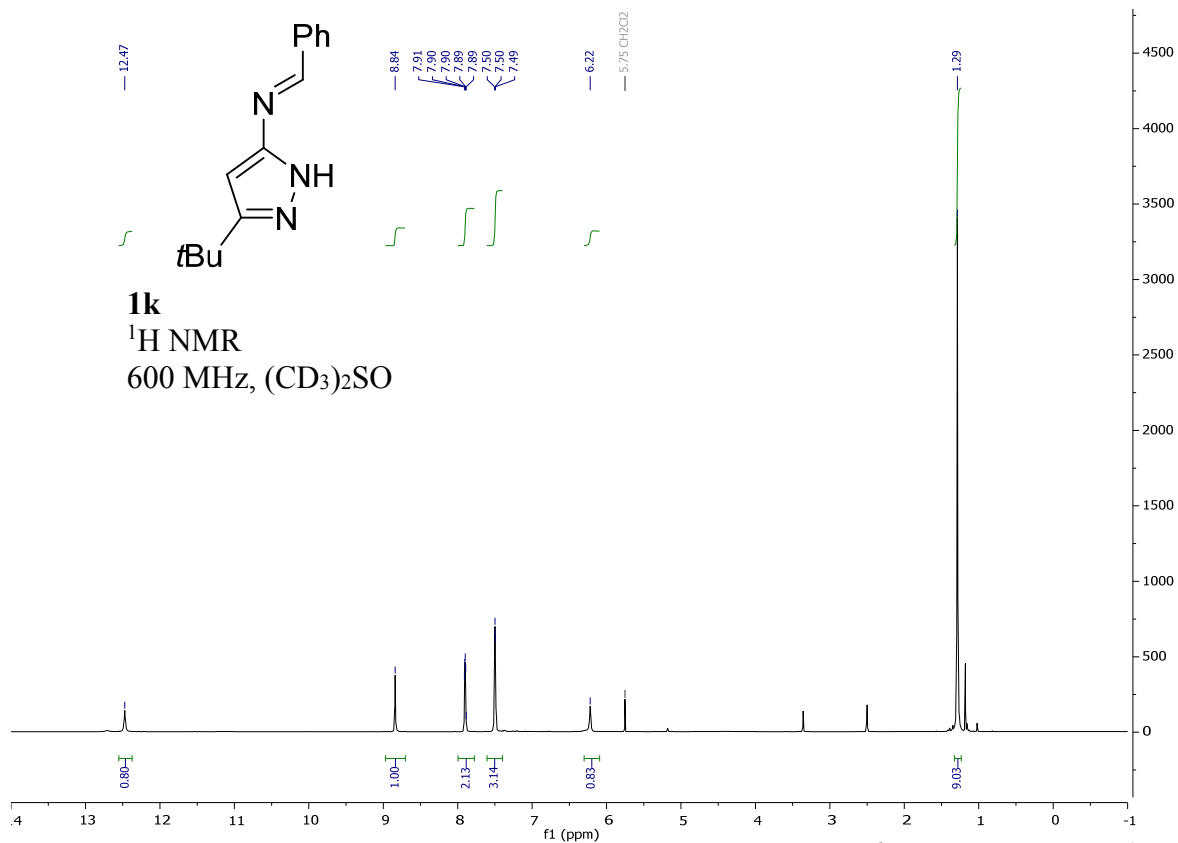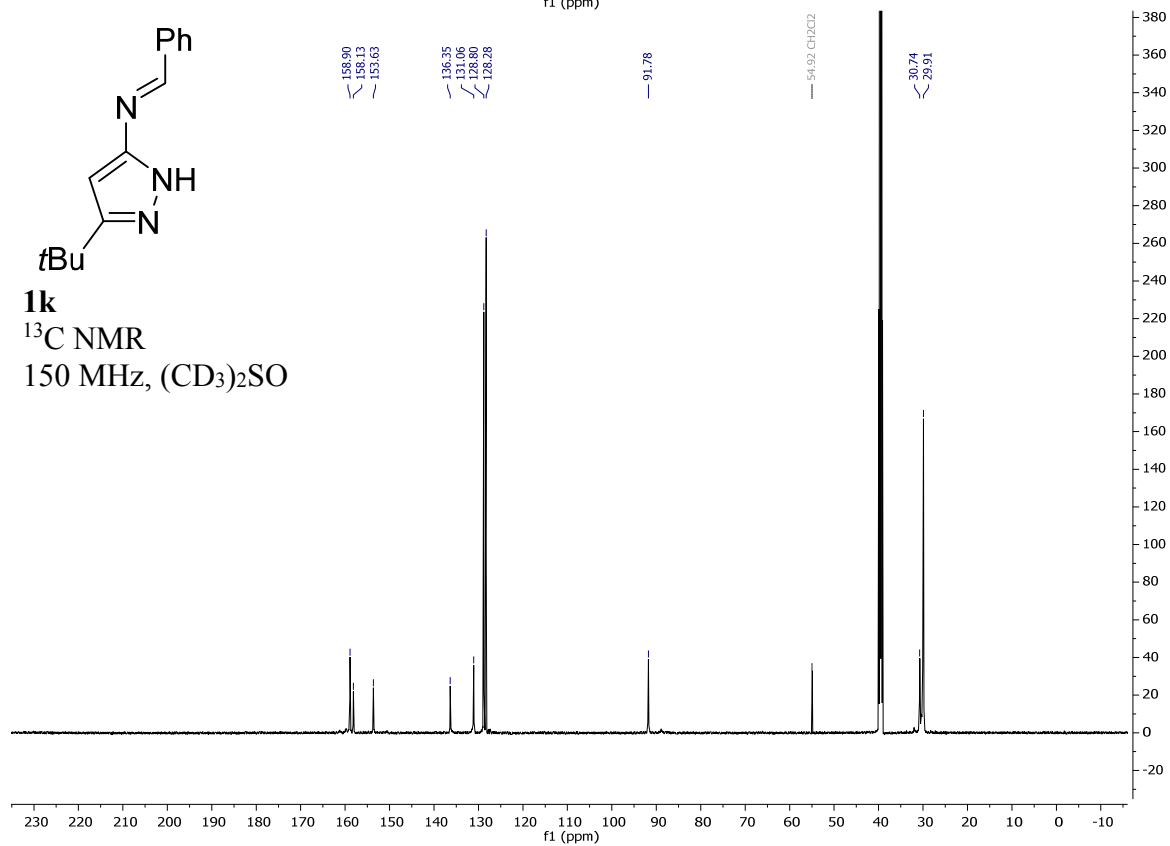

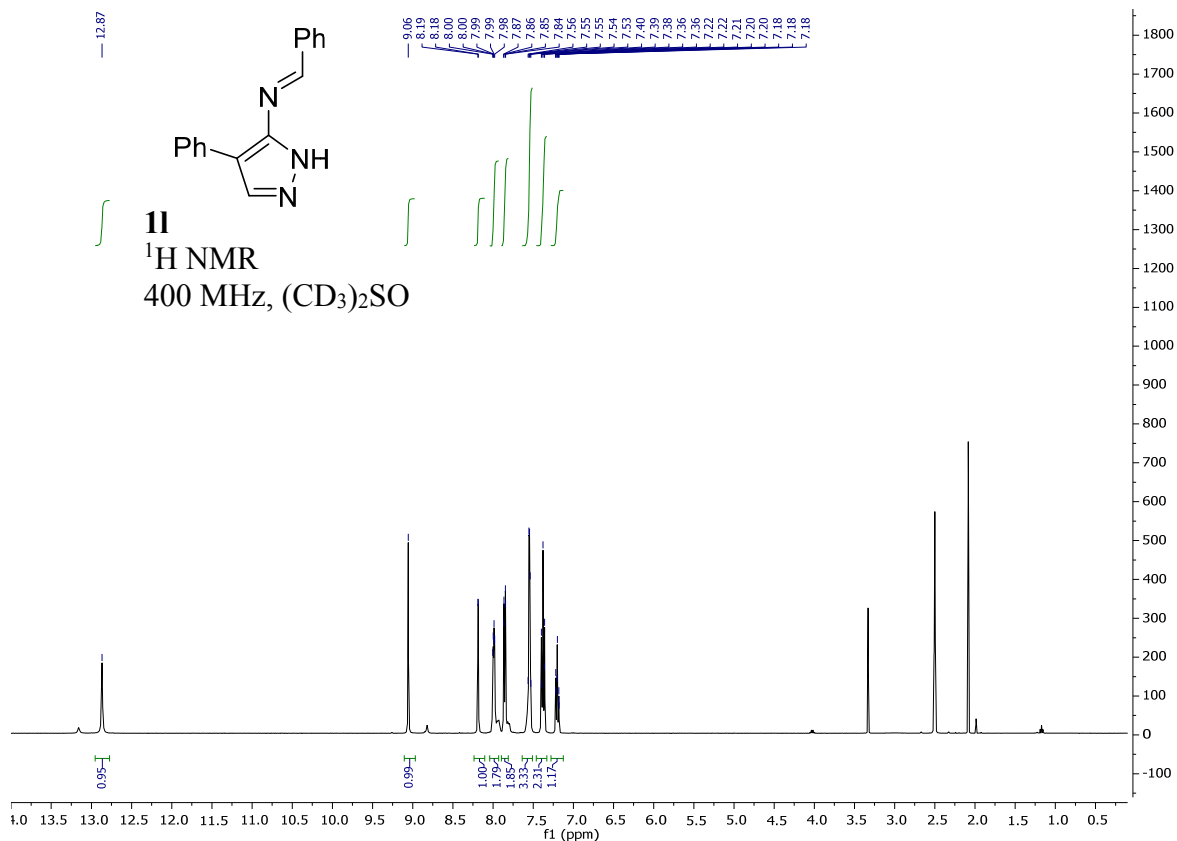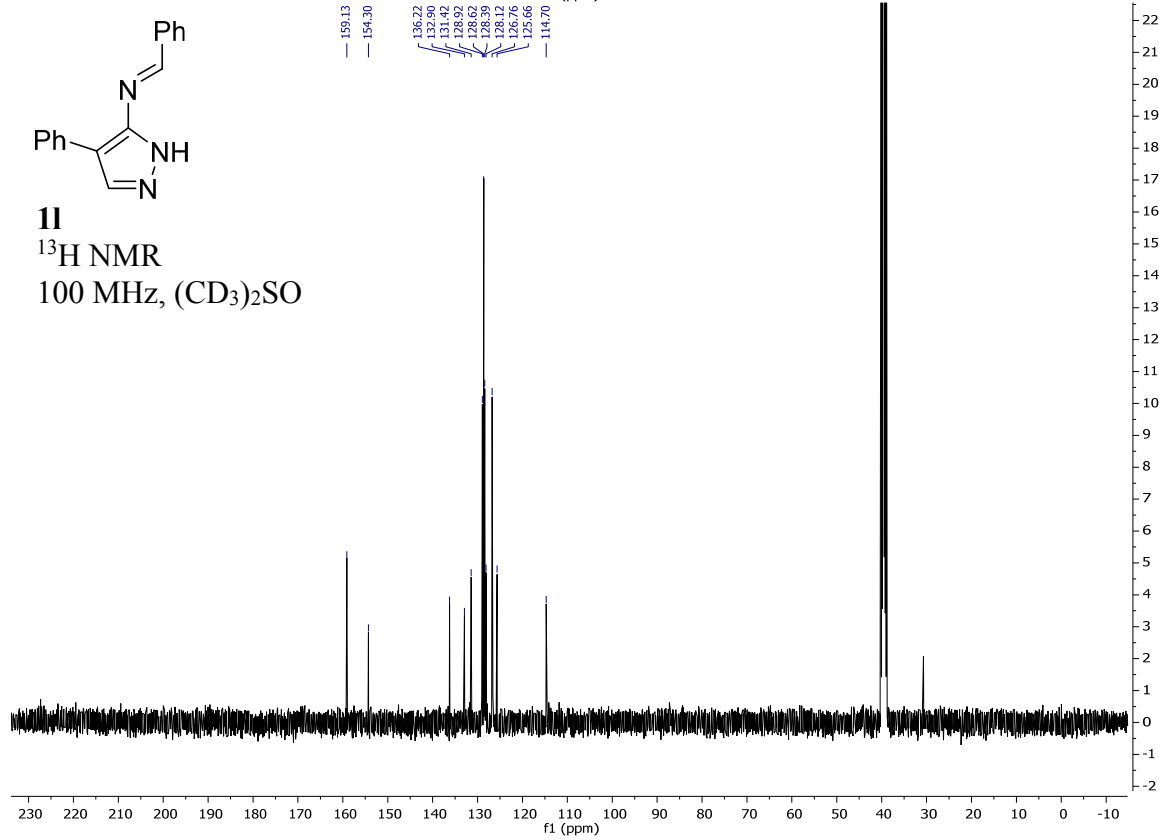

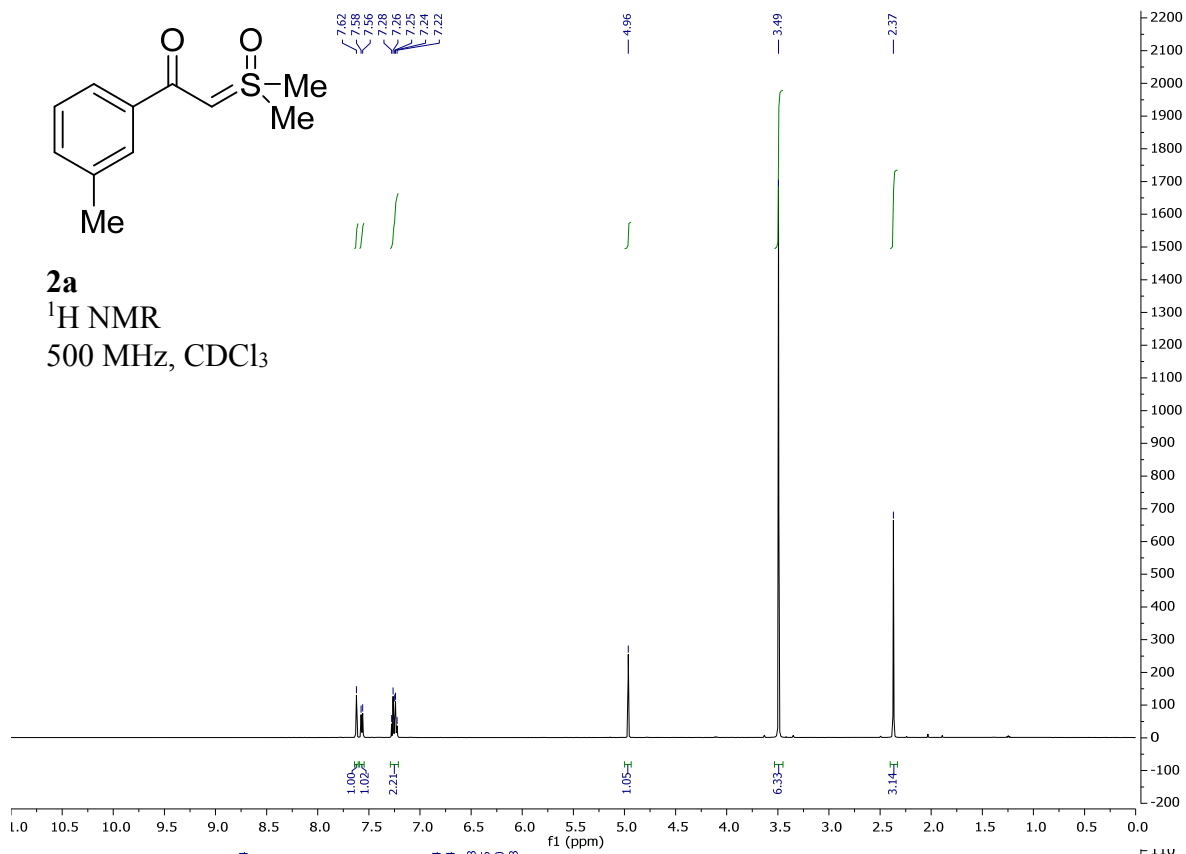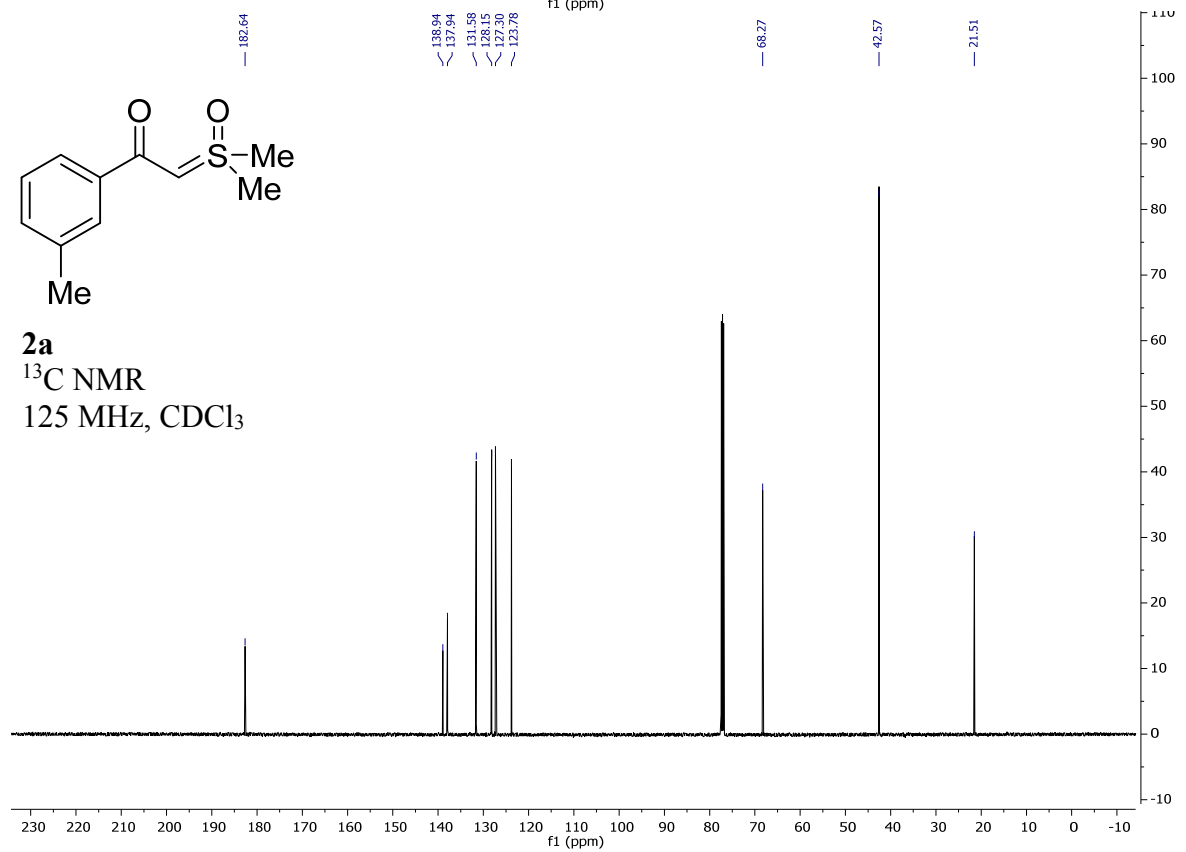

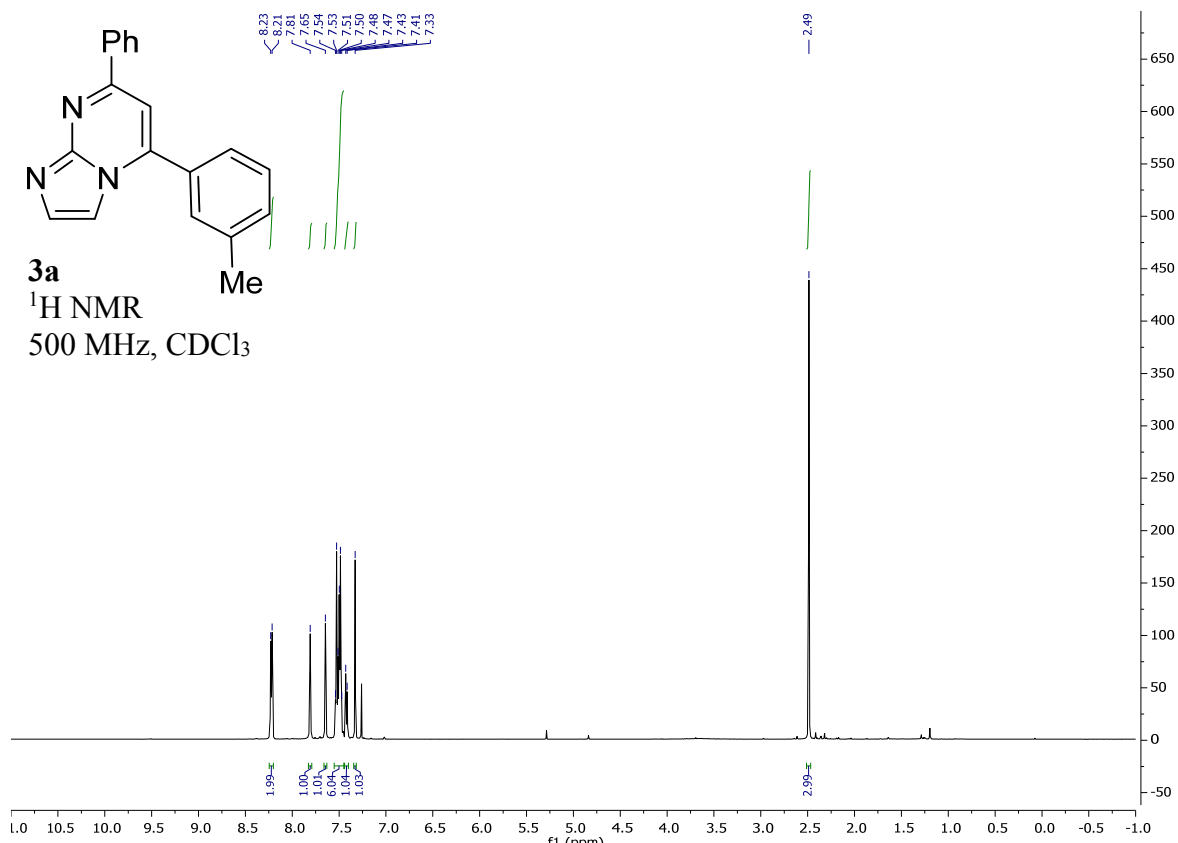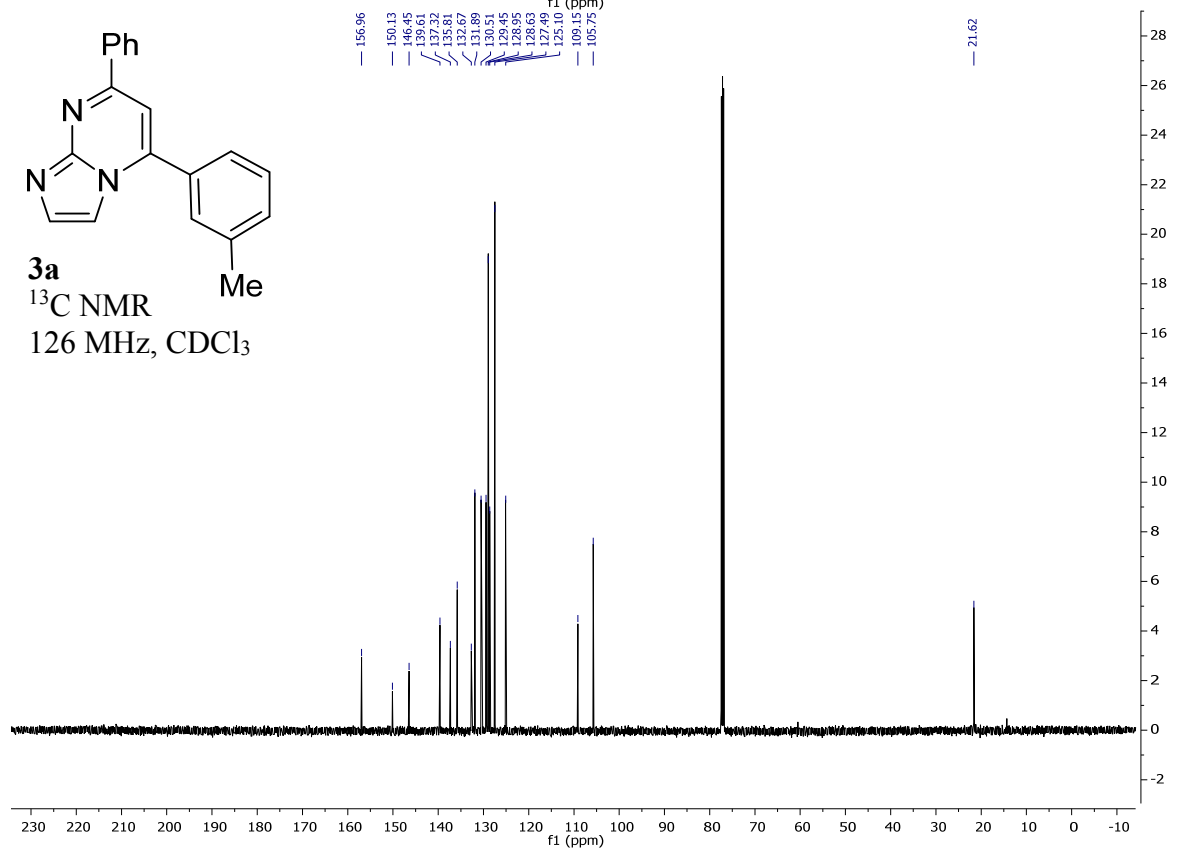

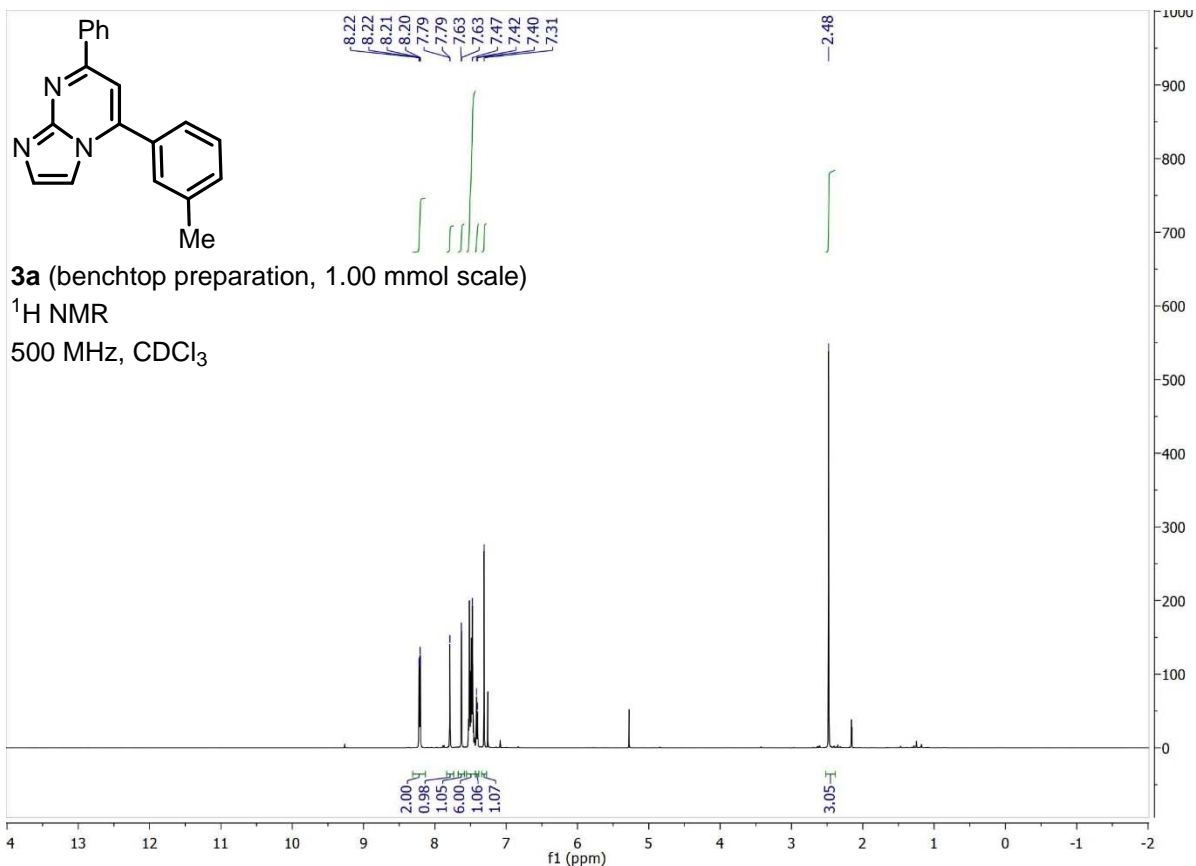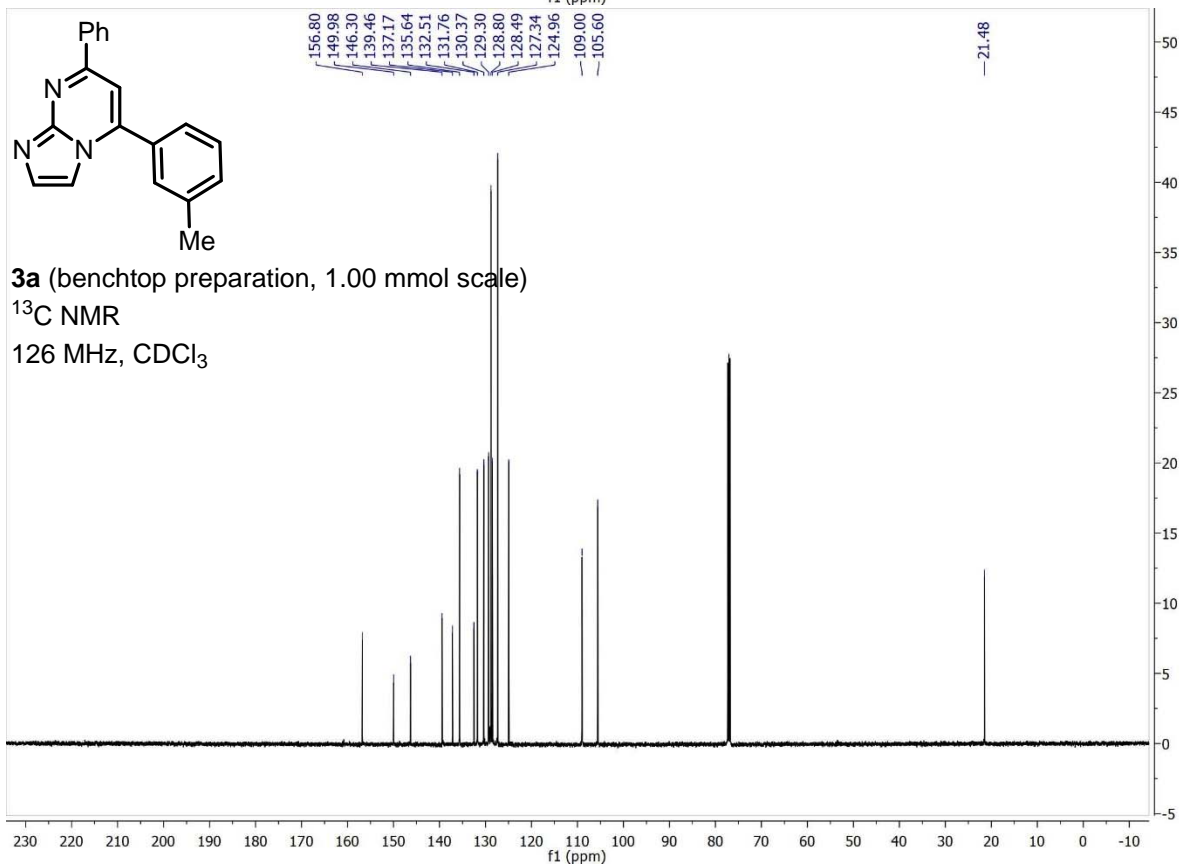

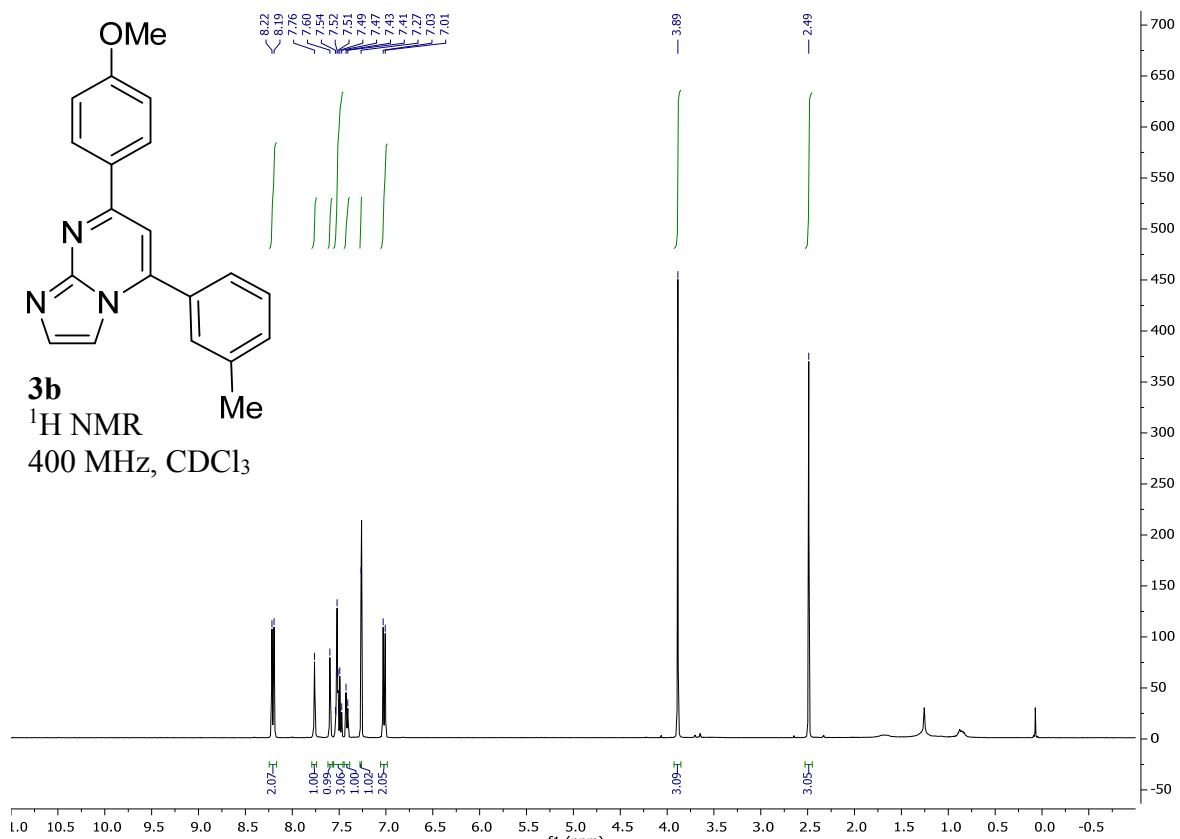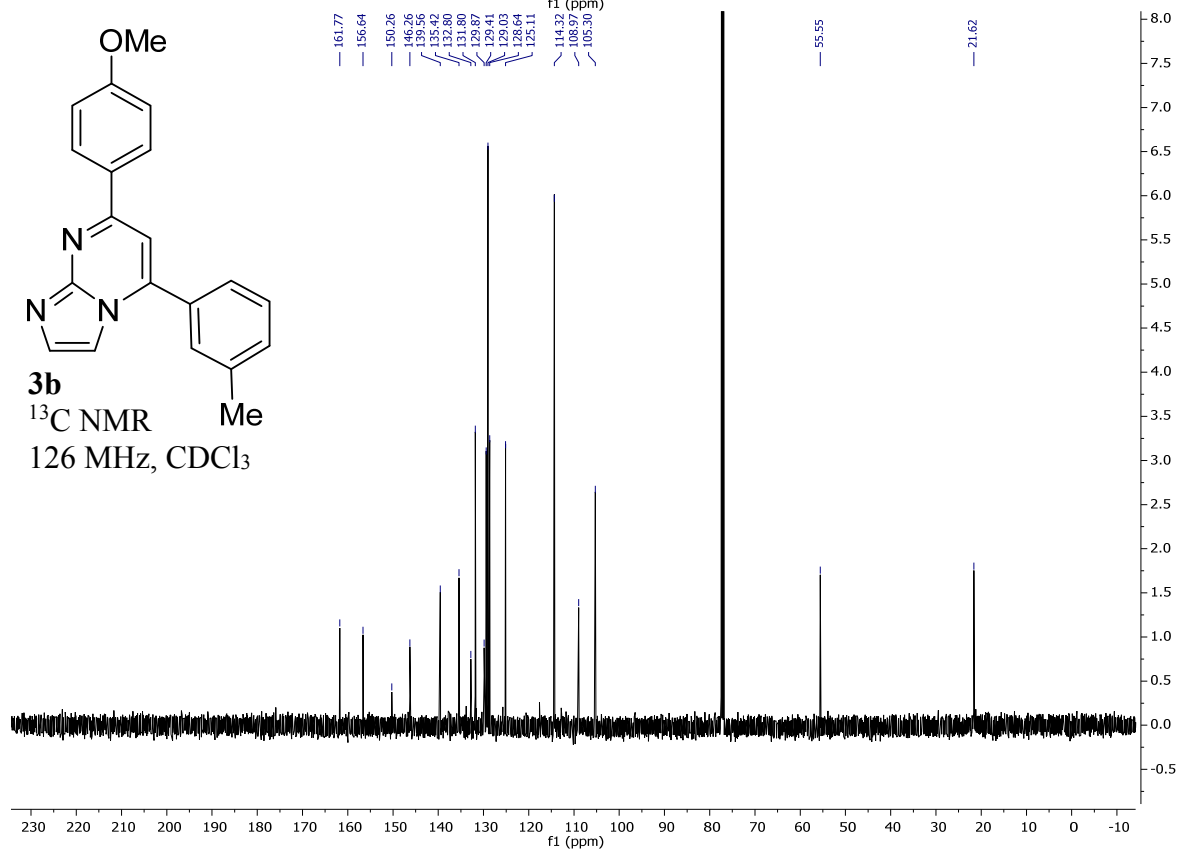



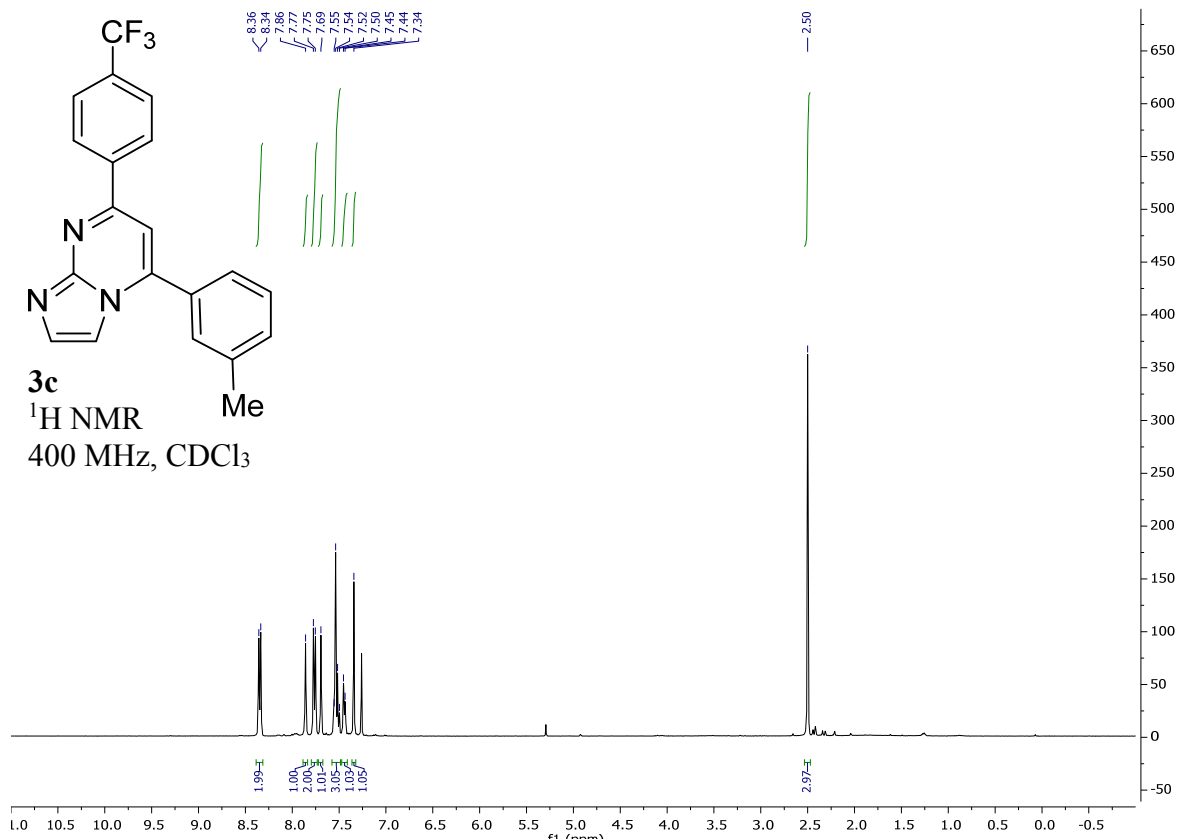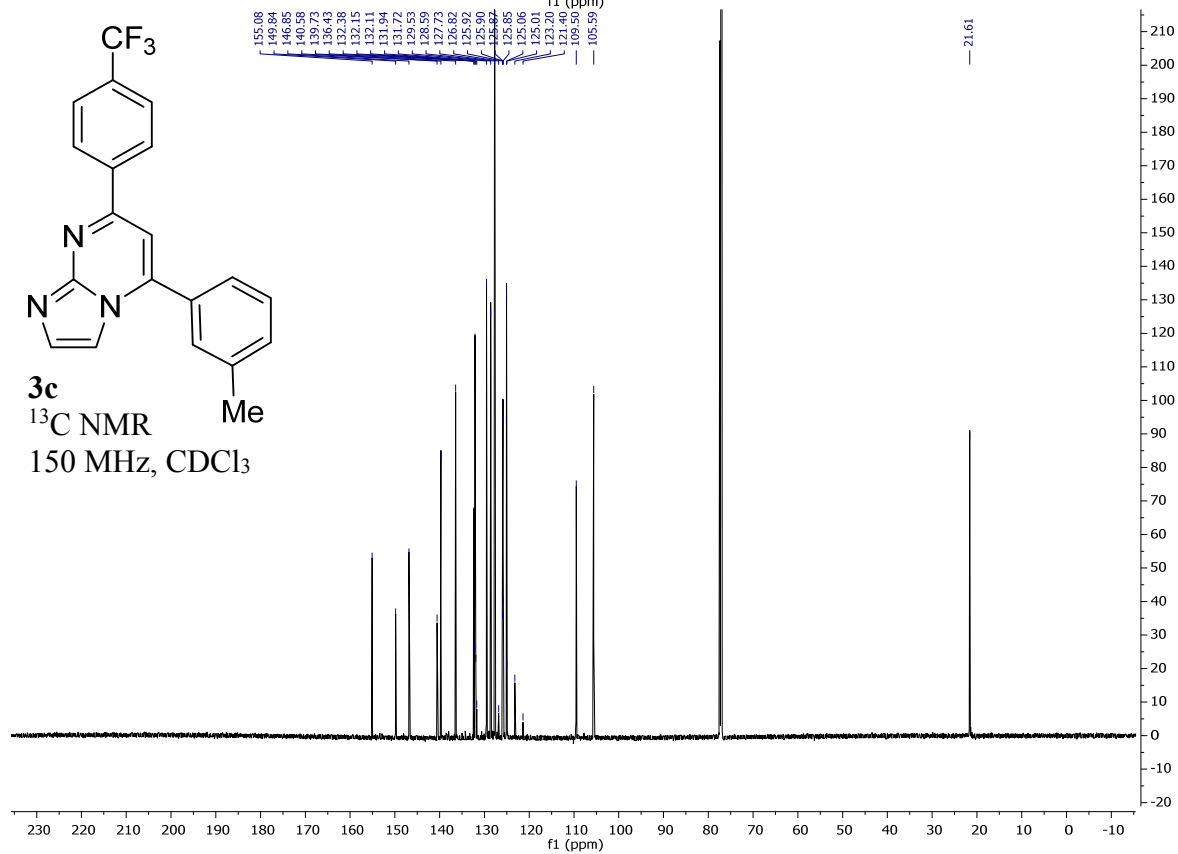

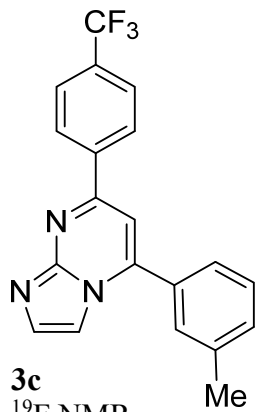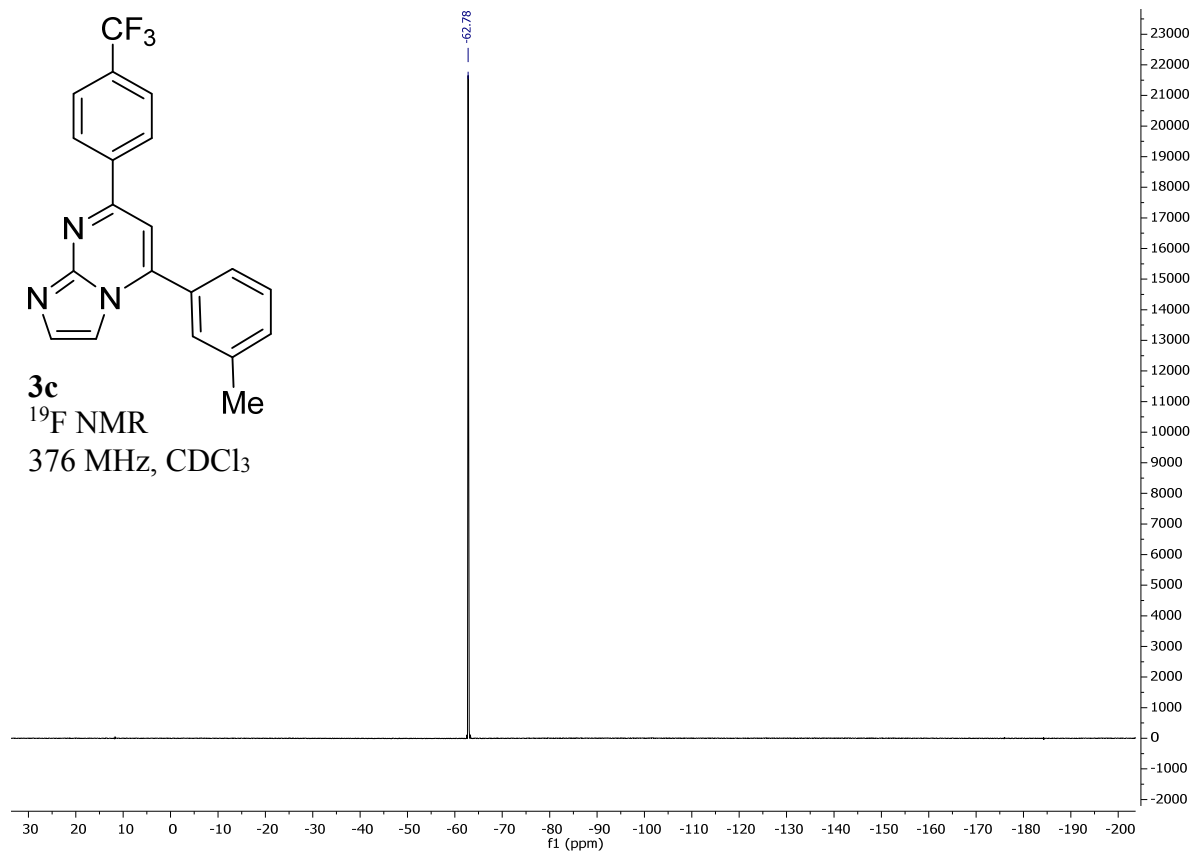

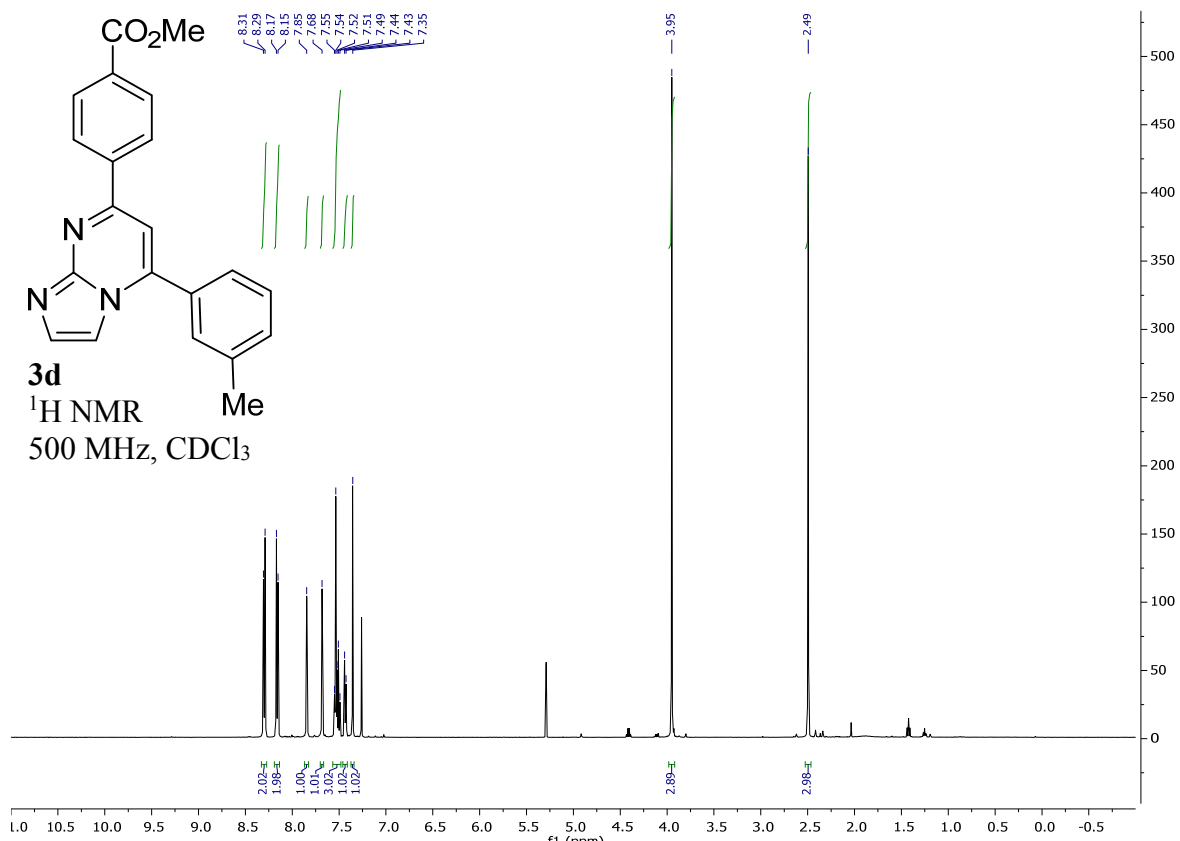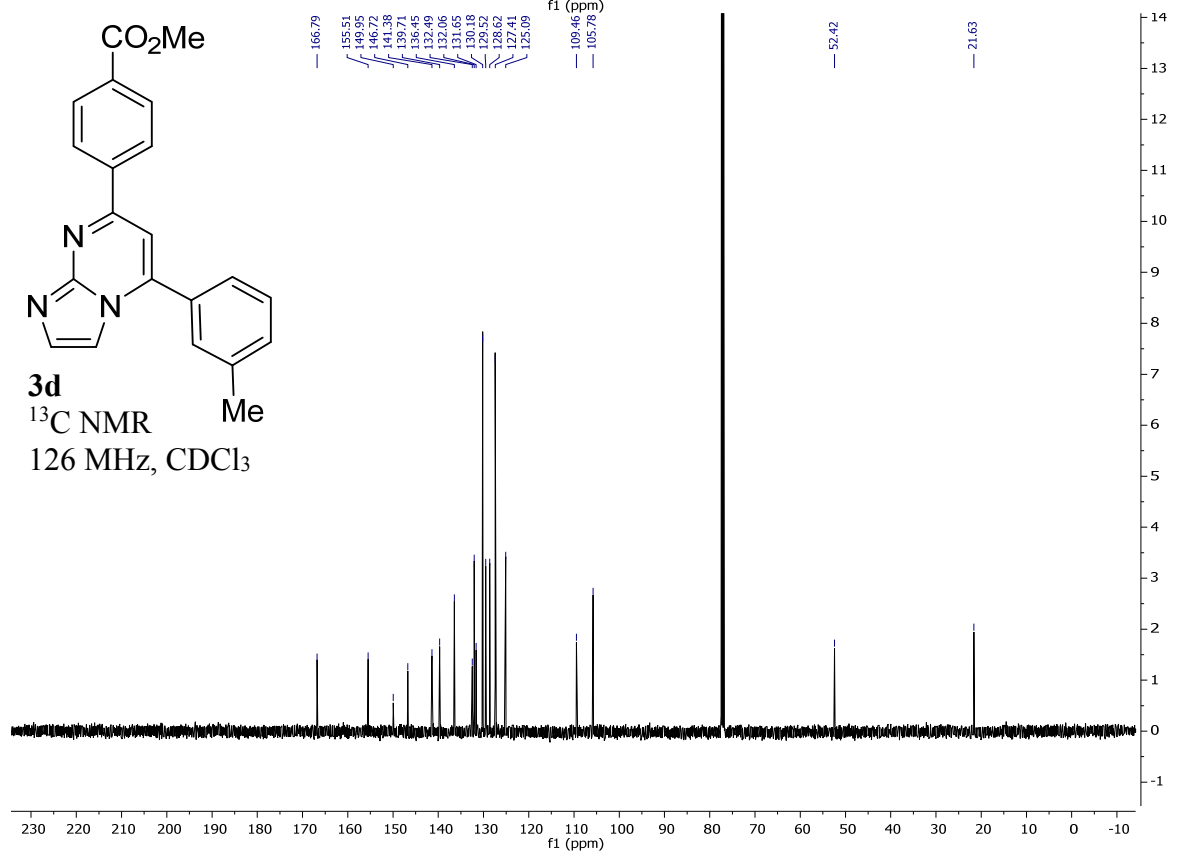

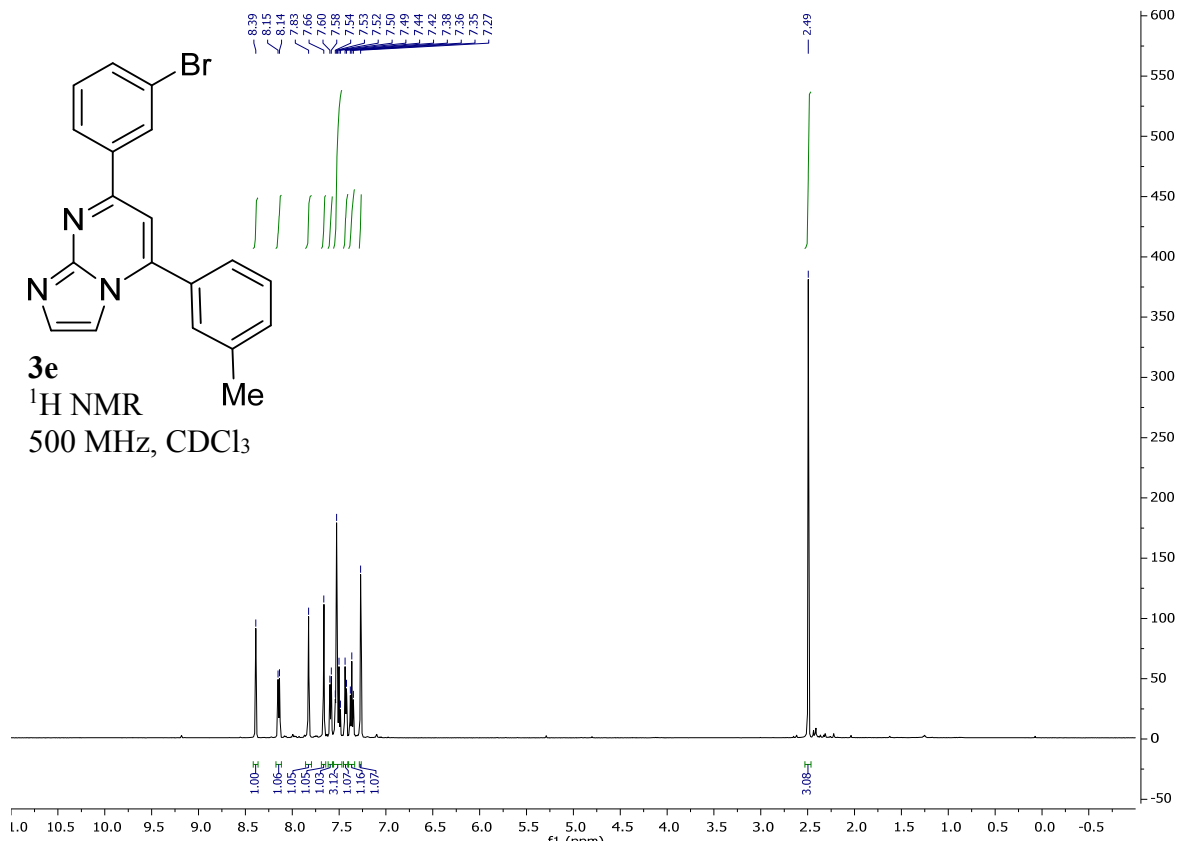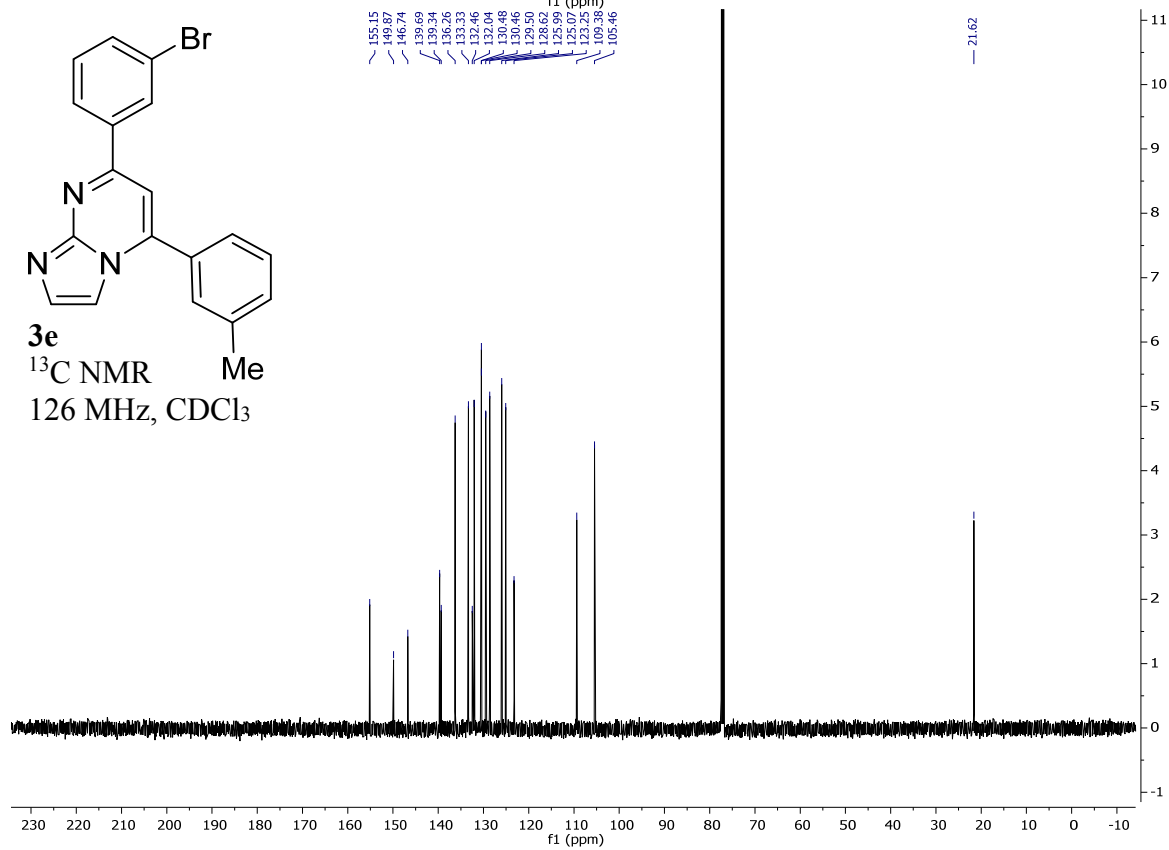

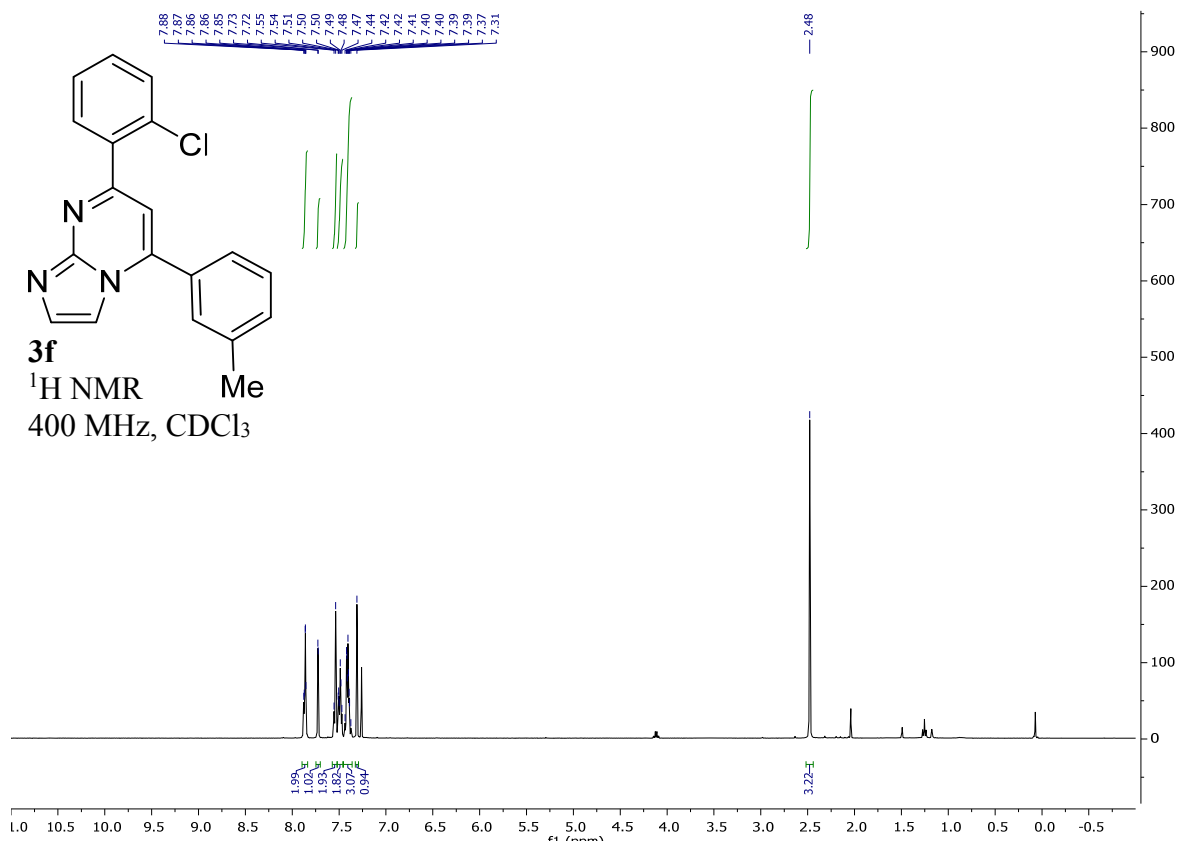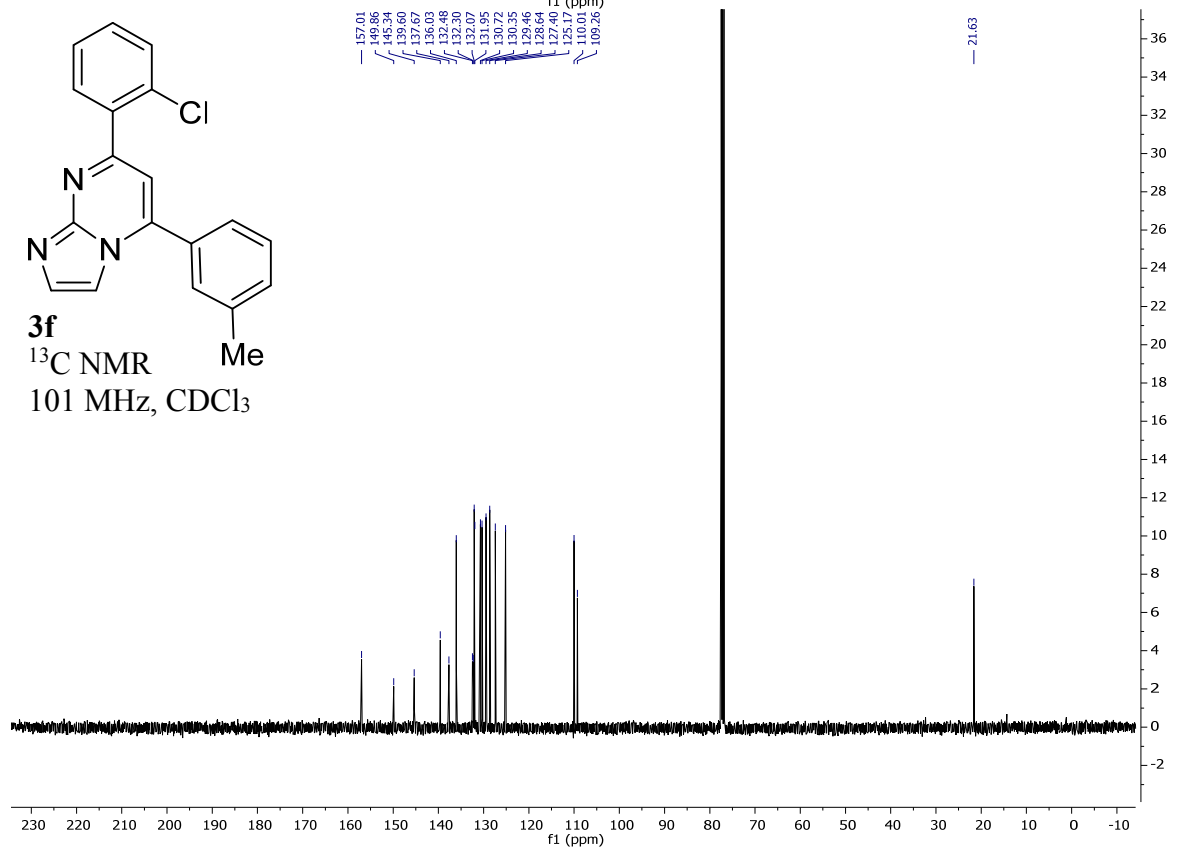

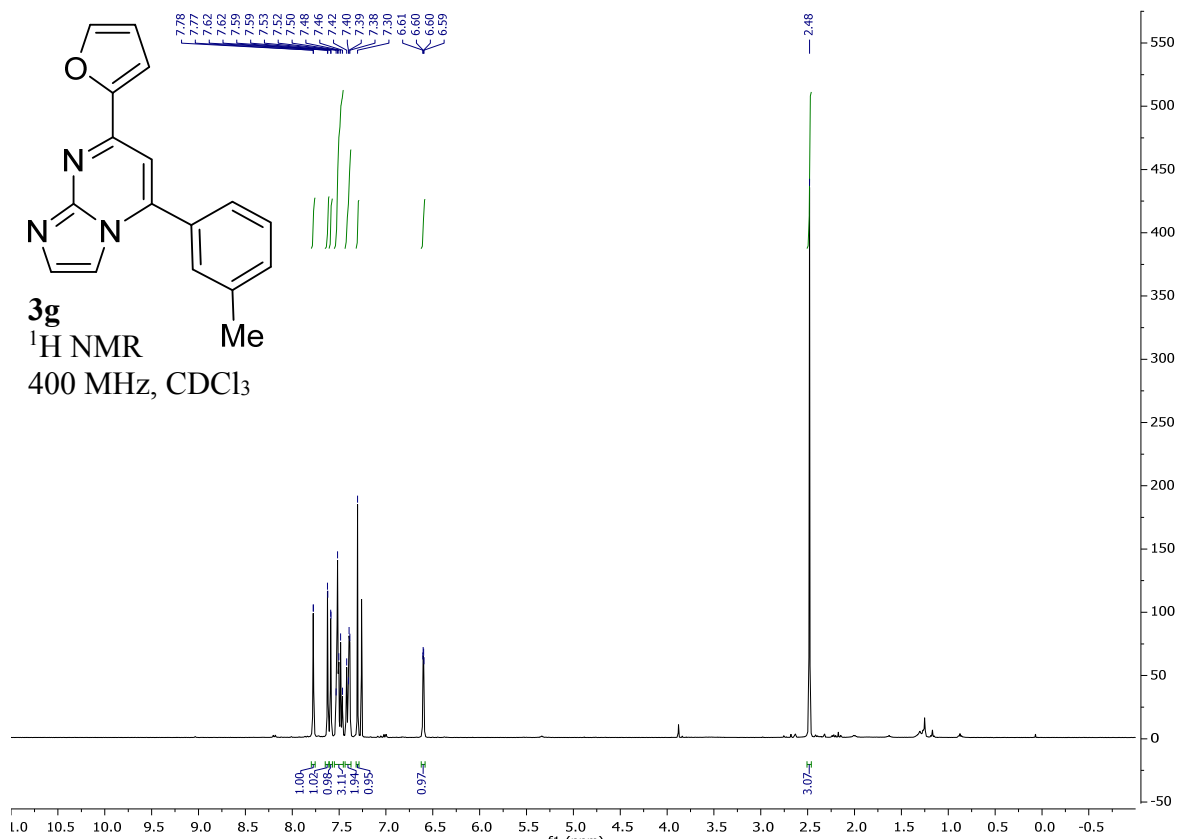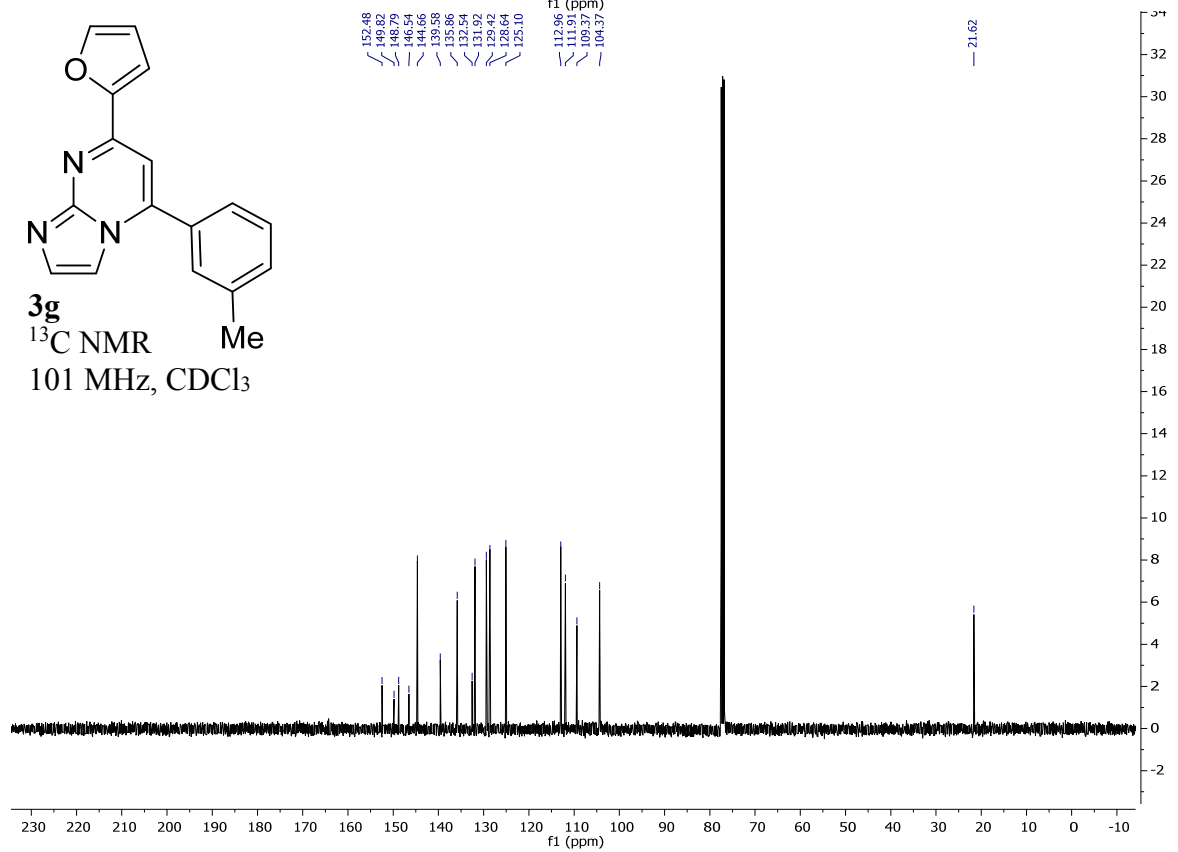

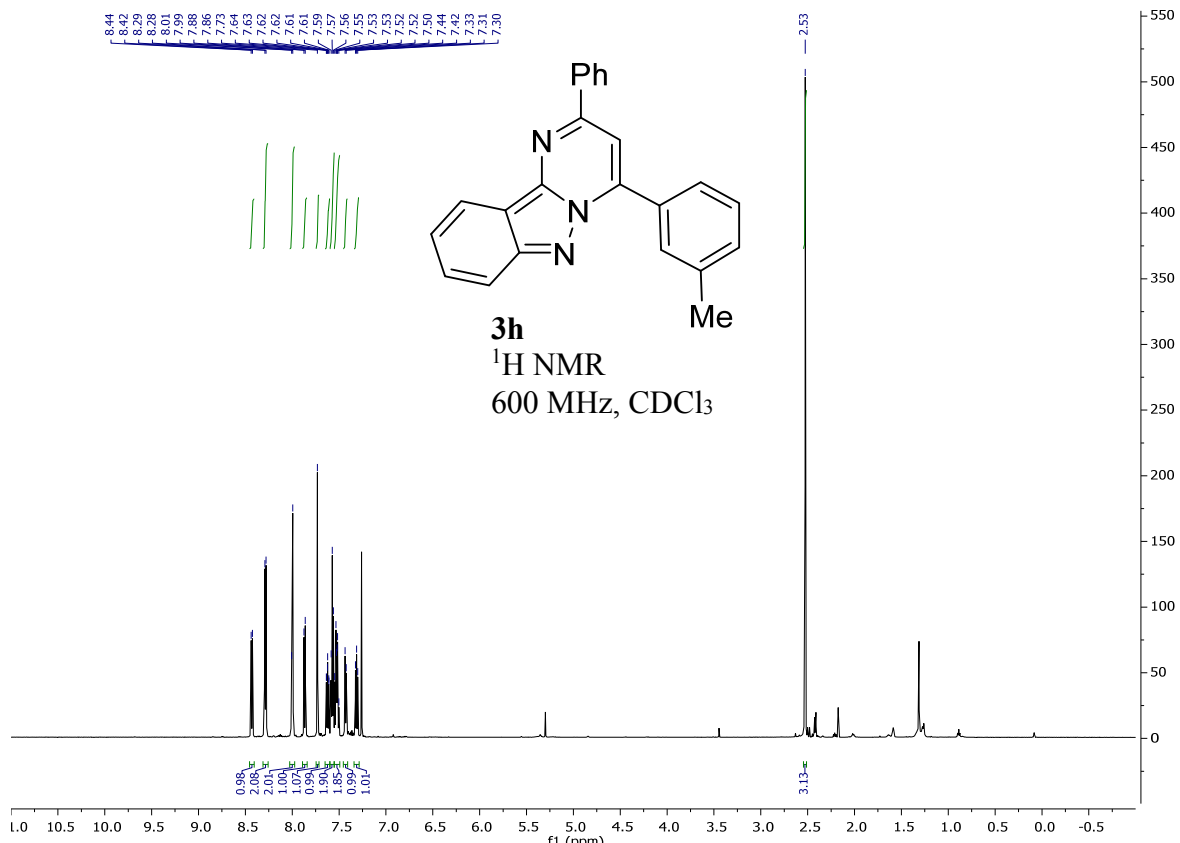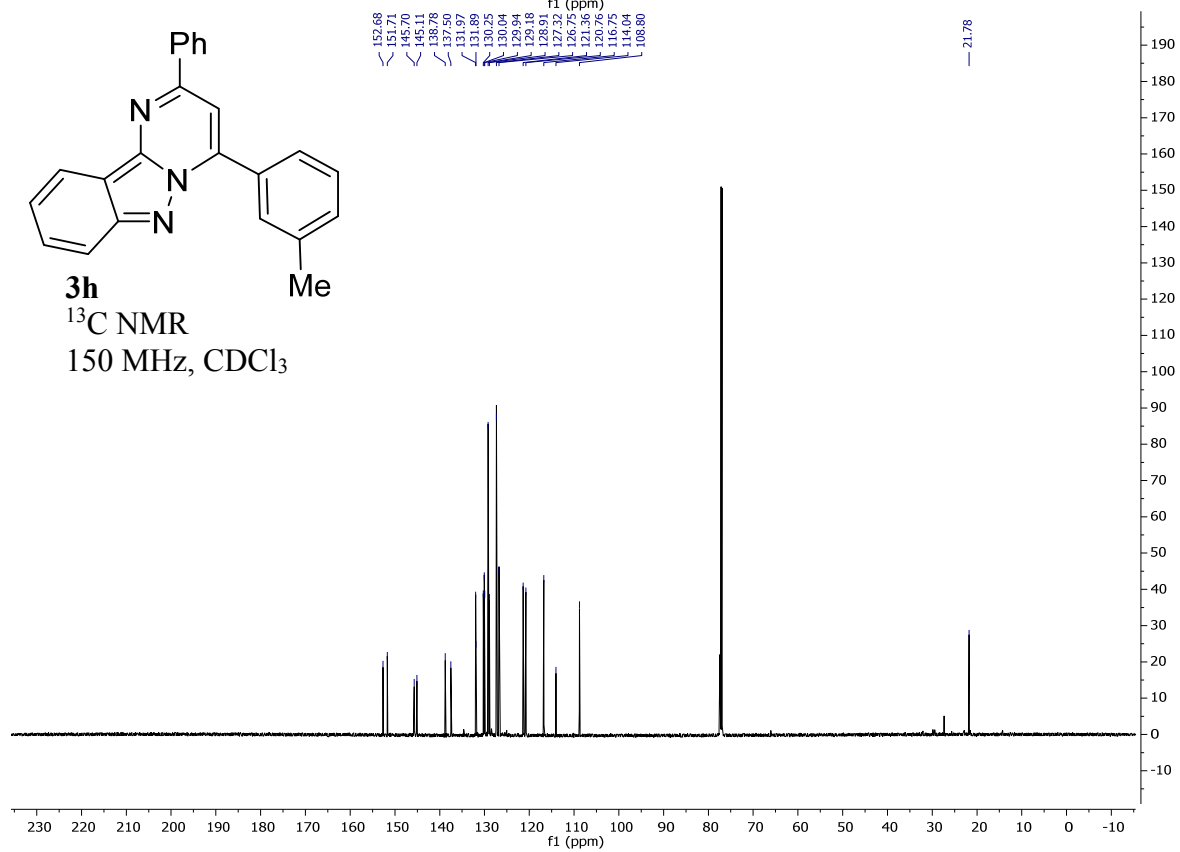

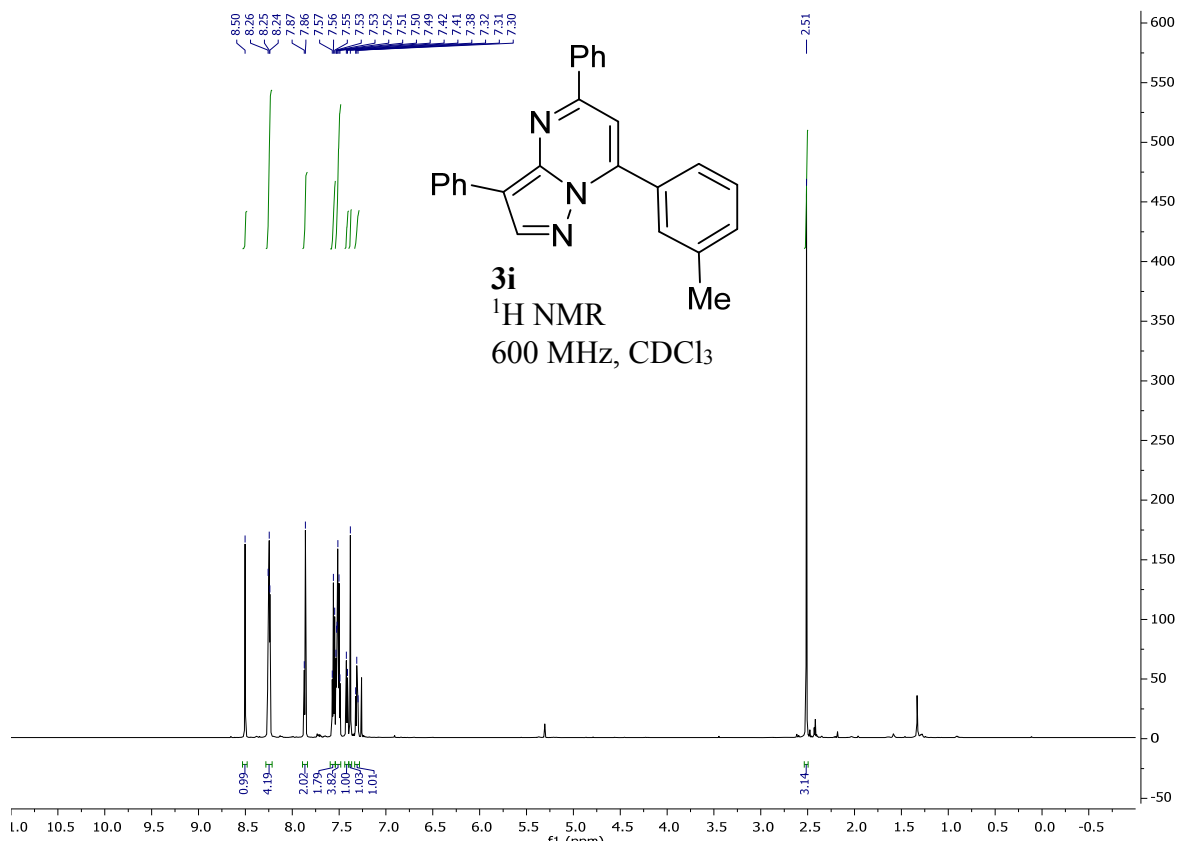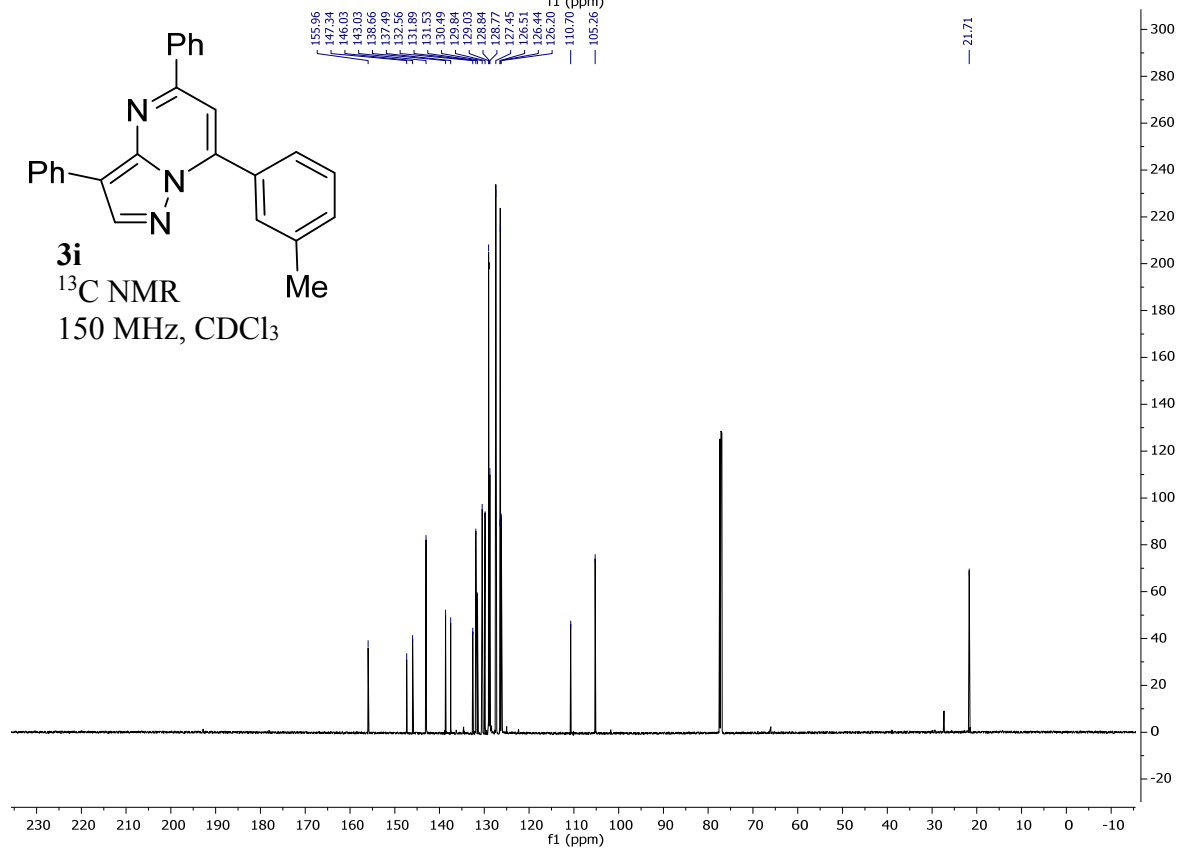



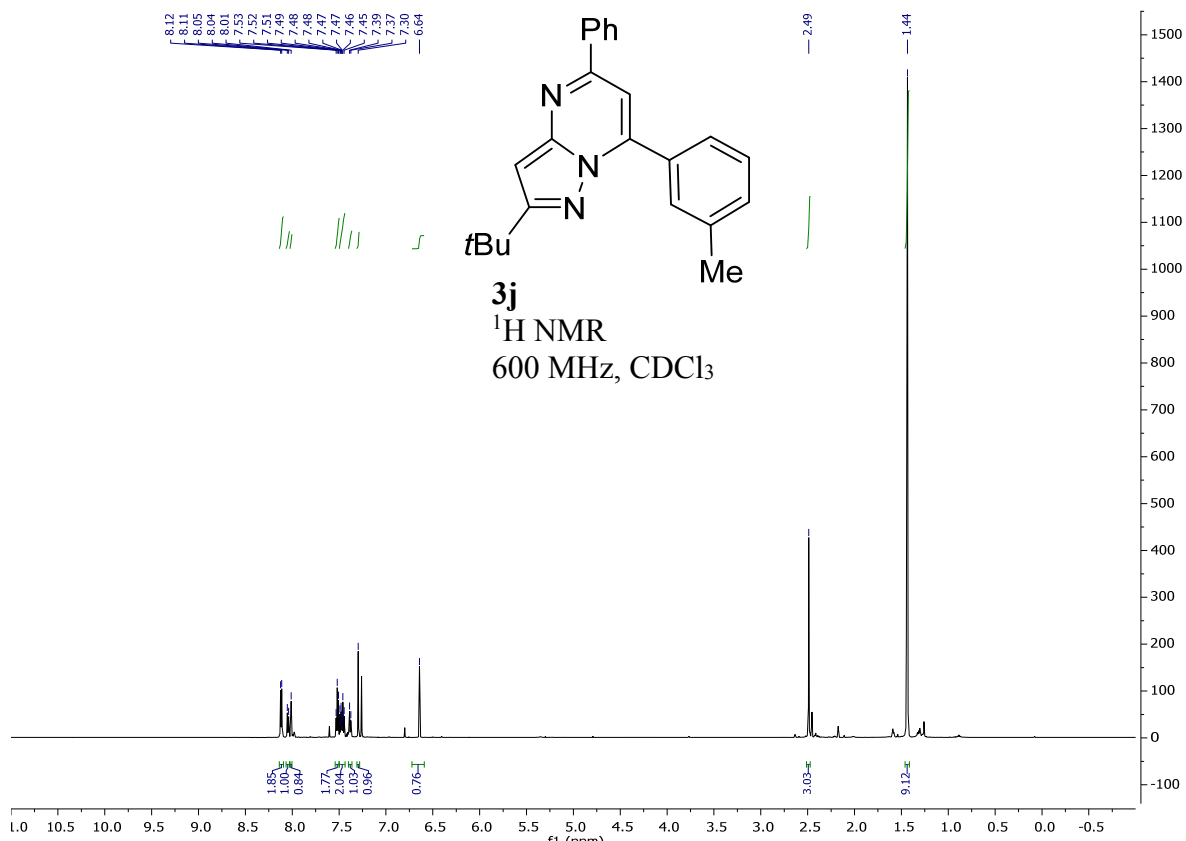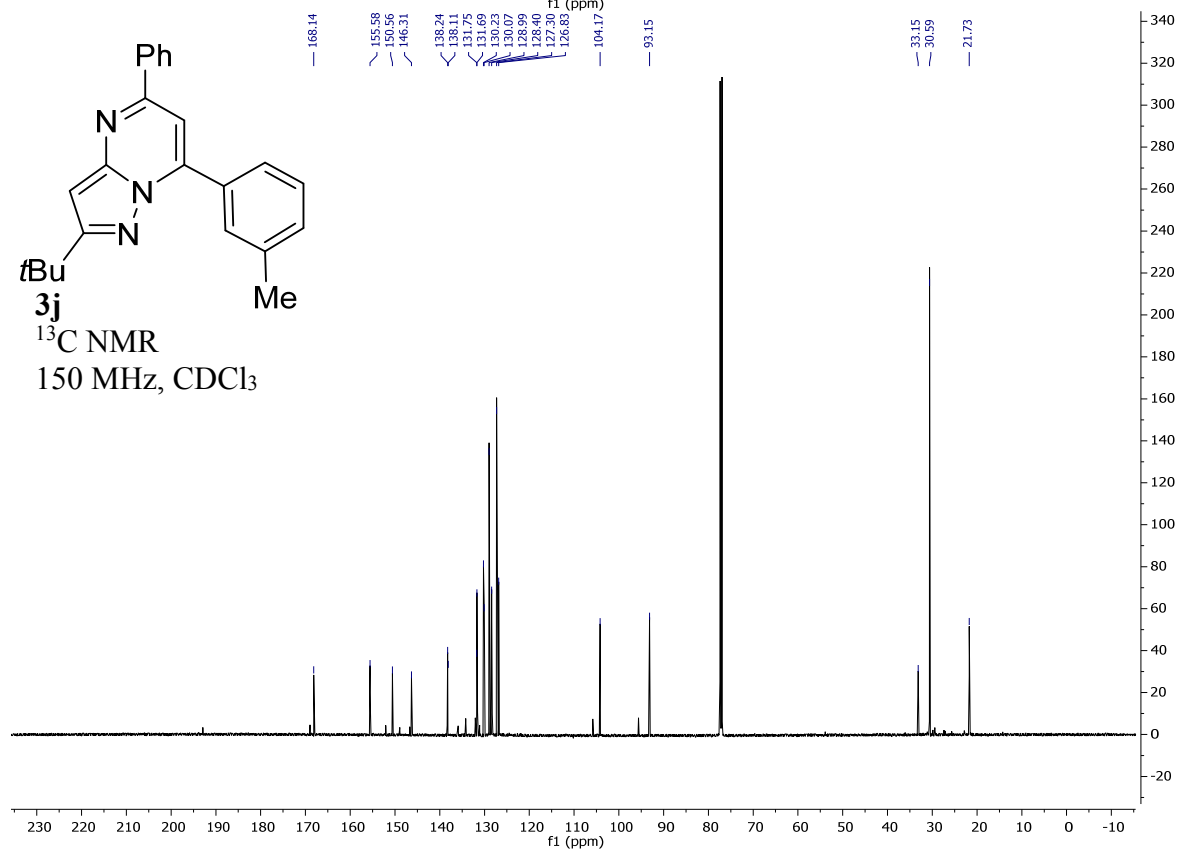

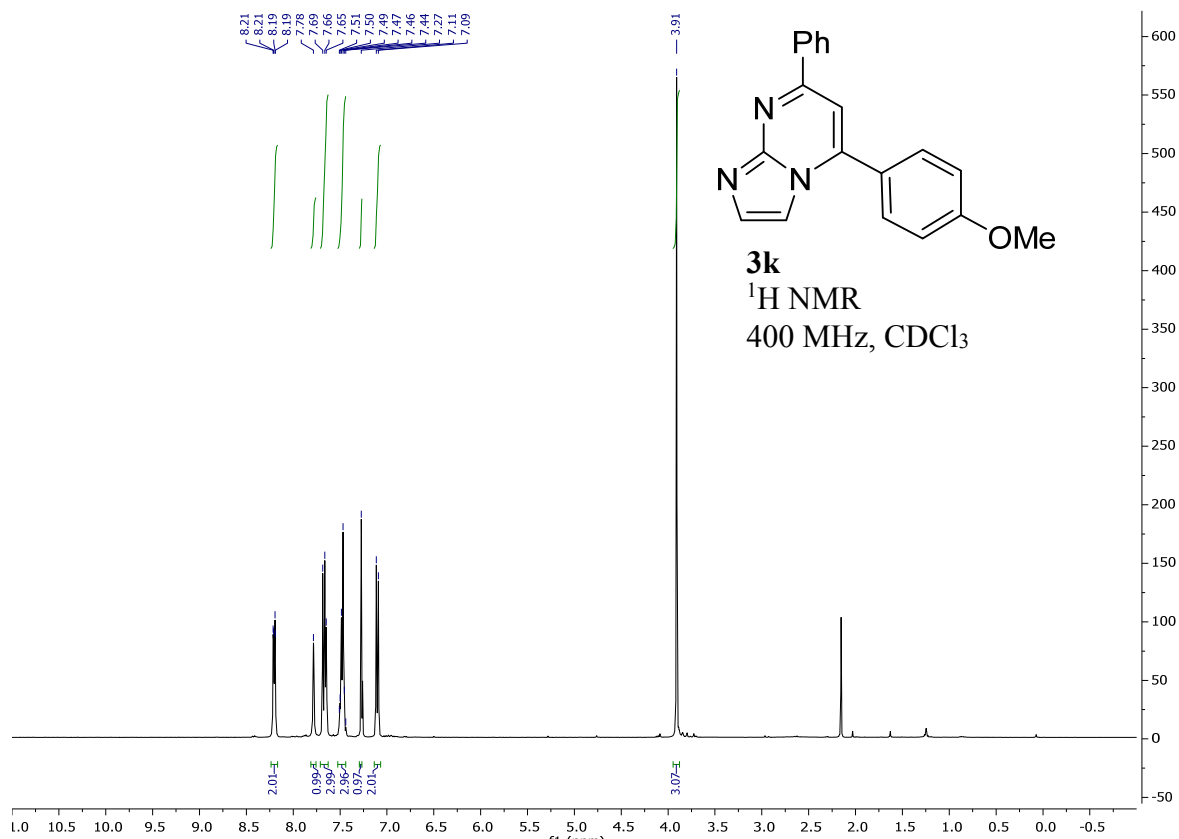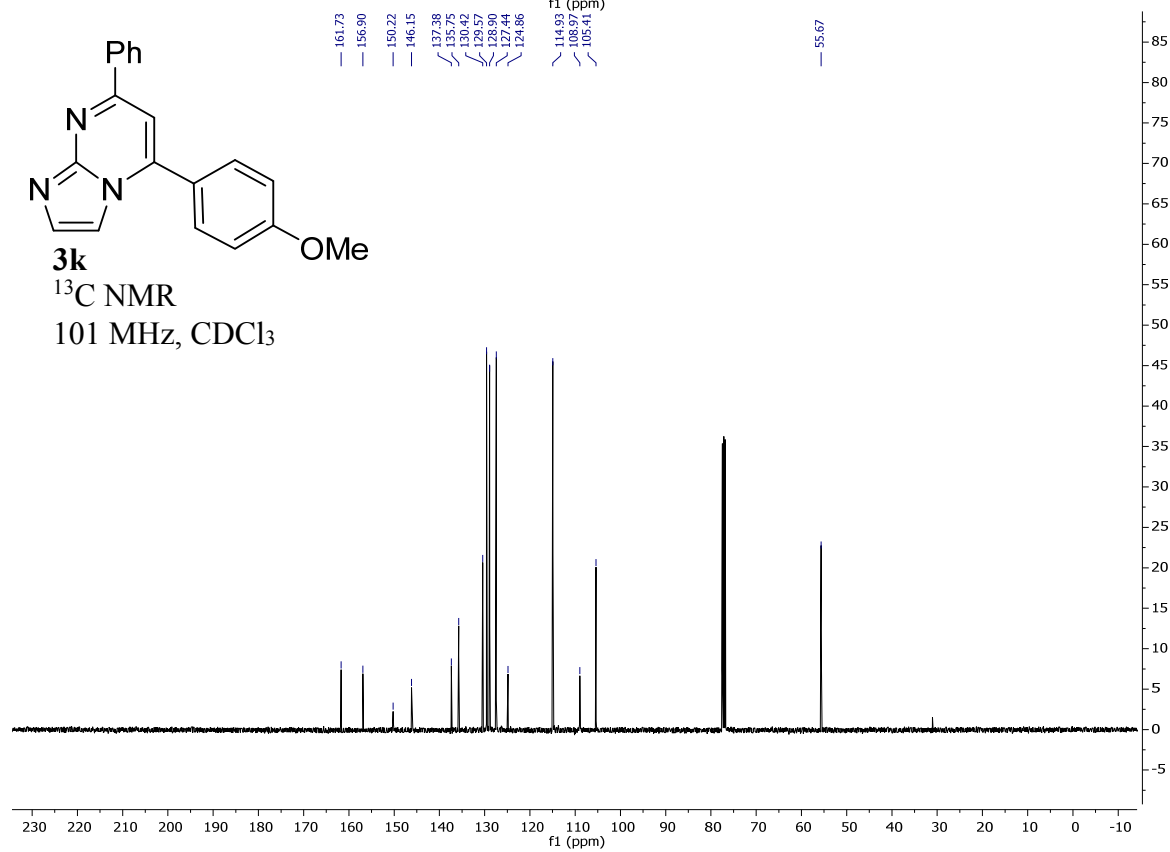

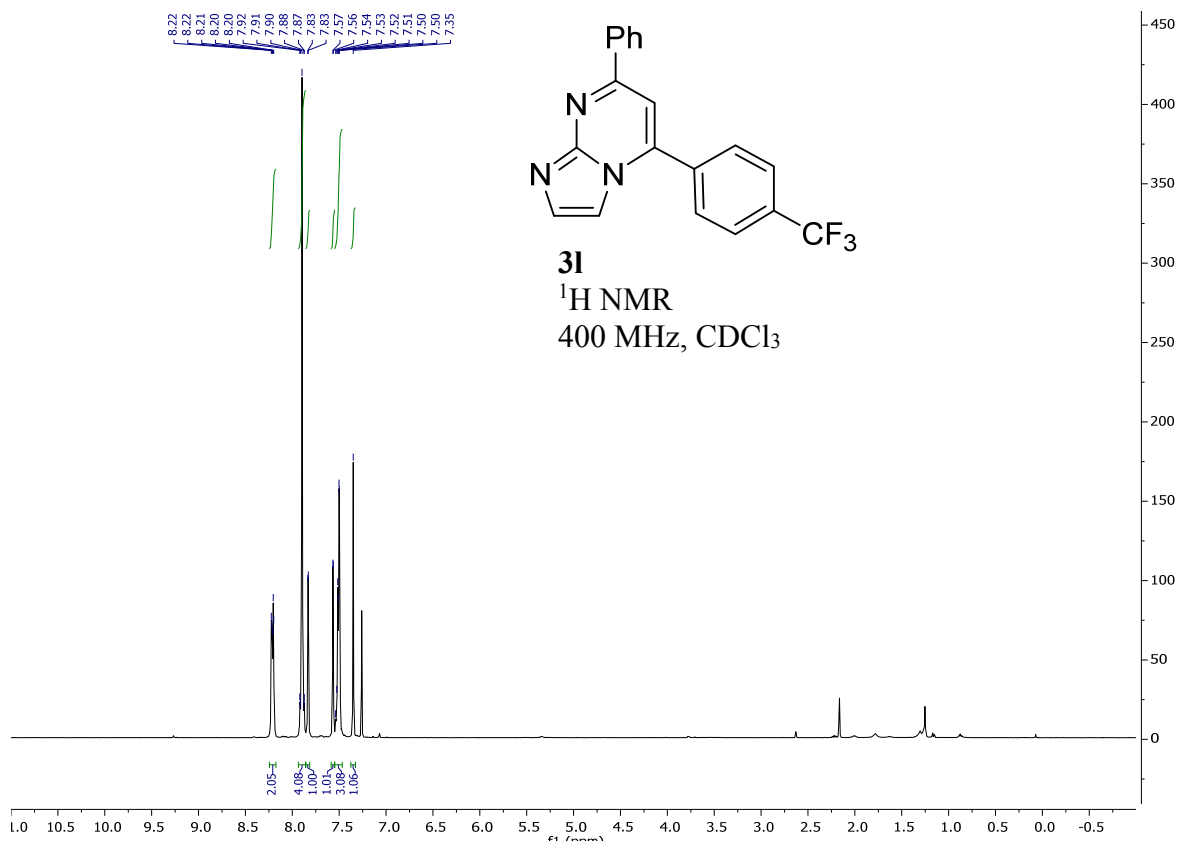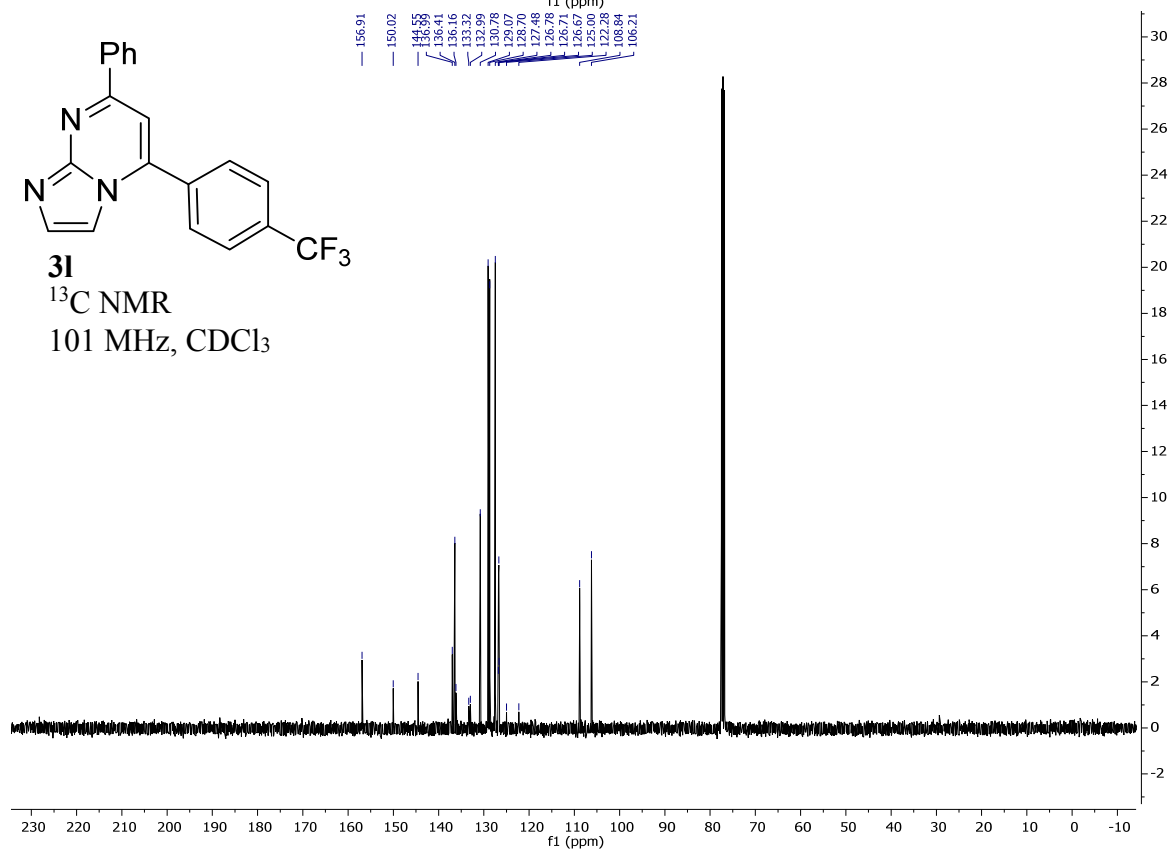

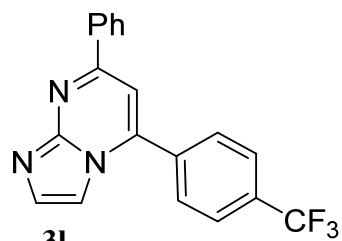

**31**  
<sup>19</sup>F NMR  
376 MHz, CDCl<sub>3</sub>

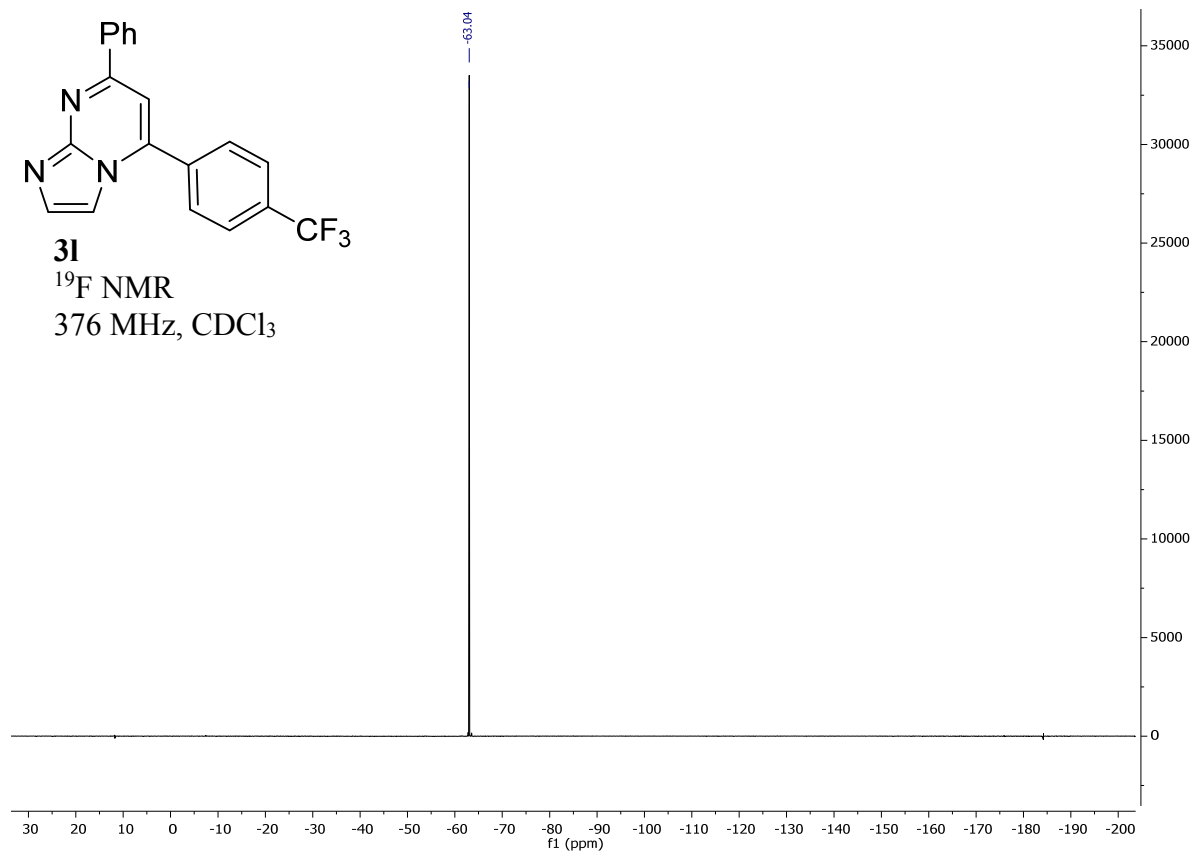

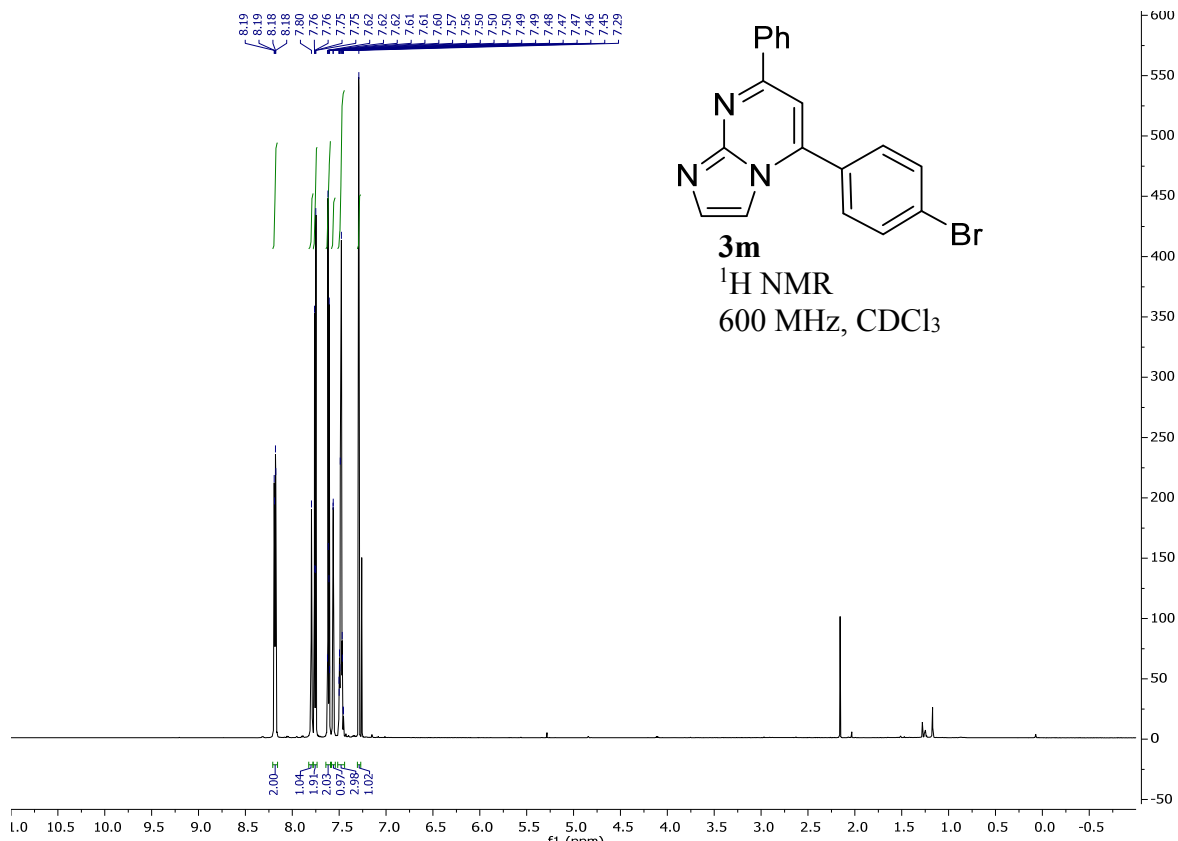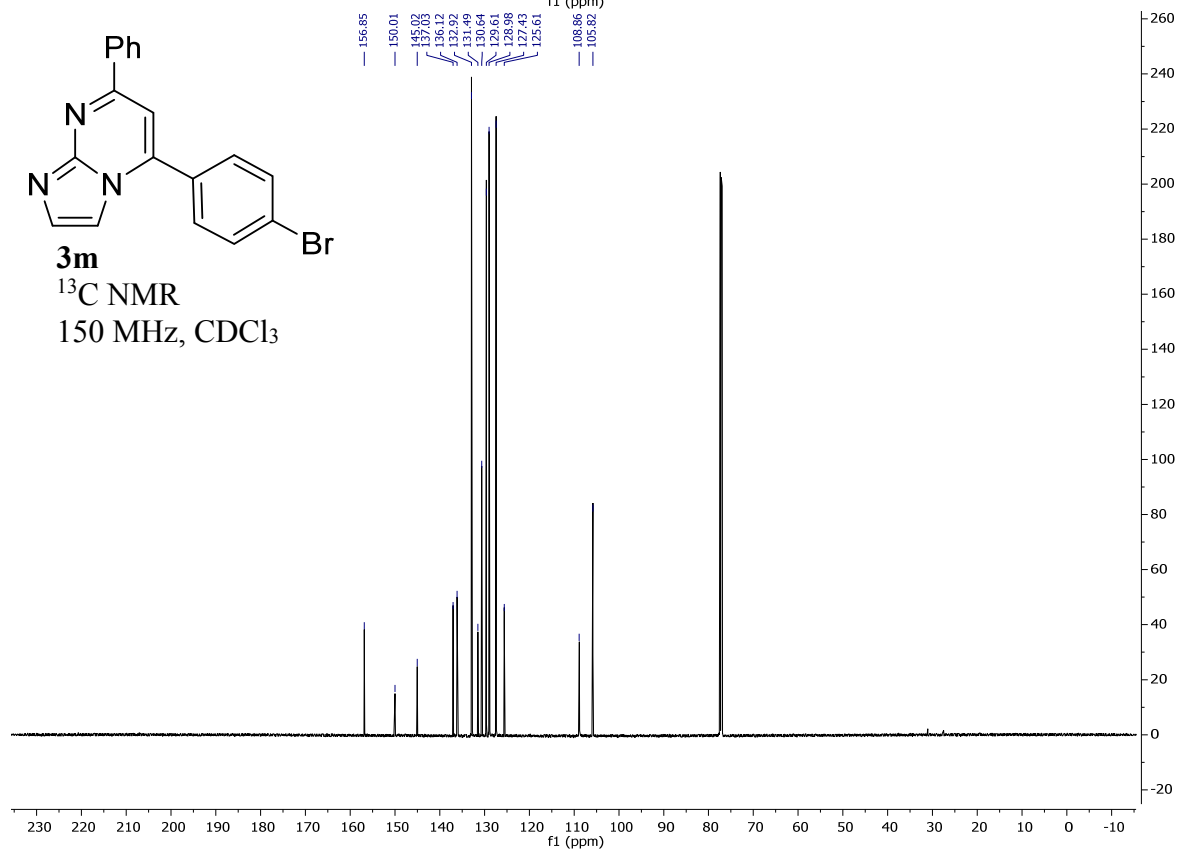

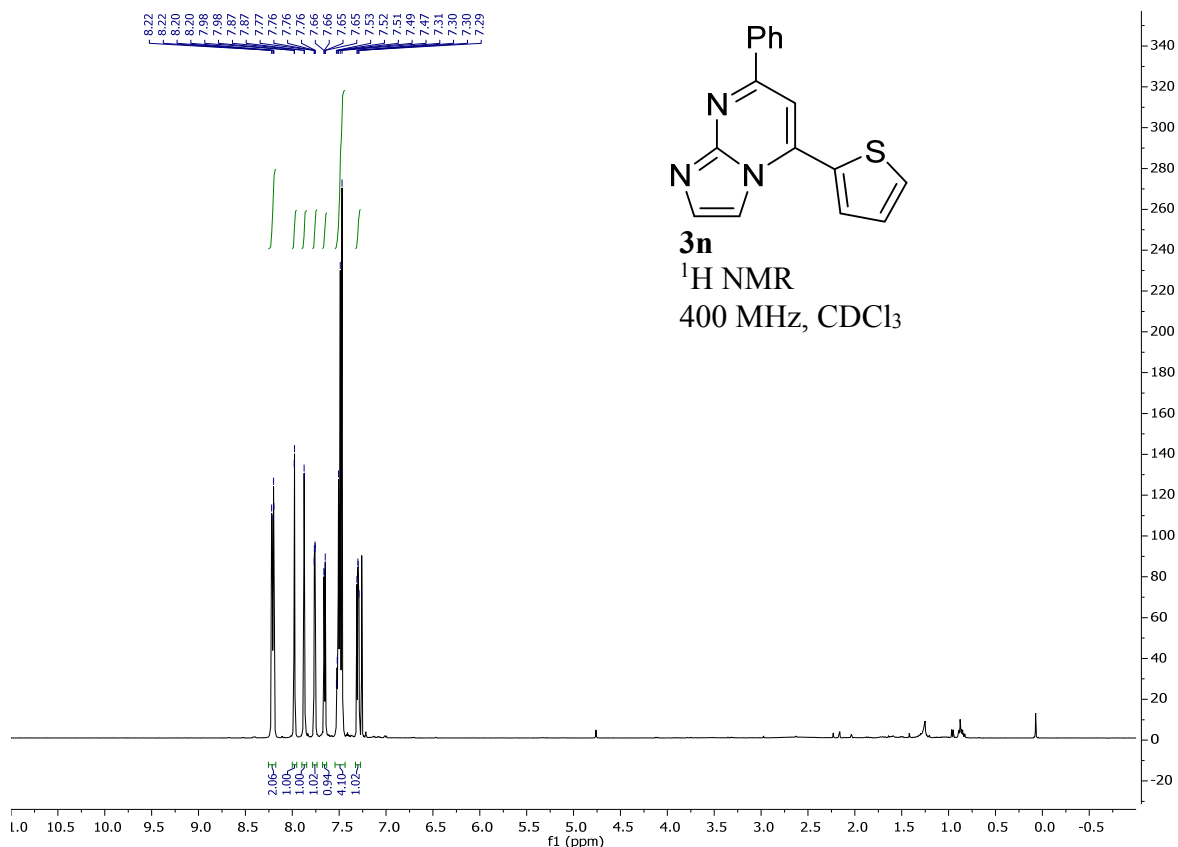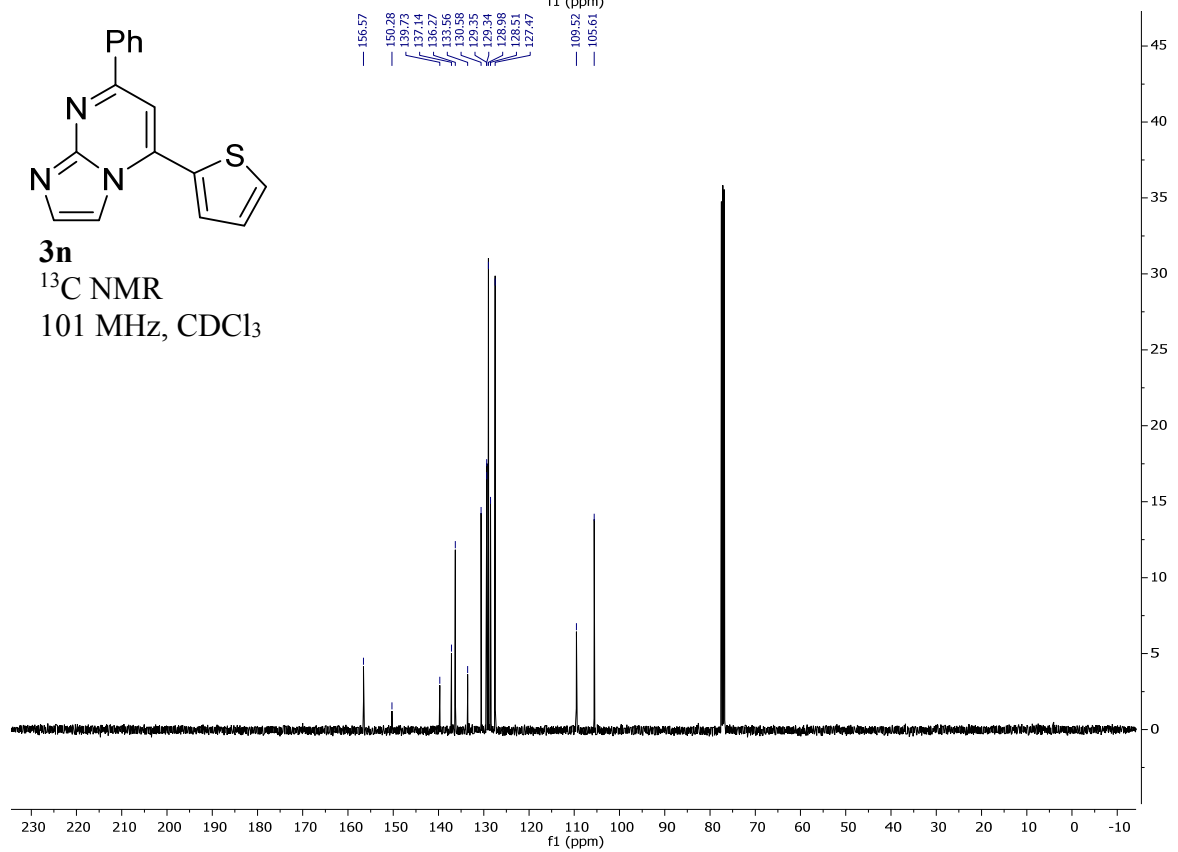

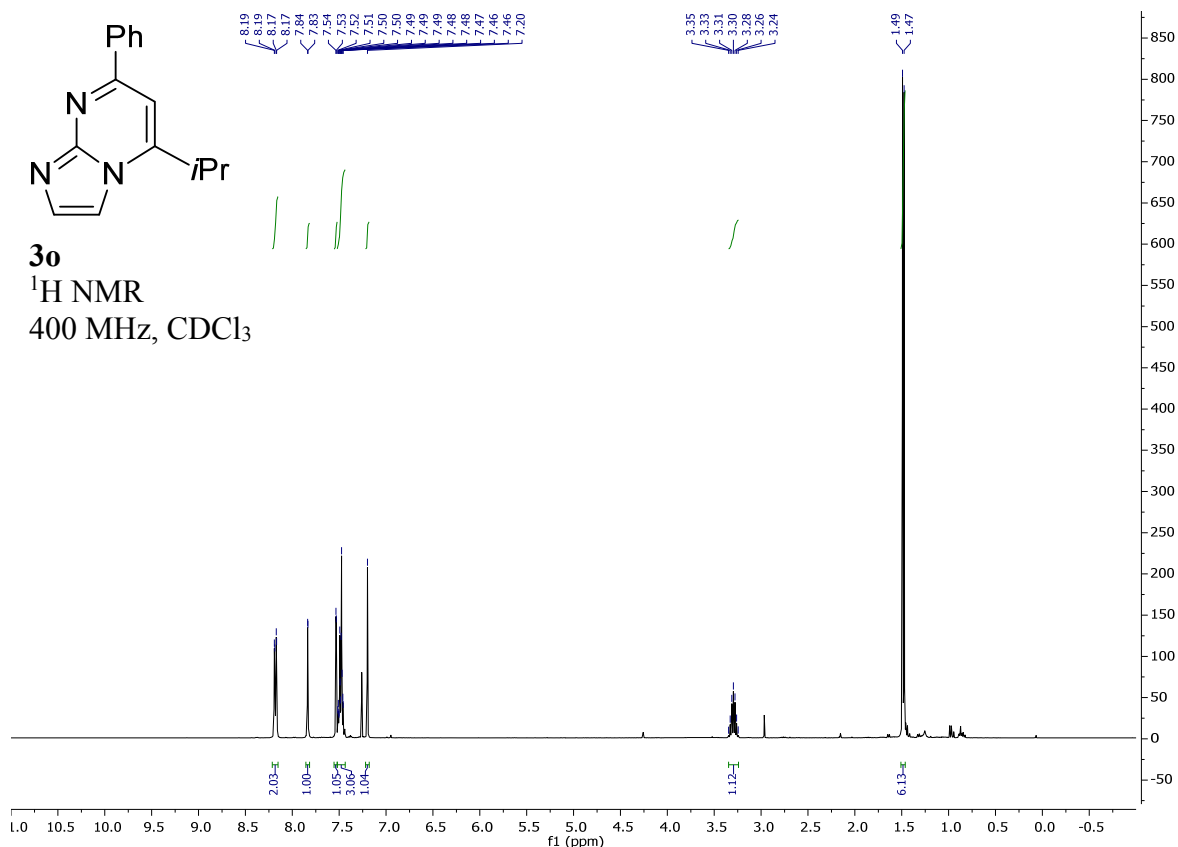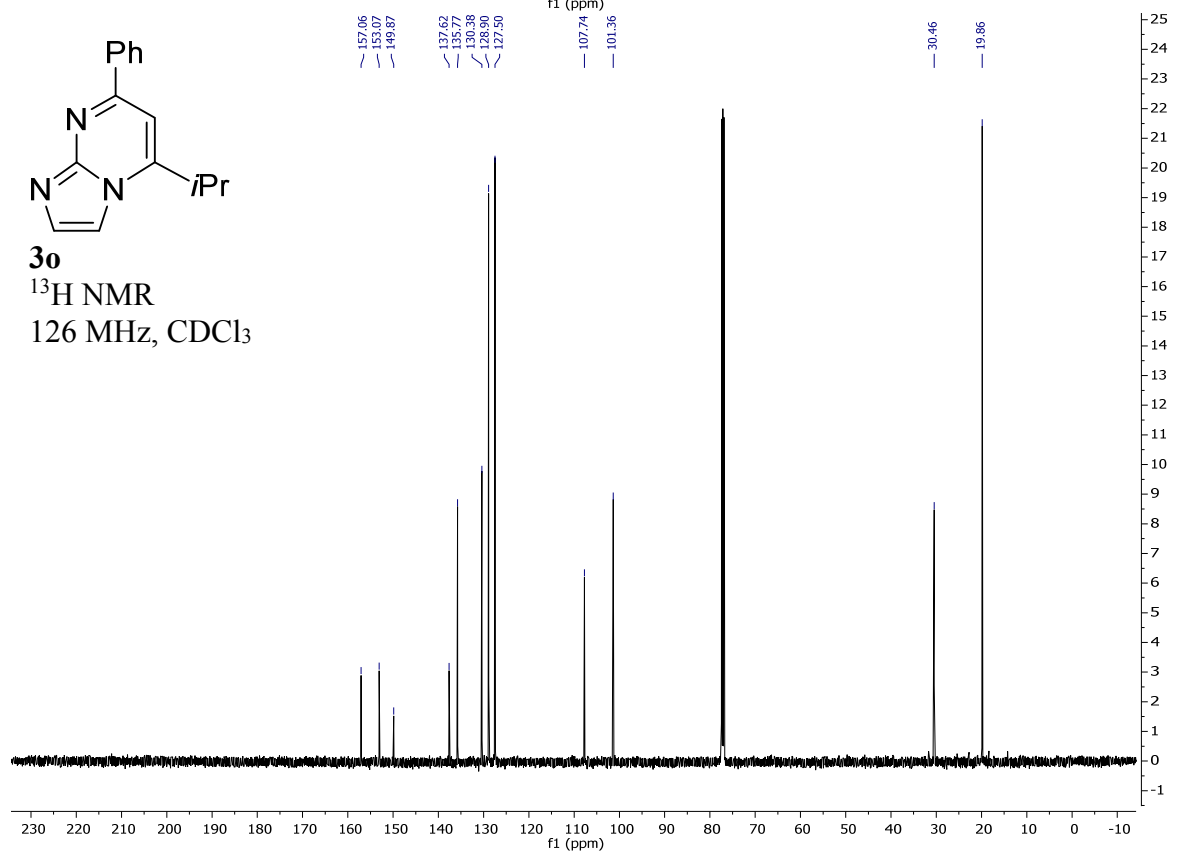

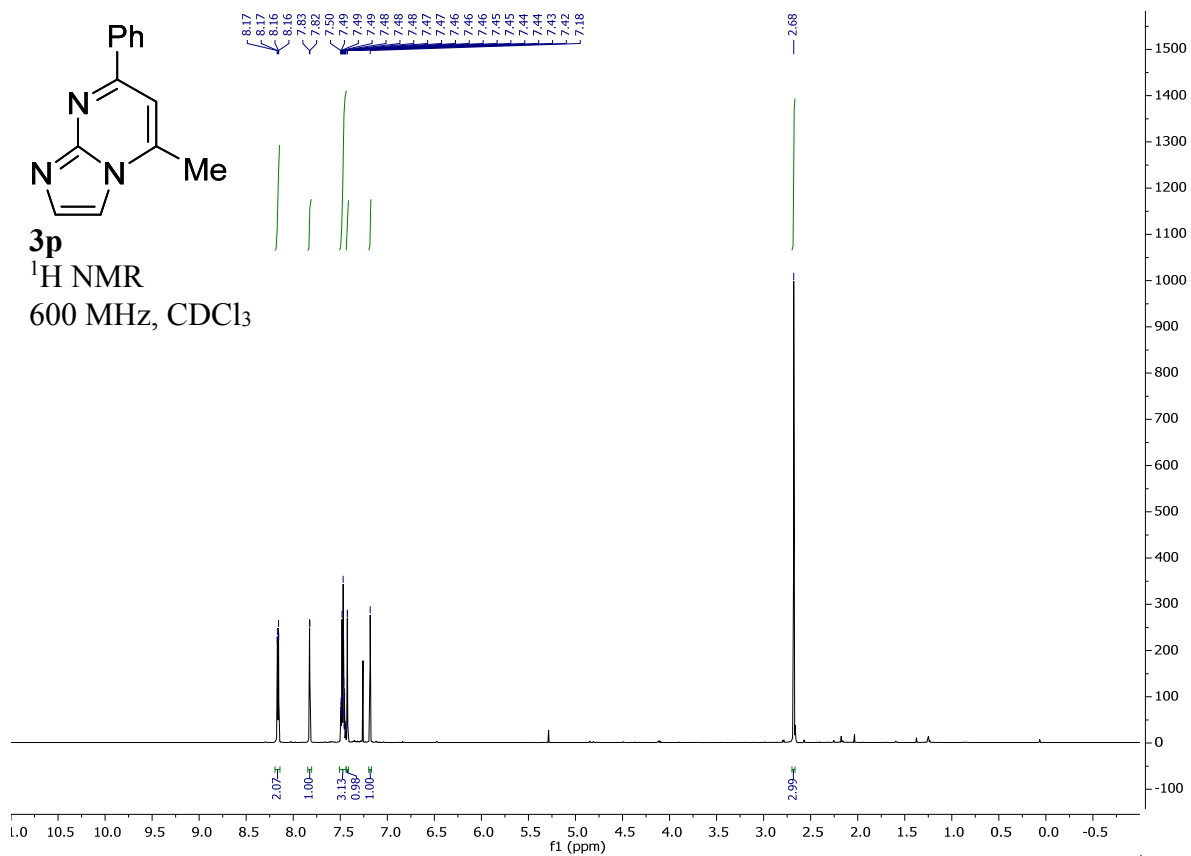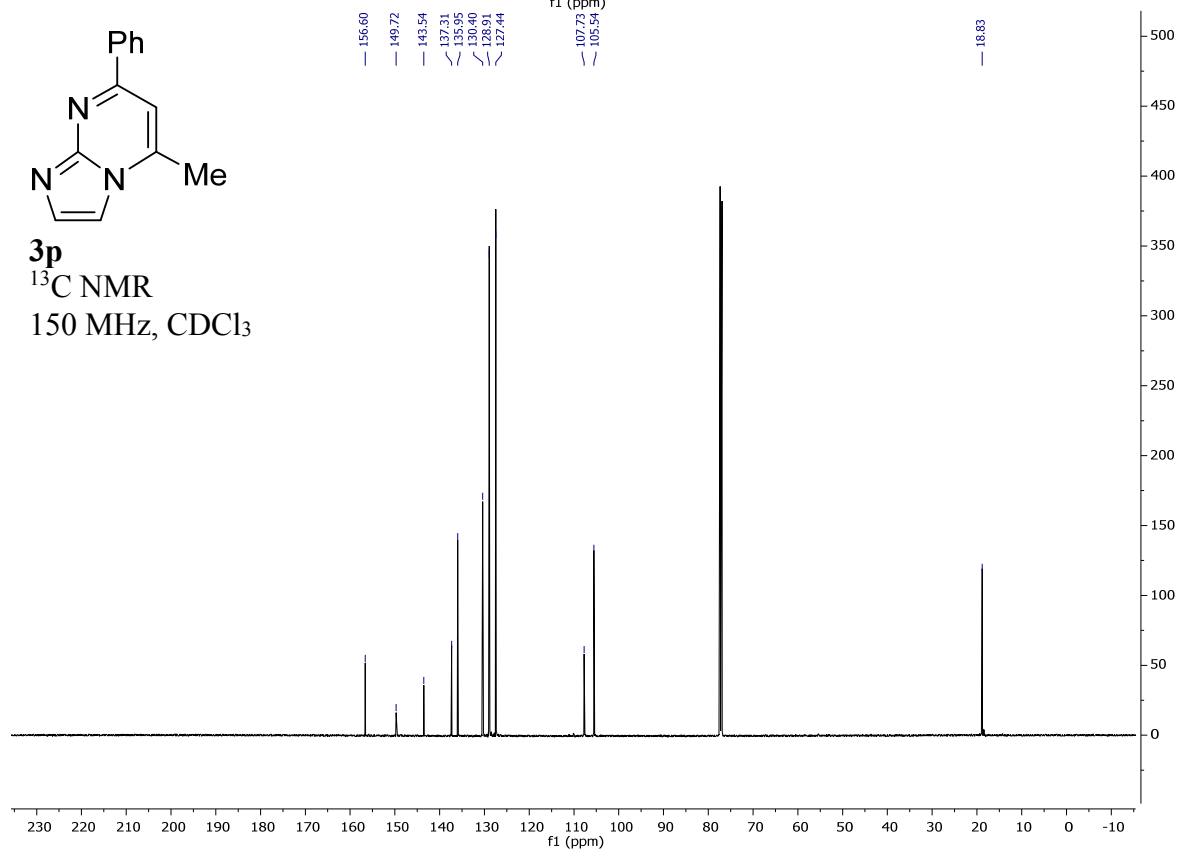



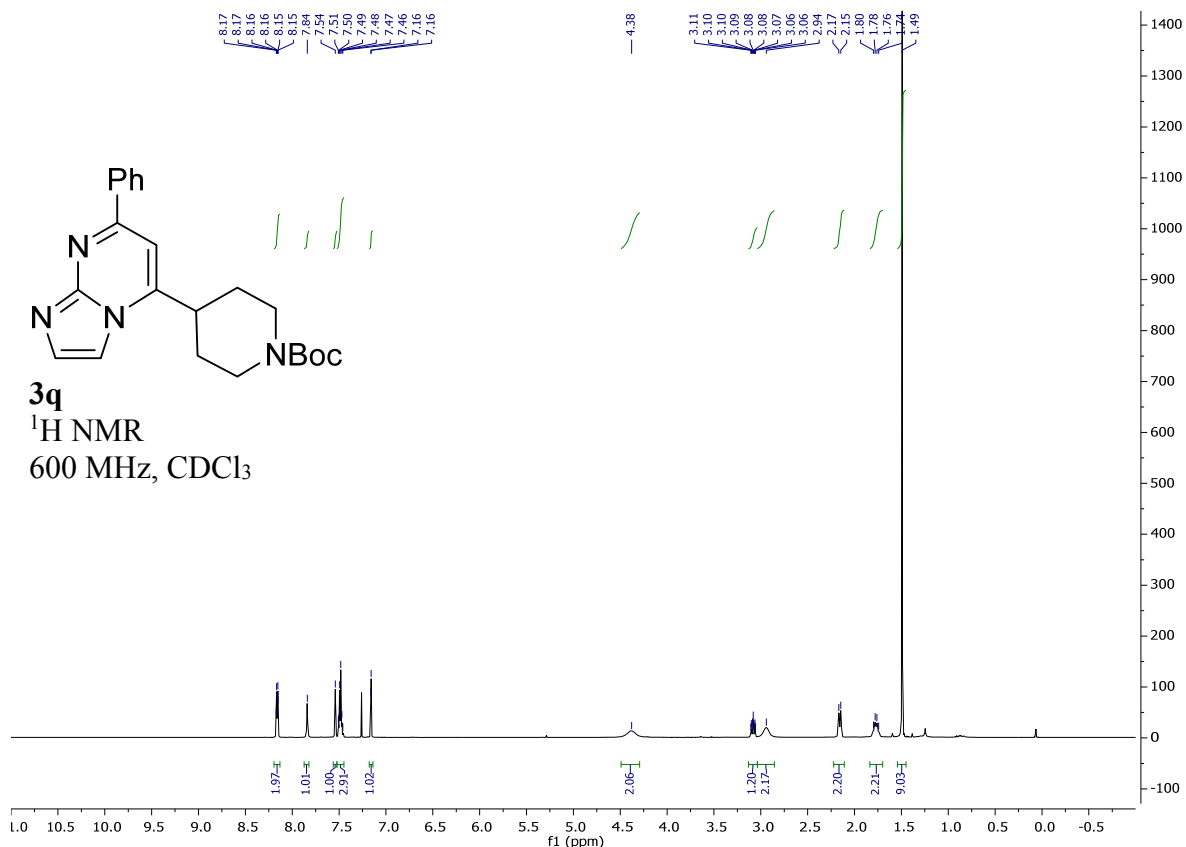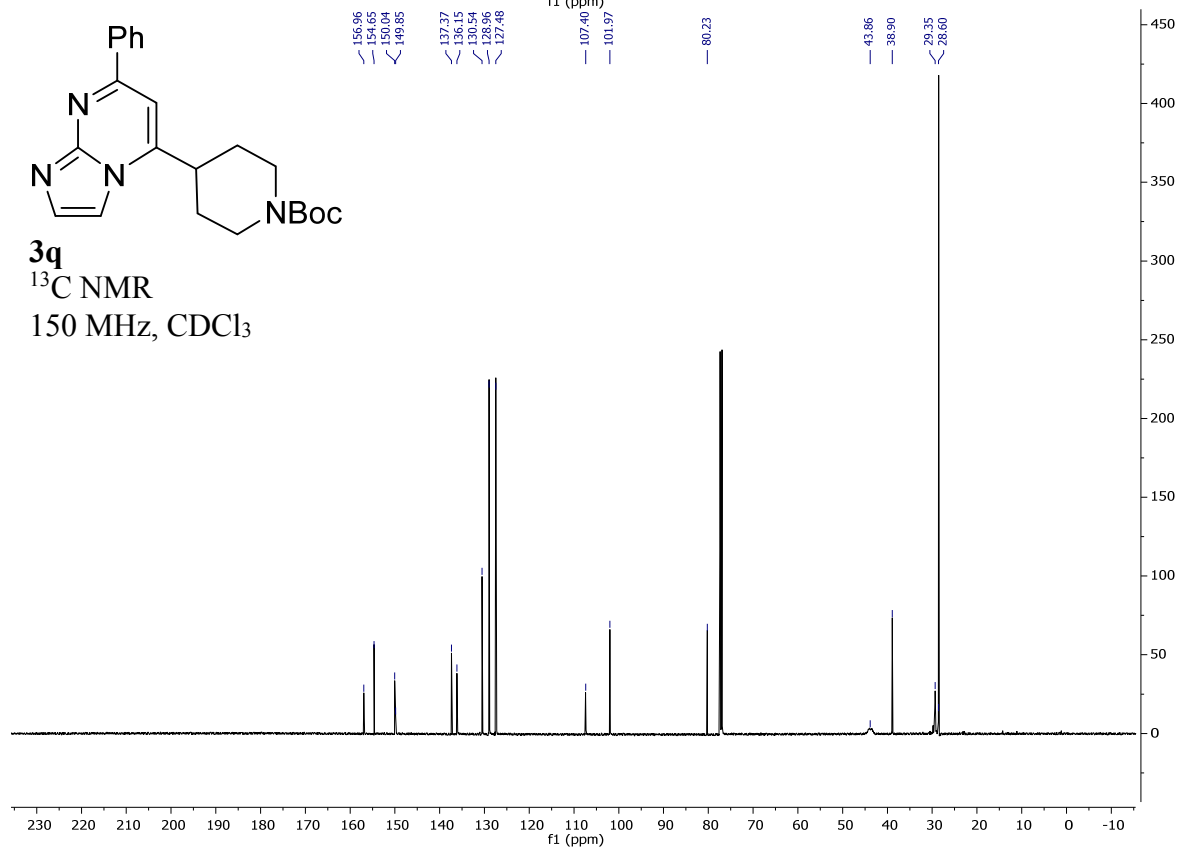

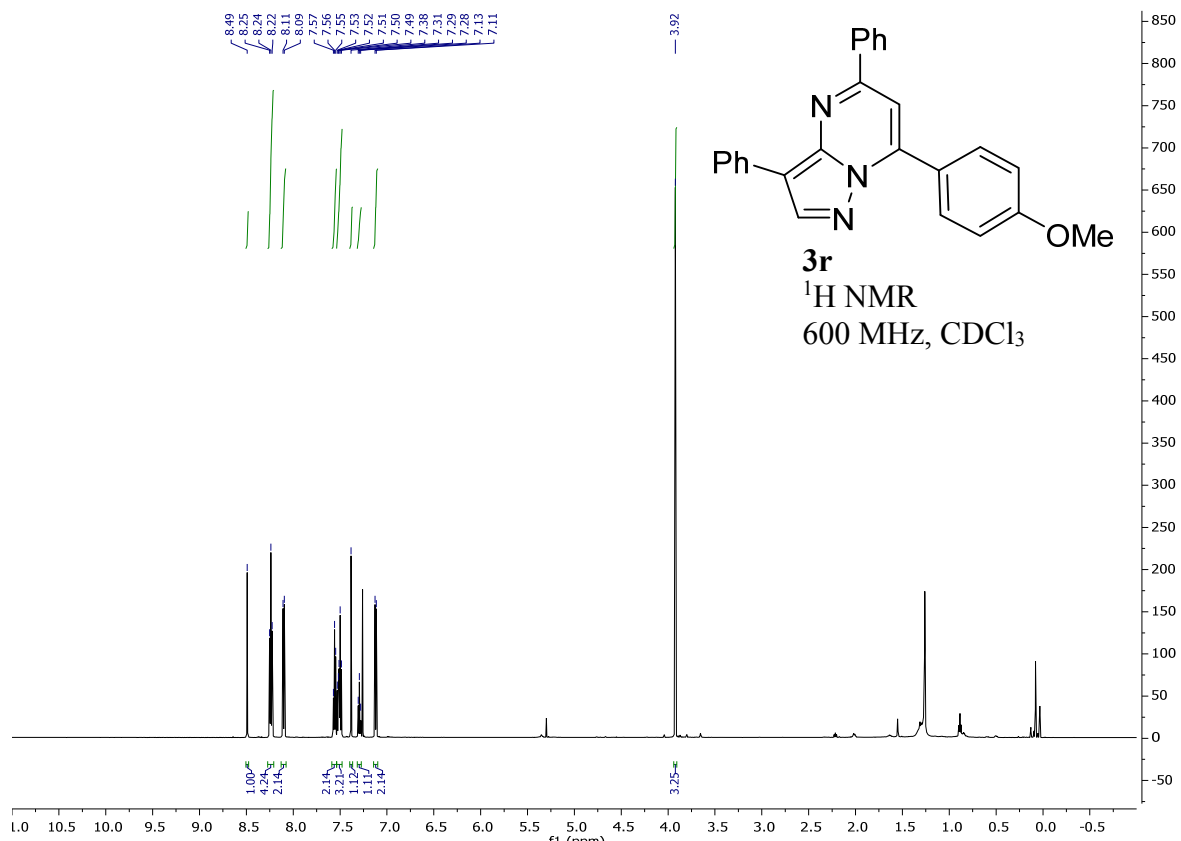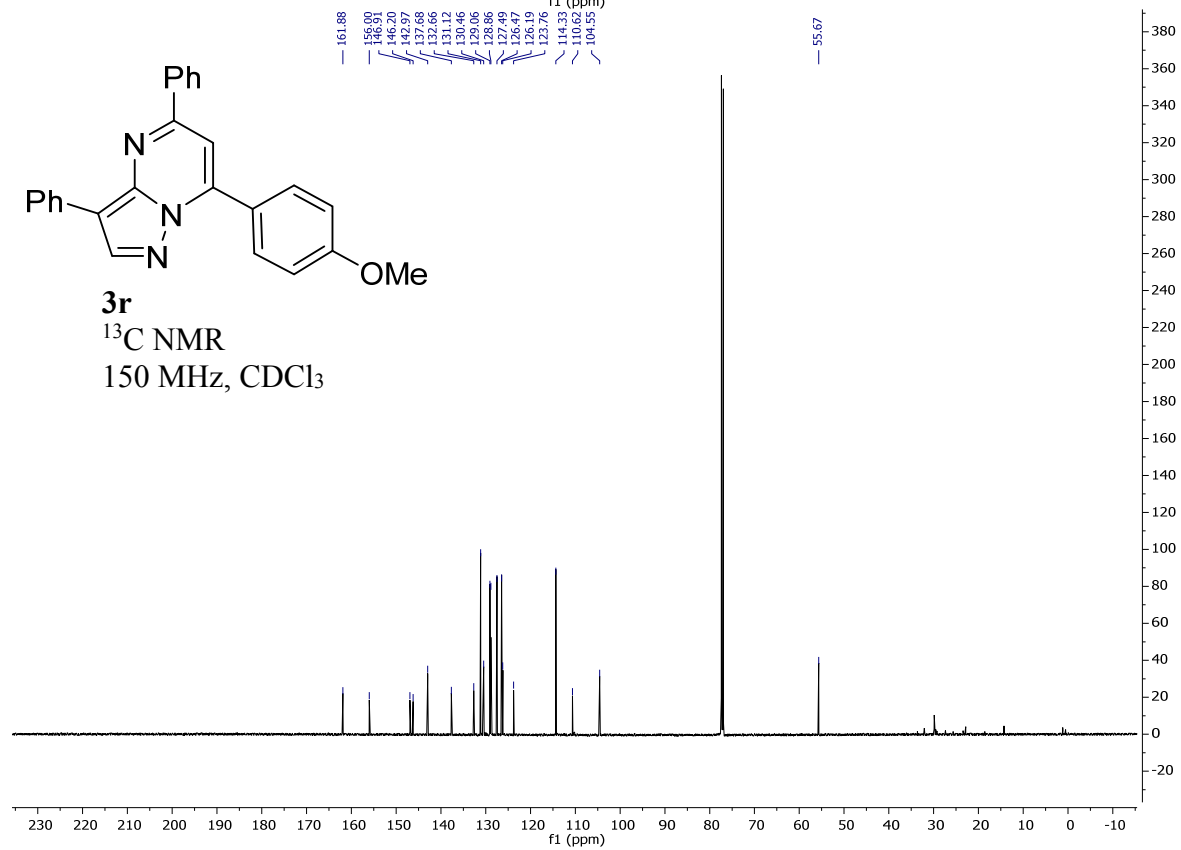

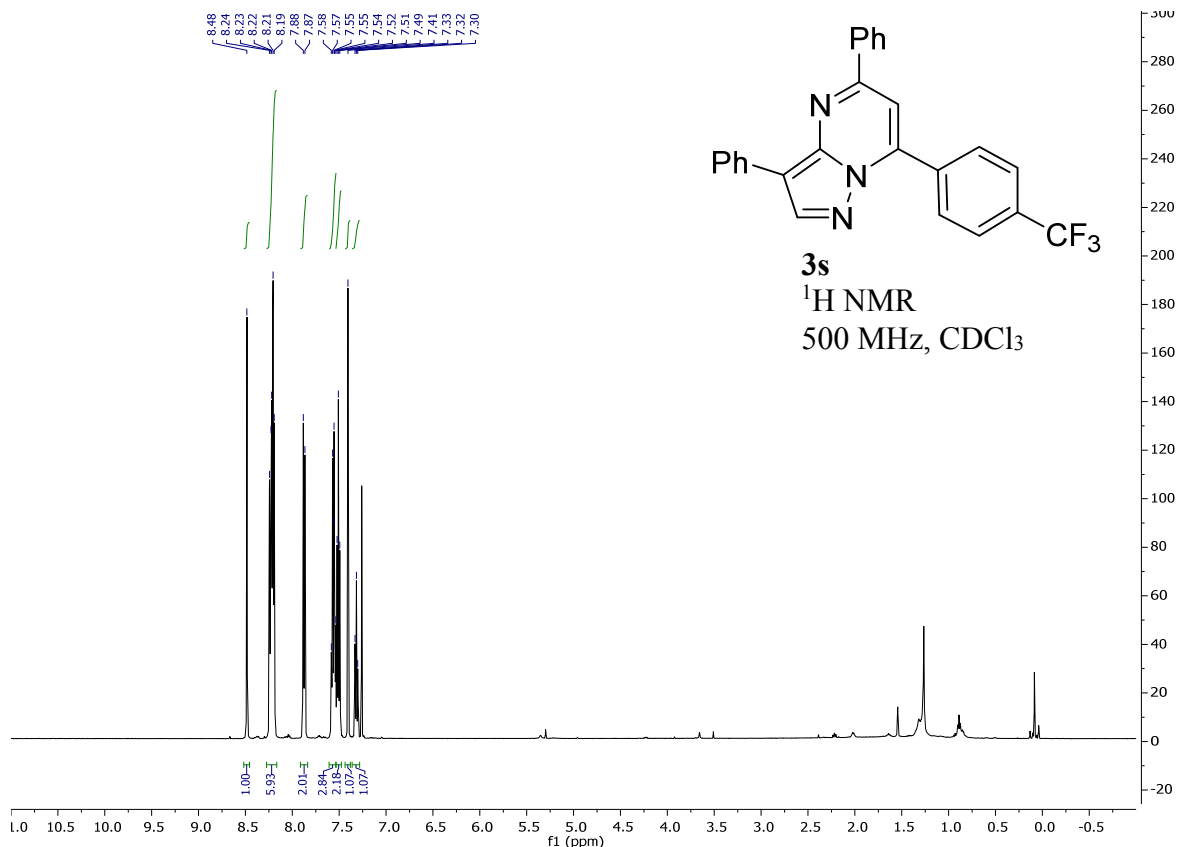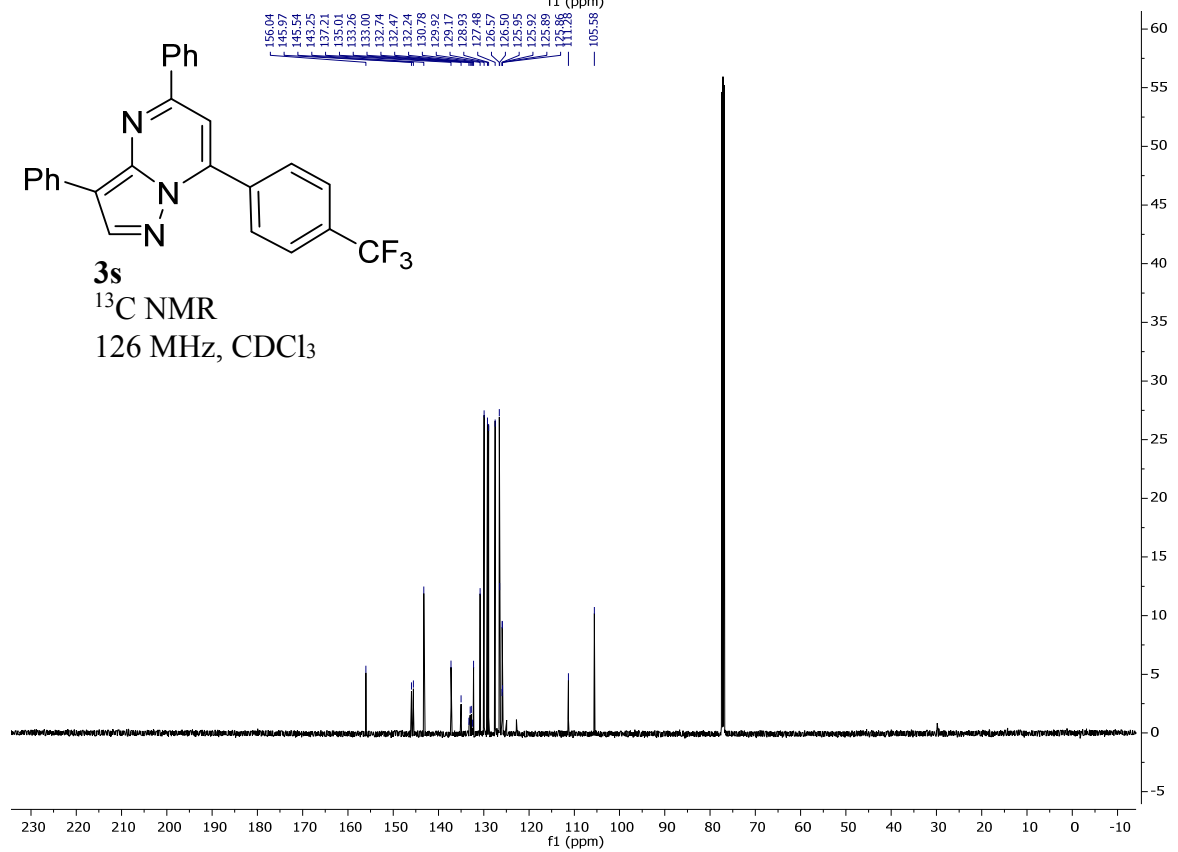

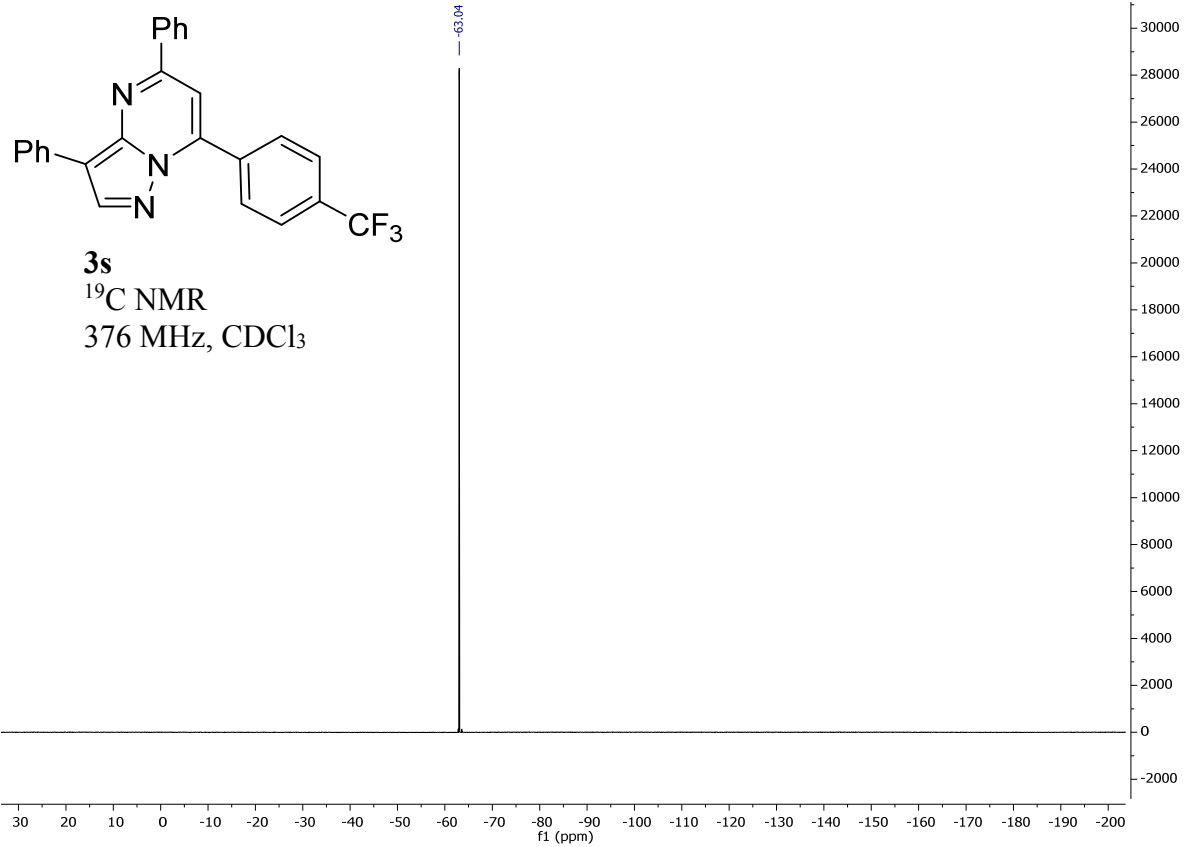

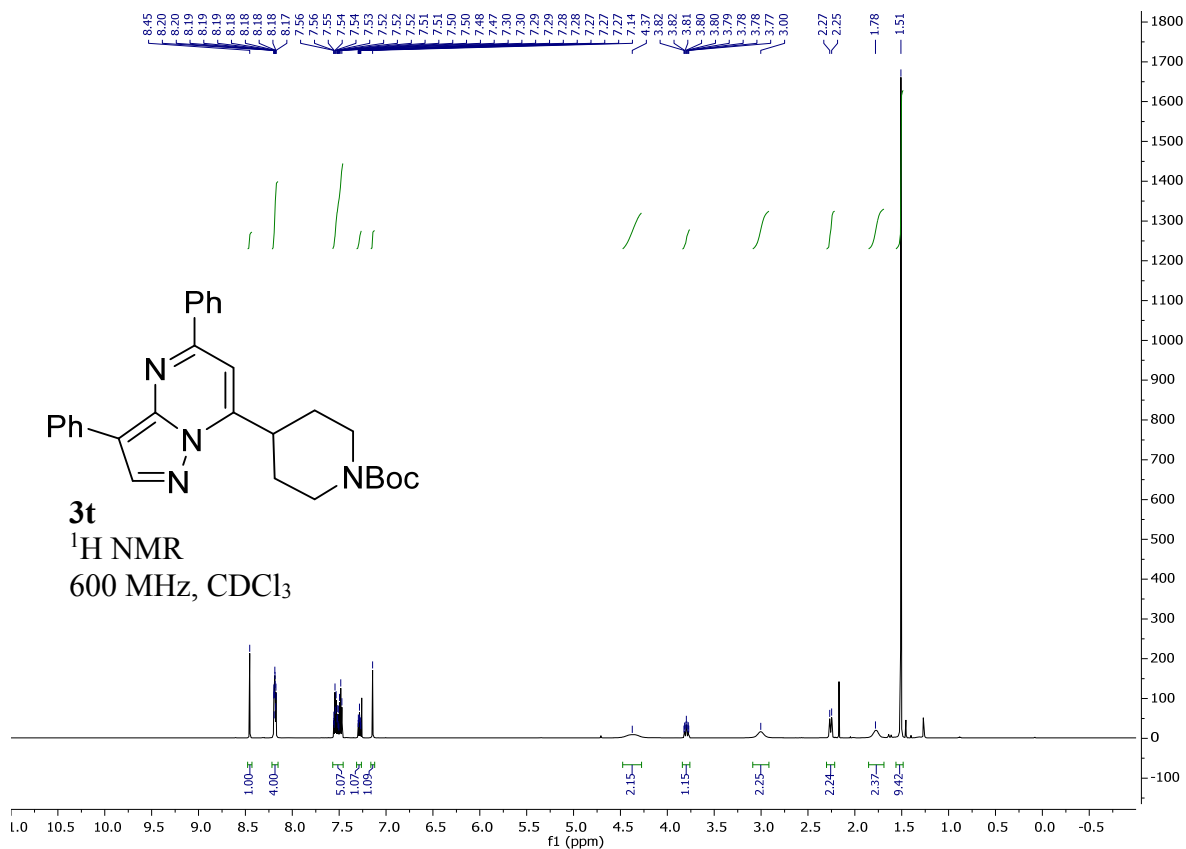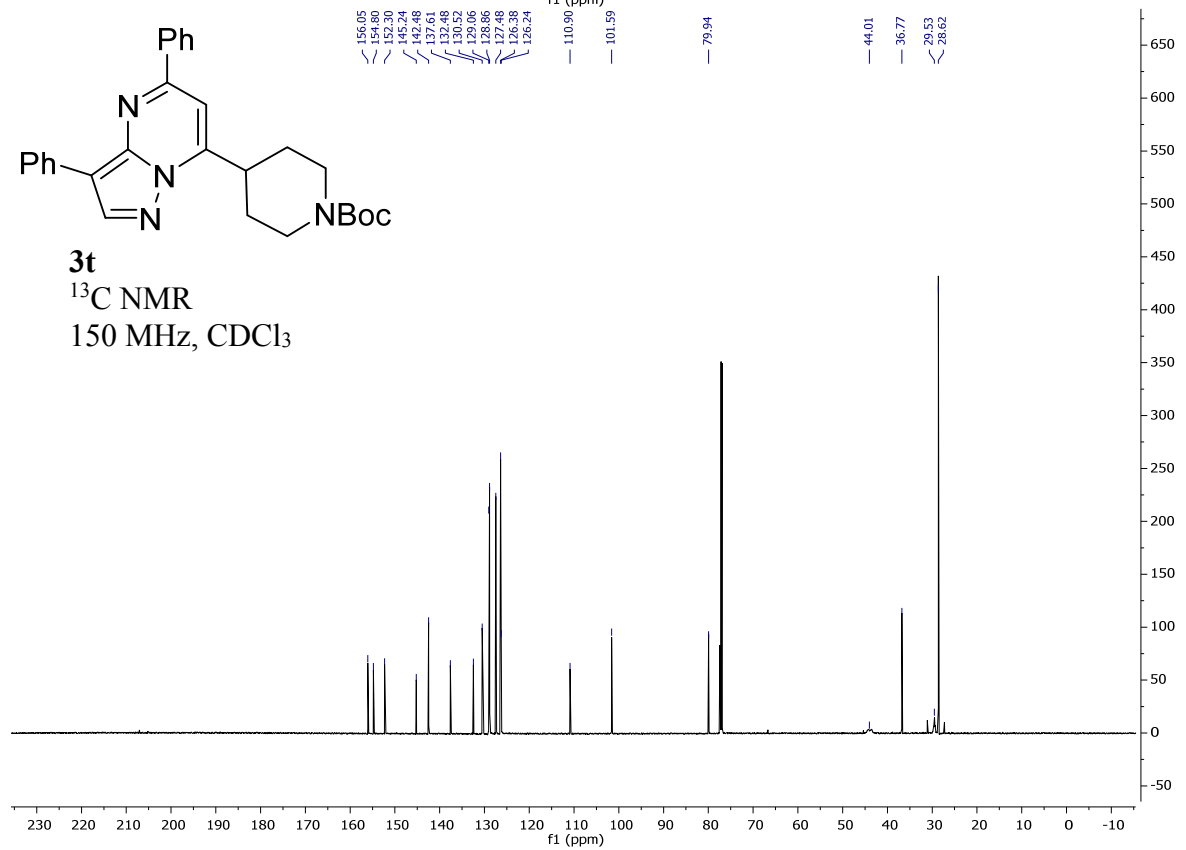

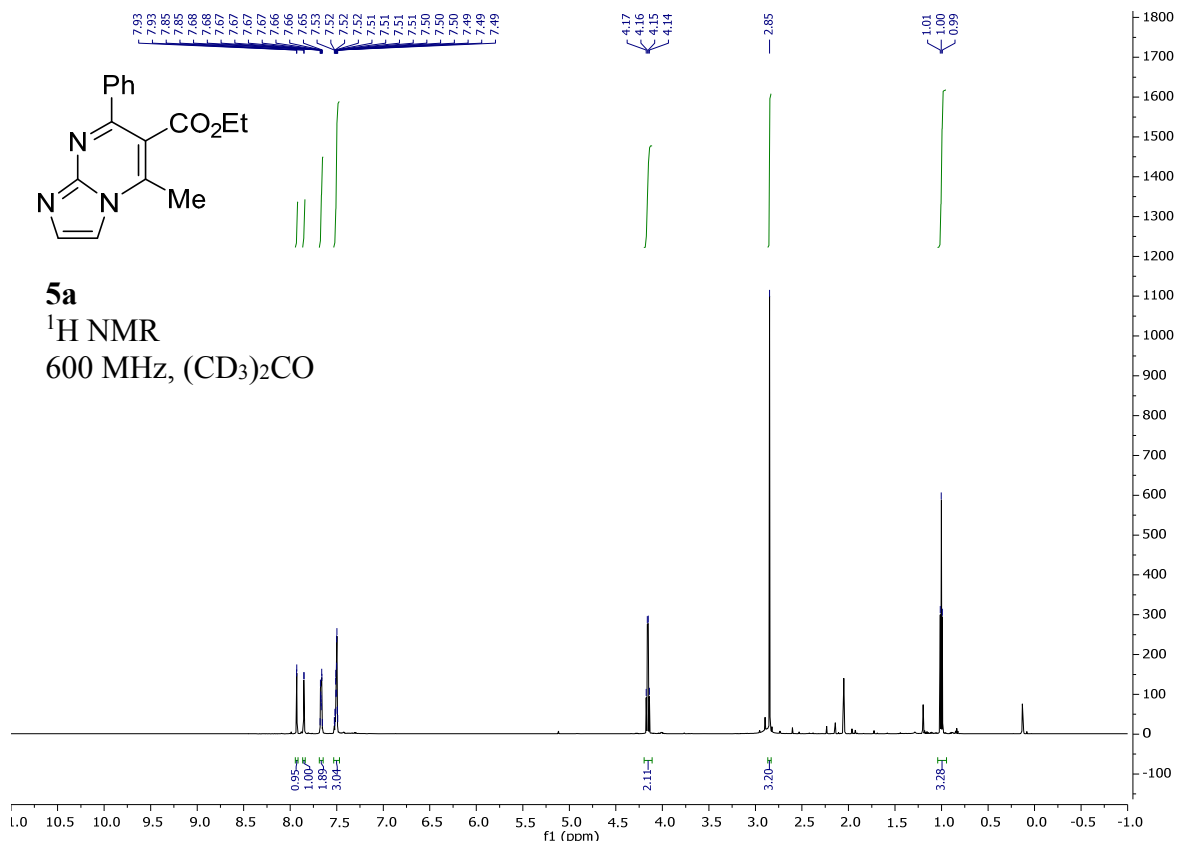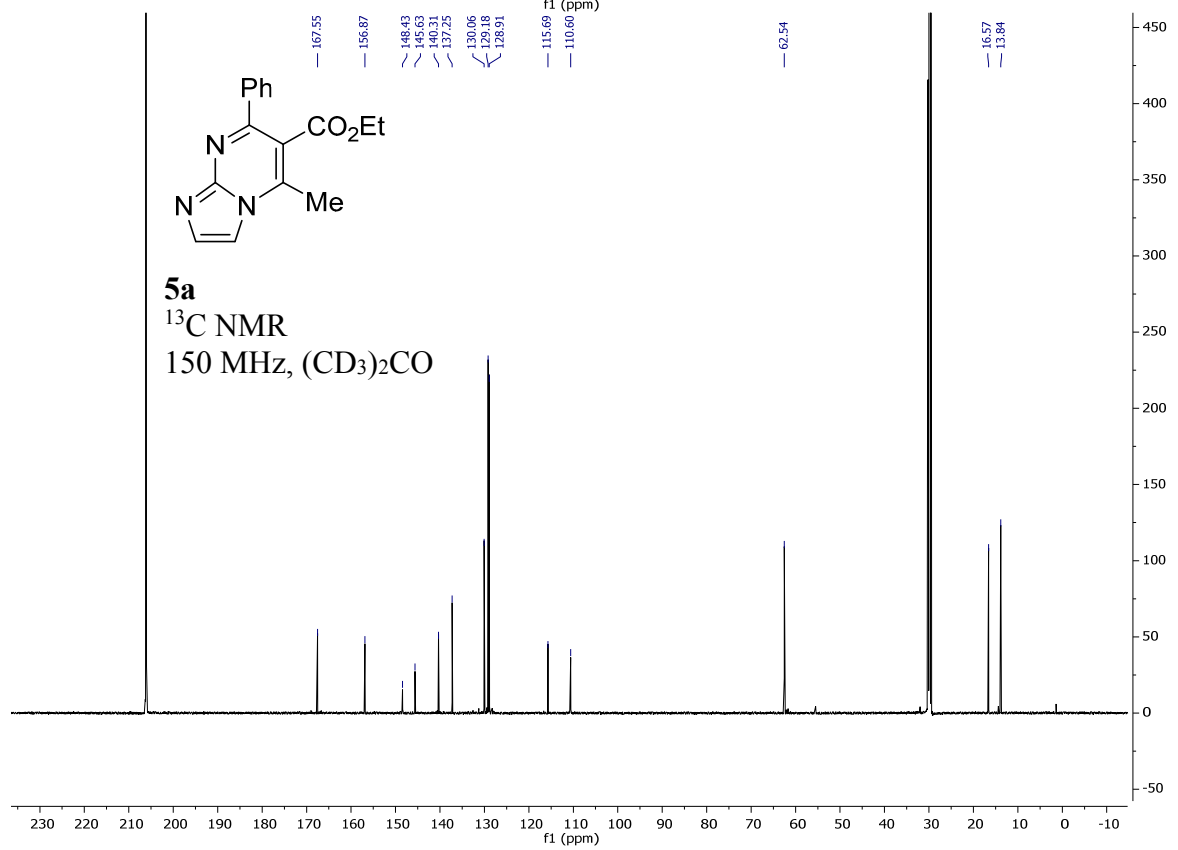

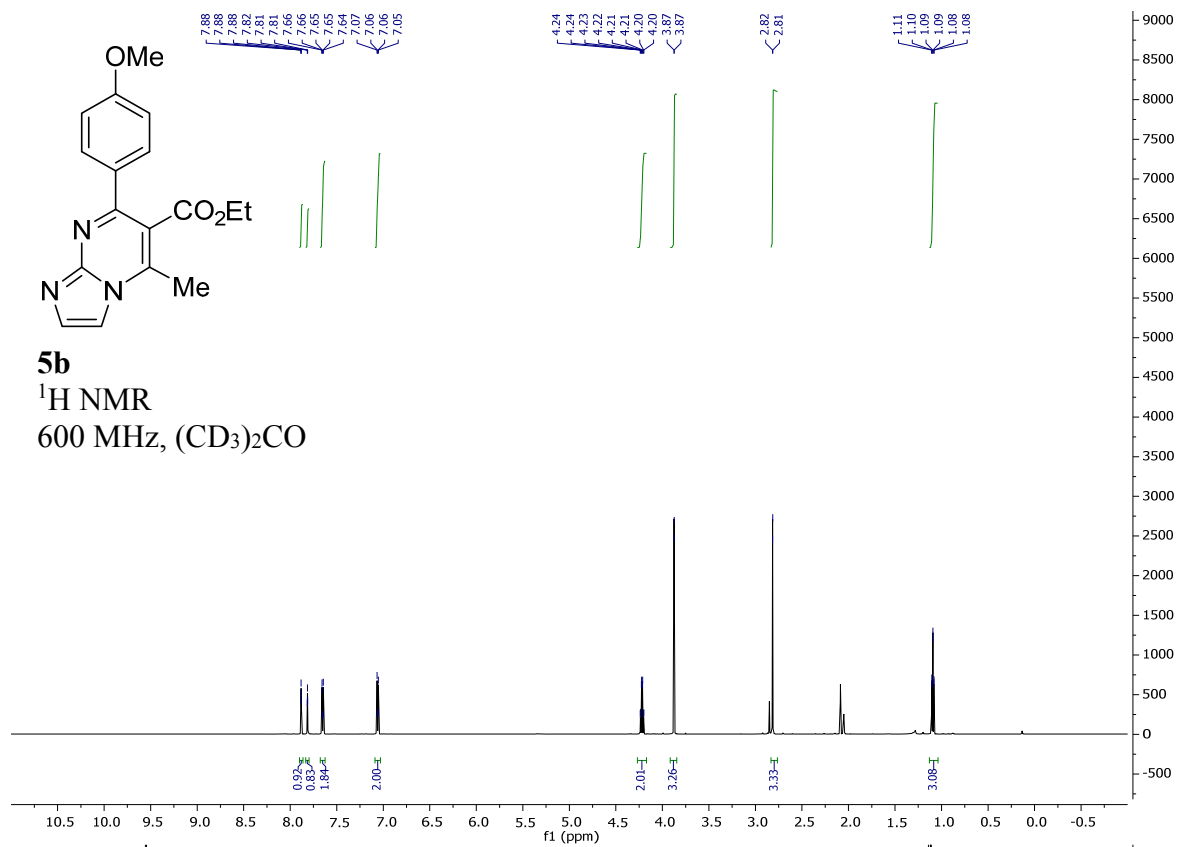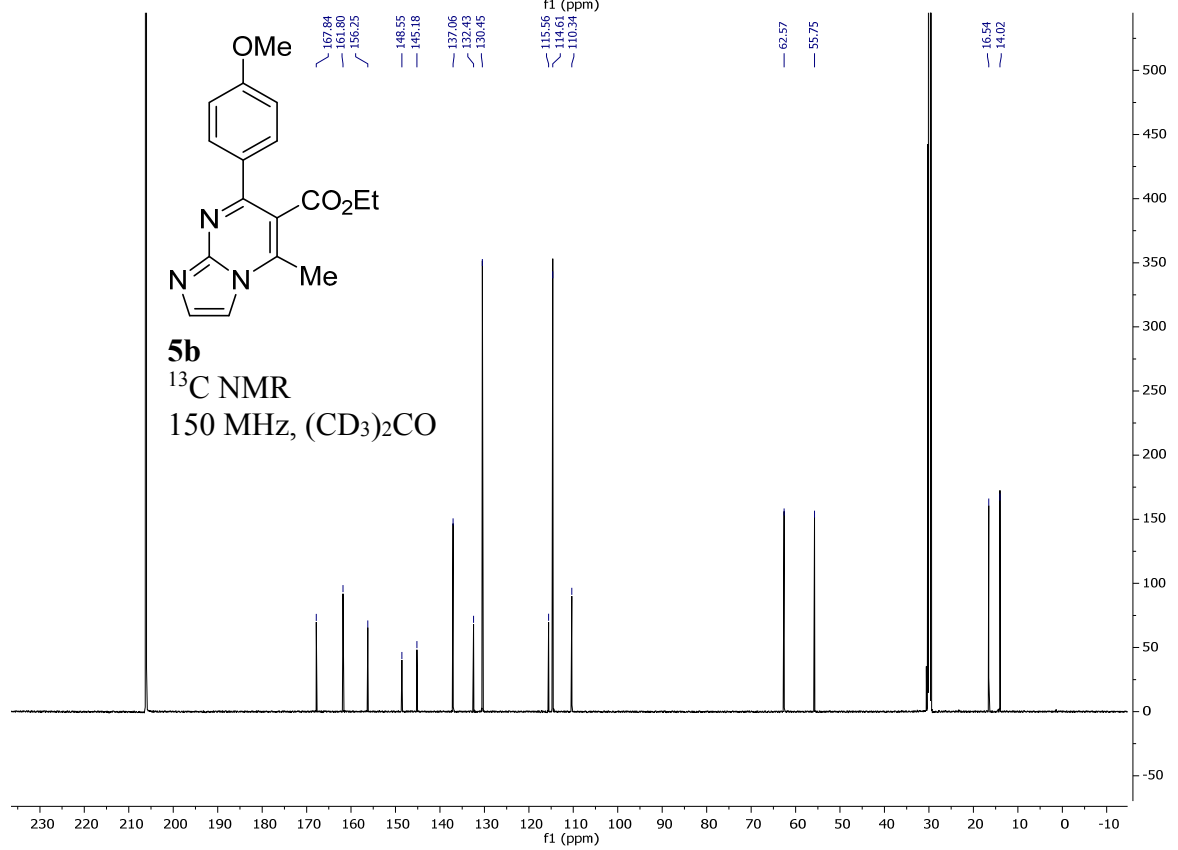

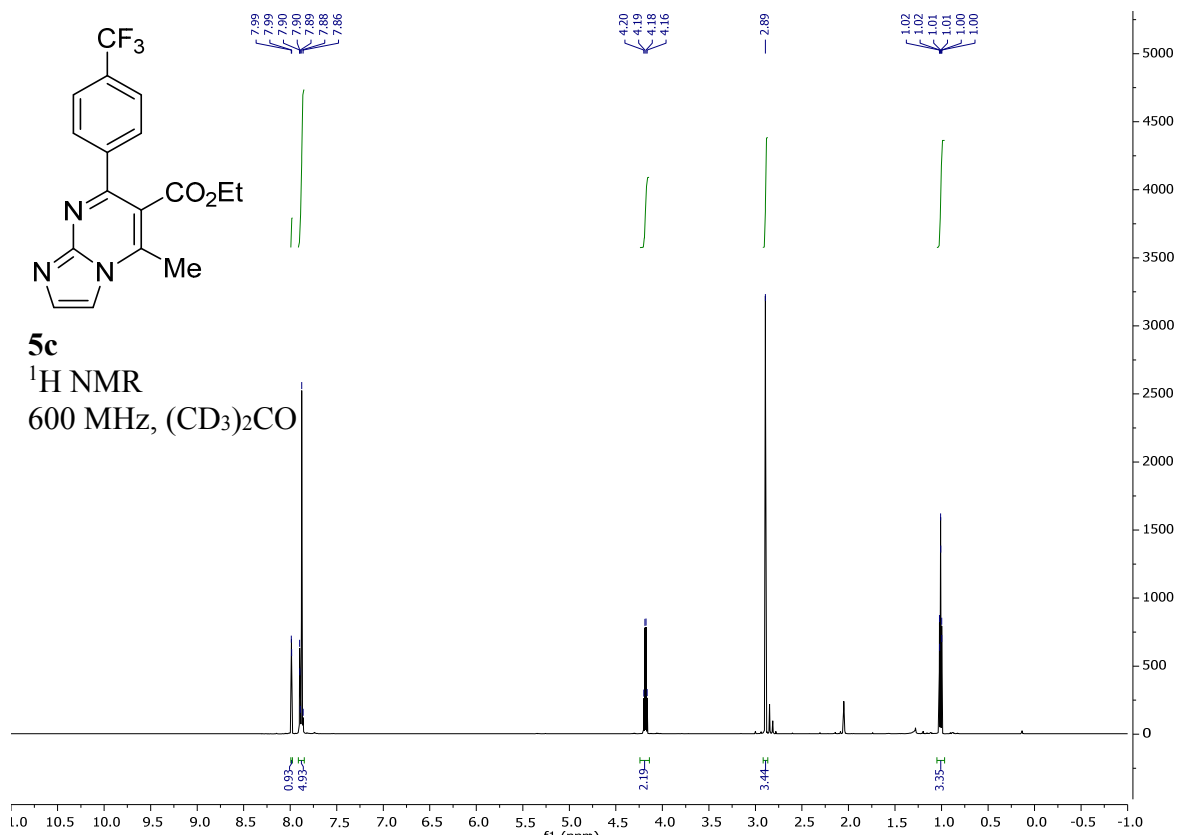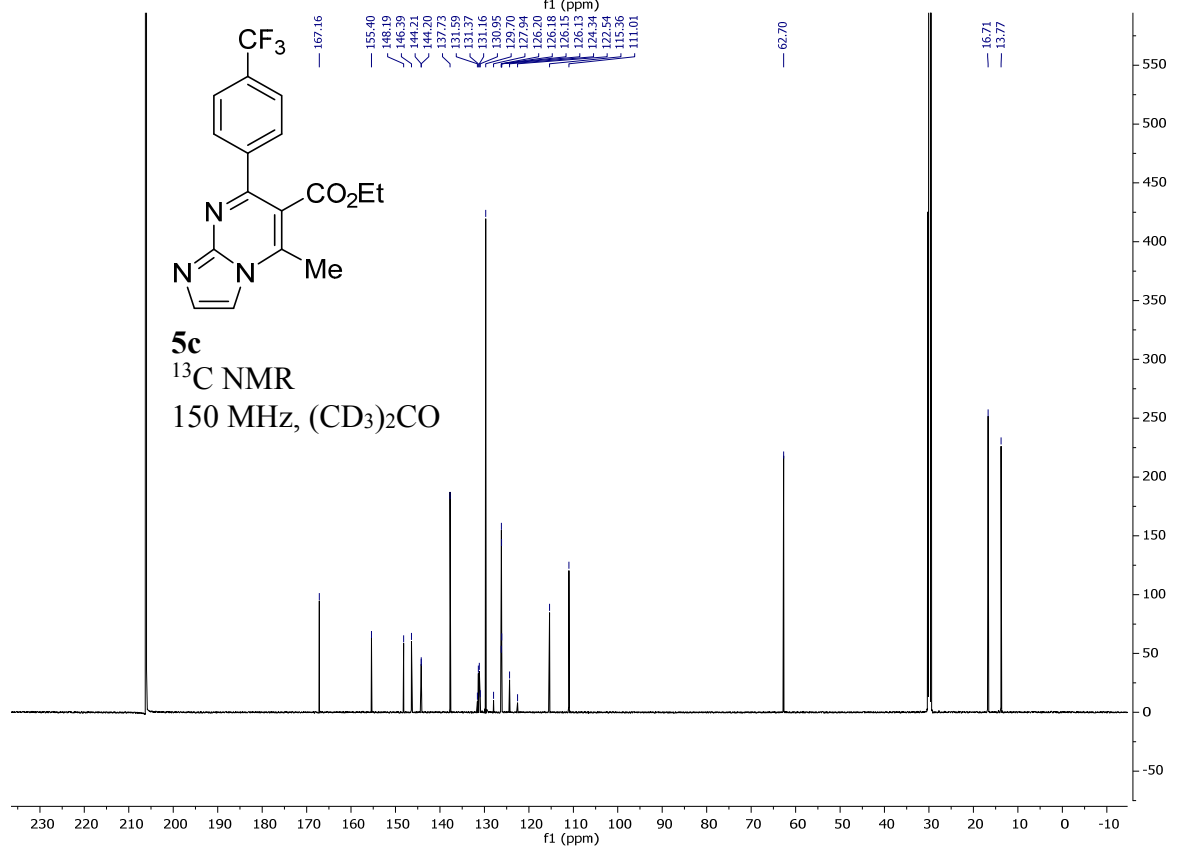



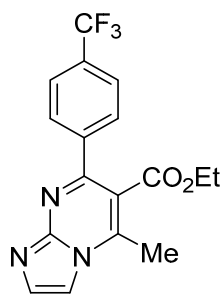

**5c**  
<sup>19</sup>F NMR  
376 MHz, (CD<sub>3</sub>)<sub>2</sub>CO

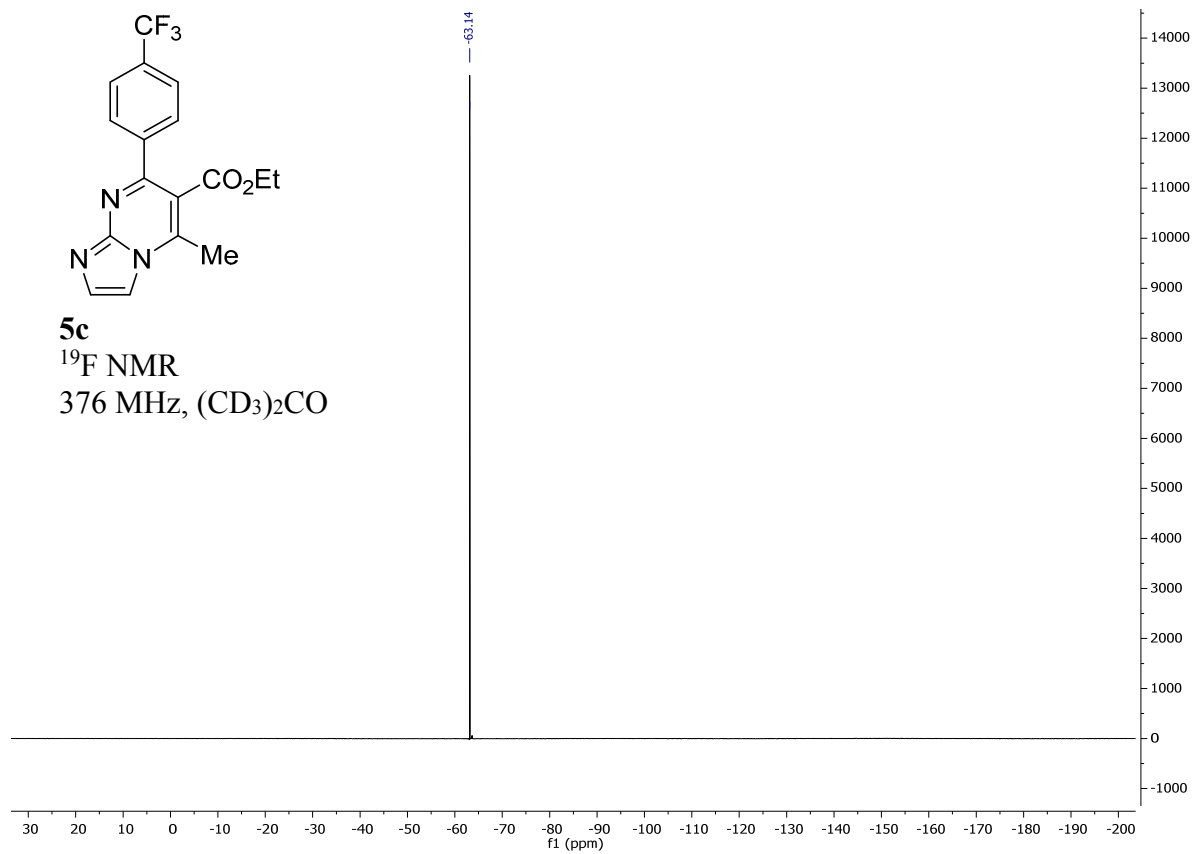

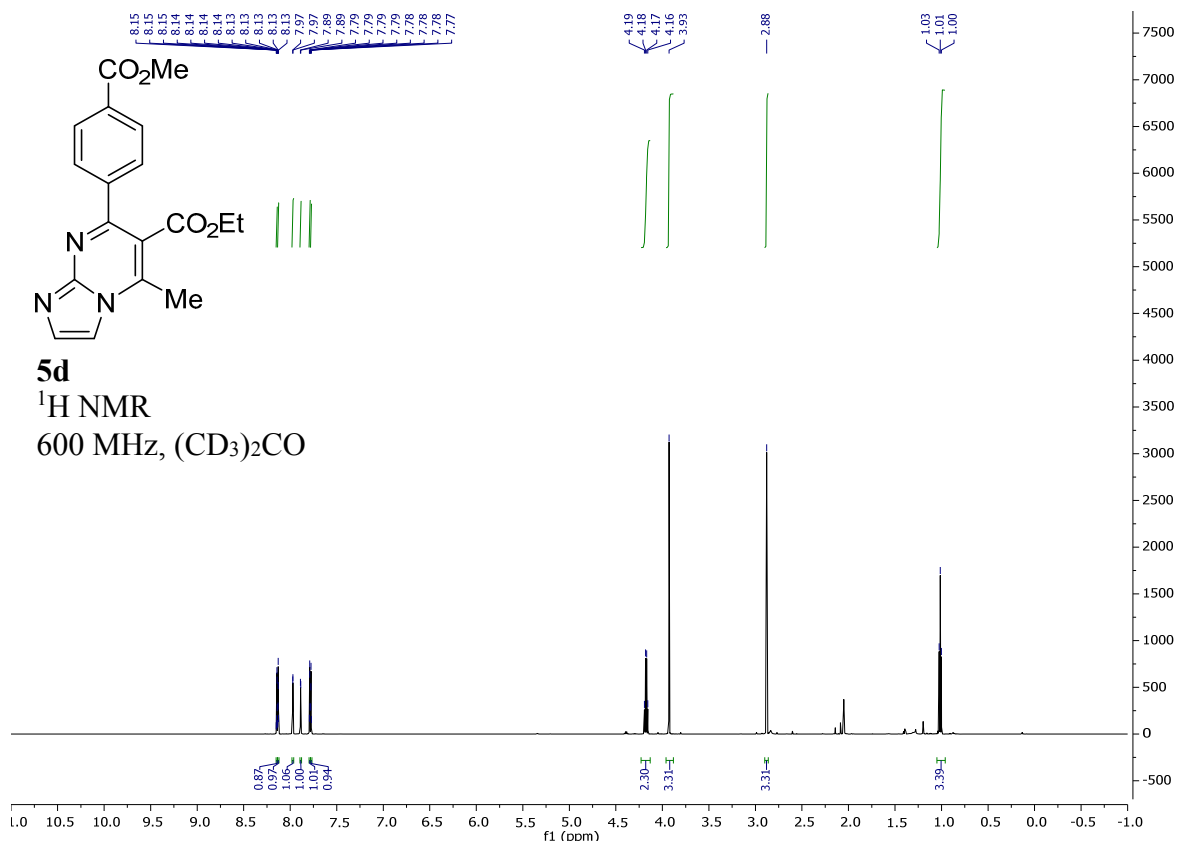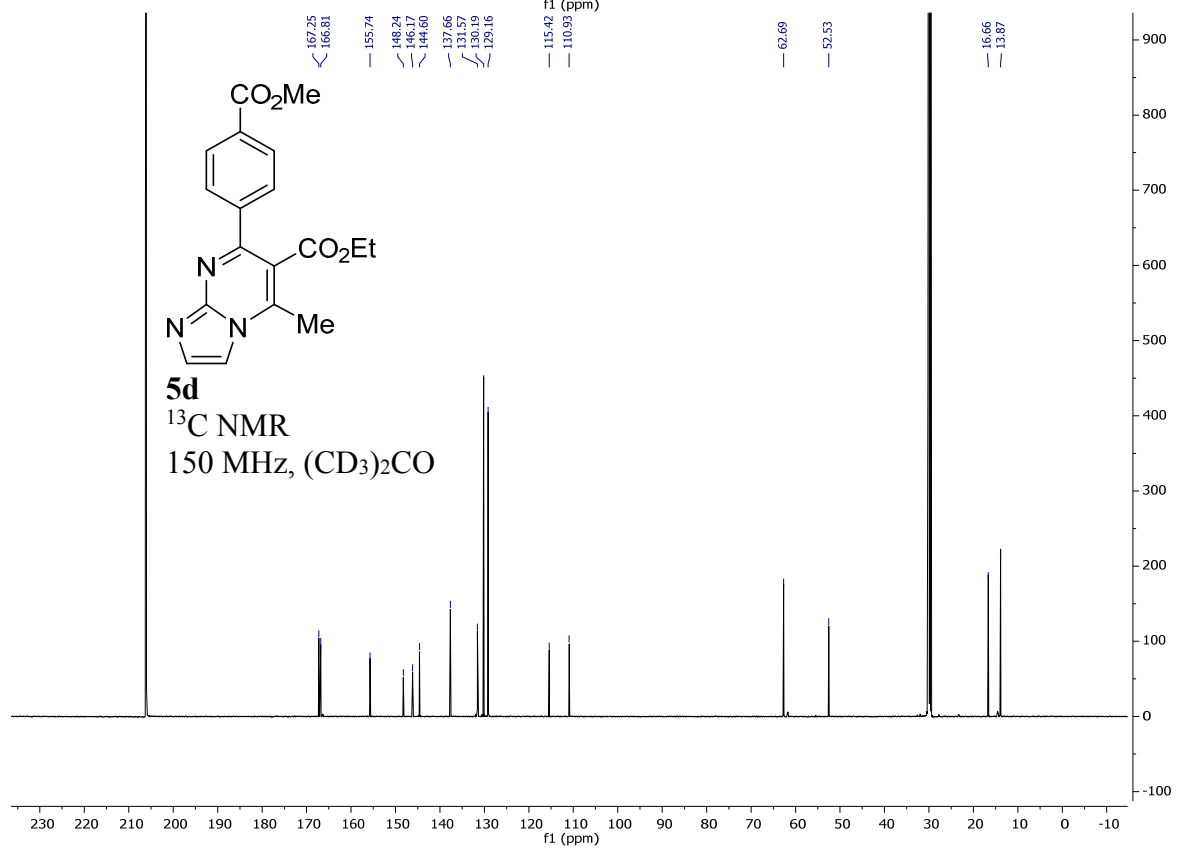



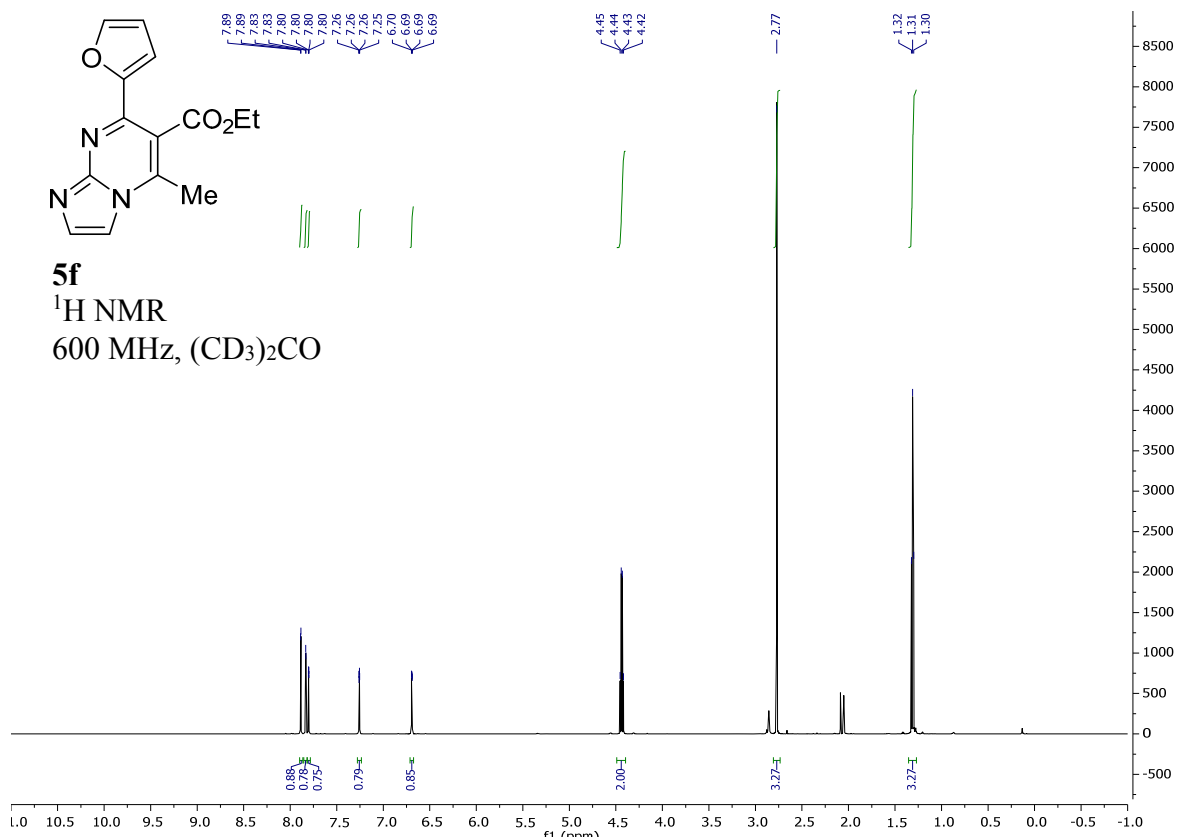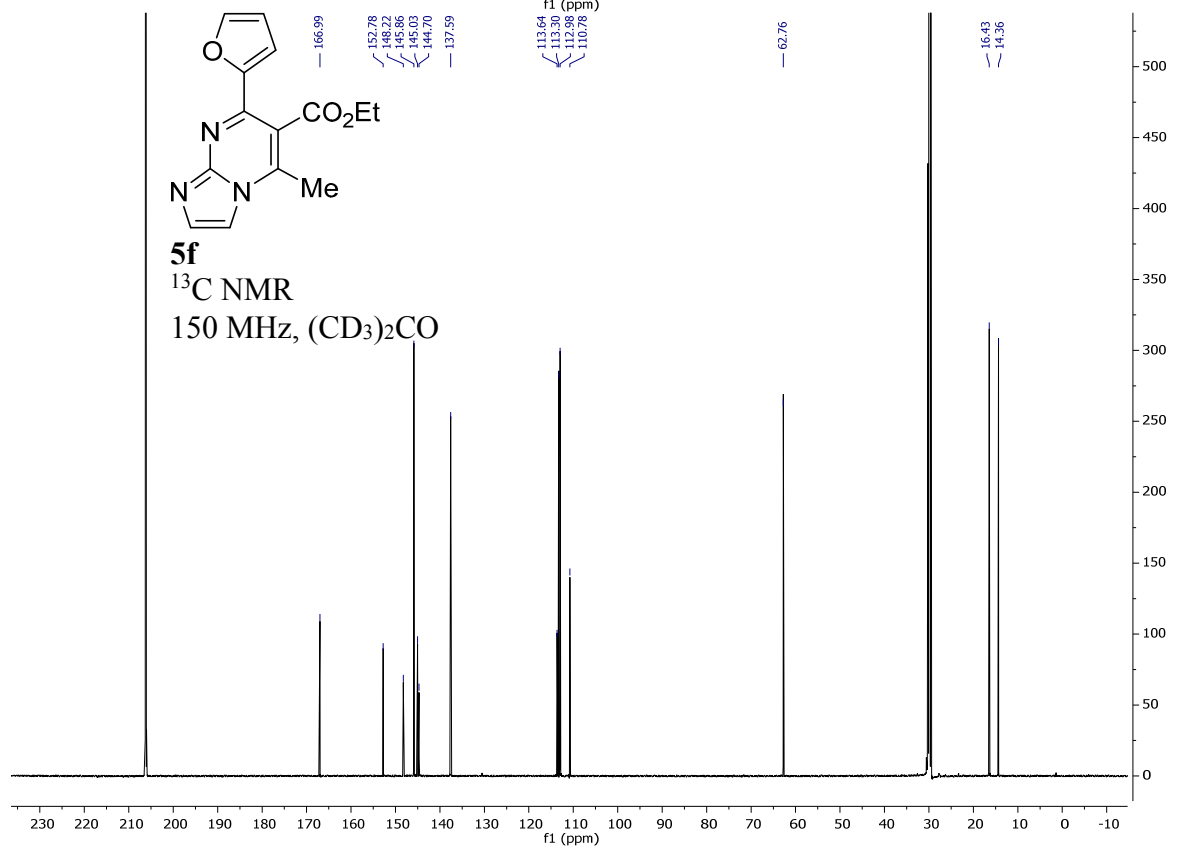

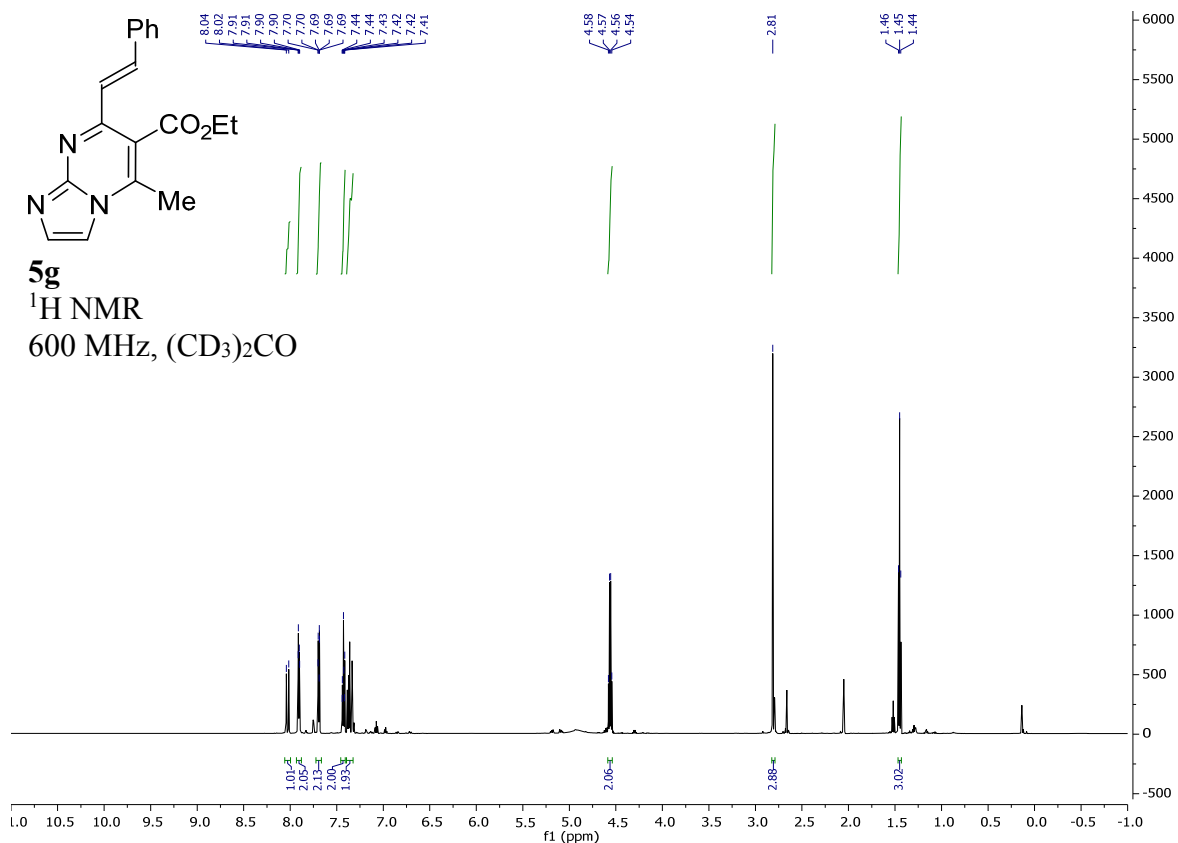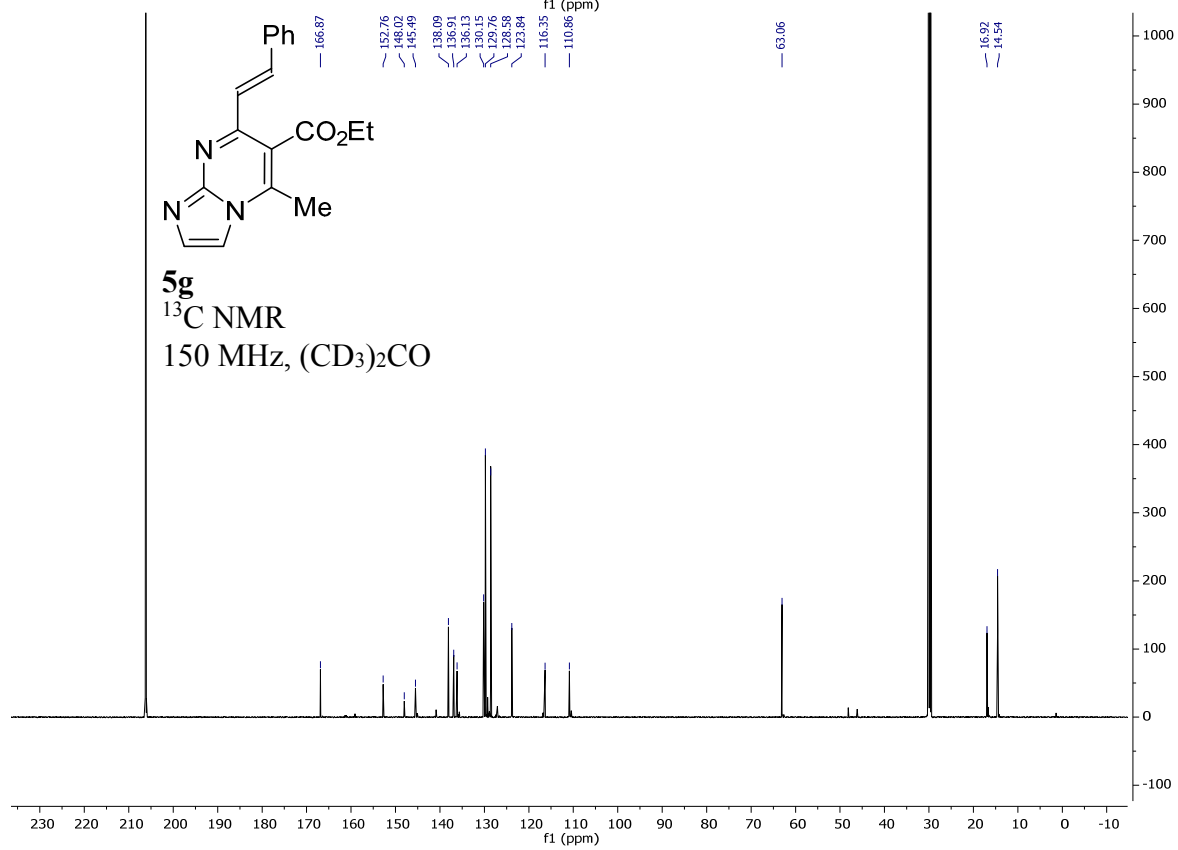

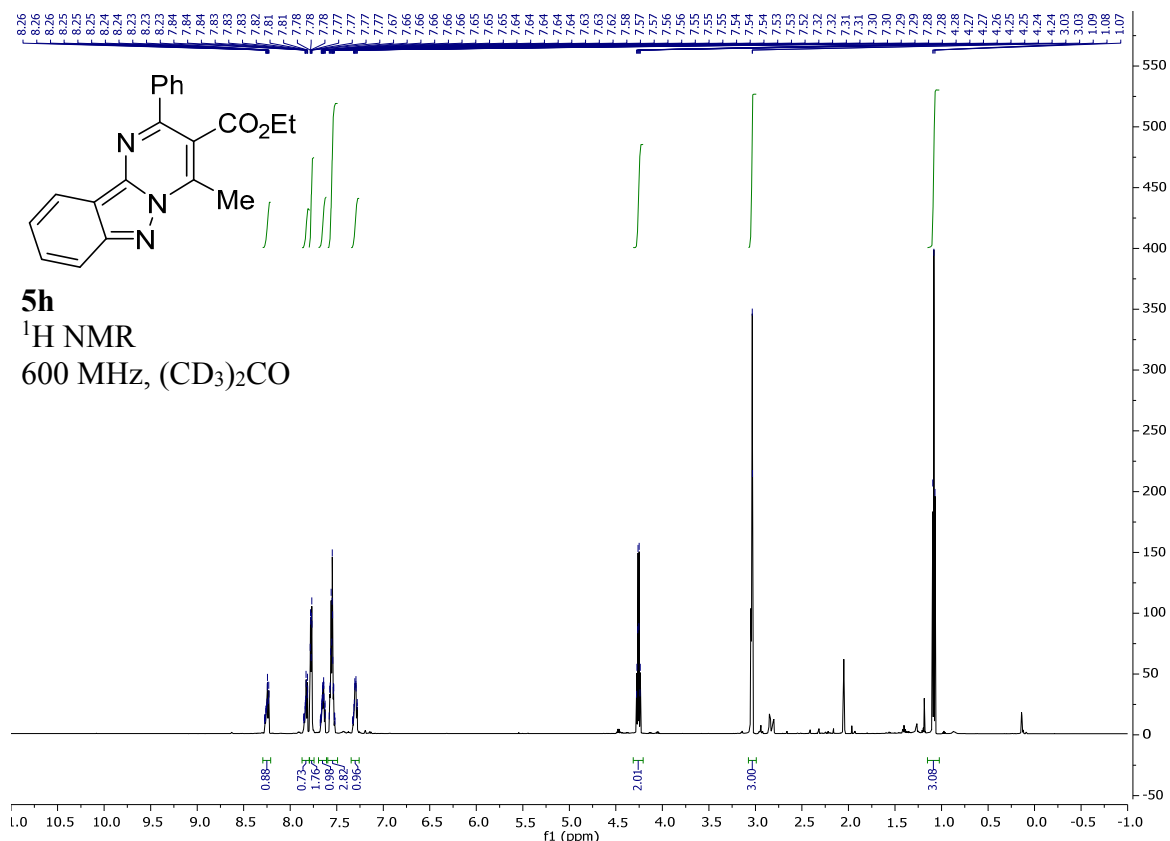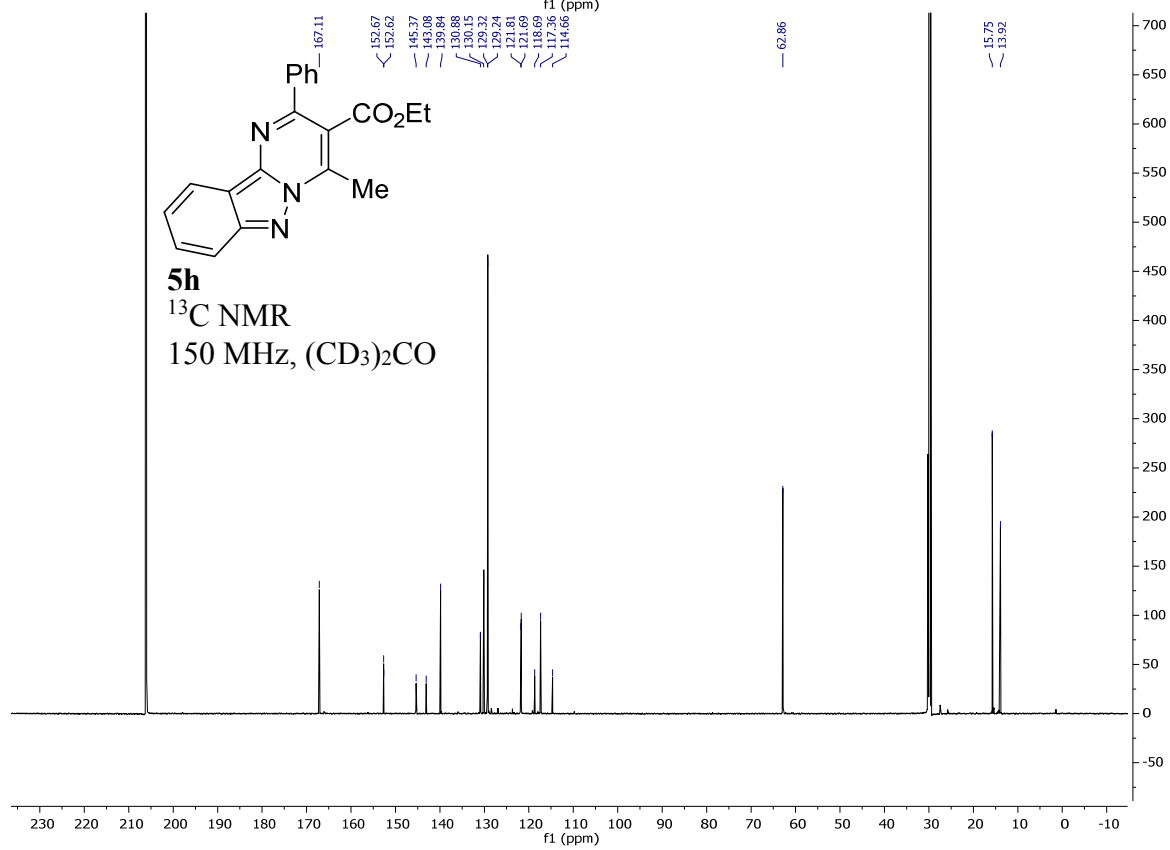

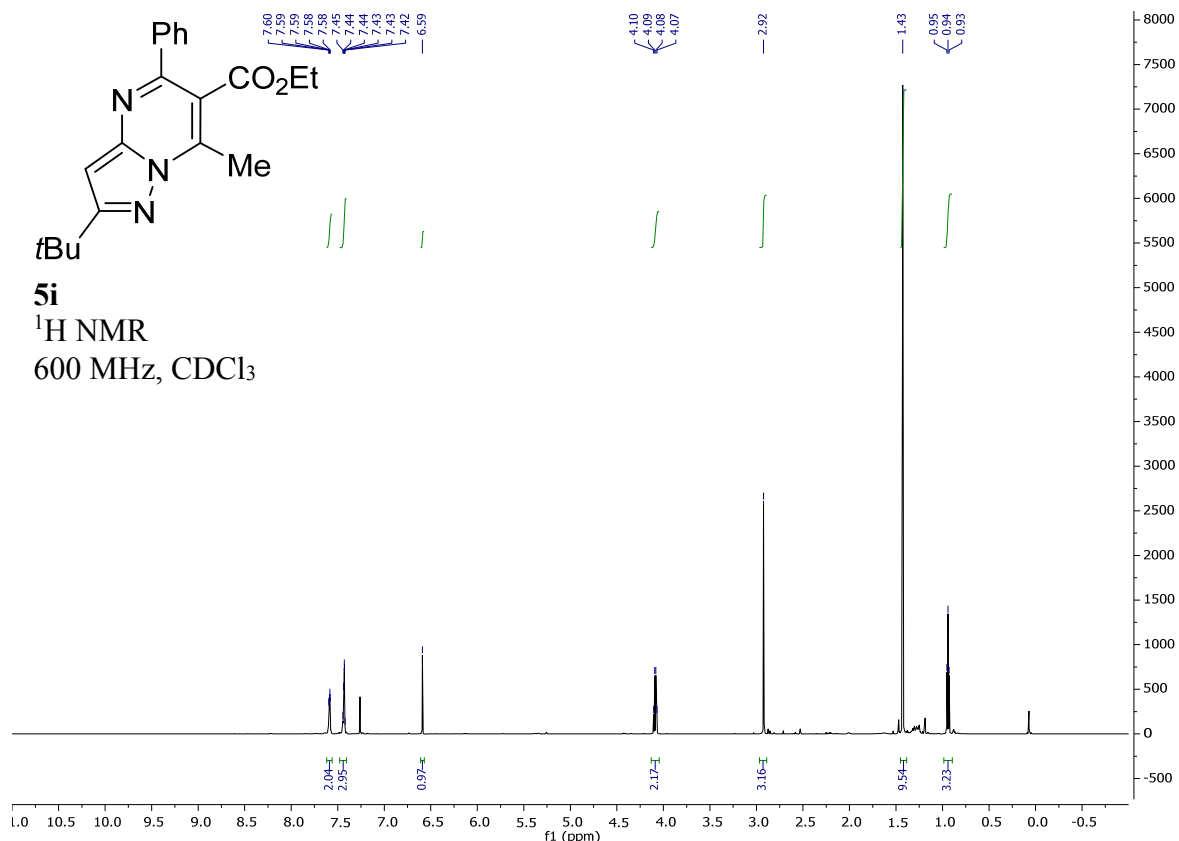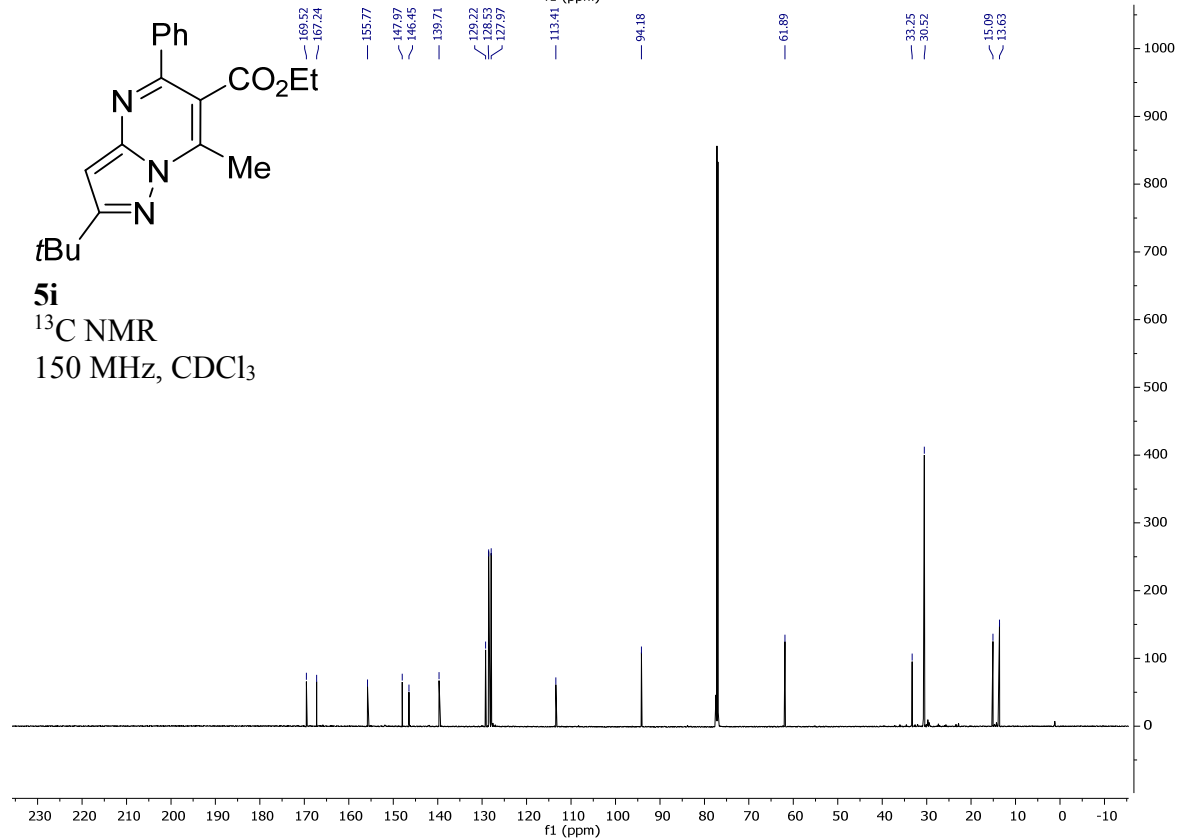

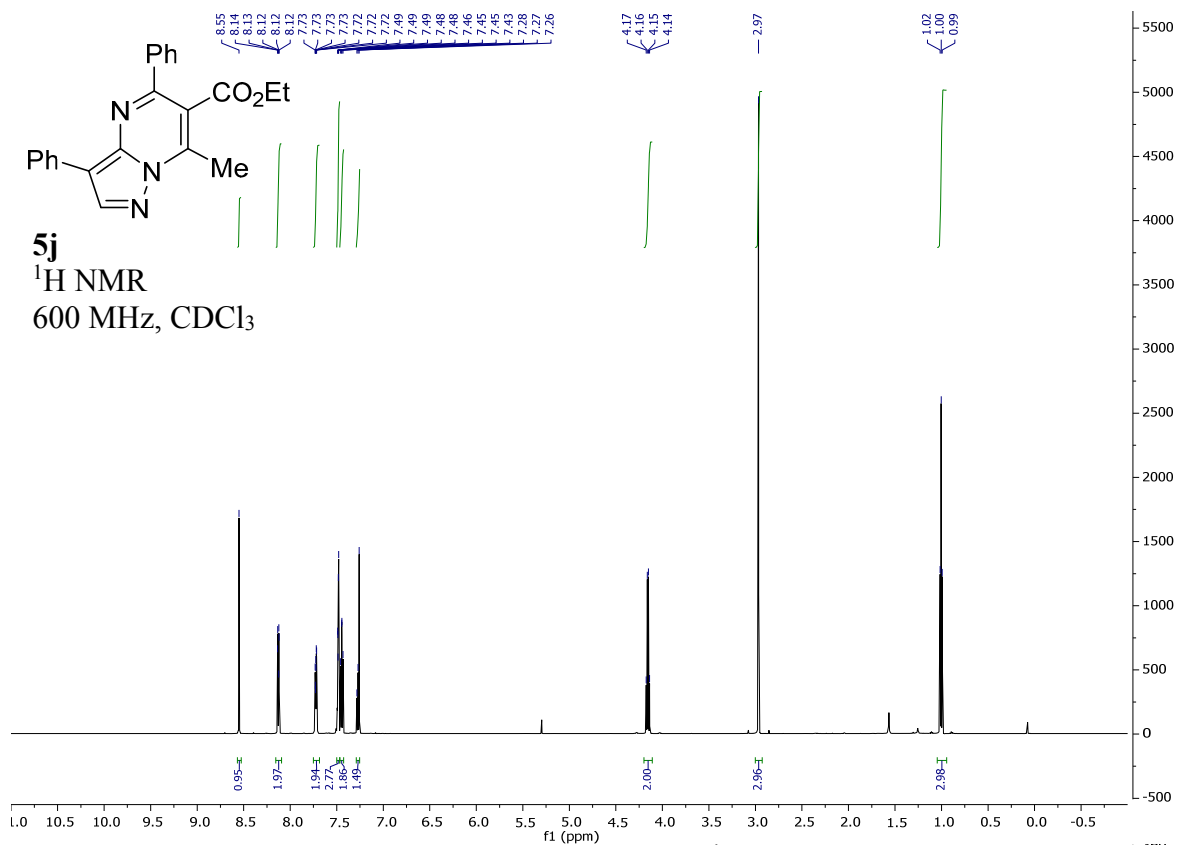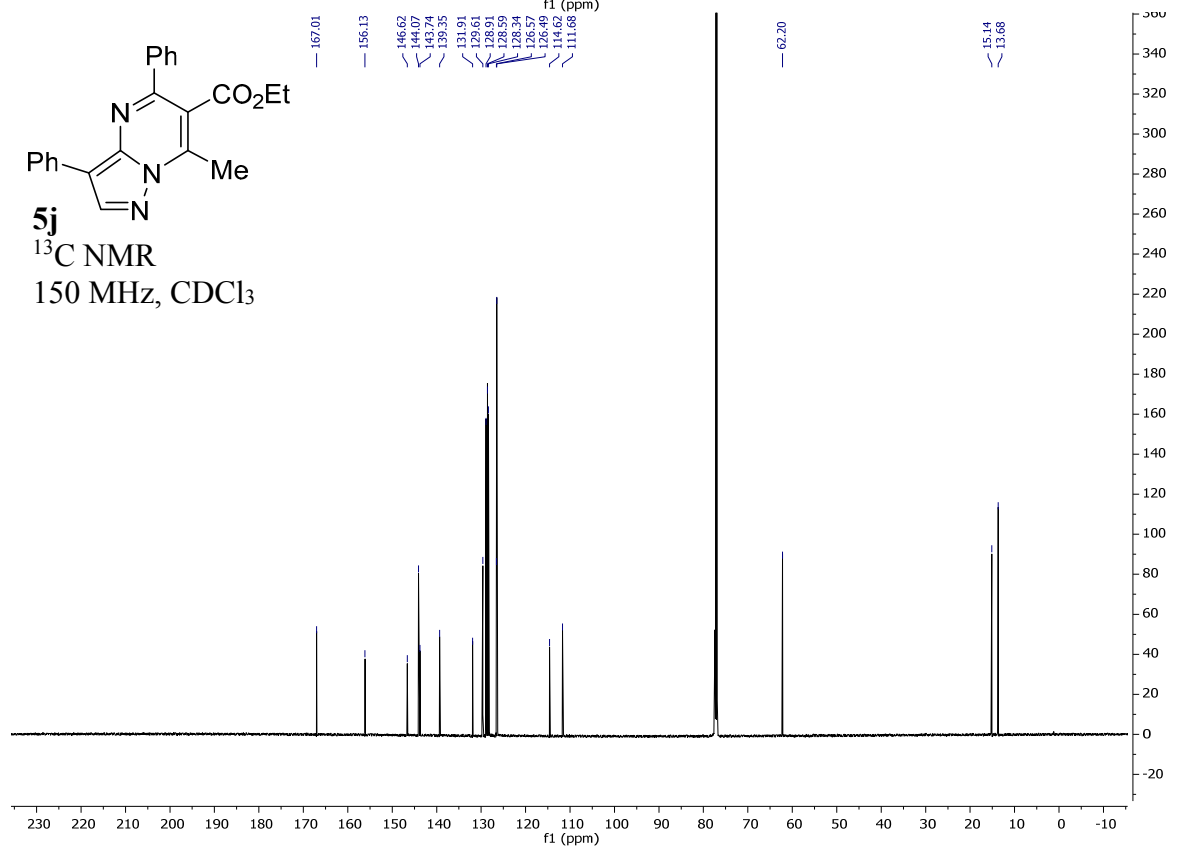



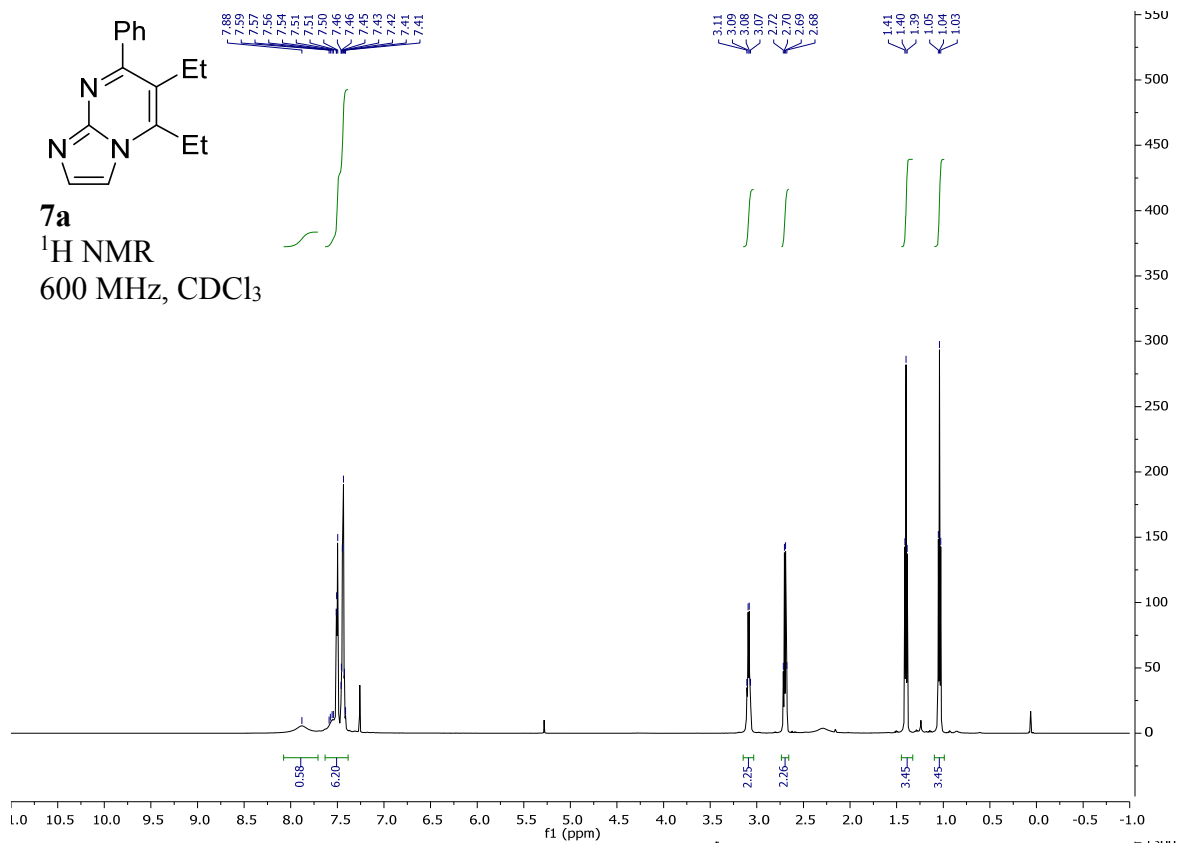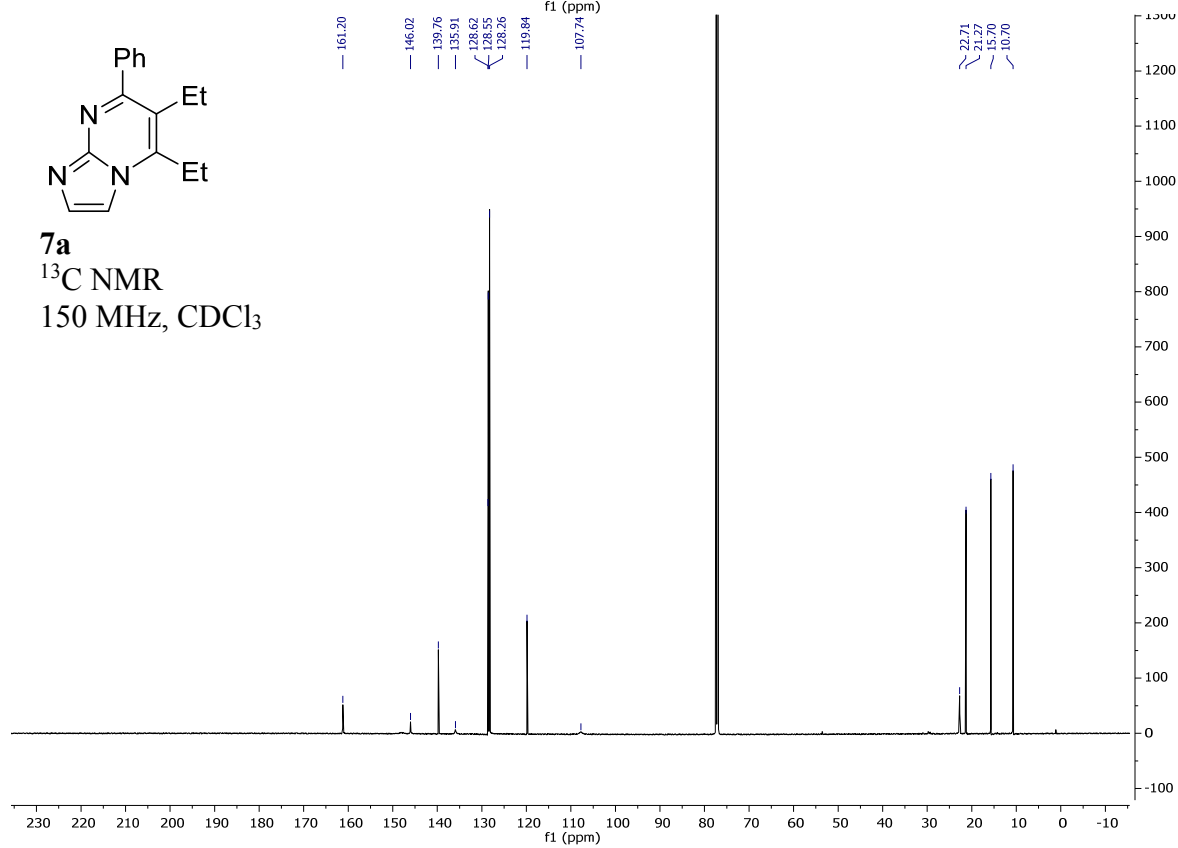

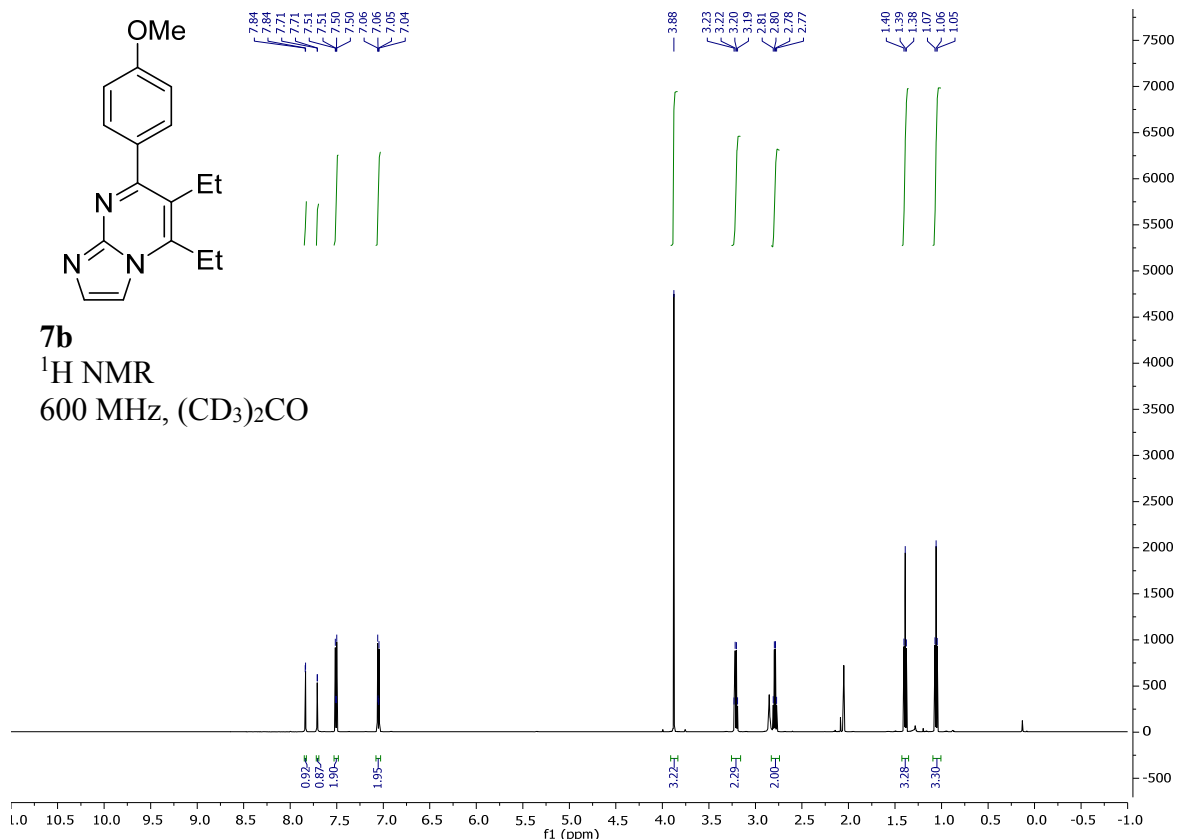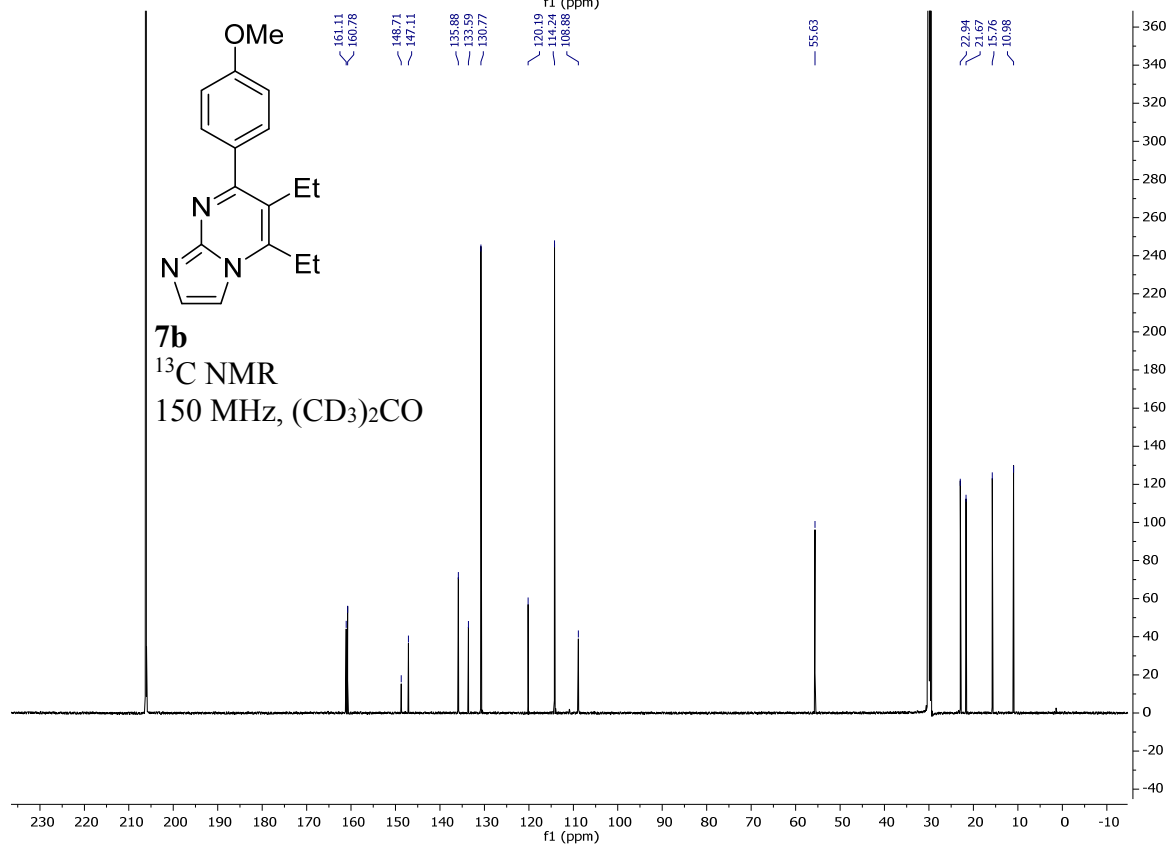

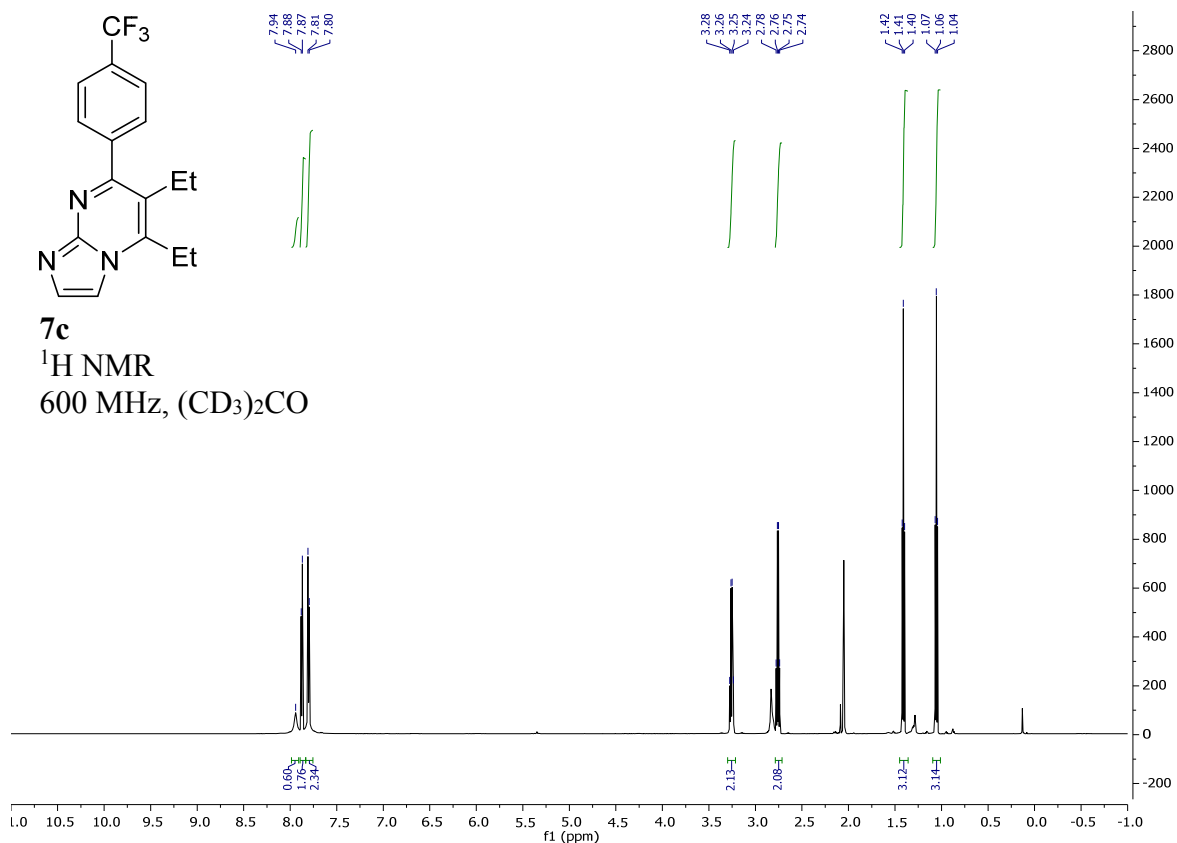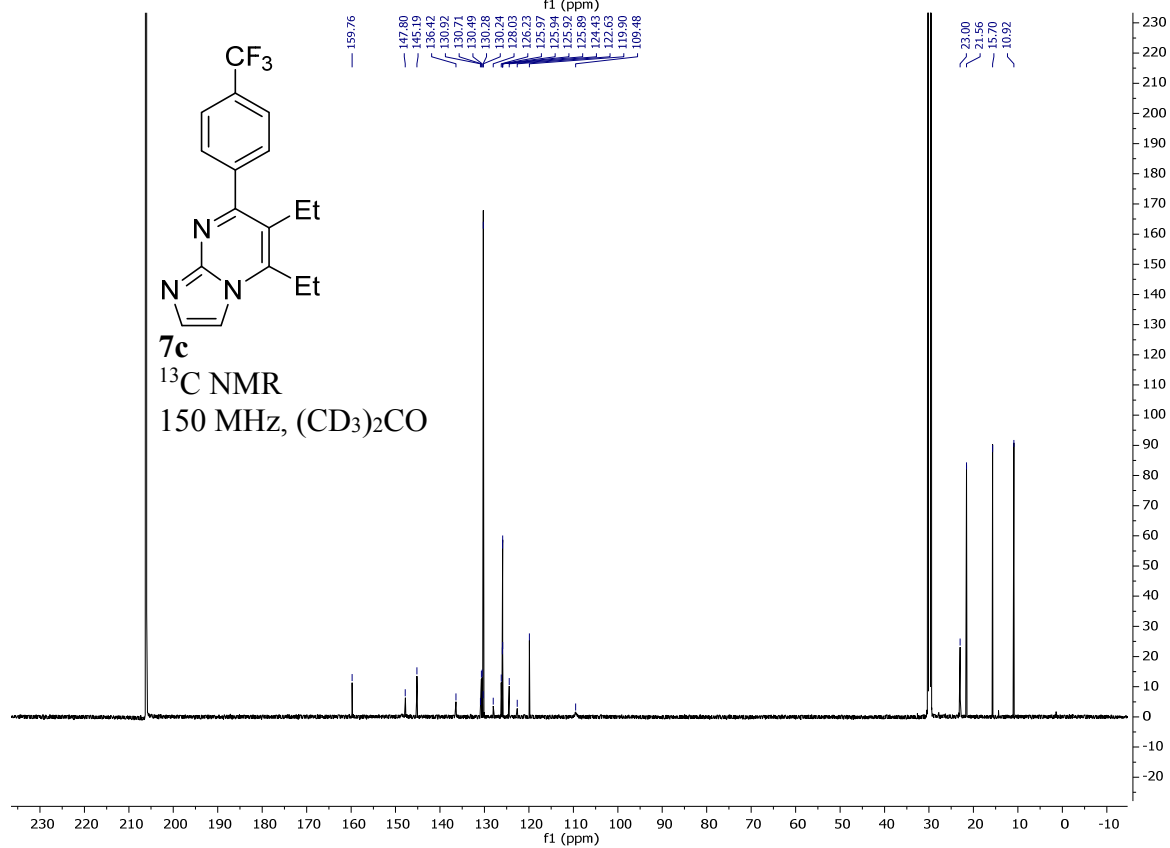

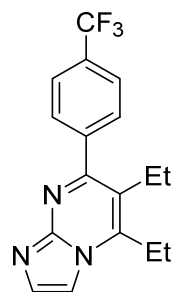

**7c**  
 $^{19}\text{F}$  NMR  
376 MHz,  $(\text{CD}_3)_2\text{CO}$

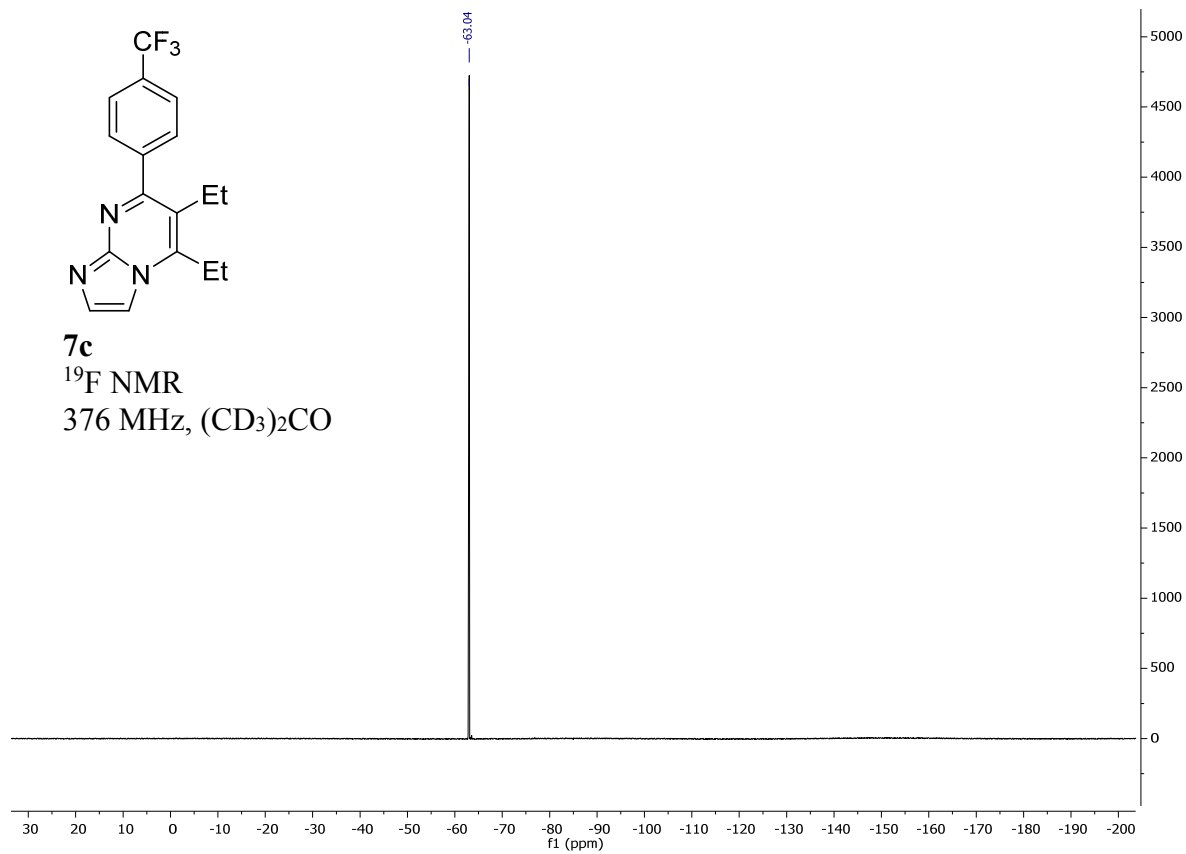

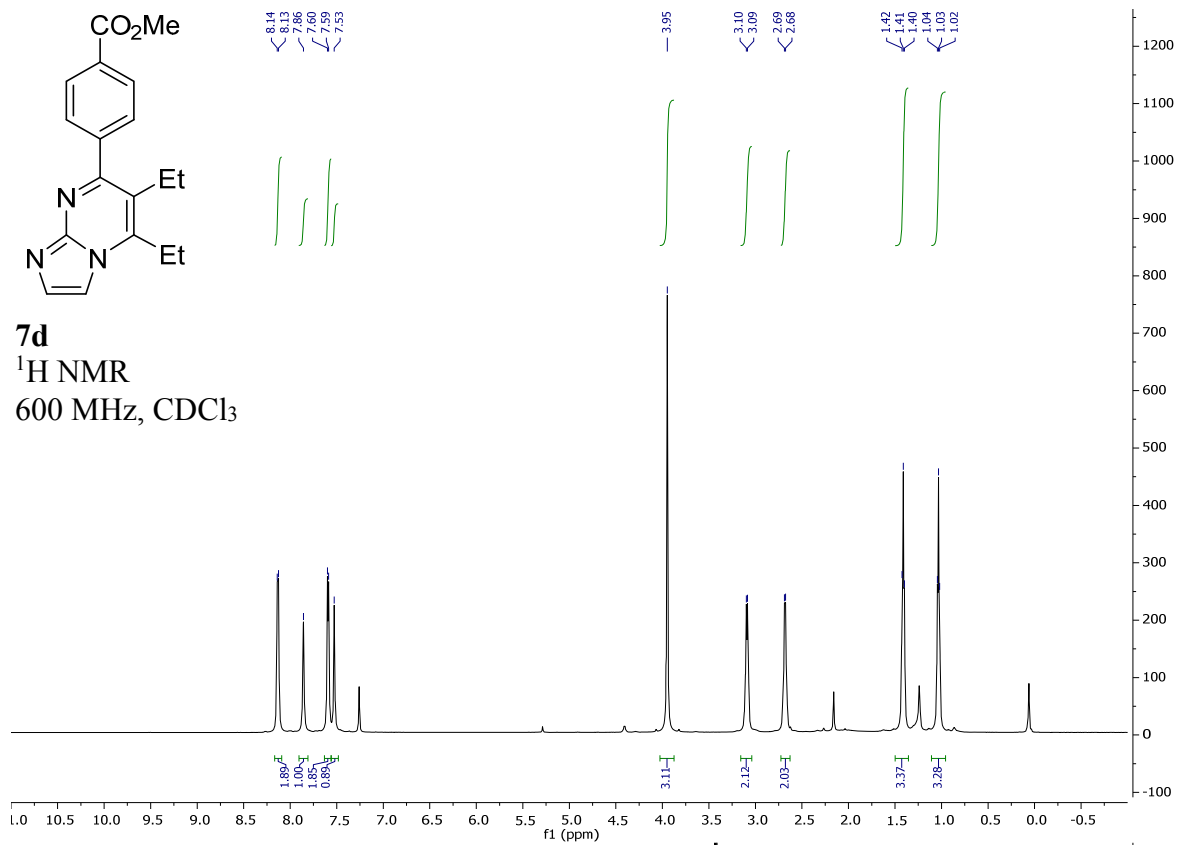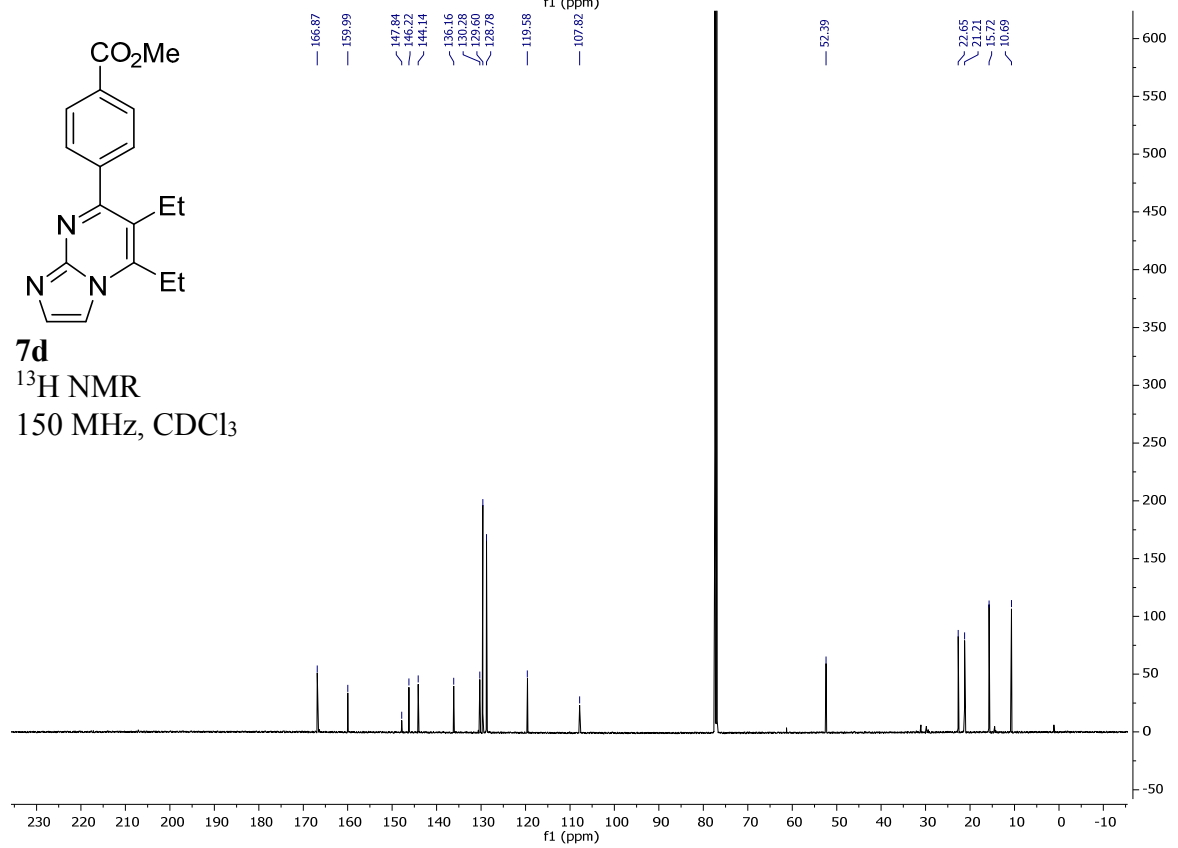

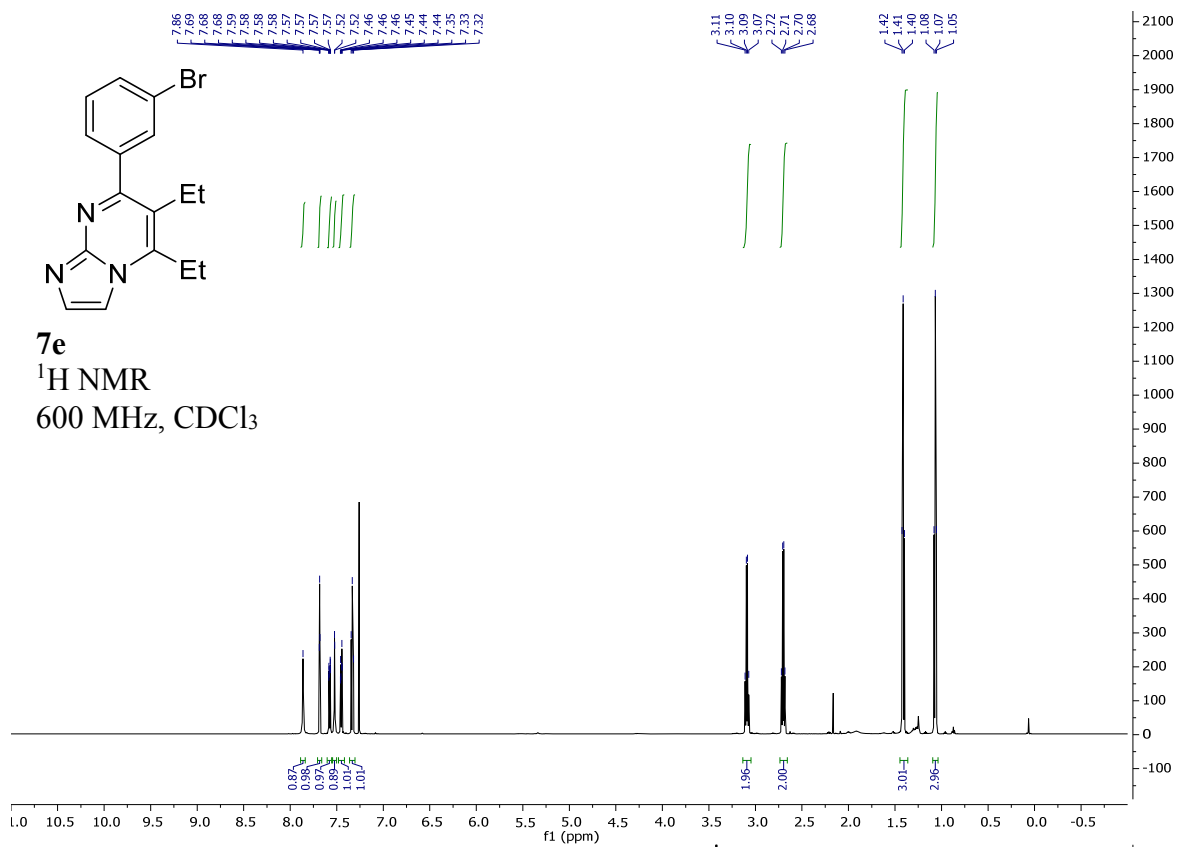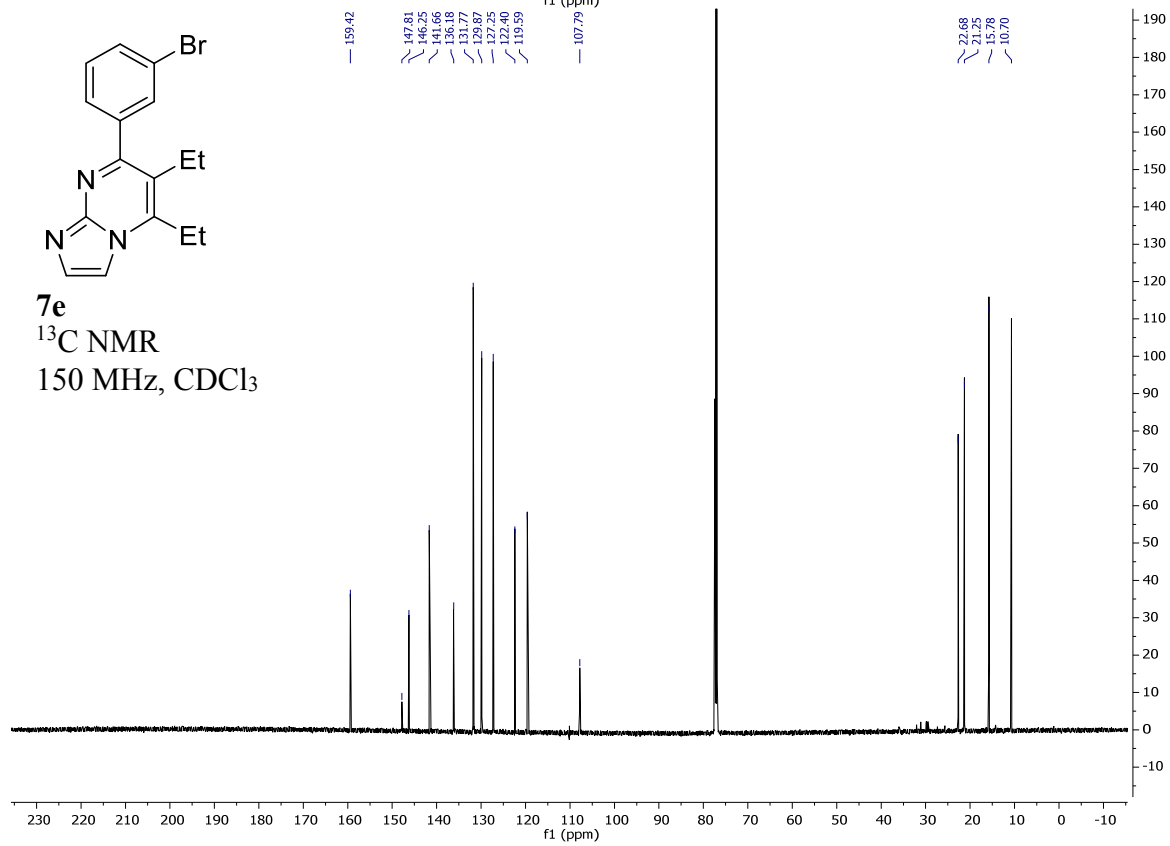

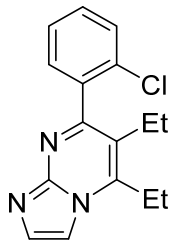

**7f**  
<sup>1</sup>H NMR  
 600 MHz, CDCl<sub>3</sub>

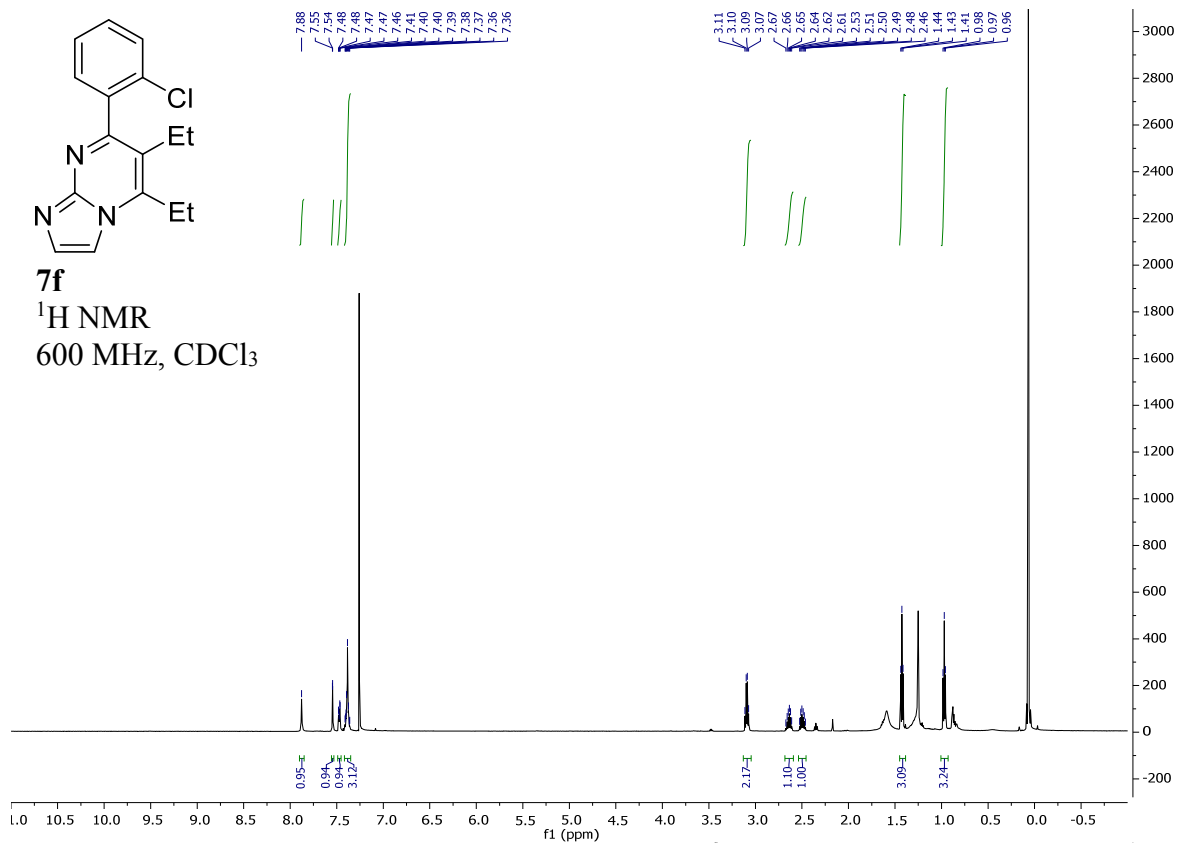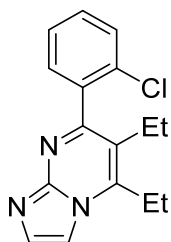

**7f**  
<sup>13</sup>C NMR  
 150 MHz, CDCl<sub>3</sub>

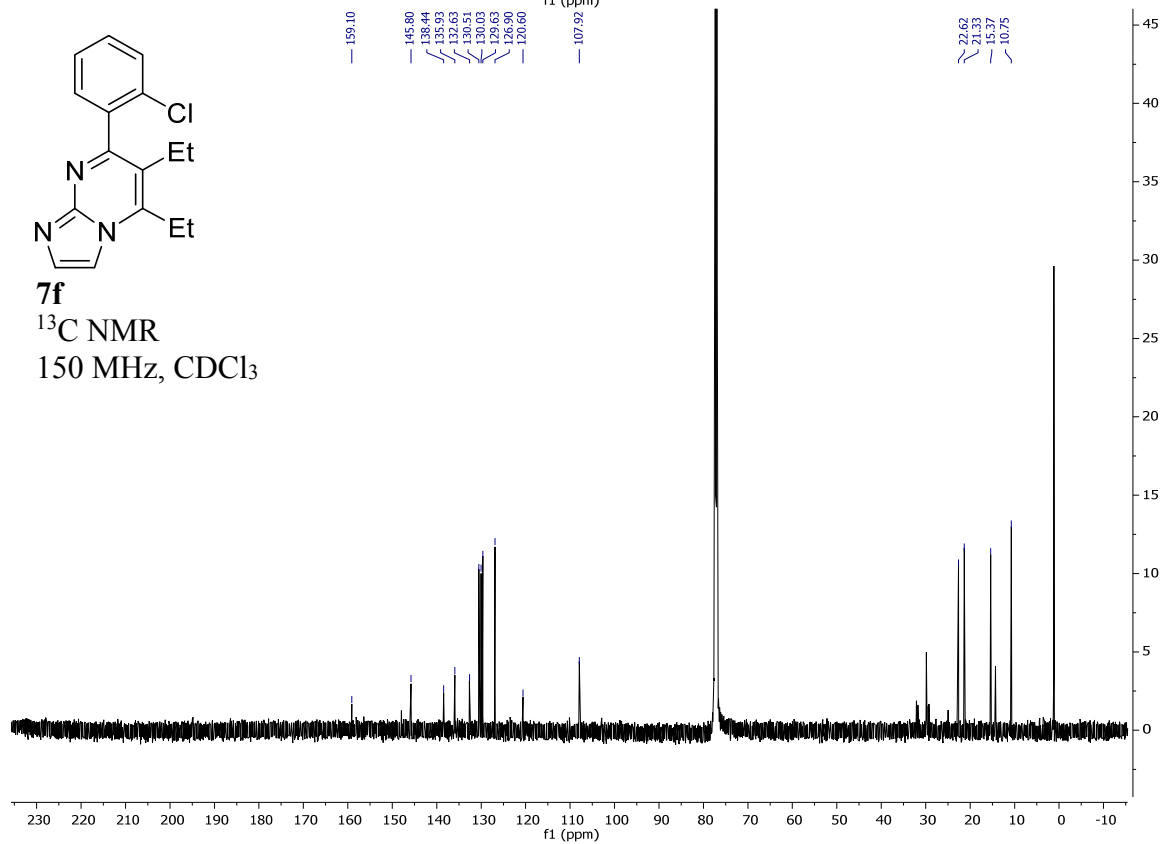

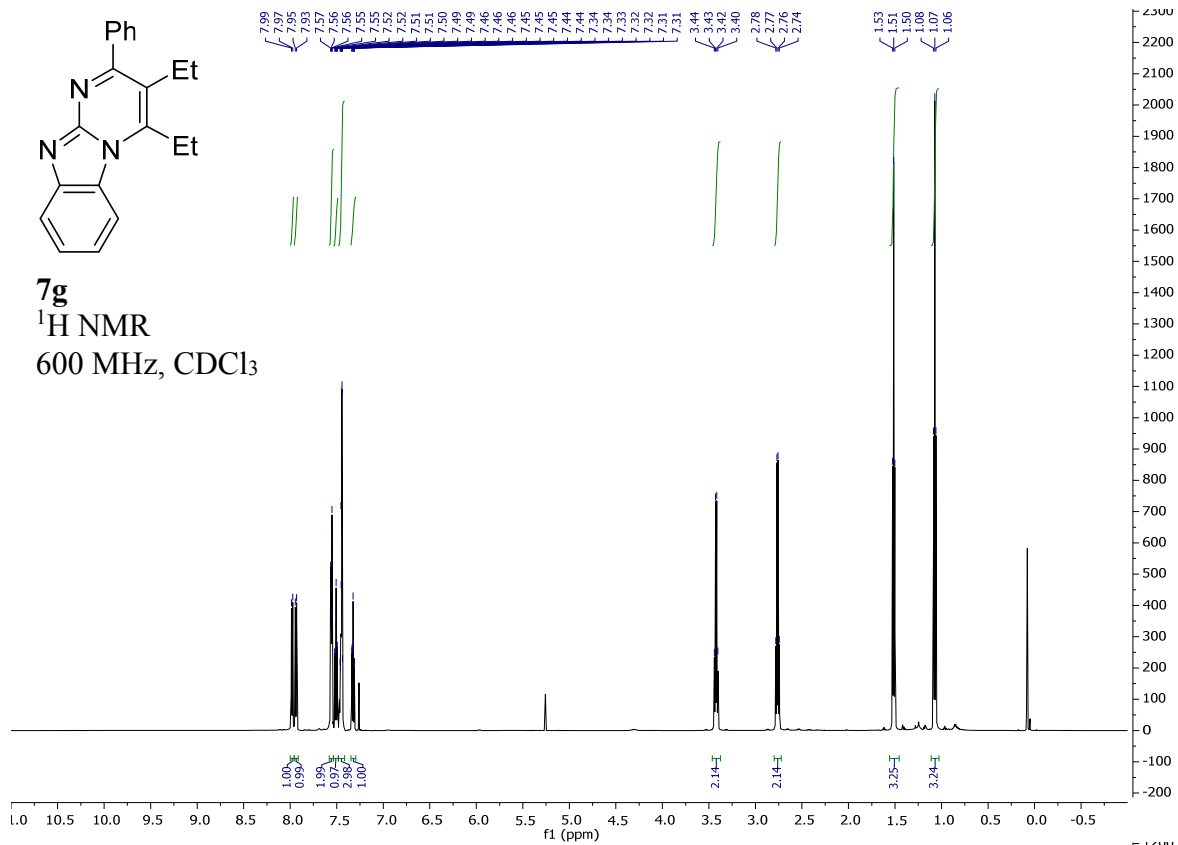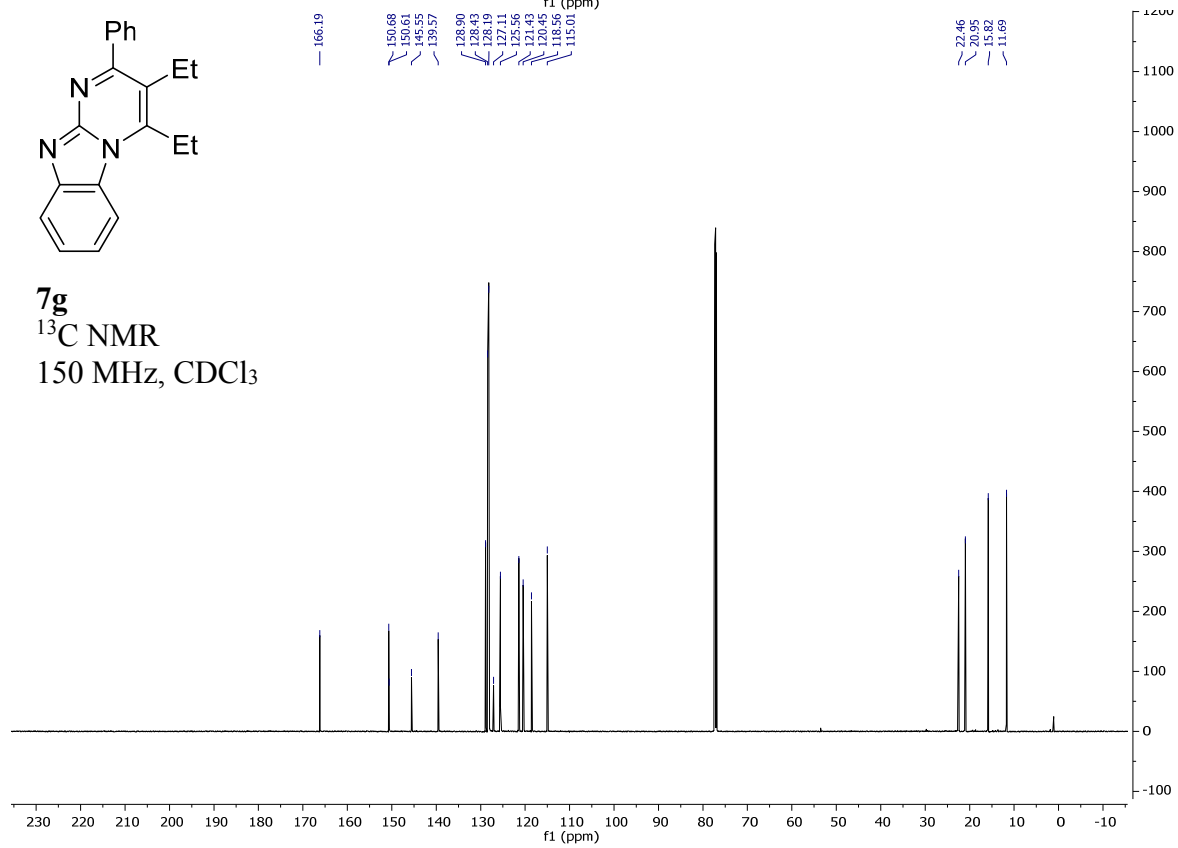



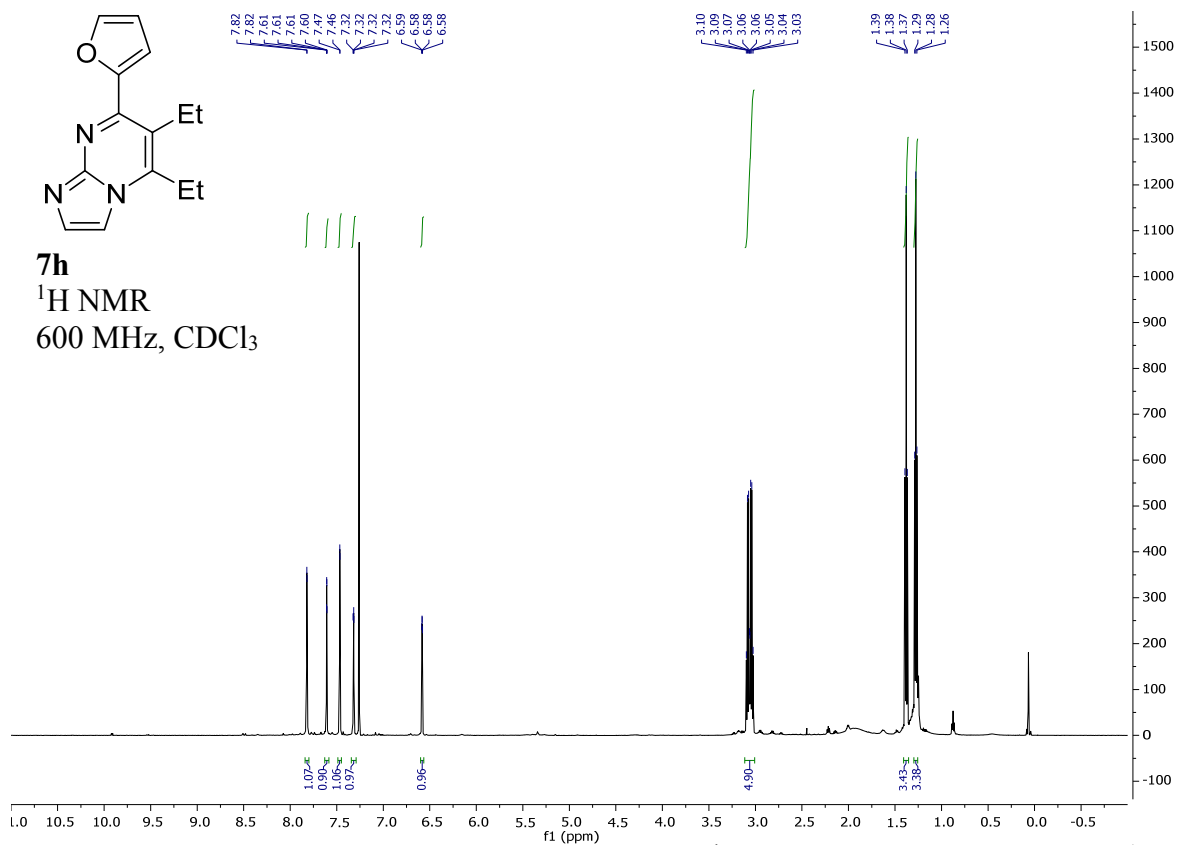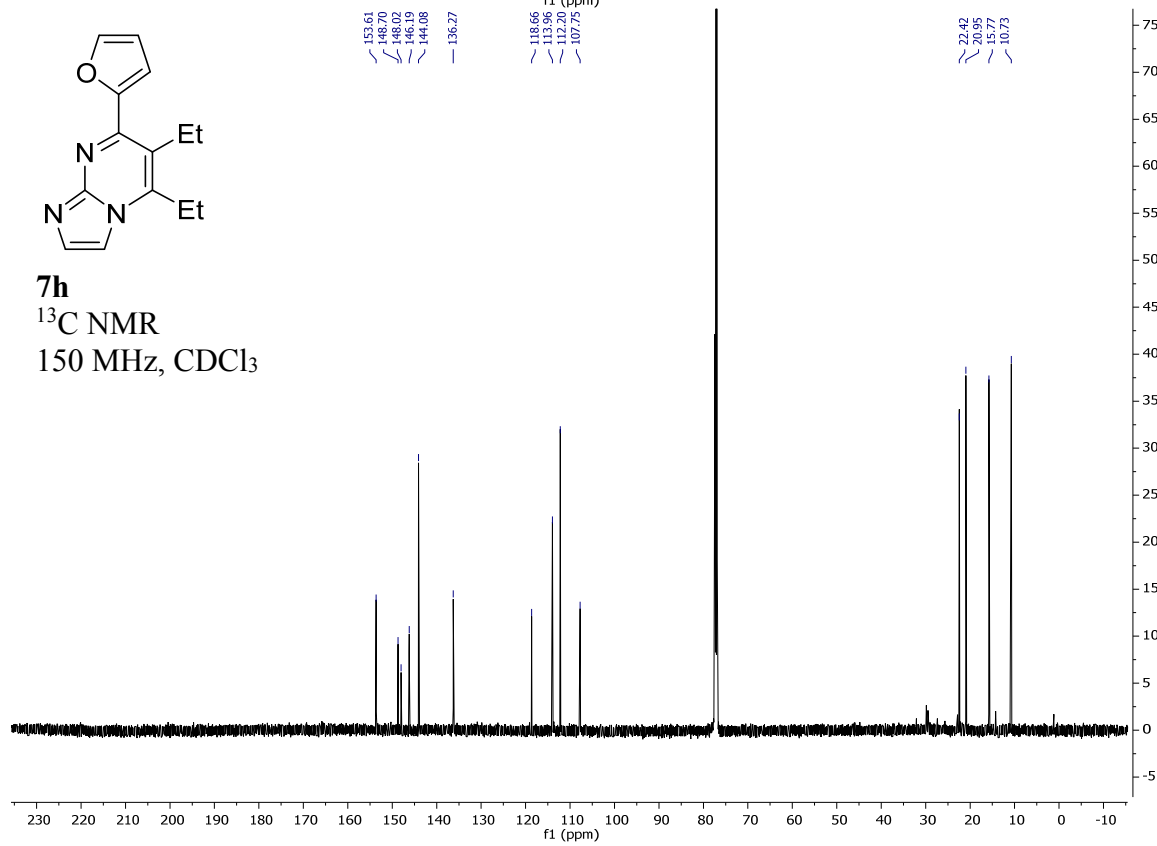

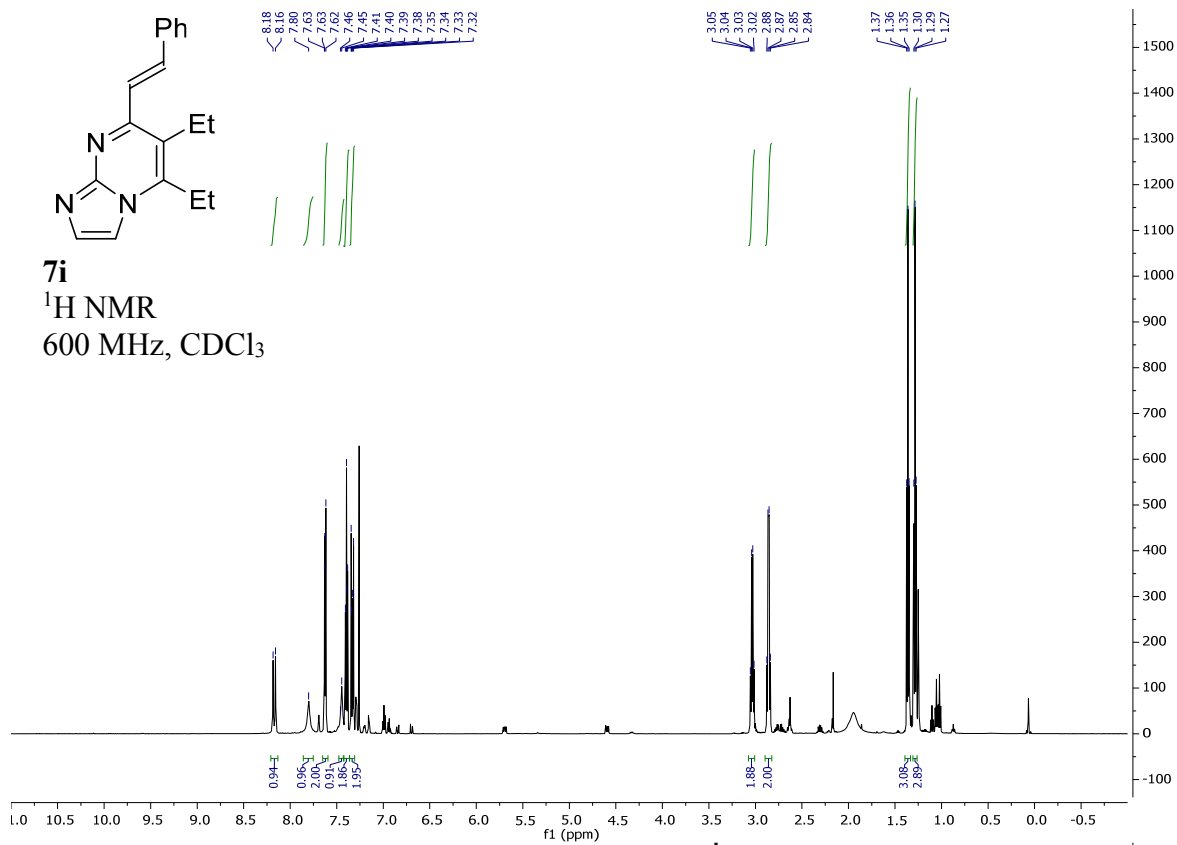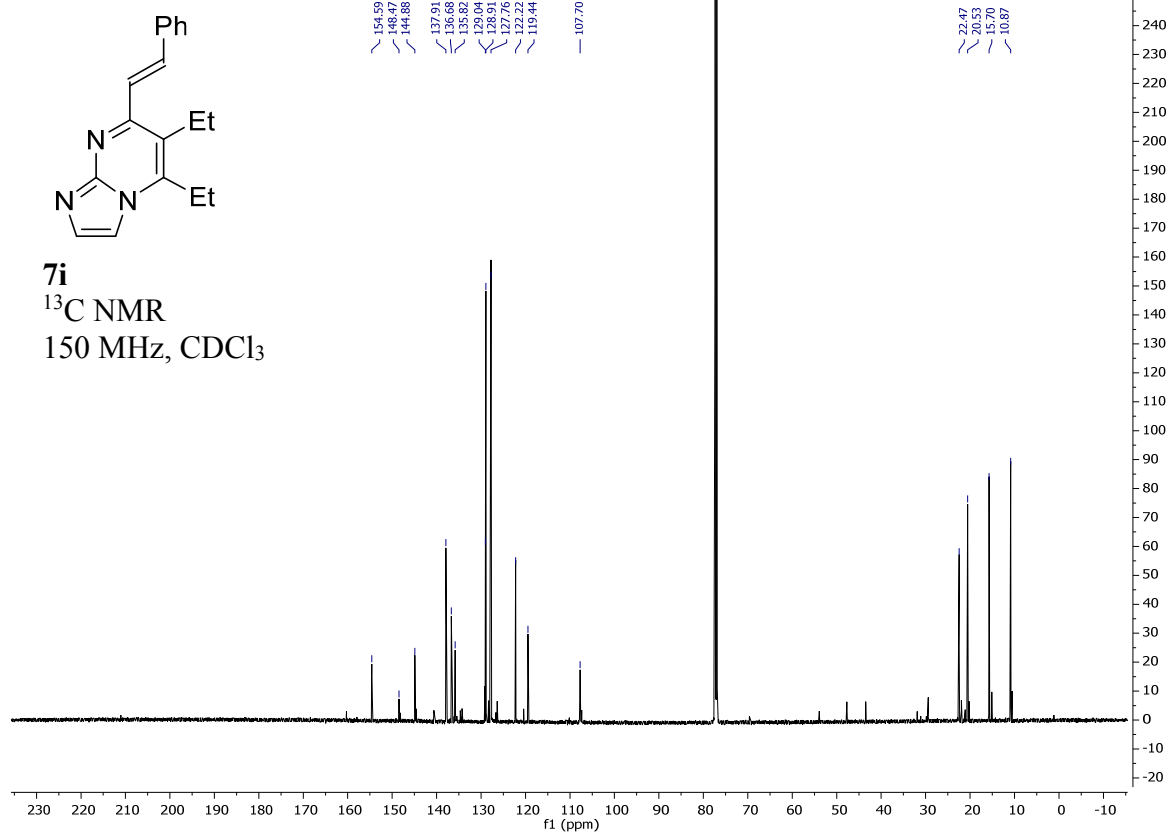

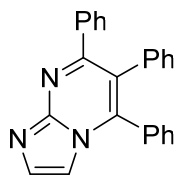

**7j**  
<sup>1</sup>H NMR  
 600 MHz, CDCl<sub>3</sub>

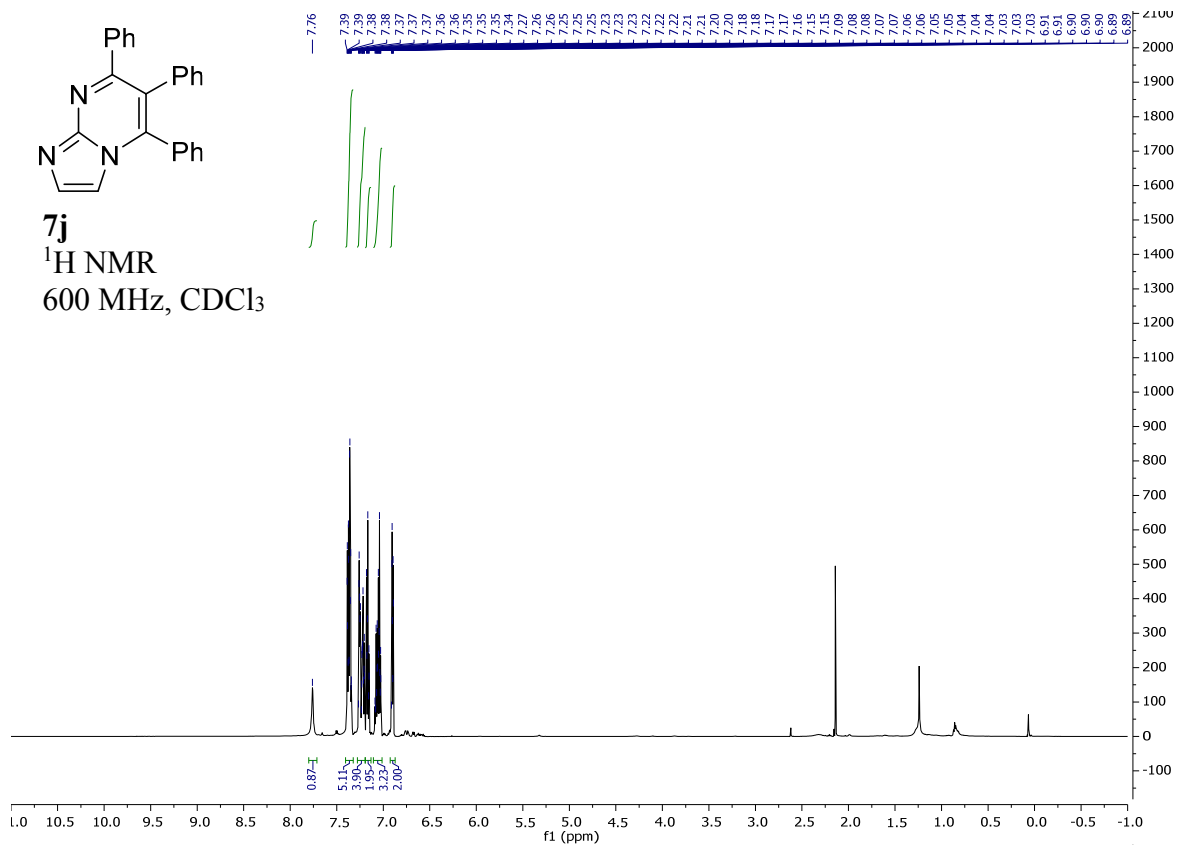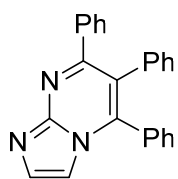

**7j**  
<sup>13</sup>C NMR  
 150 MHz, CDCl<sub>3</sub>

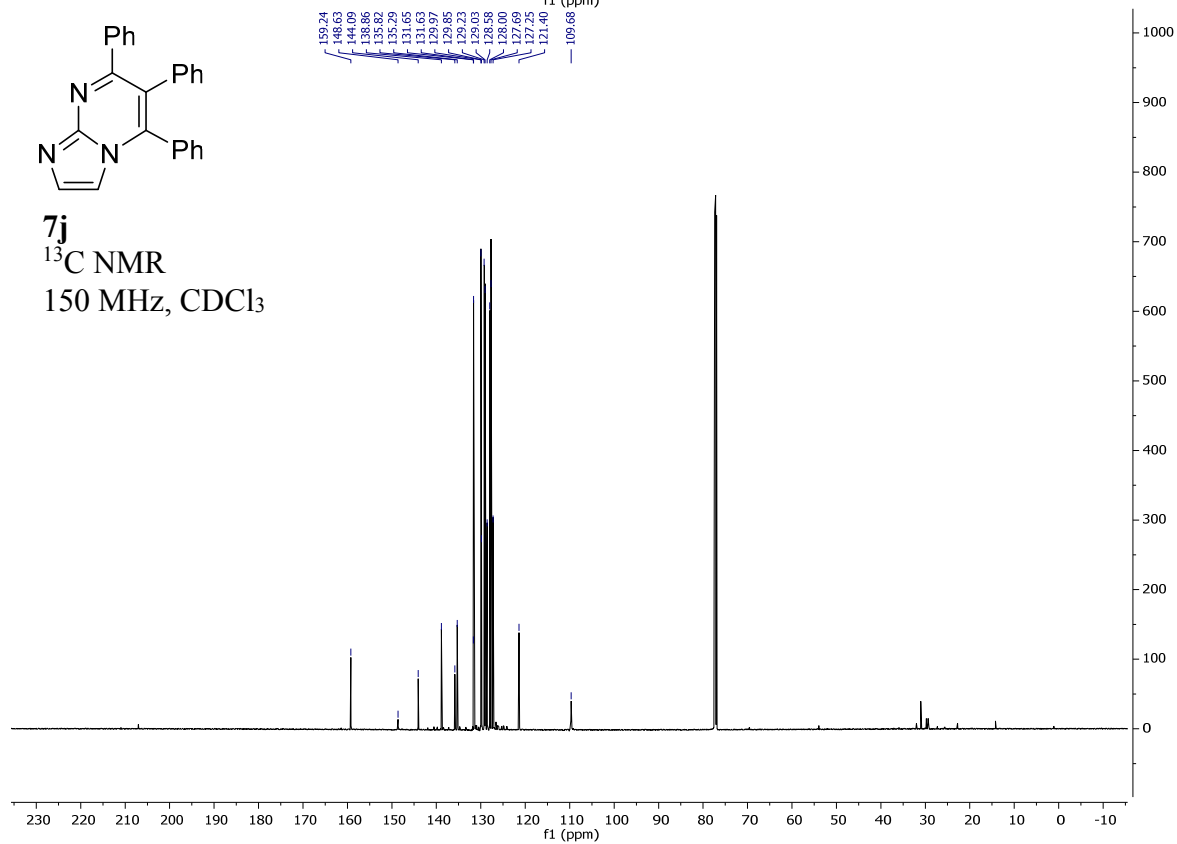

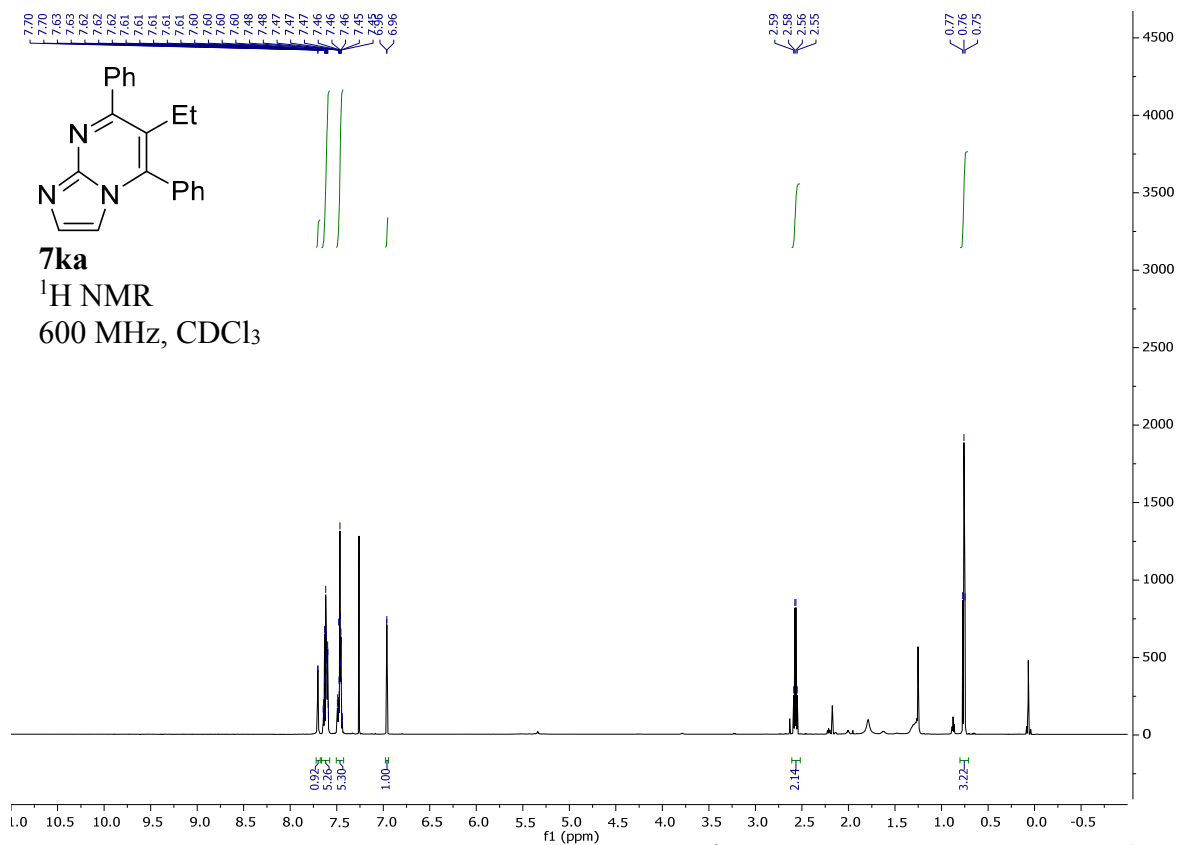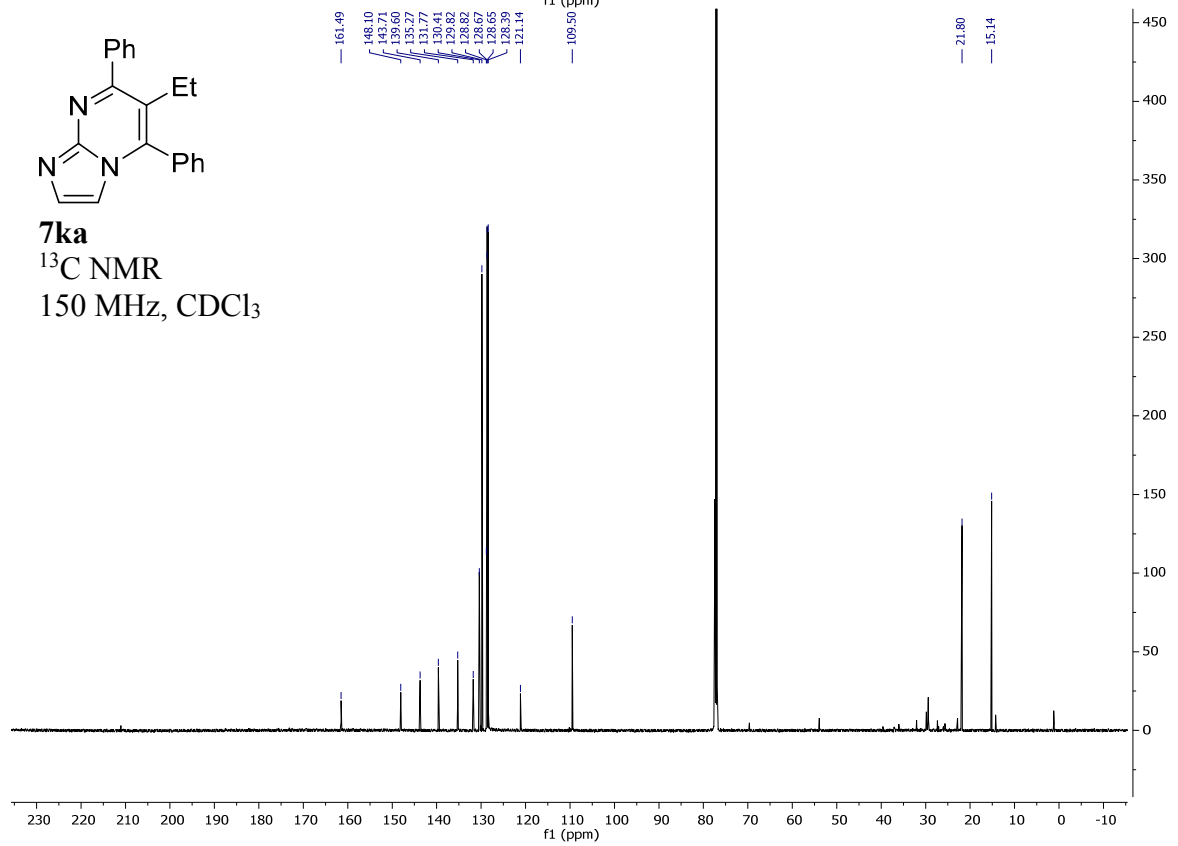

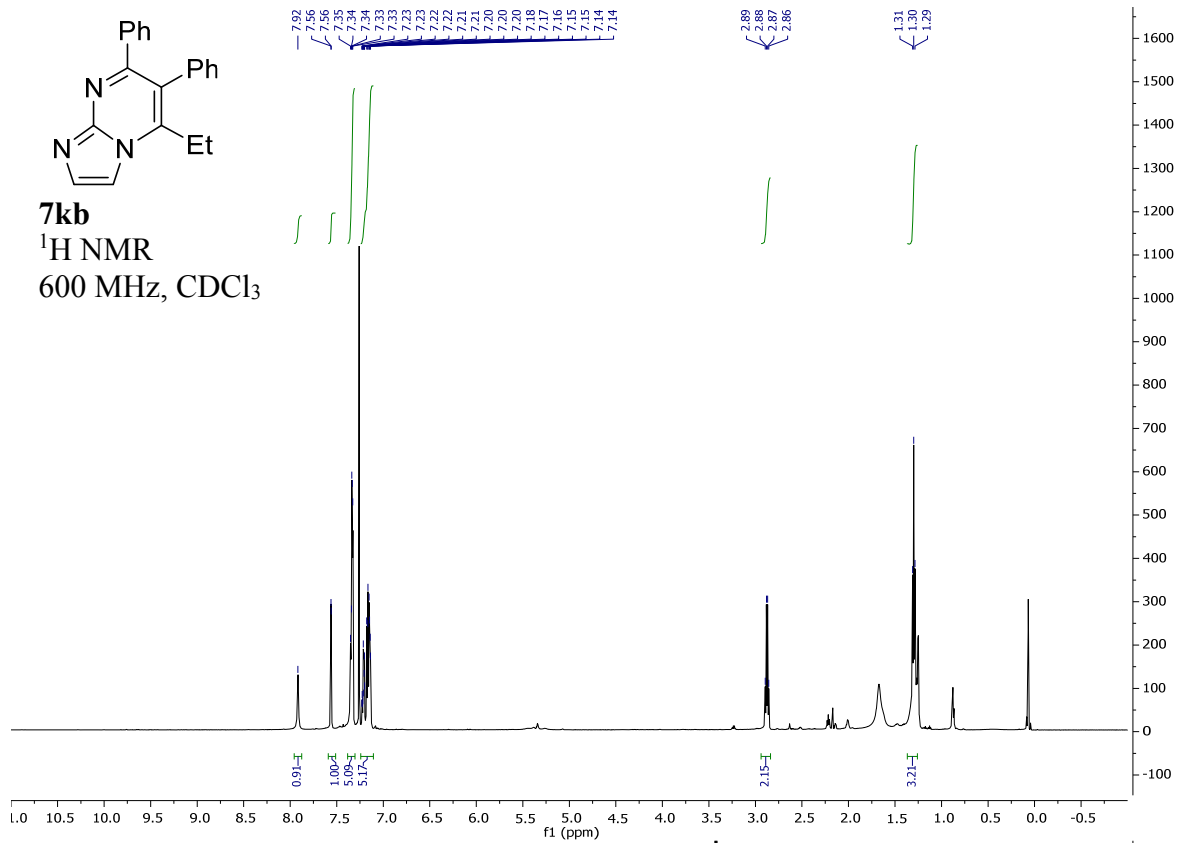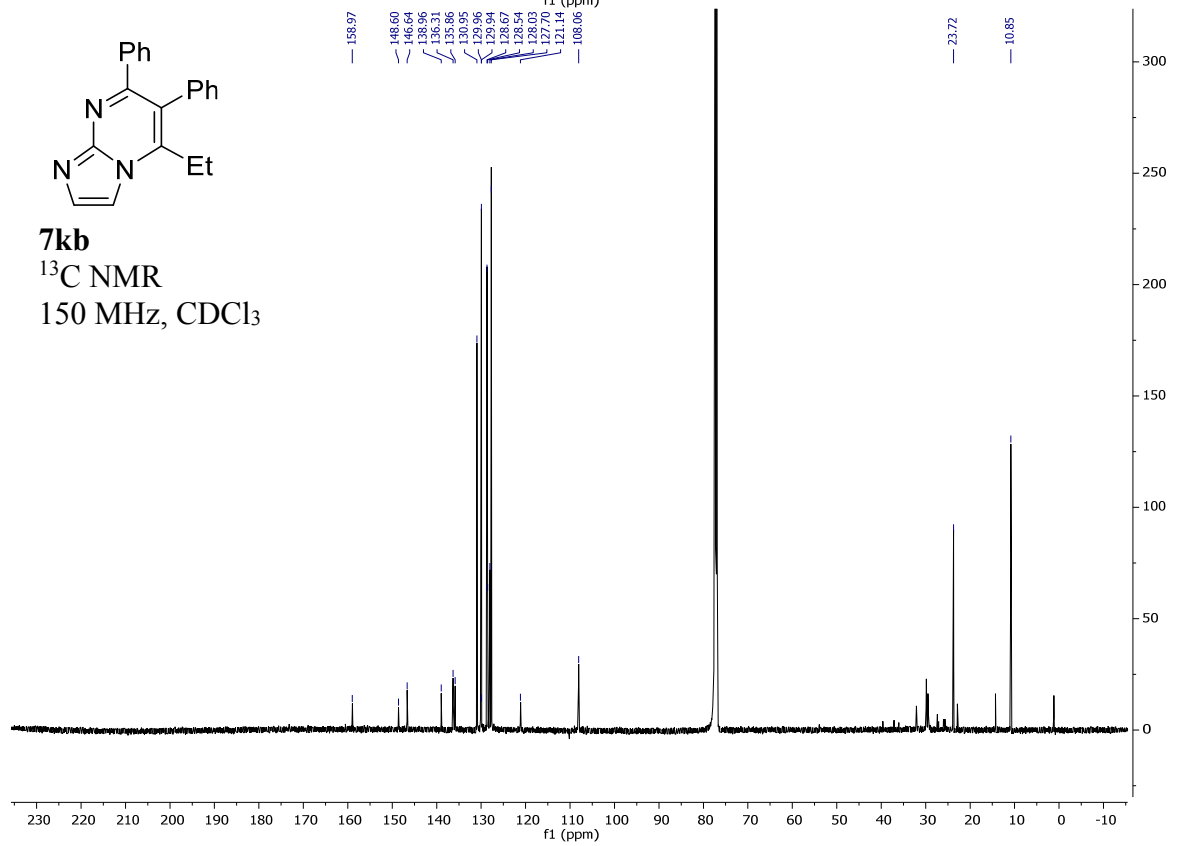

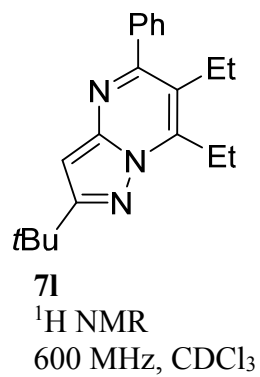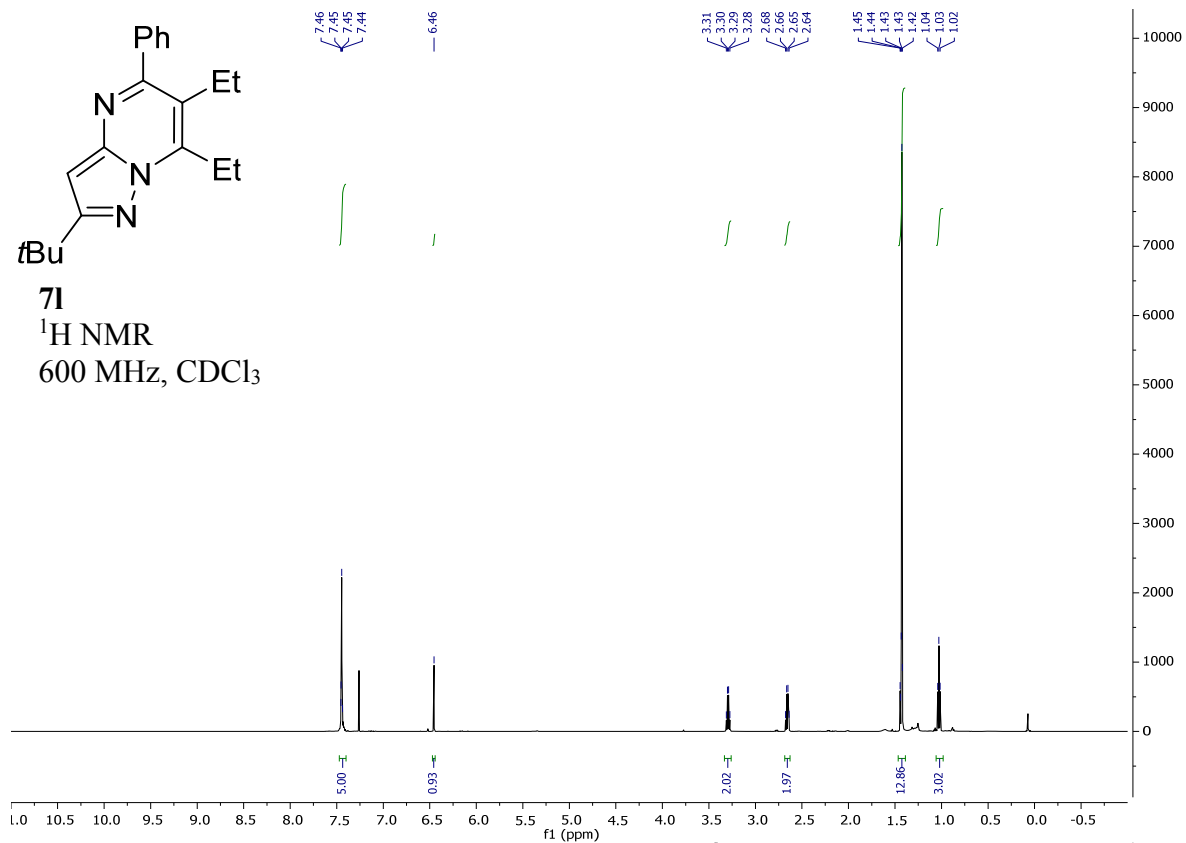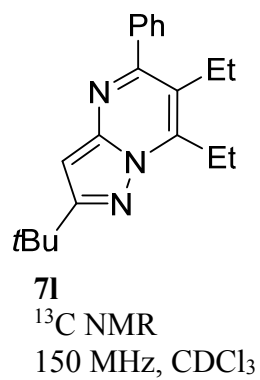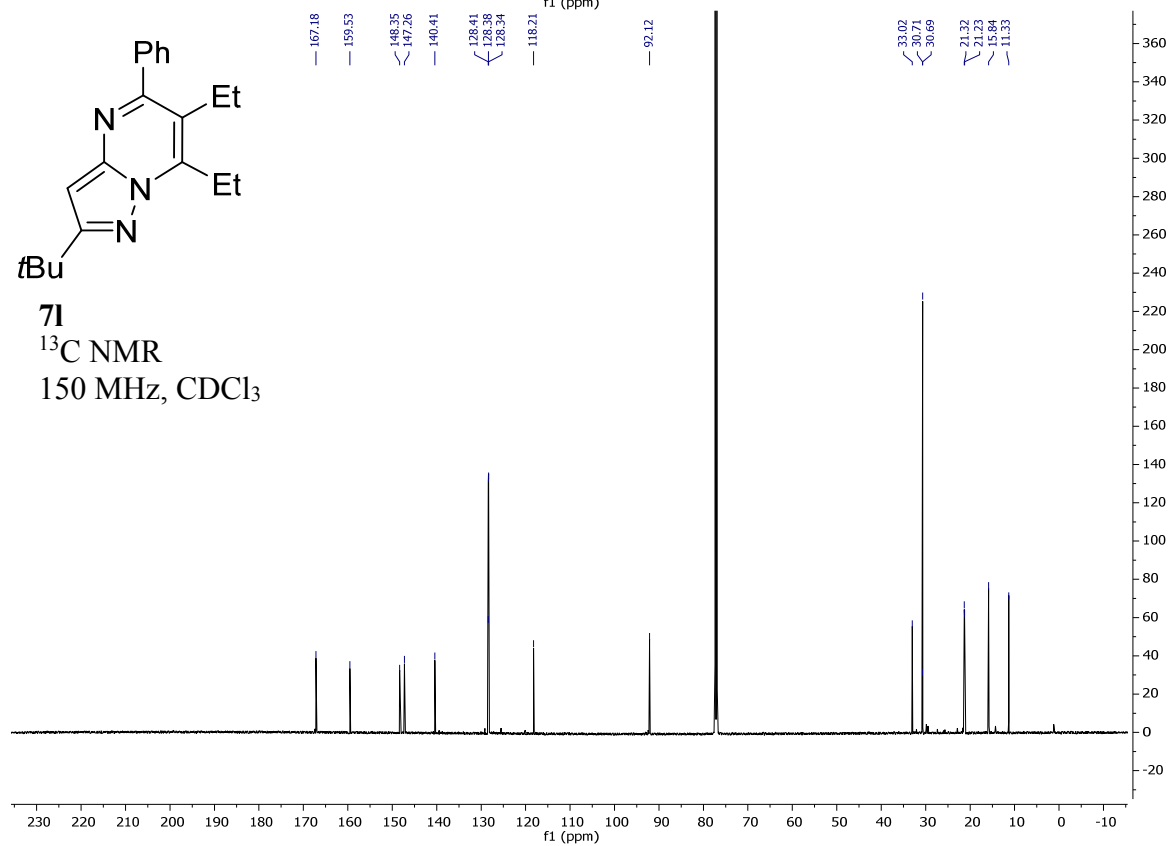

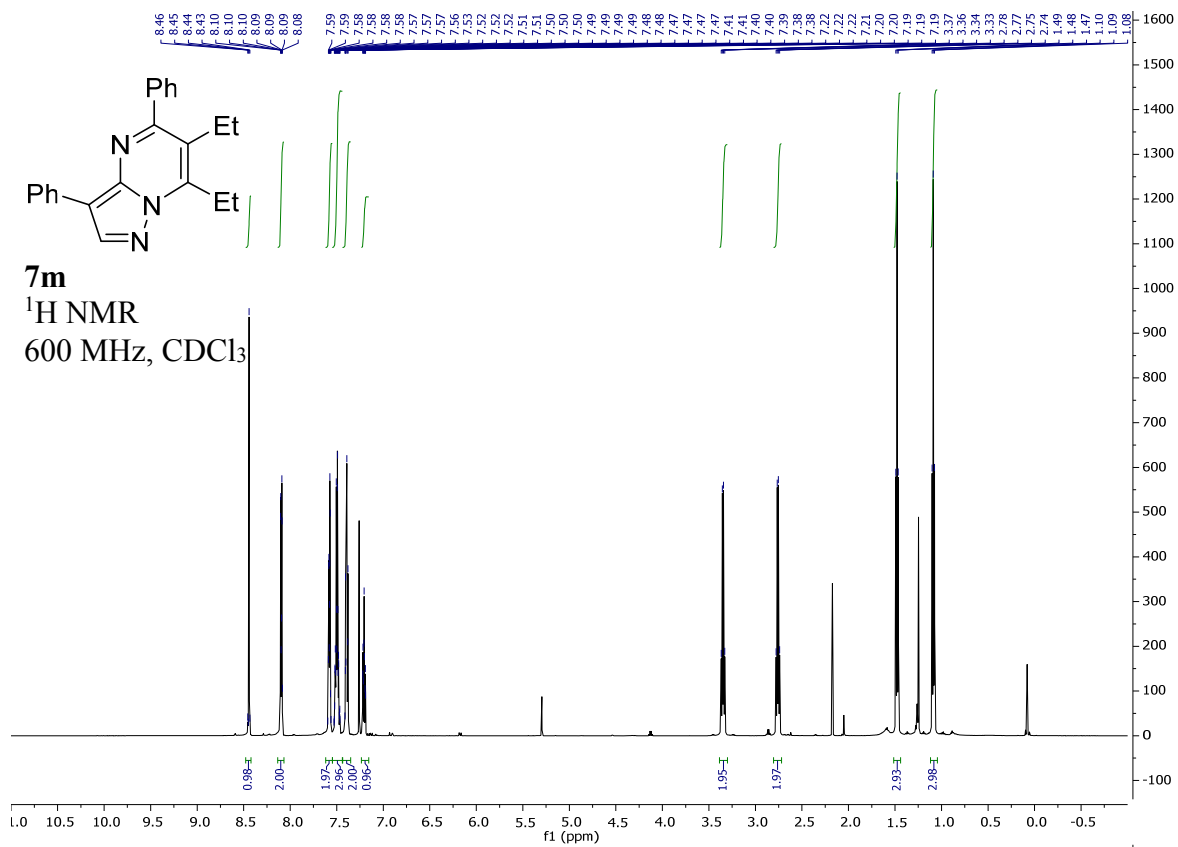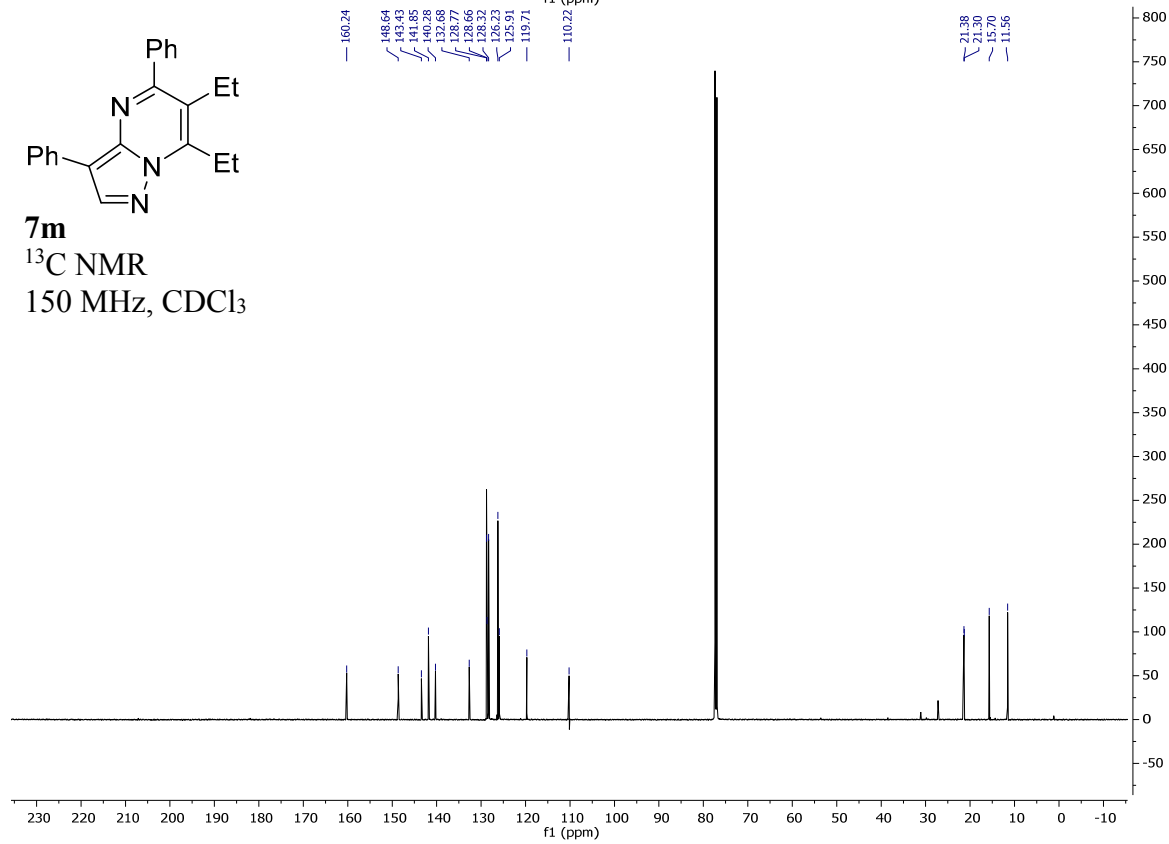





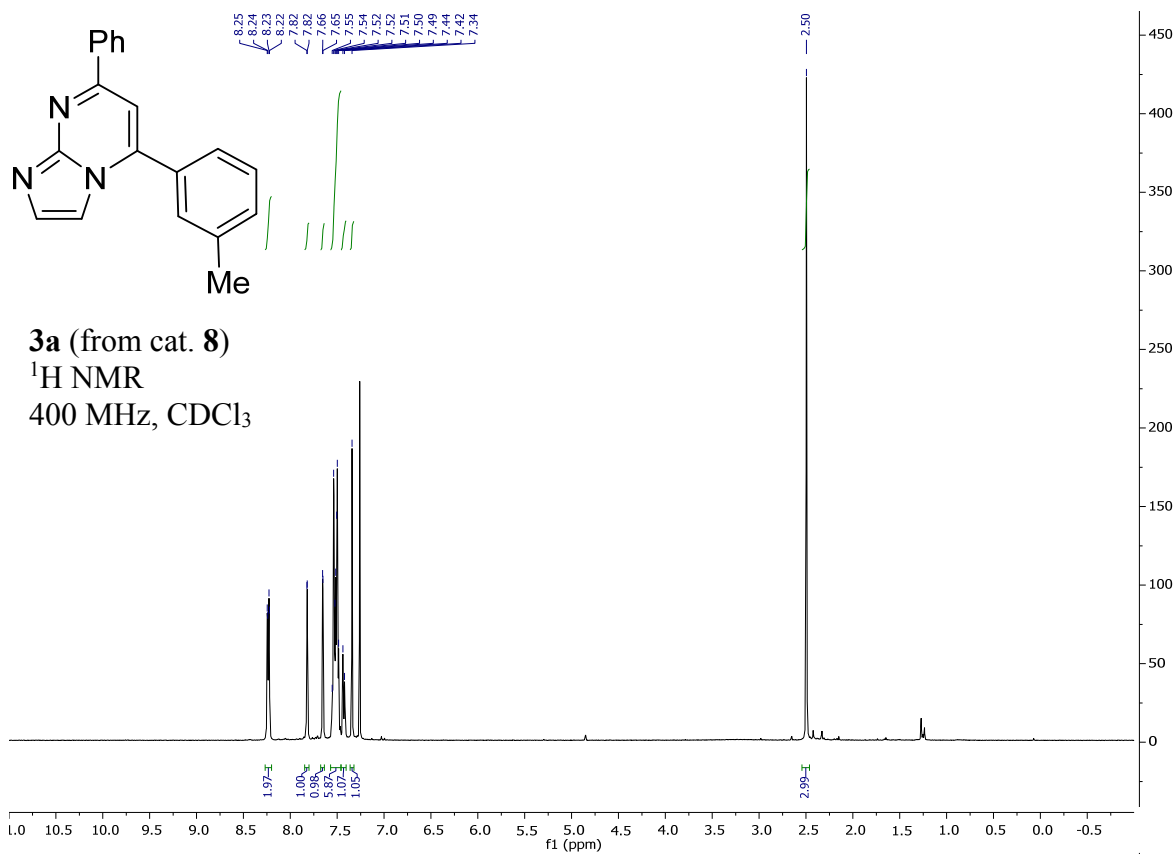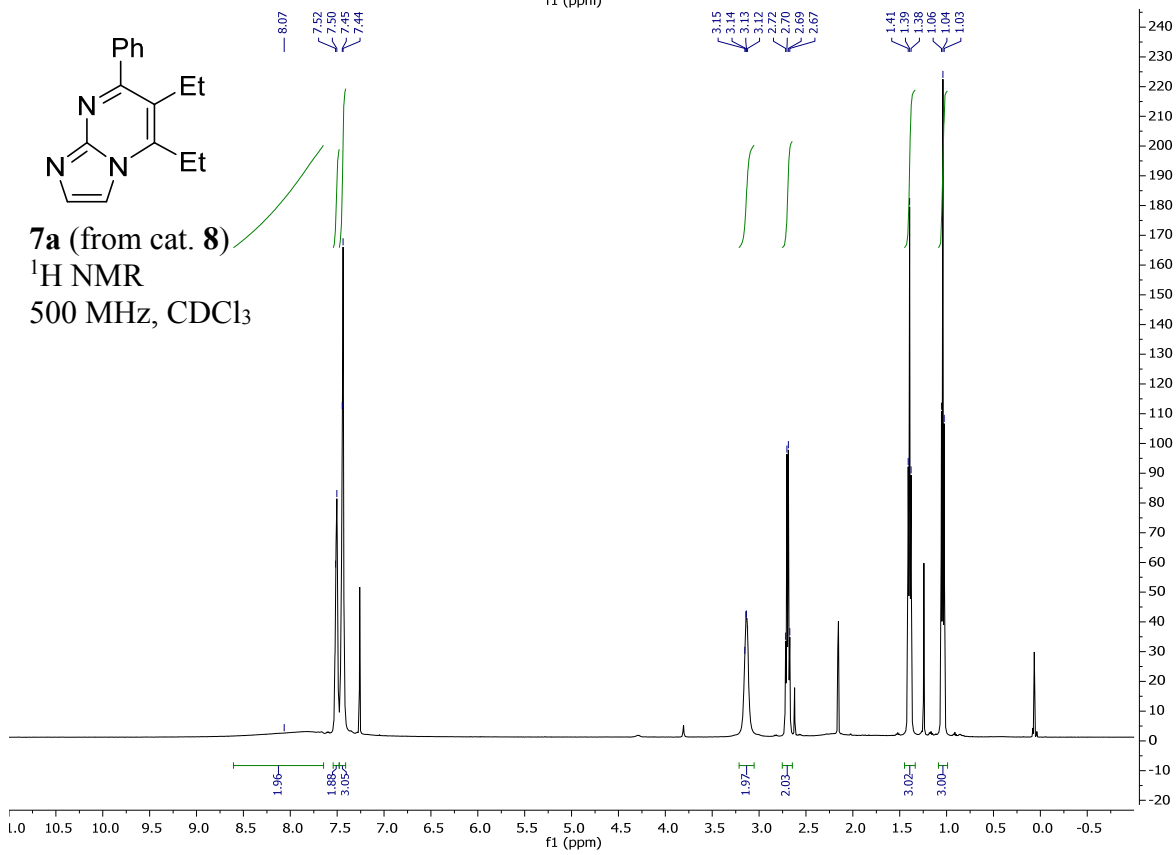

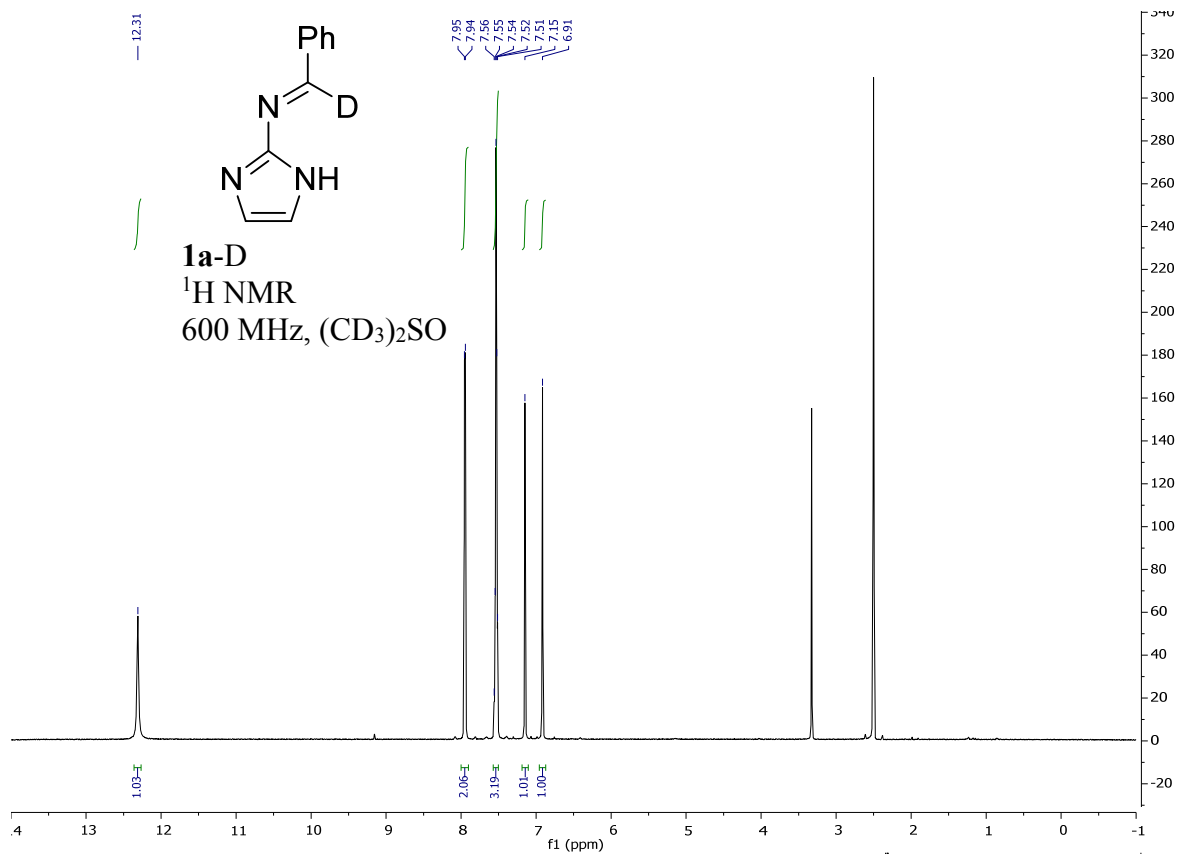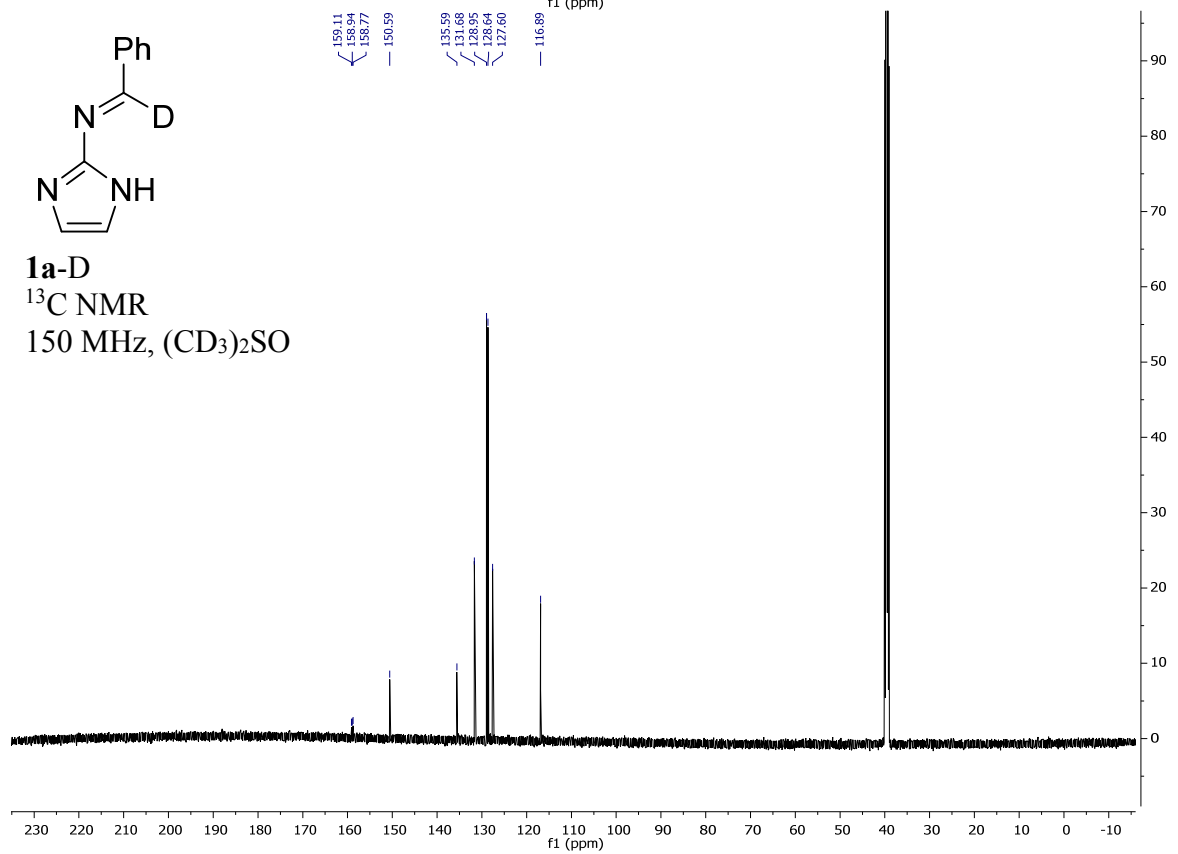

## 12. X-Ray Crystallography Information

### Product 3c

#### Crystal growth

Single crystals of **3c** were achieved by dissolving **3c** (~15 mg) in acetone (0.5 mL) and slow evaporation of the solvent over the course of three days.

#### Data Collection

Low-temperature diffraction data ( $\omega$ -scans) were collected on a Rigaku MicroMax-007HF diffractometer coupled to a Dectris Pilatus3R detector with Mo K $\alpha$  ( $\lambda = 0.71073 \text{ \AA}$ ) for the structure of 007C-17038. The diffraction images were processed and scaled using Rigaku Oxford Diffraction software (CrysAlisPro; Rigaku OD: The Woodlands, TX, 2015). The structure was solved with SHELXT and was refined against  $F^2$  on all data by full-matrix least squares with SHELXL (Sheldrick, G. M. *Acta Cryst.* 2008, A64, 112–122). All non-hydrogen atoms were refined anisotropically. Hydrogen atoms were included in the model at geometrically calculated positions and refined using a riding model. The isotropic displacement parameters of all hydrogen atoms were fixed to 1.2 times the U value of the atoms to which they are linked (1.5 times for methyl groups). The full numbering scheme of compound 007C-17038 can be found in the full details of the X-ray structure determination (CIF), which is included as Supporting Information. CCDC number 1585369 (007C-17038) contains the supplementary crystallographic data for this paper. These data can be obtained free of charge from The Cambridge Crystallographic Data Center via [www.ccdc.cam.ac.uk/data\\_request/cif](http://www.ccdc.cam.ac.uk/data_request/cif).

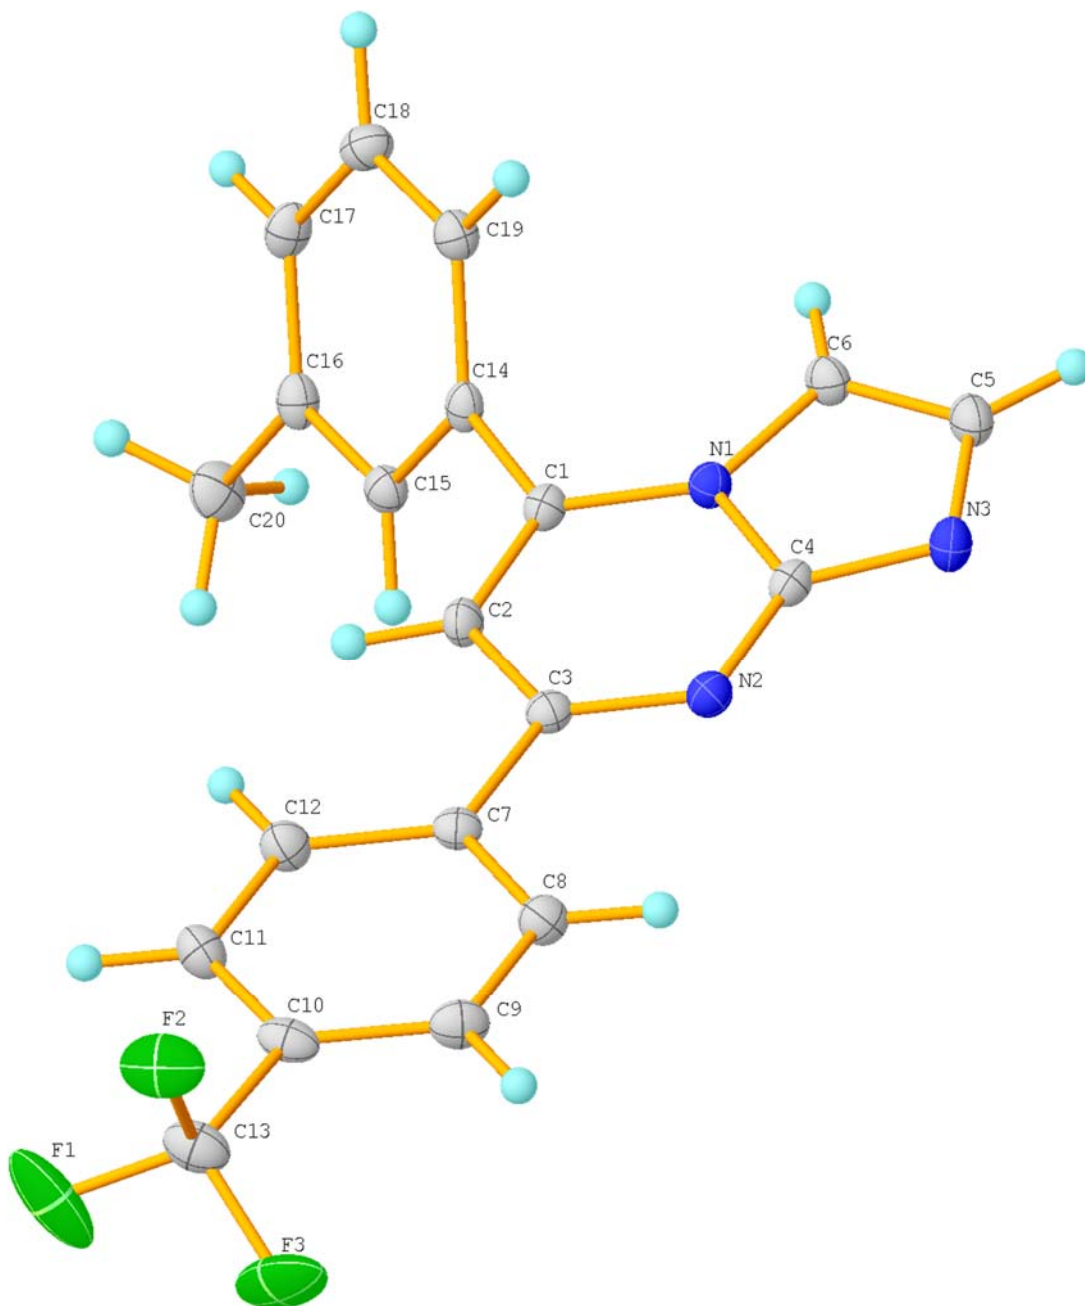

Figure S5. The complete numbering scheme of 007c-17038 with 50% thermal ellipsoid probability levels. The hydrogen atoms are shown as circles for clarity.

| Table S5. Crystal data and structure refinement for 007c-17038 |                                                               |
|----------------------------------------------------------------|---------------------------------------------------------------|
| Identification code                                            | 007c-17038                                                    |
| Empirical formula                                              | C <sub>20</sub> H <sub>14</sub> F <sub>3</sub> N <sub>3</sub> |
| Formula weight                                                 | 353.34                                                        |
| Temperature                                                    | 93(2) K                                                       |
| Wavelength                                                     | 0.71073 Å                                                     |
| Crystal system                                                 | Triclinic                                                     |
| Space group                                                    | P-1                                                           |

|                                      |                                       |                               |
|--------------------------------------|---------------------------------------|-------------------------------|
| Unit cell dimensions                 | a = 7.3317(3) Å                       | $\alpha = 95.002(3)^\circ$ .  |
|                                      | b = 10.9257(3) Å                      | $\beta = 104.723(3)^\circ$ .  |
|                                      | c = 11.0990(5) Å                      | $\gamma = 108.954(3)^\circ$ . |
| Volume                               | 799.13(5) Å <sup>3</sup>              |                               |
| Z                                    | 2                                     |                               |
| Density (calculated)                 | 1.468 Mg/m <sup>3</sup>               |                               |
| Absorption coefficient               | 0.113 mm <sup>-1</sup>                |                               |
| F(000)                               | 364                                   |                               |
| Crystal size                         | 0.100 x 0.050 x 0.050 mm <sup>3</sup> |                               |
| Crystal color and habit              | Colorless Plate                       |                               |
| Diffractometer                       | Dectris Pilatus 3R                    |                               |
| Theta range for data collection      | 3.010 to 27.479°.                     |                               |
| Index ranges                         | -9<=h<=9, -14<=k<=14, -13<=l<=14      |                               |
| Reflections collected                | 15659                                 |                               |
| Independent reflections              | 3667 [R(int) = 0.0238]                |                               |
| Observed reflections (I > 2sigma(I)) | 3188                                  |                               |
| Completeness to theta = 25.242°      | 99.9 %                                |                               |
| Absorption correction                | Semi-empirical from equivalents       |                               |
| Max. and min. transmission           | 1.00000 and 0.90130                   |                               |
| Solution method                      | SHELXT-2014/5 (Sheldrick, 2014)       |                               |
| Refinement method                    | SHELXL-2014/7 (Sheldrick, 2014)       |                               |
| Data / restraints / parameters       | 3667 / 0 / 236                        |                               |
| Goodness-of-fit on F <sup>2</sup>    | 1.050                                 |                               |
| Final R indices [I>2sigma(I)]        | R1 = 0.0376, wR2 = 0.1017             |                               |
| R indices (all data)                 | R1 = 0.0439, wR2 = 0.1053             |                               |
| Largest diff. peak and hole          | 0.341 and -0.295 e.Å <sup>-3</sup>    |                               |

Table S6. Atomic coordinates (x 10<sup>4</sup>) and equivalent isotropic displacement parameters (Å<sup>2</sup>x 10<sup>3</sup>) for 007c-17038. U(eq) is defined as one third of the trace of the orthogonalized U<sup>ij</sup> tensor.

|       | x        | y        | z       | U(eq) |
|-------|----------|----------|---------|-------|
| F(1)  | 176(1)   | 3976(1)  | 7961(1) | 50(1) |
| F(2)  | 2636(1)  | 5310(1)  | 9490(1) | 33(1) |
| F(3)  | 2782(2)  | 3483(1)  | 8754(1) | 42(1) |
| N(1)  | 8049(1)  | 8720(1)  | 3576(1) | 14(1) |
| N(2)  | 8029(2)  | 7396(1)  | 5207(1) | 15(1) |
| N(3)  | 10945(2) | 8447(1)  | 4554(1) | 18(1) |
| C(1)  | 6023(2)  | 8498(1)  | 3326(1) | 14(1) |
| C(2)  | 5032(2)  | 7740(1)  | 4041(1) | 15(1) |
| C(3)  | 6096(2)  | 7219(1)  | 5003(1) | 14(1) |
| C(4)  | 9008(2)  | 8133(1)  | 4490(1) | 14(1) |
| C(5)  | 11225(2) | 9246(1)  | 3680(1) | 18(1) |
| C(6)  | 9496(2)  | 9433(1)  | 3064(1) | 16(1) |
| C(7)  | 5047(2)  | 6471(1)  | 5844(1) | 14(1) |
| C(8)  | 6086(2)  | 5932(1)  | 6760(1) | 18(1) |
| C(9)  | 5155(2)  | 5266(1)  | 7578(1) | 19(1) |
| C(10) | 3166(2)  | 5126(1)  | 7485(1) | 18(1) |
| C(11) | 2107(2)  | 5649(1)  | 6577(1) | 20(1) |
| C(12) | 3047(2)  | 6316(1)  | 5763(1) | 18(1) |
| C(13) | 2189(2)  | 4470(1)  | 8409(1) | 23(1) |
| C(14) | 5034(2)  | 9086(1)  | 2320(1) | 14(1) |
| C(15) | 3381(2)  | 8252(1)  | 1321(1) | 16(1) |
| C(16) | 2302(2)  | 8762(1)  | 401(1)  | 17(1) |
| C(17) | 2902(2)  | 10124(1) | 517(1)  | 18(1) |

|       |         |          |         |       |
|-------|---------|----------|---------|-------|
| C(18) | 4552(2) | 10964(1) | 1507(1) | 18(1) |
| C(19) | 5639(2) | 10452(1) | 2410(1) | 16(1) |
| C(20) | 554(2)  | 7848(1)  | -692(1) | 23(1) |

Table S7. Bond lengths [Å] and angles [°] for 007c-17038.

|                |            |
|----------------|------------|
| F(1)-C(13)     | 1.3344(16) |
| F(2)-C(13)     | 1.3426(15) |
| F(3)-C(13)     | 1.3374(16) |
| N(1)-C(1)      | 1.3738(15) |
| N(1)-C(6)      | 1.3787(15) |
| N(1)-C(4)      | 1.4063(14) |
| N(2)-C(3)      | 1.3226(15) |
| N(2)-C(4)      | 1.3494(15) |
| N(3)-C(4)      | 1.3304(15) |
| N(3)-C(5)      | 1.3708(15) |
| C(1)-C(2)      | 1.3643(16) |
| C(1)-C(14)     | 1.4841(15) |
| C(2)-C(3)      | 1.4297(15) |
| C(2)-H(2)      | 0.9500     |
| C(3)-C(7)      | 1.4897(15) |
| C(5)-C(6)      | 1.3660(16) |
| C(5)-H(5)      | 0.9500     |
| C(6)-H(6)      | 0.9500     |
| C(7)-C(12)     | 1.3985(17) |
| C(7)-C(8)      | 1.4017(16) |
| C(8)-C(9)      | 1.3879(17) |
| C(8)-H(8)      | 0.9500     |
| C(9)-C(10)     | 1.3916(18) |
| C(9)-H(9)      | 0.9500     |
| C(10)-C(11)    | 1.3913(17) |
| C(10)-C(13)    | 1.4984(16) |
| C(11)-C(12)    | 1.3885(17) |
| C(11)-H(11)    | 0.9500     |
| C(12)-H(12)    | 0.9500     |
| C(14)-C(15)    | 1.3974(15) |
| C(14)-C(19)    | 1.3977(16) |
| C(15)-C(16)    | 1.3972(16) |
| C(15)-H(15)    | 0.9500     |
| C(16)-C(17)    | 1.3928(17) |
| C(16)-C(20)    | 1.5095(16) |
| C(17)-C(18)    | 1.3934(17) |
| C(17)-H(17)    | 0.9500     |
| C(18)-C(19)    | 1.3902(16) |
| C(18)-H(18)    | 0.9500     |
| C(19)-H(19)    | 0.9500     |
| C(20)-H(20A)   | 0.9800     |
| C(20)-H(20B)   | 0.9800     |
| C(20)-H(20C)   | 0.9800     |
| C(1)-N(1)-C(6) | 132.52(10) |
| C(1)-N(1)-C(4) | 120.66(10) |
| C(6)-N(1)-C(4) | 106.80(9)  |
| C(3)-N(2)-C(4) | 117.35(10) |
| C(4)-N(3)-C(5) | 104.81(10) |

|                   |            |
|-------------------|------------|
| C(2)-C(1)-N(1)    | 116.92(10) |
| C(2)-C(1)-C(14)   | 123.56(10) |
| N(1)-C(1)-C(14)   | 119.52(10) |
| C(1)-C(2)-C(3)    | 120.28(10) |
| C(1)-C(2)-H(2)    | 119.9      |
| C(3)-C(2)-H(2)    | 119.9      |
| N(2)-C(3)-C(2)    | 122.42(10) |
| N(2)-C(3)-C(7)    | 117.33(10) |
| C(2)-C(3)-C(7)    | 120.24(10) |
| N(3)-C(4)-N(2)    | 127.01(10) |
| N(3)-C(4)-N(1)    | 110.72(10) |
| N(2)-C(4)-N(1)    | 122.24(10) |
| C(6)-C(5)-N(3)    | 112.60(10) |
| C(6)-C(5)-H(5)    | 123.7      |
| N(3)-C(5)-H(5)    | 123.7      |
| C(5)-C(6)-N(1)    | 105.06(10) |
| C(5)-C(6)-H(6)    | 127.5      |
| N(1)-C(6)-H(6)    | 127.5      |
| C(12)-C(7)-C(8)   | 118.67(11) |
| C(12)-C(7)-C(3)   | 121.47(10) |
| C(8)-C(7)-C(3)    | 119.83(11) |
| C(9)-C(8)-C(7)    | 120.70(11) |
| C(9)-C(8)-H(8)    | 119.6      |
| C(7)-C(8)-H(8)    | 119.6      |
| C(8)-C(9)-C(10)   | 119.77(11) |
| C(8)-C(9)-H(9)    | 120.1      |
| C(10)-C(9)-H(9)   | 120.1      |
| C(11)-C(10)-C(9)  | 120.33(11) |
| C(11)-C(10)-C(13) | 119.65(12) |
| C(9)-C(10)-C(13)  | 119.95(11) |
| C(12)-C(11)-C(10) | 119.68(11) |
| C(12)-C(11)-H(11) | 120.2      |
| C(10)-C(11)-H(11) | 120.2      |
| C(11)-C(12)-C(7)  | 120.85(11) |
| C(11)-C(12)-H(12) | 119.6      |
| C(7)-C(12)-H(12)  | 119.6      |
| F(1)-C(13)-F(3)   | 106.98(11) |
| F(1)-C(13)-F(2)   | 105.87(11) |
| F(3)-C(13)-F(2)   | 105.66(10) |
| F(1)-C(13)-C(10)  | 112.84(11) |
| F(3)-C(13)-C(10)  | 112.96(11) |
| F(2)-C(13)-C(10)  | 111.99(10) |
| C(15)-C(14)-C(19) | 120.18(10) |
| C(15)-C(14)-C(1)  | 118.64(10) |
| C(19)-C(14)-C(1)  | 121.03(10) |
| C(16)-C(15)-C(14) | 120.91(11) |
| C(16)-C(15)-H(15) | 119.5      |
| C(14)-C(15)-H(15) | 119.5      |
| C(17)-C(16)-C(15) | 118.20(10) |
| C(17)-C(16)-C(20) | 121.42(10) |
| C(15)-C(16)-C(20) | 120.38(11) |
| C(16)-C(17)-C(18) | 121.27(10) |
| C(16)-C(17)-H(17) | 119.4      |
| C(18)-C(17)-H(17) | 119.4      |
| C(19)-C(18)-C(17) | 120.30(11) |
| C(19)-C(18)-H(18) | 119.8      |

|                     |            |
|---------------------|------------|
| C(17)-C(18)-H(18)   | 119.8      |
| C(18)-C(19)-C(14)   | 119.12(11) |
| C(18)-C(19)-H(19)   | 120.4      |
| C(14)-C(19)-H(19)   | 120.4      |
| C(16)-C(20)-H(20A)  | 109.5      |
| C(16)-C(20)-H(20B)  | 109.5      |
| H(20A)-C(20)-H(20B) | 109.5      |
| C(16)-C(20)-H(20C)  | 109.5      |
| H(20A)-C(20)-H(20C) | 109.5      |
| H(20B)-C(20)-H(20C) | 109.5      |

Symmetry transformations used to generate equivalent atoms:

Table S8. Anisotropic displacement parameters ( $\text{\AA}^2 \times 10^3$ ) for 007c-17038. The anisotropic displacement factor exponent takes the form:  $-2\pi^2 [ h^2 a^* U^{11} + \dots + 2 h k a^* b^* U^{12} ]$

|       | U <sup>11</sup> | U <sup>22</sup> | U <sup>33</sup> | U <sup>23</sup> | U <sup>13</sup> | U <sup>12</sup> |
|-------|-----------------|-----------------|-----------------|-----------------|-----------------|-----------------|
| F(1)  | 27(1)           | 72(1)           | 31(1)           | 21(1)           | 9(1)            | -10(1)          |
| F(2)  | 52(1)           | 29(1)           | 19(1)           | 4(1)            | 17(1)           | 11(1)           |
| F(3)  | 71(1)           | 27(1)           | 47(1)           | 23(1)           | 38(1)           | 22(1)           |
| N(1)  | 14(1)           | 15(1)           | 14(1)           | 3(1)            | 5(1)            | 6(1)            |
| N(2)  | 16(1)           | 15(1)           | 14(1)           | 3(1)            | 4(1)            | 7(1)            |
| N(3)  | 15(1)           | 22(1)           | 19(1)           | 4(1)            | 6(1)            | 9(1)            |
| C(1)  | 14(1)           | 16(1)           | 14(1)           | 2(1)            | 4(1)            | 6(1)            |
| C(2)  | 12(1)           | 17(1)           | 16(1)           | 4(1)            | 4(1)            | 6(1)            |
| C(3)  | 15(1)           | 13(1)           | 14(1)           | 2(1)            | 4(1)            | 5(1)            |
| C(4)  | 15(1)           | 16(1)           | 14(1)           | 2(1)            | 3(1)            | 8(1)            |
| C(5)  | 16(1)           | 19(1)           | 21(1)           | 3(1)            | 8(1)            | 6(1)            |
| C(6)  | 16(1)           | 18(1)           | 17(1)           | 4(1)            | 9(1)            | 6(1)            |
| C(7)  | 16(1)           | 12(1)           | 13(1)           | 1(1)            | 4(1)            | 4(1)            |
| C(8)  | 18(1)           | 18(1)           | 16(1)           | 4(1)            | 4(1)            | 7(1)            |
| C(9)  | 24(1)           | 18(1)           | 15(1)           | 5(1)            | 4(1)            | 7(1)            |
| C(10) | 24(1)           | 14(1)           | 14(1)           | 1(1)            | 6(1)            | 1(1)            |
| C(11) | 16(1)           | 21(1)           | 20(1)           | 4(1)            | 7(1)            | 4(1)            |
| C(12) | 18(1)           | 19(1)           | 17(1)           | 5(1)            | 5(1)            | 6(1)            |
| C(13) | 27(1)           | 20(1)           | 18(1)           | 4(1)            | 8(1)            | 3(1)            |
| C(14) | 13(1)           | 20(1)           | 14(1)           | 6(1)            | 7(1)            | 8(1)            |
| C(15) | 15(1)           | 17(1)           | 17(1)           | 4(1)            | 7(1)            | 6(1)            |
| C(16) | 14(1)           | 23(1)           | 15(1)           | 4(1)            | 5(1)            | 8(1)            |
| C(17) | 19(1)           | 24(1)           | 15(1)           | 8(1)            | 6(1)            | 12(1)           |
| C(18) | 22(1)           | 16(1)           | 19(1)           | 6(1)            | 8(1)            | 9(1)            |
| C(19) | 15(1)           | 18(1)           | 15(1)           | 4(1)            | 5(1)            | 6(1)            |
| C(20) | 19(1)           | 26(1)           | 20(1)           | 4(1)            | 1(1)            | 7(1)            |

Table S9. Hydrogen coordinates ( $\times 10^4$ ) and isotropic displacement parameters ( $\text{\AA}^2 \times 10^{-3}$ ) for 007c-17038.

|      | x     | y    | z    | U(eq) |
|------|-------|------|------|-------|
| H(2) | 3628  | 7556 | 3898 | 18    |
| H(5) | 12482 | 9629 | 3519 | 22    |
| H(6) | 9327  | 9944 | 2423 | 20    |
| H(8) | 7442  | 6023 | 6823 | 21    |



|        |      |       |       |    |
|--------|------|-------|-------|----|
| H(9)   | 5873 | 4907  | 8199  | 23 |
| H(11)  | 748  | 5549  | 6514  | 23 |
| H(12)  | 2322 | 6673  | 5143  | 22 |
| H(15)  | 2986 | 7325  | 1266  | 19 |
| H(17)  | 2171 | 10489 | -91   | 22 |
| H(18)  | 4937 | 11891 | 1566  | 22 |
| H(19)  | 6778 | 11022 | 3078  | 20 |
| H(20A) | 1021 | 7742  | -1434 | 34 |
| H(20B) | -510 | 8222  | -896  | 34 |
| H(20C) | 17   | 6989  | -458  | 34 |

Table S10. Torsion angles [°] for 007c-17038.

|                         |             |
|-------------------------|-------------|
| C(6)-N(1)-C(1)-C(2)     | -179.11(11) |
| C(4)-N(1)-C(1)-C(2)     | 2.84(16)    |
| C(6)-N(1)-C(1)-C(14)    | 0.45(18)    |
| C(4)-N(1)-C(1)-C(14)    | -177.60(9)  |
| N(1)-C(1)-C(2)-C(3)     | 0.29(16)    |
| C(14)-C(1)-C(2)-C(3)    | -179.25(10) |
| C(4)-N(2)-C(3)-C(2)     | 2.05(16)    |
| C(4)-N(2)-C(3)-C(7)     | -176.58(9)  |
| C(1)-C(2)-C(3)-N(2)     | -2.89(17)   |
| C(1)-C(2)-C(3)-C(7)     | 175.70(10)  |
| C(5)-N(3)-C(4)-N(2)     | -177.49(11) |
| C(5)-N(3)-C(4)-N(1)     | 0.47(13)    |
| C(3)-N(2)-C(4)-N(3)     | 178.96(11)  |
| C(3)-N(2)-C(4)-N(1)     | 1.20(16)    |
| C(1)-N(1)-C(4)-N(3)     | 178.14(10)  |
| C(6)-N(1)-C(4)-N(3)     | -0.37(13)   |
| C(1)-N(1)-C(4)-N(2)     | -3.78(16)   |
| C(6)-N(1)-C(4)-N(2)     | 177.71(10)  |
| C(4)-N(3)-C(5)-C(6)     | -0.42(13)   |
| N(3)-C(5)-C(6)-N(1)     | 0.20(13)    |
| C(1)-N(1)-C(6)-C(5)     | -178.16(11) |
| C(4)-N(1)-C(6)-C(5)     | 0.09(12)    |
| N(2)-C(3)-C(7)-C(12)    | 175.25(10)  |
| C(2)-C(3)-C(7)-C(12)    | -3.41(16)   |
| N(2)-C(3)-C(7)-C(8)     | -3.19(15)   |
| C(2)-C(3)-C(7)-C(8)     | 178.15(10)  |
| C(12)-C(7)-C(8)-C(9)    | -0.48(17)   |
| C(3)-C(7)-C(8)-C(9)     | 178.01(10)  |
| C(7)-C(8)-C(9)-C(10)    | 0.27(18)    |
| C(8)-C(9)-C(10)-C(11)   | 0.08(18)    |
| C(8)-C(9)-C(10)-C(13)   | -176.84(11) |
| C(9)-C(10)-C(11)-C(12)  | -0.22(18)   |
| C(13)-C(10)-C(11)-C(12) | 176.71(11)  |
| C(10)-C(11)-C(12)-C(7)  | 0.01(18)    |
| C(8)-C(7)-C(12)-C(11)   | 0.33(17)    |
| C(3)-C(7)-C(12)-C(11)   | -178.12(10) |
| C(11)-C(10)-C(13)-F(1)  | 26.20(17)   |
| C(9)-C(10)-C(13)-F(1)   | -156.86(12) |
| C(11)-C(10)-C(13)-F(3)  | 147.69(12)  |
| C(9)-C(10)-C(13)-F(3)   | -35.37(16)  |
| C(11)-C(10)-C(13)-F(2)  | -93.15(14)  |
| C(9)-C(10)-C(13)-F(2)   | 83.79(14)   |

|                         |             |
|-------------------------|-------------|
| C(2)-C(1)-C(14)-C(15)   | -57.84(15)  |
| N(1)-C(1)-C(14)-C(15)   | 122.63(12)  |
| C(2)-C(1)-C(14)-C(19)   | 117.65(13)  |
| N(1)-C(1)-C(14)-C(19)   | -61.88(15)  |
| C(19)-C(14)-C(15)-C(16) | -0.35(17)   |
| C(1)-C(14)-C(15)-C(16)  | 175.18(10)  |
| C(14)-C(15)-C(16)-C(17) | -0.81(17)   |
| C(14)-C(15)-C(16)-C(20) | 178.37(11)  |
| C(15)-C(16)-C(17)-C(18) | 1.07(17)    |
| C(20)-C(16)-C(17)-C(18) | -178.10(11) |
| C(16)-C(17)-C(18)-C(19) | -0.17(18)   |
| C(17)-C(18)-C(19)-C(14) | -1.00(17)   |
| C(15)-C(14)-C(19)-C(18) | 1.26(17)    |
| C(1)-C(14)-C(19)-C(18)  | -174.16(10) |

---

Symmetry transformations used to generate equivalent atoms:

## Product 7a

### Crystal growth

Single crystals of **7a** were achieved by dissolving **7a** (~15 mg) in acetone (0.5 mL) and slow evaporation of the solvent over the course of three days.

### Data Collection

Low-temperature diffraction data ( $\omega$ -scans) were collected on a Rigaku MicroMax-007HF diffractometer coupled to a Saturn994+ CCD detector with Cu K $\alpha$  ( $\lambda = 1.54178 \text{ \AA}$ ) for the structure of 007-16124. The diffraction images were processed and scaled using the Rigaku CrystalClear software (CrystalClear and CrystalStructure; Rigaku/MS: The Woodlands, TX, 2005). The structure was solved with SHELXT and was refined against  $F^2$  on all data by full-matrix least squares with SHELXL (Sheldrick, G. M. Acta Cryst. 2008, A64, 112–122). All non-hydrogen atoms were refined anisotropically. Hydrogen atoms were included in the model at geometrically calculated positions and refined using a riding model. The isotropic displacement parameters of all hydrogen atoms were fixed to 1.2 times the U value of the atoms to which they are linked (1.5 times for methyl groups). The full numbering scheme of compound 007-16124 can be found in the full details of the X-ray structure determination (CIF), which is included as Supporting Information. CCDC number 1585370 (007-16124) contains the supplementary crystallographic data for this paper. These data can be obtained free of charge from The Cambridge Crystallographic Data Center via [www.ccdc.cam.ac.uk/data\\_request/cif](http://www.ccdc.cam.ac.uk/data_request/cif).

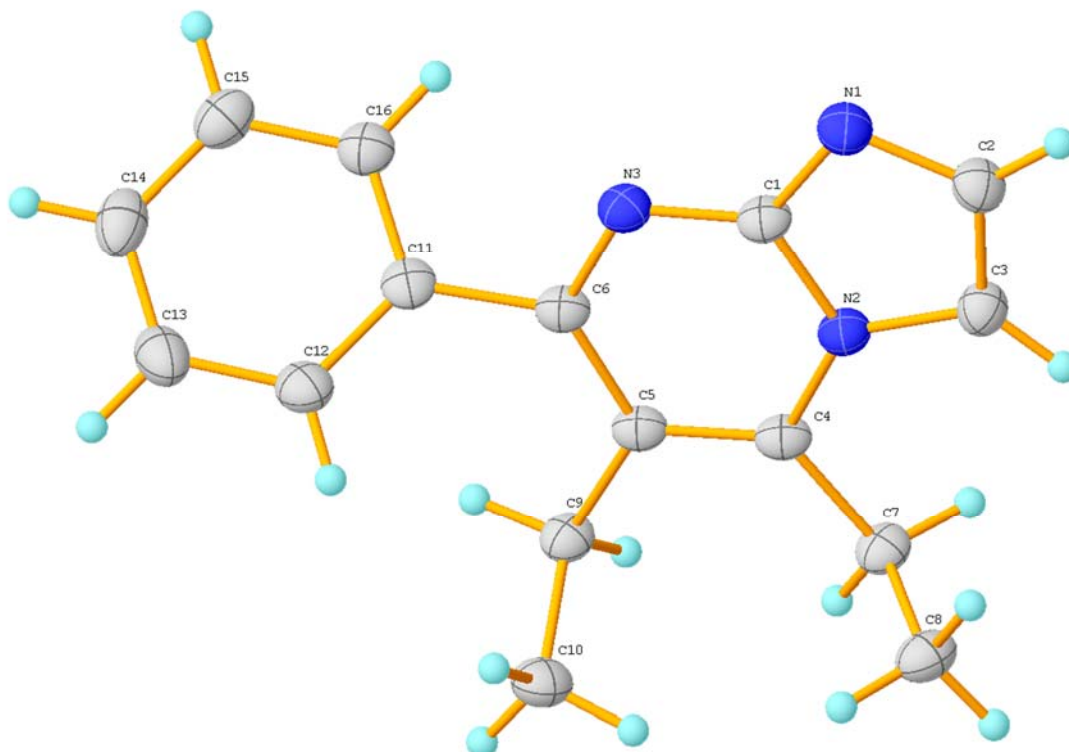

Figure S6. The complete numbering scheme 007-16124 with 50% thermal ellipsoid probability levels. The hydrogen atoms are shown as circles for clarity.

Table S11. Crystal data and structure refinement for 007-16124.

|                                   |                                                |                              |
|-----------------------------------|------------------------------------------------|------------------------------|
| Identification code               | 007-16124                                      |                              |
| Empirical formula                 | C <sub>32</sub> H <sub>34</sub> N <sub>6</sub> |                              |
| Formula weight                    | 502.65                                         |                              |
| Temperature                       | 93(2) K                                        |                              |
| Wavelength                        | 1.54178 Å                                      |                              |
| Crystal system                    | Monoclinic                                     |                              |
| Space group                       | C2/c                                           |                              |
| Unit cell dimensions              | a = 29.205(2) Å                                | $\alpha = 90^\circ$ .        |
|                                   | b = 6.7028(5) Å                                | $\beta = 101.591(3)^\circ$ . |
|                                   | c = 13.6630(10) Å                              | $\gamma = 90^\circ$ .        |
| Volume                            | 2620.1(3) Å <sup>3</sup>                       |                              |
| Z                                 | 4                                              |                              |
| Density (calculated)              | 1.274 Mg/m <sup>3</sup>                        |                              |
| Absorption coefficient            | 0.601 mm <sup>-1</sup>                         |                              |
| F(000)                            | 1072                                           |                              |
| Crystal size                      | 0.200 x 0.020 x 0.020 mm <sup>3</sup>          |                              |
| Theta range for data collection   | 6.187 to 67.766°.                              |                              |
| Index ranges                      | -34<=h<=34, -8<=k<=8, -16<=l<=16               |                              |
| Reflections collected             | 44198                                          |                              |
| Independent reflections           | 2364 [R(int) = 0.0678]                         |                              |
| Completeness to theta = 67.679°   | 99.8 %                                         |                              |
| Absorption correction             | Semi-empirical from equivalents                |                              |
| Max. and min. transmission        | 1.000 and 0.777                                |                              |
| Refinement method                 | Full-matrix least-squares on F <sup>2</sup>    |                              |
| Data / restraints / parameters    | 2364 / 0 / 174                                 |                              |
| Goodness-of-fit on F <sup>2</sup> | 1.033                                          |                              |
| Final R indices [I>2sigma(I)]     | R1 = 0.0326, wR2 = 0.0867                      |                              |
| R indices (all data)              | R1 = 0.0366, wR2 = 0.0896                      |                              |
| Extinction coefficient            | n/a                                            |                              |
| Largest diff. peak and hole       | 0.199 and -0.144 e.Å <sup>-3</sup>             |                              |

Table S12. Atomic coordinates (x 10<sup>4</sup>) and equivalent isotropic displacement parameters (Å<sup>2</sup> x 10<sup>3</sup>) for 007-16124. U(eq) is defined as one third of the trace of the orthogonalized U<sup>ij</sup> tensor.

|       | x       | y        | z       | U(eq) |
|-------|---------|----------|---------|-------|
| N(1)  | 7108(1) | 6440(2)  | 5738(1) | 27(1) |
| N(2)  | 6915(1) | 6847(1)  | 7240(1) | 23(1) |
| N(3)  | 6515(1) | 4335(1)  | 6152(1) | 24(1) |
| C(1)  | 6833(1) | 5800(2)  | 6338(1) | 24(1) |
| C(2)  | 7370(1) | 7923(2)  | 6265(1) | 28(1) |
| C(3)  | 7263(1) | 8210(2)  | 7184(1) | 27(1) |
| C(4)  | 6677(1) | 6395(2)  | 7990(1) | 23(1) |
| C(5)  | 6345(1) | 4915(2)  | 7803(1) | 22(1) |
| C(6)  | 6274(1) | 3908(2)  | 6852(1) | 23(1) |
| C(7)  | 6816(1) | 7580(2)  | 8935(1) | 26(1) |
| C(8)  | 6620(1) | 9708(2)  | 8833(1) | 31(1) |
| C(9)  | 6084(1) | 4304(2)  | 8609(1) | 25(1) |
| C(10) | 5700(1) | 5751(2)  | 8765(1) | 32(1) |
| C(11) | 5943(1) | 2211(2)  | 6581(1) | 25(1) |
| C(12) | 5476(1) | 2281(2)  | 6674(1) | 31(1) |
| C(13) | 5184(1) | 661(2)   | 6394(1) | 37(1) |
| C(14) | 5353(1) | -1053(2) | 6026(1) | 36(1) |
| C(15) | 5814(1) | -1128(2) | 5915(1) | 32(1) |

C(16) 6106(1) 492(2) 6185(1) 27(1)

Table S13. Bond lengths [Å] and angles [°] for 007-16124.

|                |            |
|----------------|------------|
| N(1)-C(1)      | 1.3290(14) |
| N(1)-C(2)      | 1.3681(15) |
| N(2)-C(3)      | 1.3801(15) |
| N(2)-C(4)      | 1.3820(14) |
| N(2)-C(1)      | 1.3959(14) |
| N(3)-C(6)      | 1.3275(14) |
| N(3)-C(1)      | 1.3395(15) |
| C(2)-C(3)      | 1.3689(16) |
| C(2)-H(2)      | 0.9500     |
| C(3)-H(3)      | 0.9500     |
| C(4)-C(5)      | 1.3743(16) |
| C(4)-C(7)      | 1.5008(15) |
| C(5)-C(6)      | 1.4412(15) |
| C(5)-C(9)      | 1.5170(14) |
| C(6)-C(11)     | 1.4901(16) |
| C(7)-C(8)      | 1.5321(17) |
| C(7)-H(7A)     | 0.9900     |
| C(7)-H(7B)     | 0.9900     |
| C(8)-H(8A)     | 0.9800     |
| C(8)-H(8B)     | 0.9800     |
| C(8)-H(8C)     | 0.9800     |
| C(9)-C(10)     | 1.5310(16) |
| C(9)-H(9A)     | 0.9900     |
| C(9)-H(9B)     | 0.9900     |
| C(10)-H(10A)   | 0.9800     |
| C(10)-H(10B)   | 0.9800     |
| C(10)-H(10C)   | 0.9800     |
| C(11)-C(12)    | 1.3963(16) |
| C(11)-C(16)    | 1.3967(16) |
| C(12)-C(13)    | 1.3860(18) |
| C(12)-H(12)    | 0.9500     |
| C(13)-C(14)    | 1.384(2)   |
| C(13)-H(13)    | 0.9500     |
| C(14)-C(15)    | 1.3848(18) |
| C(14)-H(14)    | 0.9500     |
| C(15)-C(16)    | 1.3849(17) |
| C(15)-H(15)    | 0.9500     |
| C(16)-H(16)    | 0.9500     |
| C(1)-N(1)-C(2) | 104.73(9)  |
| C(3)-N(2)-C(4) | 132.15(10) |
| C(3)-N(2)-C(1) | 106.40(9)  |
| C(4)-N(2)-C(1) | 121.41(10) |
| C(6)-N(3)-C(1) | 117.92(9)  |
| N(1)-C(1)-N(3) | 126.90(10) |
| N(1)-C(1)-N(2) | 111.37(10) |
| N(3)-C(1)-N(2) | 121.73(10) |
| N(1)-C(2)-C(3) | 112.18(10) |
| N(1)-C(2)-H(2) | 123.9      |
| C(3)-C(2)-H(2) | 123.9      |
| C(2)-C(3)-N(2) | 105.32(10) |
| C(2)-C(3)-H(3) | 127.3      |

|                     |            |
|---------------------|------------|
| N(2)-C(3)-H(3)      | 127.3      |
| C(5)-C(4)-N(2)      | 117.43(10) |
| C(5)-C(4)-C(7)      | 126.91(10) |
| N(2)-C(4)-C(7)      | 115.66(10) |
| C(4)-C(5)-C(6)      | 118.33(10) |
| C(4)-C(5)-C(9)      | 119.88(10) |
| C(6)-C(5)-C(9)      | 121.71(10) |
| N(3)-C(6)-C(5)      | 123.15(10) |
| N(3)-C(6)-C(11)     | 113.37(9)  |
| C(5)-C(6)-C(11)     | 123.39(10) |
| C(4)-C(7)-C(8)      | 112.53(9)  |
| C(4)-C(7)-H(7A)     | 109.1      |
| C(8)-C(7)-H(7A)     | 109.1      |
| C(4)-C(7)-H(7B)     | 109.1      |
| C(8)-C(7)-H(7B)     | 109.1      |
| H(7A)-C(7)-H(7B)    | 107.8      |
| C(7)-C(8)-H(8A)     | 109.5      |
| C(7)-C(8)-H(8B)     | 109.5      |
| H(8A)-C(8)-H(8B)    | 109.5      |
| C(7)-C(8)-H(8C)     | 109.5      |
| H(8A)-C(8)-H(8C)    | 109.5      |
| H(8B)-C(8)-H(8C)    | 109.5      |
| C(5)-C(9)-C(10)     | 114.83(9)  |
| C(5)-C(9)-H(9A)     | 108.6      |
| C(10)-C(9)-H(9A)    | 108.6      |
| C(5)-C(9)-H(9B)     | 108.6      |
| C(10)-C(9)-H(9B)    | 108.6      |
| H(9A)-C(9)-H(9B)    | 107.5      |
| C(9)-C(10)-H(10A)   | 109.5      |
| C(9)-C(10)-H(10B)   | 109.5      |
| H(10A)-C(10)-H(10B) | 109.5      |
| C(9)-C(10)-H(10C)   | 109.5      |
| H(10A)-C(10)-H(10C) | 109.5      |
| H(10B)-C(10)-H(10C) | 109.5      |
| C(12)-C(11)-C(16)   | 118.55(11) |
| C(12)-C(11)-C(6)    | 123.25(11) |
| C(16)-C(11)-C(6)    | 118.16(10) |
| C(13)-C(12)-C(11)   | 120.44(12) |
| C(13)-C(12)-H(12)   | 119.8      |
| C(11)-C(12)-H(12)   | 119.8      |
| C(14)-C(13)-C(12)   | 120.44(11) |
| C(14)-C(13)-H(13)   | 119.8      |
| C(12)-C(13)-H(13)   | 119.8      |
| C(13)-C(14)-C(15)   | 119.63(12) |
| C(13)-C(14)-H(14)   | 120.2      |
| C(15)-C(14)-H(14)   | 120.2      |
| C(14)-C(15)-C(16)   | 120.23(12) |
| C(14)-C(15)-H(15)   | 119.9      |
| C(16)-C(15)-H(15)   | 119.9      |
| C(15)-C(16)-C(11)   | 120.68(11) |
| C(15)-C(16)-H(16)   | 119.7      |
| C(11)-C(16)-H(16)   | 119.7      |

---

Symmetry transformations used to generate equivalent atoms:

Table S14. Anisotropic displacement parameters ( $\text{\AA}^2 \times 10^3$ ) for 007-16124. The anisotropic

displacement factor exponent takes the form:  $-2\pi^2[ h^2 a^{*2}U^{11} + \dots + 2 h k a^* b^* U^{12} ]$

|       | U <sup>11</sup> | U <sup>22</sup> | U <sup>33</sup> | U <sup>23</sup> | U <sup>13</sup> | U <sup>12</sup> |
|-------|-----------------|-----------------|-----------------|-----------------|-----------------|-----------------|
| N(1)  | 31(1)           | 32(1)           | 21(1)           | 1(1)            | 8(1)            | -2(1)           |
| N(2)  | 26(1)           | 26(1)           | 17(1)           | 0(1)            | 4(1)            | 1(1)            |
| N(3)  | 28(1)           | 28(1)           | 17(1)           | 0(1)            | 5(1)            | 0(1)            |
| C(1)  | 27(1)           | 27(1)           | 16(1)           | 1(1)            | 4(1)            | 2(1)            |
| C(2)  | 29(1)           | 30(1)           | 25(1)           | 2(1)            | 7(1)            | -3(1)           |
| C(3)  | 28(1)           | 28(1)           | 24(1)           | -1(1)           | 4(1)            | -3(1)           |
| C(4)  | 27(1)           | 25(1)           | 17(1)           | 2(1)            | 5(1)            | 5(1)            |
| C(5)  | 26(1)           | 25(1)           | 17(1)           | 2(1)            | 4(1)            | 5(1)            |
| C(6)  | 25(1)           | 25(1)           | 18(1)           | 2(1)            | 4(1)            | 4(1)            |
| C(7)  | 32(1)           | 29(1)           | 17(1)           | -1(1)           | 4(1)            | -1(1)           |
| C(8)  | 42(1)           | 29(1)           | 24(1)           | -3(1)           | 9(1)            | 0(1)            |
| C(9)  | 31(1)           | 27(1)           | 18(1)           | 1(1)            | 6(1)            | -1(1)           |
| C(10) | 35(1)           | 35(1)           | 27(1)           | -2(1)           | 13(1)           | 2(1)            |
| C(11) | 29(1)           | 30(1)           | 15(1)           | 2(1)            | 4(1)            | 0(1)            |
| C(12) | 31(1)           | 40(1)           | 22(1)           | -4(1)           | 7(1)            | 0(1)            |
| C(13) | 31(1)           | 53(1)           | 28(1)           | -6(1)           | 8(1)            | -9(1)           |
| C(14) | 42(1)           | 40(1)           | 25(1)           | -1(1)           | 4(1)            | -15(1)          |
| C(15) | 42(1)           | 29(1)           | 25(1)           | -1(1)           | 3(1)            | -1(1)           |
| C(16) | 30(1)           | 31(1)           | 20(1)           | 2(1)            | 4(1)            | 1(1)            |

Table S15. Hydrogen coordinates ( x 10<sup>4</sup>) and isotropic displacement parameters (Å<sup>2</sup>x 10<sup>-3</sup>) for 007-16124.

|        | x    | y     | z    | U(eq) |
|--------|------|-------|------|-------|
| H(2)   | 7600 | 8666  | 6020 | 33    |
| H(3)   | 7399 | 9149  | 7679 | 32    |
| H(7A)  | 7161 | 7642  | 9120 | 31    |
| H(7B)  | 6702 | 6891  | 9481 | 31    |
| H(8A)  | 6727 | 10390 | 8285 | 47    |
| H(8B)  | 6730 | 10436 | 9458 | 47    |
| H(8C)  | 6277 | 9657  | 8690 | 47    |
| H(9A)  | 6312 | 4167  | 9248 | 30    |
| H(9B)  | 5942 | 2976  | 8437 | 30    |
| H(10A) | 5493 | 6029  | 8121 | 47    |
| H(10B) | 5841 | 6998  | 9053 | 47    |
| H(10C) | 5518 | 5151  | 9220 | 47    |
| H(12)  | 5357 | 3447  | 6931 | 37    |
| H(13)  | 4866 | 728   | 6456 | 44    |
| H(14)  | 5154 | -2172 | 5849 | 43    |
| H(15)  | 5929 | -2294 | 5653 | 39    |
| H(16)  | 6421 | 433   | 6100 | 33    |

Table S16. Torsion angles [°] for 007-16124.

|                     |             |
|---------------------|-------------|
| C(2)-N(1)-C(1)-N(3) | -179.31(11) |
| C(2)-N(1)-C(1)-N(2) | -0.02(12)   |
| C(6)-N(3)-C(1)-N(1) | 179.77(11)  |
| C(6)-N(3)-C(1)-N(2) | 0.55(16)    |

|                         |             |
|-------------------------|-------------|
| C(3)-N(2)-C(1)-N(1)     | -0.08(12)   |
| C(4)-N(2)-C(1)-N(1)     | -178.20(10) |
| C(3)-N(2)-C(1)-N(3)     | 179.26(10)  |
| C(4)-N(2)-C(1)-N(3)     | 1.14(16)    |
| C(1)-N(1)-C(2)-C(3)     | 0.11(13)    |
| N(1)-C(2)-C(3)-N(2)     | -0.16(13)   |
| C(4)-N(2)-C(3)-C(2)     | 177.97(11)  |
| C(1)-N(2)-C(3)-C(2)     | 0.14(12)    |
| C(3)-N(2)-C(4)-C(5)     | -179.59(11) |
| C(1)-N(2)-C(4)-C(5)     | -2.02(15)   |
| C(3)-N(2)-C(4)-C(7)     | -0.14(17)   |
| C(1)-N(2)-C(4)-C(7)     | 177.43(9)   |
| N(2)-C(4)-C(5)-C(6)     | 1.29(15)    |
| C(7)-C(4)-C(5)-C(6)     | -178.10(10) |
| N(2)-C(4)-C(5)-C(9)     | 177.98(9)   |
| C(7)-C(4)-C(5)-C(9)     | -1.40(17)   |
| C(1)-N(3)-C(6)-C(5)     | -1.28(16)   |
| C(1)-N(3)-C(6)-C(11)    | -177.97(9)  |
| C(4)-C(5)-C(6)-N(3)     | 0.36(16)    |
| C(9)-C(5)-C(6)-N(3)     | -176.27(10) |
| C(4)-C(5)-C(6)-C(11)    | 176.71(10)  |
| C(9)-C(5)-C(6)-C(11)    | 0.08(16)    |
| C(5)-C(4)-C(7)-C(8)     | -104.76(13) |
| N(2)-C(4)-C(7)-C(8)     | 75.85(12)   |
| C(4)-C(5)-C(9)-C(10)    | 76.58(13)   |
| C(6)-C(5)-C(9)-C(10)    | -106.85(12) |
| N(3)-C(6)-C(11)-C(12)   | -131.62(11) |
| C(5)-C(6)-C(11)-C(12)   | 51.71(16)   |
| N(3)-C(6)-C(11)-C(16)   | 46.28(14)   |
| C(5)-C(6)-C(11)-C(16)   | -130.40(11) |
| C(16)-C(11)-C(12)-C(13) | 1.11(17)    |
| C(6)-C(11)-C(12)-C(13)  | 179.00(11)  |
| C(11)-C(12)-C(13)-C(14) | 0.47(19)    |
| C(12)-C(13)-C(14)-C(15) | -1.51(19)   |
| C(13)-C(14)-C(15)-C(16) | 0.94(18)    |
| C(14)-C(15)-C(16)-C(11) | 0.66(17)    |
| C(12)-C(11)-C(16)-C(15) | -1.68(16)   |
| C(6)-C(11)-C(16)-C(15)  | -179.67(10) |

---

Symmetry transformations used to generate equivalent atoms:



## Rhodacycle 8

### Crystal growth

Single crystals of **8** were achieved by recrystallization in tetrahydrofuran.

### Data Collection

Low-temperature diffraction data ( $\omega$ -scans) were collected on a Rigaku MicroMax-007HF diffractometer coupled to a Saturn994+ CCD detector with Cu K $\alpha$  ( $\lambda = 1.54178 \text{ \AA}$ ) for the structure of 007b-17101. The diffraction images were processed and scaled using Rigaku Oxford Diffraction software (CrysAlisPro; Rigaku OD: The Woodlands, TX, 2015). The structure was solved with SHELXT and was refined against  $F^2$  on all data by full-matrix least squares with SHELXL (Sheldrick, G. M. *Acta Cryst.* 2008, A64, 112–122). All non-hydrogen atoms were refined anisotropically. Hydrogen atoms were included in the model at geometrically calculated positions and refined using a riding model. The isotropic displacement parameters of all hydrogen atoms were fixed to 1.2 times the U value of the atoms to which they are linked (1.5 times for methyl groups). The THF molecule is disordered across crystallographic glide plane. The special position constraints were suppressed and the THF model extends past the asymmetric unit with all atoms at half occupancy. The full numbering scheme of compound 007b-17101 can be found in the full details of the X-ray structure determination (CIF), which is included as Supporting Information. CCDC number 1585355 (007b-17101) contains the supplementary crystallographic data for this paper. These data can be obtained free of charge from The Cambridge Crystallographic Data Center via [www.ccdc.cam.ac.uk/data\\_request/cif](http://www.ccdc.cam.ac.uk/data_request/cif).

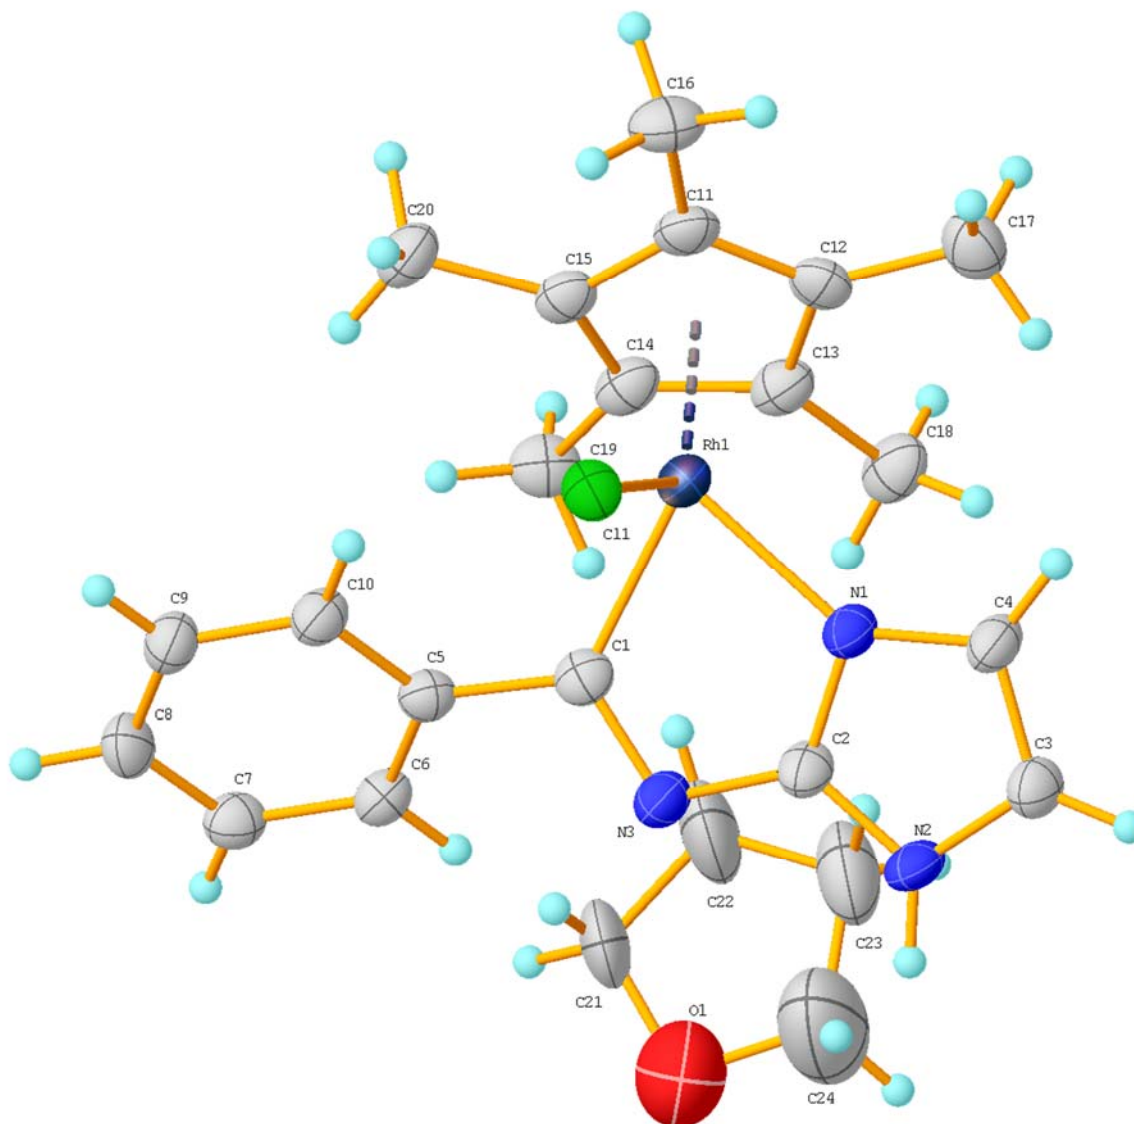

Figure S7. The complete numbering scheme of 007b-17101 with 50% thermal ellipsoid probability levels. The hydrogen atoms are shown as circles for clarity.

Table S17. Crystal data and structure refinement for 007b-17101.

|                      |                                                                        |                             |
|----------------------|------------------------------------------------------------------------|-----------------------------|
| Identification code  | 007b-17101                                                             |                             |
| Empirical formula    | C <sub>22</sub> H <sub>27</sub> Cl N <sub>3</sub> O <sub>0.50</sub> Rh |                             |
| Formula weight       | 479.82                                                                 |                             |
| Temperature          | 93(2) K                                                                |                             |
| Wavelength           | 1.54184 Å                                                              |                             |
| Crystal system       | Monoclinic                                                             |                             |
| Space group          | C2/c                                                                   |                             |
| Unit cell dimensions | a = 29.4841(9) Å                                                       | $\alpha = 90^\circ$ .       |
|                      | b = 9.3563(2) Å                                                        | $\beta = 91.787(3)^\circ$ . |
|                      | c = 14.9795(5) Å                                                       | $\gamma = 90^\circ$ .       |
| Volume               | 4130.3(2) Å <sup>3</sup>                                               |                             |
| Z                    | 8                                                                      |                             |
| Density (calculated) | 1.543 Mg/m <sup>3</sup>                                                |                             |

|                                      |                                       |
|--------------------------------------|---------------------------------------|
| Absorption coefficient               | 7.981 mm <sup>-1</sup>                |
| F(000)                               | 1968                                  |
| Crystal size                         | 0.100 x 0.050 x 0.010 mm <sup>3</sup> |
| Crystal color and habit              | Red Plate                             |
| Diffractometer                       | Rigaku Saturn 944+ CCD                |
| Theta range for data collection      | 2.999 to 67.115°.                     |
| Index ranges                         | -35<=h<=35, -11<=k<=11, -17<=l<=17    |
| Reflections collected                | 8567                                  |
| Independent reflections              | 8567 [R(int) = 0.0951]                |
| Observed reflections (I > 2sigma(I)) | 7343                                  |
| Completeness to theta = 67.115°      | 99.3 %                                |
| Absorption correction                | Semi-empirical from equivalents       |
| Max. and min. transmission           | 1.00000 and 0.54567                   |
| Solution method                      | SHELXT-2014/5 (Sheldrick, 2014)       |
| Refinement method                    | SHELXL-2014/7 (Sheldrick, 2014)       |
| Data / restraints / parameters       | 8567 / 34 / 277                       |
| Goodness-of-fit on F <sup>2</sup>    | 1.061                                 |
| Final R indices [I>2sigma(I)]        | R1 = 0.0583, wR2 = 0.1572             |
| R indices (all data)                 | R1 = 0.0672, wR2 = 0.1636             |
| Largest diff. peak and hole          | 3.775 and -1.248 e.Å <sup>-3</sup>    |

Table S18. Atomic coordinates ( x 10<sup>4</sup>) and equivalent isotropic displacement parameters (Å<sup>2</sup>x 10<sup>3</sup>) for 007b-17101. U(eq) is defined as one third of the trace of the orthogonalized U<sup>ij</sup> tensor.

|       | x        | y        | z        | U(eq)   |
|-------|----------|----------|----------|---------|
| Rh(1) | 6338(1)  | 7018(1)  | 6060(1)  | 27(1)   |
| Cl(1) | 6544(1)  | 7745(2)  | 4594(1)  | 32(1)   |
| N(1)  | 5669(2)  | 7639(5)  | 5820(4)  | 28(1)   |
| N(2)  | 4985(2)  | 6906(5)  | 5411(4)  | 33(1)   |
| N(3)  | 5616(2)  | 5237(5)  | 5319(4)  | 31(1)   |
| C(1)  | 6054(2)  | 5248(6)  | 5499(4)  | 28(1)   |
| C(2)  | 5421(2)  | 6542(6)  | 5516(4)  | 30(1)   |
| C(3)  | 4950(2)  | 8313(7)  | 5659(5)  | 33(1)   |
| C(4)  | 5371(2)  | 8754(7)  | 5908(5)  | 32(1)   |
| C(5)  | 6305(2)  | 3955(6)  | 5265(4)  | 27(1)   |
| C(6)  | 6126(2)  | 2598(7)  | 5438(4)  | 30(1)   |
| C(7)  | 6350(2)  | 1385(7)  | 5167(4)  | 32(1)   |
| C(8)  | 6750(2)  | 1503(7)  | 4705(5)  | 35(2)   |
| C(9)  | 6933(2)  | 2847(7)  | 4542(5)  | 33(1)   |
| C(10) | 6714(2)  | 4061(7)  | 4831(4)  | 31(1)   |
| C(11) | 6925(2)  | 8117(7)  | 6794(4)  | 33(2)   |
| C(12) | 6529(2)  | 8399(7)  | 7263(4)  | 32(1)   |
| C(13) | 6332(2)  | 7029(7)  | 7479(4)  | 33(1)   |
| C(14) | 6628(2)  | 5921(7)  | 7221(4)  | 33(1)   |
| C(15) | 6982(2)  | 6580(7)  | 6742(4)  | 30(1)   |
| C(16) | 7242(2)  | 9180(8)  | 6398(5)  | 42(2)   |
| C(17) | 6335(3)  | 9831(8)  | 7481(5)  | 43(2)   |
| C(18) | 5905(3)  | 6850(8)  | 8003(5)  | 41(2)   |
| C(19) | 6574(2)  | 4364(7)  | 7420(5)  | 37(2)   |
| C(20) | 7391(2)  | 5868(8)  | 6381(5)  | 38(2)   |
| C(21) | 5284(7)  | 1580(20) | 7151(17) | 77(6)   |
| O(1)  | 4836(7)  | 1620(30) | 6853(17) | 121(7)  |
| C(22) | 5339(11) | 2500(30) | 7940(20) | 96(12)  |
| C(23) | 4991(8)  | 3620(20) | 7774(13) | 75(6)   |
| C(24) | 4683(15) | 2980(40) | 7110(30) | 150(20) |

Table S19. Bond lengths [Å] and angles [°] for 007b-17101.

|              |            |
|--------------|------------|
| Rh(1)-C(1)   | 2.027(6)   |
| Rh(1)-N(1)   | 2.077(5)   |
| Rh(1)-C(13)  | 2.126(7)   |
| Rh(1)-C(15)  | 2.168(6)   |
| Rh(1)-C(14)  | 2.172(6)   |
| Rh(1)-C(11)  | 2.268(6)   |
| Rh(1)-C(12)  | 2.274(6)   |
| Rh(1)-Cl(1)  | 2.3945(16) |
| N(1)-C(2)    | 1.331(8)   |
| N(1)-C(4)    | 1.373(8)   |
| N(2)-C(2)    | 1.335(8)   |
| N(2)-C(3)    | 1.373(8)   |
| N(2)-H(2)    | 0.8800     |
| N(3)-C(1)    | 1.310(8)   |
| N(3)-C(2)    | 1.385(8)   |
| C(1)-C(5)    | 1.467(9)   |
| C(3)-C(4)    | 1.352(9)   |
| C(3)-H(3)    | 0.9500     |
| C(4)-H(4)    | 0.9500     |
| C(5)-C(10)   | 1.391(9)   |
| C(5)-C(6)    | 1.402(9)   |
| C(6)-C(7)    | 1.380(9)   |
| C(6)-H(6)    | 0.9500     |
| C(7)-C(8)    | 1.391(10)  |
| C(7)-H(7)    | 0.9500     |
| C(8)-C(9)    | 1.393(10)  |
| C(8)-H(8)    | 0.9500     |
| C(9)-C(10)   | 1.383(9)   |
| C(9)-H(9)    | 0.9500     |
| C(10)-H(10)  | 0.9500     |
| C(11)-C(12)  | 1.406(10)  |
| C(11)-C(15)  | 1.450(9)   |
| C(11)-C(16)  | 1.500(10)  |
| C(12)-C(13)  | 1.449(10)  |
| C(12)-C(17)  | 1.497(10)  |
| C(13)-C(14)  | 1.416(10)  |
| C(13)-C(18)  | 1.513(10)  |
| C(14)-C(15)  | 1.427(9)   |
| C(14)-C(19)  | 1.496(9)   |
| C(15)-C(20)  | 1.493(9)   |
| C(16)-H(16A) | 0.9800     |
| C(16)-H(16B) | 0.9800     |
| C(16)-H(16C) | 0.9800     |
| C(17)-H(17A) | 0.9800     |
| C(17)-H(17B) | 0.9800     |
| C(17)-H(17C) | 0.9800     |
| C(18)-H(18A) | 0.9800     |
| C(18)-H(18B) | 0.9800     |
| C(18)-H(18C) | 0.9800     |
| C(19)-H(19A) | 0.9800     |
| C(19)-H(19B) | 0.9800     |
| C(19)-H(19C) | 0.9800     |

|              |         |
|--------------|---------|
| C(20)-H(20A) | 0.9800  |
| C(20)-H(20B) | 0.9800  |
| C(20)-H(20C) | 0.9800  |
| C(21)-O(1)   | 1.38(2) |
| C(21)-C(22)  | 1.47(2) |
| C(21)-H(21A) | 0.9900  |
| C(21)-H(21B) | 0.9900  |
| O(1)-C(24)   | 1.40(3) |
| C(22)-C(23)  | 1.48(2) |
| C(22)-H(22A) | 0.9900  |
| C(22)-H(22B) | 0.9900  |
| C(23)-C(24)  | 1.45(2) |
| C(23)-H(23A) | 0.9900  |
| C(23)-H(23B) | 0.9900  |
| C(24)-H(24A) | 0.9900  |
| C(24)-H(24B) | 0.9900  |

|                   |            |
|-------------------|------------|
| C(1)-Rh(1)-N(1)   | 77.2(2)    |
| C(1)-Rh(1)-C(13)  | 113.7(2)   |
| N(1)-Rh(1)-C(13)  | 97.7(2)    |
| C(1)-Rh(1)-C(15)  | 112.7(3)   |
| N(1)-Rh(1)-C(15)  | 161.4(2)   |
| C(13)-Rh(1)-C(15) | 64.2(3)    |
| C(1)-Rh(1)-C(14)  | 95.3(2)    |
| N(1)-Rh(1)-C(14)  | 128.2(2)   |
| C(13)-Rh(1)-C(14) | 38.5(3)    |
| C(15)-Rh(1)-C(14) | 38.4(2)    |
| C(1)-Rh(1)-C(11)  | 150.6(3)   |
| N(1)-Rh(1)-C(11)  | 131.6(2)   |
| C(13)-Rh(1)-C(11) | 62.8(3)    |
| C(15)-Rh(1)-C(11) | 38.1(2)    |
| C(14)-Rh(1)-C(11) | 63.3(2)    |
| C(1)-Rh(1)-C(12)  | 151.9(2)   |
| N(1)-Rh(1)-C(12)  | 100.9(2)   |
| C(13)-Rh(1)-C(12) | 38.3(3)    |
| C(15)-Rh(1)-C(12) | 62.7(2)    |
| C(14)-Rh(1)-C(12) | 63.4(3)    |
| C(11)-Rh(1)-C(12) | 36.1(3)    |
| C(1)-Rh(1)-Cl(1)  | 88.01(17)  |
| N(1)-Rh(1)-Cl(1)  | 91.65(16)  |
| C(13)-Rh(1)-Cl(1) | 157.75(19) |
| C(15)-Rh(1)-Cl(1) | 104.04(18) |
| C(14)-Rh(1)-Cl(1) | 139.83(18) |
| C(11)-Rh(1)-Cl(1) | 96.00(18)  |
| C(12)-Rh(1)-Cl(1) | 120.10(18) |
| C(2)-N(1)-C(4)    | 105.8(5)   |
| C(2)-N(1)-Rh(1)   | 110.6(4)   |
| C(4)-N(1)-Rh(1)   | 143.4(4)   |
| C(2)-N(2)-C(3)    | 107.1(5)   |
| C(2)-N(2)-H(2)    | 126.4      |
| C(3)-N(2)-H(2)    | 126.4      |
| C(1)-N(3)-C(2)    | 111.2(5)   |
| N(3)-C(1)-C(5)    | 116.5(5)   |
| N(3)-C(1)-Rh(1)   | 118.9(4)   |
| C(5)-C(1)-Rh(1)   | 124.6(4)   |
| N(1)-C(2)-N(2)    | 111.1(5)   |

|                   |          |
|-------------------|----------|
| N(1)-C(2)-N(3)    | 121.7(6) |
| N(2)-C(2)-N(3)    | 127.1(6) |
| C(4)-C(3)-N(2)    | 106.8(6) |
| C(4)-C(3)-H(3)    | 126.6    |
| N(2)-C(3)-H(3)    | 126.6    |
| C(3)-C(4)-N(1)    | 109.1(6) |
| C(3)-C(4)-H(4)    | 125.5    |
| N(1)-C(4)-H(4)    | 125.5    |
| C(10)-C(5)-C(6)   | 119.2(6) |
| C(10)-C(5)-C(1)   | 120.3(5) |
| C(6)-C(5)-C(1)    | 120.5(6) |
| C(7)-C(6)-C(5)    | 120.3(6) |
| C(7)-C(6)-H(6)    | 119.9    |
| C(5)-C(6)-H(6)    | 119.9    |
| C(6)-C(7)-C(8)    | 120.1(6) |
| C(6)-C(7)-H(7)    | 119.9    |
| C(8)-C(7)-H(7)    | 119.9    |
| C(7)-C(8)-C(9)    | 119.9(6) |
| C(7)-C(8)-H(8)    | 120.0    |
| C(9)-C(8)-H(8)    | 120.0    |
| C(10)-C(9)-C(8)   | 119.9(6) |
| C(10)-C(9)-H(9)   | 120.0    |
| C(8)-C(9)-H(9)    | 120.0    |
| C(9)-C(10)-C(5)   | 120.5(6) |
| C(9)-C(10)-H(10)  | 119.7    |
| C(5)-C(10)-H(10)  | 119.7    |
| C(12)-C(11)-C(15) | 108.2(6) |
| C(12)-C(11)-C(16) | 127.6(6) |
| C(15)-C(11)-C(16) | 124.1(6) |
| C(12)-C(11)-Rh(1) | 72.2(4)  |
| C(15)-C(11)-Rh(1) | 67.2(3)  |
| C(16)-C(11)-Rh(1) | 125.7(5) |
| C(11)-C(12)-C(13) | 106.9(6) |
| C(11)-C(12)-C(17) | 127.4(7) |
| C(13)-C(12)-C(17) | 125.7(6) |
| C(11)-C(12)-Rh(1) | 71.7(4)  |
| C(13)-C(12)-Rh(1) | 65.3(4)  |
| C(17)-C(12)-Rh(1) | 126.5(5) |
| C(14)-C(13)-C(12) | 109.4(6) |
| C(14)-C(13)-C(18) | 126.1(6) |
| C(12)-C(13)-C(18) | 124.1(6) |
| C(14)-C(13)-Rh(1) | 72.5(4)  |
| C(12)-C(13)-Rh(1) | 76.4(4)  |
| C(18)-C(13)-Rh(1) | 123.5(5) |
| C(13)-C(14)-C(15) | 106.7(6) |
| C(13)-C(14)-C(19) | 126.1(6) |
| C(15)-C(14)-C(19) | 127.2(6) |
| C(13)-C(14)-Rh(1) | 69.0(4)  |
| C(15)-C(14)-Rh(1) | 70.7(4)  |
| C(19)-C(14)-Rh(1) | 125.4(5) |
| C(14)-C(15)-C(11) | 108.3(6) |
| C(14)-C(15)-C(20) | 127.0(6) |
| C(11)-C(15)-C(20) | 124.0(6) |
| C(14)-C(15)-Rh(1) | 70.9(4)  |
| C(11)-C(15)-Rh(1) | 74.7(4)  |
| C(20)-C(15)-Rh(1) | 128.2(5) |

|                     |           |
|---------------------|-----------|
| C(11)-C(16)-H(16A)  | 109.5     |
| C(11)-C(16)-H(16B)  | 109.5     |
| H(16A)-C(16)-H(16B) | 109.5     |
| C(11)-C(16)-H(16C)  | 109.5     |
| H(16A)-C(16)-H(16C) | 109.5     |
| H(16B)-C(16)-H(16C) | 109.5     |
| C(12)-C(17)-H(17A)  | 109.5     |
| C(12)-C(17)-H(17B)  | 109.5     |
| H(17A)-C(17)-H(17B) | 109.5     |
| C(12)-C(17)-H(17C)  | 109.5     |
| H(17A)-C(17)-H(17C) | 109.5     |
| H(17B)-C(17)-H(17C) | 109.5     |
| C(13)-C(18)-H(18A)  | 109.5     |
| C(13)-C(18)-H(18B)  | 109.5     |
| H(18A)-C(18)-H(18B) | 109.5     |
| C(13)-C(18)-H(18C)  | 109.5     |
| H(18A)-C(18)-H(18C) | 109.5     |
| H(18B)-C(18)-H(18C) | 109.5     |
| C(14)-C(19)-H(19A)  | 109.5     |
| C(14)-C(19)-H(19B)  | 109.5     |
| H(19A)-C(19)-H(19B) | 109.5     |
| C(14)-C(19)-H(19C)  | 109.5     |
| H(19A)-C(19)-H(19C) | 109.5     |
| H(19B)-C(19)-H(19C) | 109.5     |
| C(15)-C(20)-H(20A)  | 109.5     |
| C(15)-C(20)-H(20B)  | 109.5     |
| H(20A)-C(20)-H(20B) | 109.5     |
| C(15)-C(20)-H(20C)  | 109.5     |
| H(20A)-C(20)-H(20C) | 109.5     |
| H(20B)-C(20)-H(20C) | 109.5     |
| O(1)-C(21)-C(22)    | 109.0(18) |
| O(1)-C(21)-H(21A)   | 109.9     |
| C(22)-C(21)-H(21A)  | 109.9     |
| O(1)-C(21)-H(21B)   | 109.9     |
| C(22)-C(21)-H(21B)  | 109.9     |
| H(21A)-C(21)-H(21B) | 108.3     |
| C(21)-O(1)-C(24)    | 104(2)    |
| C(21)-C(22)-C(23)   | 102.7(19) |
| C(21)-C(22)-H(22A)  | 111.2     |
| C(23)-C(22)-H(22A)  | 111.2     |
| C(21)-C(22)-H(22B)  | 111.2     |
| C(23)-C(22)-H(22B)  | 111.2     |
| H(22A)-C(22)-H(22B) | 109.1     |
| C(24)-C(23)-C(22)   | 103.8(19) |
| C(24)-C(23)-H(23A)  | 111.0     |
| C(22)-C(23)-H(23A)  | 111.0     |
| C(24)-C(23)-H(23B)  | 111.0     |
| C(22)-C(23)-H(23B)  | 111.0     |
| H(23A)-C(23)-H(23B) | 109.0     |
| O(1)-C(24)-C(23)    | 111(2)    |
| O(1)-C(24)-H(24A)   | 109.4     |
| C(23)-C(24)-H(24A)  | 109.4     |
| O(1)-C(24)-H(24B)   | 109.4     |
| C(23)-C(24)-H(24B)  | 109.4     |
| H(24A)-C(24)-H(24B) | 108.0     |

Symmetry transformations used to generate equivalent atoms:

Table S20. Anisotropic displacement parameters ( $\text{\AA}^2 \times 10^3$ ) for 007b-17101. The anisotropic displacement factor exponent takes the form:  $-2\pi^2 [ h^2 a^{*2} U^{11} + \dots + 2 h k a^* b^* U^{12} ]$

|       | U <sup>11</sup> | U <sup>22</sup> | U <sup>33</sup> | U <sup>23</sup> | U <sup>13</sup> | U <sup>12</sup> |
|-------|-----------------|-----------------|-----------------|-----------------|-----------------|-----------------|
| Rh(1) | 22(1)           | 30(1)           | 30(1)           | -1(1)           | 2(1)            | 0(1)            |
| Cl(1) | 34(1)           | 30(1)           | 32(1)           | 1(1)            | 5(1)            | -2(1)           |
| N(1)  | 22(3)           | 25(2)           | 38(3)           | 1(2)            | 3(2)            | -1(2)           |
| N(2)  | 19(3)           | 32(3)           | 48(3)           | -1(2)           | 1(2)            | -4(2)           |
| N(3)  | 24(3)           | 30(3)           | 40(3)           | 0(2)            | 1(2)            | 1(2)            |
| C(1)  | 27(3)           | 31(3)           | 27(3)           | 3(2)            | 3(2)            | -2(3)           |
| C(2)  | 25(3)           | 24(3)           | 41(4)           | 2(3)            | 5(3)            | -2(2)           |
| C(3)  | 29(4)           | 27(3)           | 43(4)           | 1(3)            | 1(3)            | 3(3)            |
| C(4)  | 22(3)           | 30(3)           | 46(4)           | 1(3)            | 3(3)            | 2(3)            |
| C(5)  | 25(3)           | 29(3)           | 28(3)           | 0(2)            | -2(2)           | -1(2)           |
| C(6)  | 24(3)           | 33(3)           | 32(3)           | 2(3)            | 1(3)            | 1(3)            |
| C(7)  | 30(3)           | 30(3)           | 37(3)           | 2(3)            | -1(3)           | -2(3)           |
| C(8)  | 35(4)           | 29(3)           | 41(4)           | -4(3)           | -1(3)           | 8(3)            |
| C(9)  | 27(3)           | 34(3)           | 38(4)           | -1(3)           | 4(3)            | 4(3)            |
| C(10) | 25(3)           | 29(3)           | 39(4)           | 2(3)            | 1(3)            | 1(3)            |
| C(11) | 25(3)           | 44(4)           | 31(3)           | -4(3)           | -7(3)           | -3(3)           |
| C(12) | 33(4)           | 39(3)           | 25(3)           | -8(3)           | -5(3)           | -2(3)           |
| C(13) | 26(3)           | 44(4)           | 30(3)           | 0(3)            | 1(3)            | -2(3)           |
| C(14) | 26(3)           | 44(4)           | 28(3)           | 3(3)            | -1(3)           | 0(3)            |
| C(15) | 25(3)           | 39(3)           | 27(3)           | 0(3)            | -4(3)           | 0(3)            |
| C(16) | 34(4)           | 43(4)           | 48(4)           | 2(3)            | -4(3)           | -11(3)          |
| C(17) | 48(5)           | 44(4)           | 37(4)           | -10(3)          | -4(3)           | 6(3)            |
| C(18) | 32(4)           | 59(5)           | 31(4)           | -2(3)           | 6(3)            | 3(3)            |
| C(19) | 39(4)           | 37(4)           | 35(4)           | 6(3)            | -1(3)           | -4(3)           |
| C(20) | 26(3)           | 50(4)           | 38(4)           | 0(3)            | 3(3)            | 5(3)            |
| C(21) | 64(10)          | 61(10)          | 107(15)         | -49(11)         | 6(9)            | 21(8)           |
| O(1)  | 84(11)          | 117(13)         | 163(18)         | -47(12)         | 10(10)          | 12(9)           |
| C(22) | 95(16)          | 78(15)          | 113(17)         | -53(15)         | -2(15)          | 35(16)          |
| C(23) | 84(13)          | 54(8)           | 88(16)          | -17(8)          | 24(13)          | 18(10)          |
| C(24) | 120(20)         | 130(20)         | 180(30)         | -70(20)         | -40(20)         | 54(17)          |

Table S21. Hydrogen coordinates ( $\times 10^4$ ) and isotropic displacement parameters ( $\text{\AA}^2 \times 10^{-3}$ ) for 007b-17101.

|        | x    | y     | z    | U(eq) |
|--------|------|-------|------|-------|
| H(2)   | 4762 | 6348  | 5219 | 40    |
| H(3)   | 4680 | 8870  | 5656 | 40    |
| H(4)   | 5449 | 9687  | 6111 | 39    |
| H(6)   | 5850 | 2513  | 5744 | 35    |
| H(7)   | 6230 | 468   | 5295 | 39    |
| H(8)   | 6899 | 669   | 4502 | 42    |
| H(9)   | 7208 | 2930  | 4231 | 39    |
| H(10)  | 6844 | 4975  | 4733 | 37    |
| H(16A) | 7307 | 8895  | 5785 | 62    |
| H(16B) | 7525 | 9211  | 6757 | 62    |
| H(16C) | 7101 | 10128 | 6392 | 62    |



|        |      |       |      |     |
|--------|------|-------|------|-----|
| H(17A) | 6457 | 10554 | 7081 | 65  |
| H(17B) | 6416 | 10077 | 8101 | 65  |
| H(17C) | 6004 | 9798  | 7403 | 65  |
| H(18A) | 5680 | 7562  | 7804 | 61  |
| H(18B) | 5977 | 6984  | 8640 | 61  |
| H(18C) | 5782 | 5889  | 7903 | 61  |
| H(19A) | 6254 | 4097  | 7349 | 56  |
| H(19B) | 6681 | 4171  | 8034 | 56  |
| H(19C) | 6754 | 3803  | 7006 | 56  |
| H(20A) | 7328 | 4850  | 6289 | 57  |
| H(20B) | 7648 | 5979  | 6806 | 57  |
| H(20C) | 7465 | 6309  | 5810 | 57  |
| H(21A) | 5483 | 1919  | 6675 | 93  |
| H(21B) | 5371 | 588   | 7307 | 93  |
| H(22A) | 5647 | 2919  | 7983 | 115 |
| H(22B) | 5281 | 1966  | 8495 | 115 |
| H(23A) | 4832 | 3850  | 8327 | 90  |
| H(23B) | 5129 | 4500  | 7539 | 90  |
| H(24A) | 4378 | 2886  | 7365 | 175 |
| H(24B) | 4657 | 3606  | 6583 | 175 |

Table S22. Torsion angles [°] for 007b-17101.

|                         |           |
|-------------------------|-----------|
| C(2)-N(3)-C(1)-C(5)     | -176.2(5) |
| C(2)-N(3)-C(1)-Rh(1)    | 3.3(7)    |
| C(4)-N(1)-C(2)-N(2)     | -0.2(8)   |
| Rh(1)-N(1)-C(2)-N(2)    | 176.3(4)  |
| C(4)-N(1)-C(2)-N(3)     | 177.7(6)  |
| Rh(1)-N(1)-C(2)-N(3)    | -5.8(8)   |
| C(3)-N(2)-C(2)-N(1)     | 0.1(8)    |
| C(3)-N(2)-C(2)-N(3)     | -177.7(6) |
| C(1)-N(3)-C(2)-N(1)     | 2.0(9)    |
| C(1)-N(3)-C(2)-N(2)     | 179.6(6)  |
| C(2)-N(2)-C(3)-C(4)     | 0.0(8)    |
| N(2)-C(3)-C(4)-N(1)     | -0.1(8)   |
| C(2)-N(1)-C(4)-C(3)     | 0.2(8)    |
| Rh(1)-N(1)-C(4)-C(3)    | -174.2(6) |
| N(3)-C(1)-C(5)-C(10)    | 134.6(6)  |
| Rh(1)-C(1)-C(5)-C(10)   | -44.9(8)  |
| N(3)-C(1)-C(5)-C(6)     | -42.4(8)  |
| Rh(1)-C(1)-C(5)-C(6)    | 138.1(5)  |
| C(10)-C(5)-C(6)-C(7)    | -1.1(9)   |
| C(1)-C(5)-C(6)-C(7)     | 175.9(6)  |
| C(5)-C(6)-C(7)-C(8)     | -1.1(10)  |
| C(6)-C(7)-C(8)-C(9)     | 2.0(10)   |
| C(7)-C(8)-C(9)-C(10)    | -0.6(10)  |
| C(8)-C(9)-C(10)-C(5)    | -1.7(10)  |
| C(6)-C(5)-C(10)-C(9)    | 2.6(10)   |
| C(1)-C(5)-C(10)-C(9)    | -174.5(6) |
| C(15)-C(11)-C(12)-C(13) | -1.8(7)   |
| C(16)-C(11)-C(12)-C(13) | 177.8(6)  |
| Rh(1)-C(11)-C(12)-C(13) | 56.0(4)   |
| C(15)-C(11)-C(12)-C(17) | 179.9(6)  |
| C(16)-C(11)-C(12)-C(17) | -0.5(11)  |
| Rh(1)-C(11)-C(12)-C(17) | -122.4(7) |

|                         |           |
|-------------------------|-----------|
| C(15)-C(11)-C(12)-Rh(1) | -57.7(4)  |
| C(16)-C(11)-C(12)-Rh(1) | 121.8(7)  |
| C(11)-C(12)-C(13)-C(14) | 5.6(7)    |
| C(17)-C(12)-C(13)-C(14) | -176.0(6) |
| Rh(1)-C(12)-C(13)-C(14) | 65.6(5)   |
| C(11)-C(12)-C(13)-C(18) | 178.6(6)  |
| C(17)-C(12)-C(13)-C(18) | -3.0(11)  |
| Rh(1)-C(12)-C(13)-C(18) | -121.4(7) |
| C(11)-C(12)-C(13)-Rh(1) | -60.0(5)  |
| C(17)-C(12)-C(13)-Rh(1) | 118.4(6)  |
| C(12)-C(13)-C(14)-C(15) | -7.2(7)   |
| C(18)-C(13)-C(14)-C(15) | -180.0(6) |
| Rh(1)-C(13)-C(14)-C(15) | 61.0(4)   |
| C(12)-C(13)-C(14)-C(19) | 172.7(6)  |
| C(18)-C(13)-C(14)-C(19) | -0.1(11)  |
| Rh(1)-C(13)-C(14)-C(19) | -119.2(7) |
| C(12)-C(13)-C(14)-Rh(1) | -68.2(5)  |
| C(18)-C(13)-C(14)-Rh(1) | 119.1(7)  |
| C(13)-C(14)-C(15)-C(11) | 6.0(7)    |
| C(19)-C(14)-C(15)-C(11) | -173.8(6) |
| Rh(1)-C(14)-C(15)-C(11) | 65.9(4)   |
| C(13)-C(14)-C(15)-C(20) | 176.1(6)  |
| C(19)-C(14)-C(15)-C(20) | -3.8(11)  |
| Rh(1)-C(14)-C(15)-C(20) | -124.0(6) |
| C(13)-C(14)-C(15)-Rh(1) | -59.9(4)  |
| C(19)-C(14)-C(15)-Rh(1) | 120.2(7)  |
| C(12)-C(11)-C(15)-C(14) | -2.6(7)   |
| C(16)-C(11)-C(15)-C(14) | 177.8(6)  |
| Rh(1)-C(11)-C(15)-C(14) | -63.5(4)  |
| C(12)-C(11)-C(15)-C(20) | -173.1(6) |
| C(16)-C(11)-C(15)-C(20) | 7.3(10)   |
| Rh(1)-C(11)-C(15)-C(20) | 126.1(6)  |
| C(12)-C(11)-C(15)-Rh(1) | 60.8(5)   |
| C(16)-C(11)-C(15)-Rh(1) | -118.7(6) |
| C(22)-C(21)-O(1)-C(24)  | 29(4)     |
| O(1)-C(21)-C(22)-C(23)  | -30(4)    |
| C(21)-C(22)-C(23)-C(24) | 19(5)     |
| C(21)-O(1)-C(24)-C(23)  | -16(5)    |
| C(22)-C(23)-C(24)-O(1)  | -3(6)     |

---

Symmetry transformations used to generate equivalent atoms:

Table S23. Hydrogen bonds for 007b-17101 [ $\text{\AA}$  and  $^\circ$ ].

| D-H...A            | d(D-H) | d(H...A) | d(D...A) | <(DHA) |
|--------------------|--------|----------|----------|--------|
| N(2)-H(2)...N(3)#1 | 0.88   | 2.01     | 2.871(7) | 165.4  |

---

Symmetry transformations used to generate equivalent atoms:

#1 -x+1,-y+1,-z+1

- 
- <sup>1</sup> (a) Zheng, G.; Tian, M.; Xu, Y.; Chen, X.; Li, X. *Org. Chem. Front.* DOI: 10.1039/c7qo01033h. (b) Xu, Y.; Zheng, G.; Yang, X.; Li, X. *Chem. Commun.* DOI: 10.1039/c7cc07753j.
- <sup>2</sup> Li, H.; Zhao, J.; Zeng, L.; Hu, W. *J. Org. Chem.* **2011**, *76*, 8064–8069.
- <sup>3</sup> Li, F.; Kang, Q.; Shan, H.; Chen, L.; Xie, J. *Eur. J. Org. Chem.* **2012**, 5085–5092.
- <sup>4</sup> Tan, K. L.; Park, S.; Ellman, J. A.; Bergman, R. G. *J. Org. Chem.* **2004**, *69*, 7329–7335.
- <sup>5</sup> Wu, Y.; Zhou, X.; Zheng, G.; Li, X. *Org. Lett.* **2017**, *19*, 5256–5259.
- <sup>6</sup> Phelps, A. M.; Chan, V. S.; Napolitano, J. G.; Krabbe, S. W.; Schomaker, J. M.; Shekhar, S. *J. Org. Chem.* **2016**, *81*, 4158–4169.
- <sup>7</sup> Barday, M.; Janot, C.; Halcovitch, N. R.; Muir, J.; Aïssa, C. *Angew. Chem. Int. Ed.* **2017**, *56*, 13117–13121.
